# Supplementary material for: Combinatorial BCL2 Family Expression in Acute Myeloid Leukemia Stem Cells Predicts Clinical Response to Azacitidine/Venetoclax
Source: PubMed Central journal article supplement — Cancer Discov. 2023 Mar 9;13(6):1408–27. doi: 10.1158/2159-8290.CD-22-0939 (PMC10236156; doi:10.1158/2159-8290.cd-22-0939), 2023-03-09
Supplement: cd-22-0939_supplementary_figure_1_suppsf1.pdf [file cd-22-0939_supplementary_figure_1_suppsf1.pdf]

# Supplementary Figure 1

**A**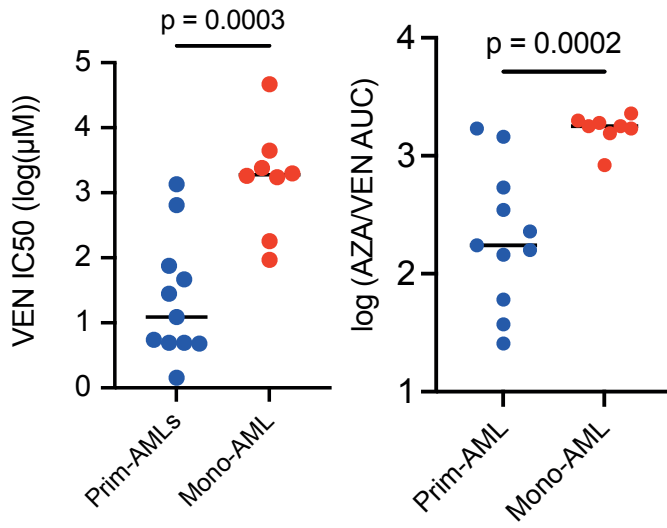**B**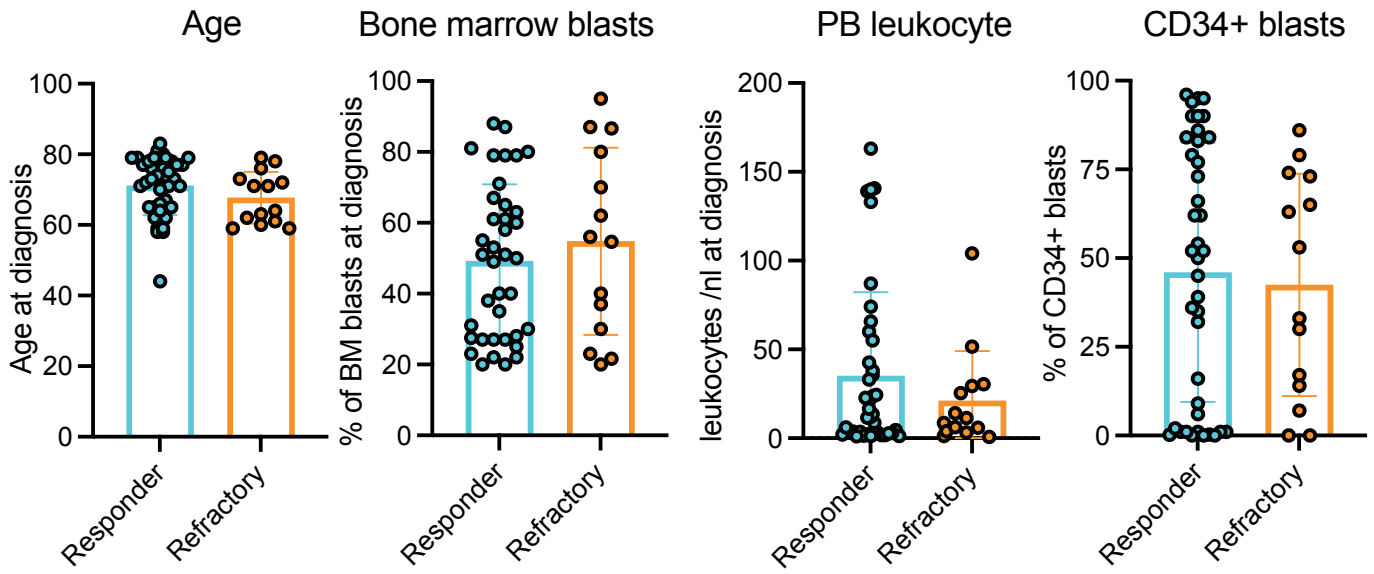**C**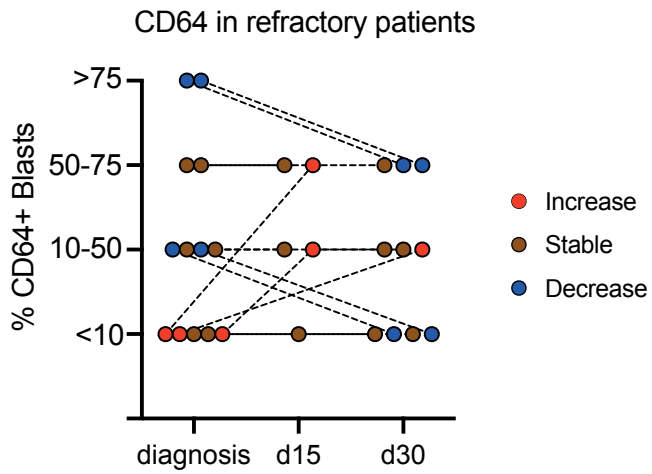

**Supplementary Figure 1: Cell line sensitivity and additional patient data**

**A** IC50s for VEN of 19 AML cell lines classified as primitive (Prim-AML, n = 11) or monocytic (Mono-AML, n = 8) treated *ex vivo* with 1.5  $\mu$ M of 5-AZA and increasing concentrations of VEN for 72 hours. Representative data of two independent experiments. Each dot represents a cell line with the line marking the mean. Mann-Whitney test was used to compare the two groups.

**B** Pre-treatment clinical characteristics of 54 AML patients treated with 5-AZA/VEN as first-line therapy, including age, percentage of bone marrow blasts, peripheral leukocyte counts and percentage of CD34<sup>+</sup> cells. Each dot represents an individual AML patient.

**C** Percentage of CD64<sup>+</sup> AML cells of refractory AML patients pre-treatment and after induction at day 15 and day 30. Dashed lines connect different time points of the same patient.

d: Day
