# Supplementary material for: Combinatorial BCL2 Family Expression in Acute Myeloid Leukemia Stem Cells Predicts Clinical Response to Azacitidine/Venetoclax
Source: PubMed Central journal article supplement — Cancer Discov. 2023 Mar 9;13(6):1408–27. doi: 10.1158/2159-8290.CD-22-0939 (PMC10236156; doi:10.1158/2159-8290.cd-22-0939), 2023-03-09
Supplement: cd-22-0939_supplementary_figure_2_suppsf2.pdf [file cd-22-0939_supplementary_figure_2_suppsf2.pdf]

# Supplementary Figure 2

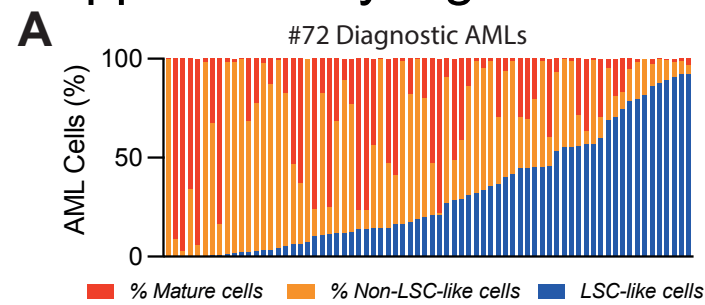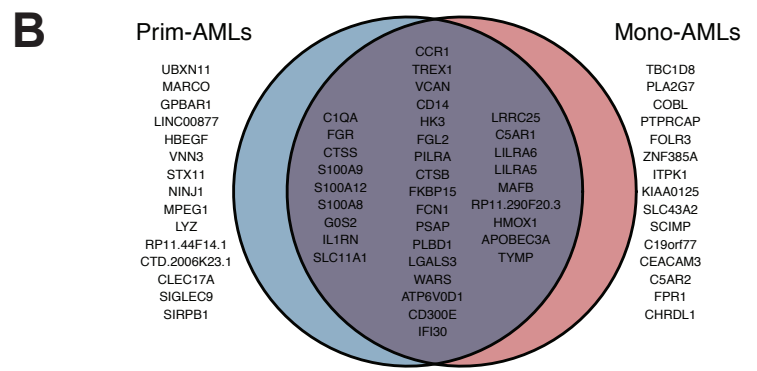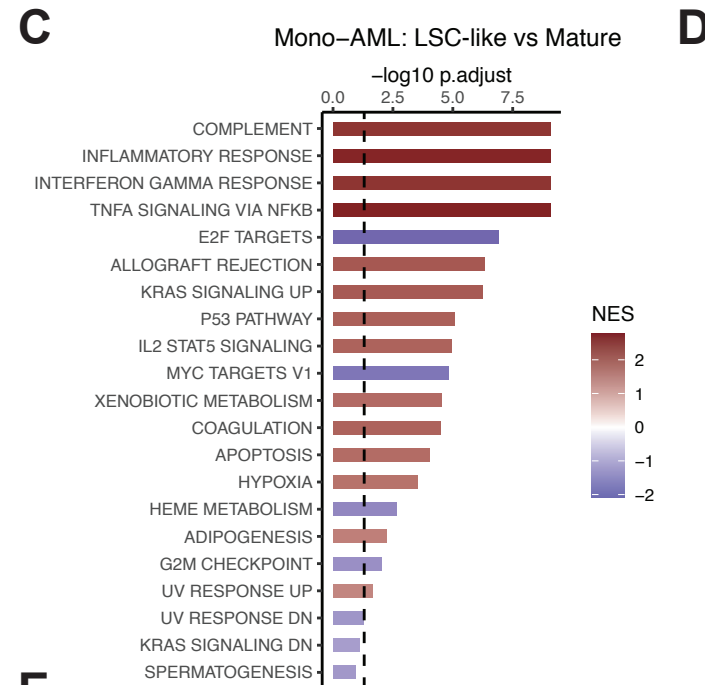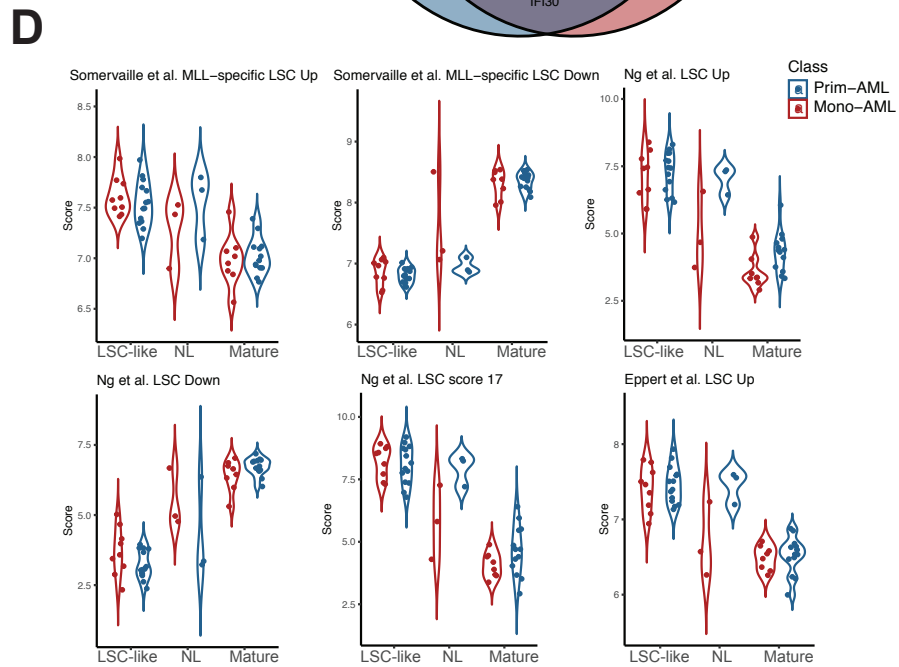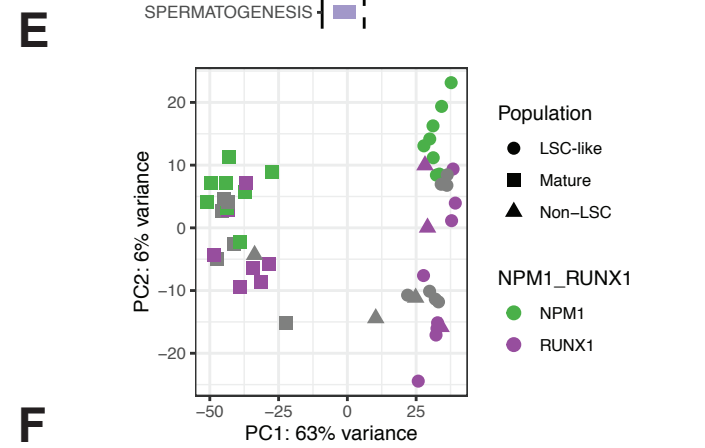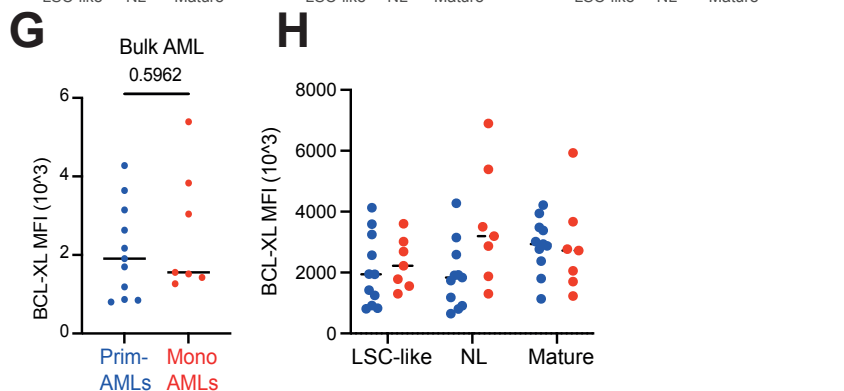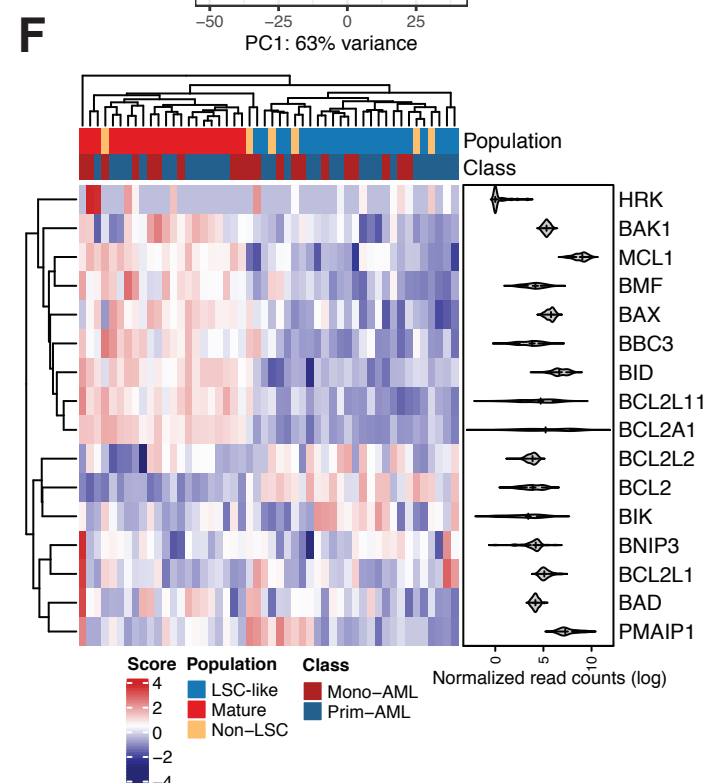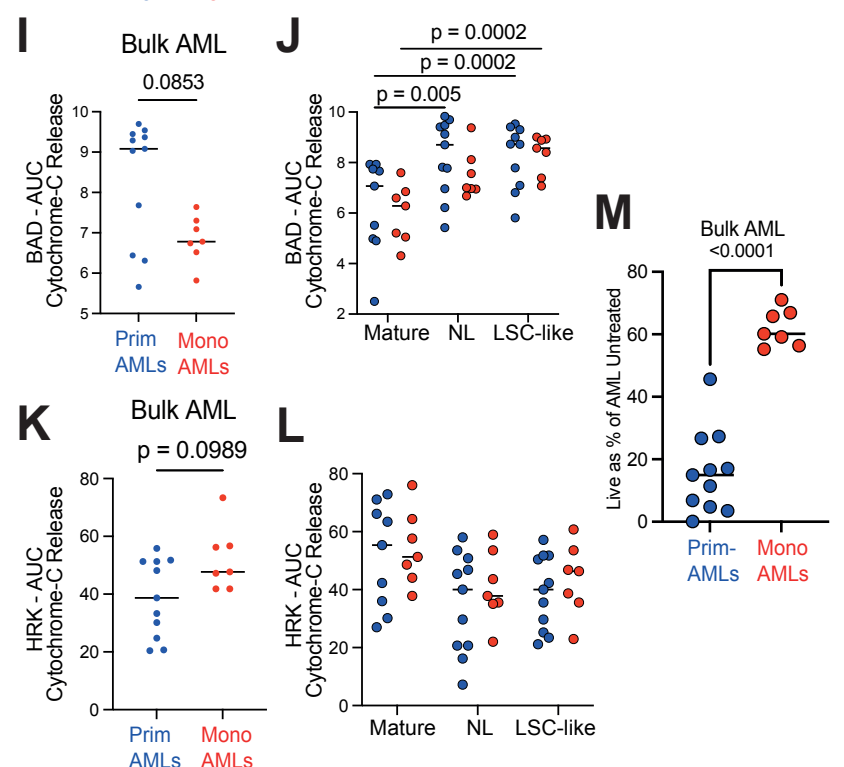

## **Supplementary Figure 2: Transcriptomic and functional characterization of *LSC-like* cells**

**A** Percentages of *Mature*, *non-LSC* and *LSC-like* subpopulations among bulk AML cells in 72 diagnostic AML samples sorted by frequency of *LSC-like* subpopulation.

**B** Top 50 differentially expressed genes between *Mature* and *LSC-like* subpopulations specific to Prim- or Mono-AMLs or shared by both subclasses.

**C** Gene-set enrichment analysis (GSEA) results comparing *LSC-like* and *Mature* subpopulations from Mono-AMLs.

**D** Transcriptome-based LSC scores using different stemness signatures in *LSC-like*, *non-LSC* and *Mature* subpopulations

**E** PCA plot of bulk RNA-seq data from *LSC-like*, *non-LSC* and *Mature* subpopulations from Prim-AMLs (n = 14) and Mono-AMLs (n = 9) annotated based on mutation and subpopulation.

**F** Heatmap of apoptosis regulators in *LSC-like*, *non-LSC* and *Mature* subpopulations from Prim- and Mono-AMLs.

**G-H** Mean Fluorescence Intensity (MFI) of BCL-xL in **G** AML bulk and **H** *LSC-like*, *non-LSC* and *Mature* subpopulations from Prim-AML (n = 11) or Mono-AML (n = 7) patient samples.

**I-J** AUC of BAD mediated cytochrome C release in **I** AML bulk and **J** *LSC-like*, *non-LSC* and *Mature* subpopulations from Prim-AML (n = 11) or Mono-AML (n = 7) patient samples.

**K-L** AUC of HRK mediated cytochrome C release in **K** AML bulk and **L** *LSC-like*, *non-LSC* and *Mature* subpopulations from Prim-AML (n = 11) or Mono-AML (n = 7) patient samples.

**M** Relative viability of leukemic bulk from Prim-AML (n = 11) or Mono-AML (n = 7) patient samples from mononuclear cells of diagnostic AML patient samples (N = 17) treated *ex vivo* for 24 hours at 1.5  $\mu$ M 5-AZA and 100 nM VEN.

Two-Way ANOVA with Tukey correction for multiple comparisons test was used to compare groups of four and Mann-Whitney test was used to compare groups of two unless specified otherwise. Each dot represents an AML patient sample with the line marking the mean unless specified otherwise.

LSC: Leukemic stem cell, NES: Normalized Enrichment Score, NL: non-LSC
