# Supplementary material for: Combinatorial BCL2 Family Expression in Acute Myeloid Leukemia Stem Cells Predicts Clinical Response to Azacitidine/Venetoclax
Source: PubMed Central journal article supplement — Cancer Discov. 2023 Mar 9;13(6):1408–27. doi: 10.1158/2159-8290.CD-22-0939 (PMC10236156; doi:10.1158/2159-8290.cd-22-0939), 2023-03-09
Supplement: cd-22-0939_supplementary_figure_3_suppsf3.pdf [file cd-22-0939_supplementary_figure_3_suppsf3.pdf]

# Supplementary Figure 3

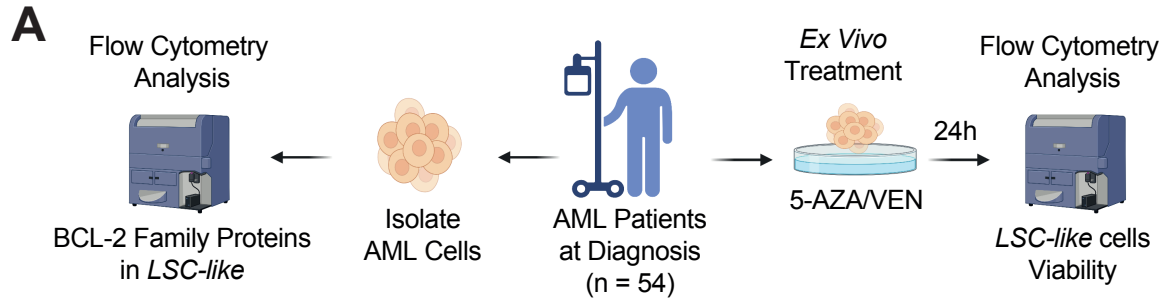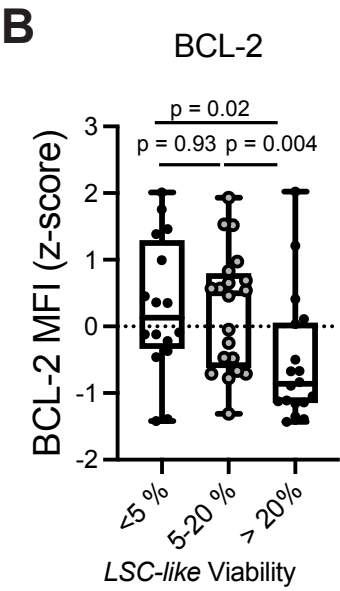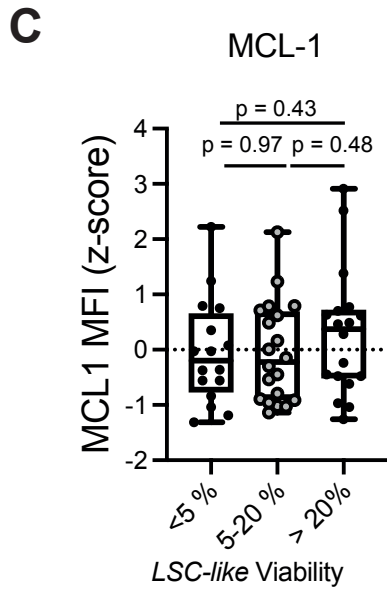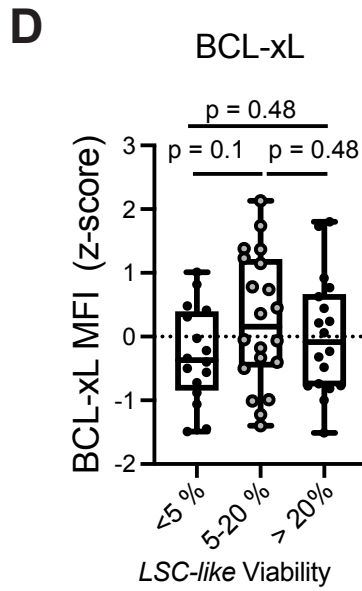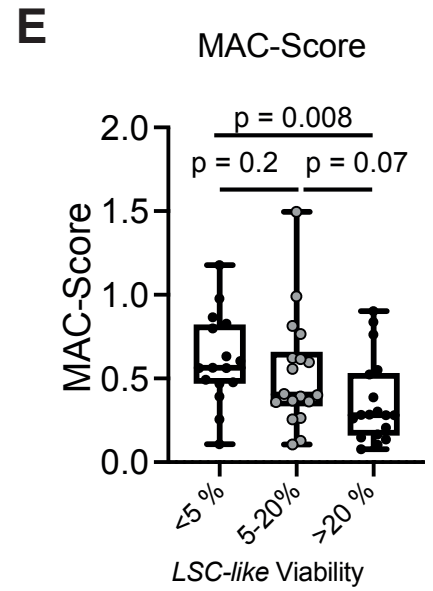

**Supplementary Figure 3: BCL-2 family gene expression in *LSC-like* cells predicts *in vitro* response to 5-AZA/VEN**

**A** Schematic representation of experimental design for **B-D**. BCL-2 family protein expression levels and response to *ex vivo* 5-AZA/VEN treatment of mononuclear cells from diagnostic AML patient samples was assessed by flow cytometry.

**B-D** Treatment-naïve AML patient samples were stratified based on *ex vivo* cell viability in *LSC-like* cells after 24h and plotted for pre-culture BCL-2, MCL-1 or BCL-xL Mean Fluorescence Intensity (MFI) z-scores or **E** MAC-Score calculated based on normalized BCL-2 family protein expression levels in *LSC-like* cells from diagnostic AML patients.

Each dot represents an AML patient sample with the line marking the mean unless specified otherwise. Mann-Whitney test was used to compare groups. LSC: Leukemic stem cell, MAC-Score: Mediators of Apoptosis Combinatorial Score
