# Supplementary material for: Combinatorial BCL2 Family Expression in Acute Myeloid Leukemia Stem Cells Predicts Clinical Response to Azacitidine/Venetoclax
Source: PubMed Central journal article supplement — Cancer Discov. 2023 Mar 9;13(6):1408–27. doi: 10.1158/2159-8290.CD-22-0939 (PMC10236156; doi:10.1158/2159-8290.cd-22-0939), 2023-03-09
Supplement: cd-22-0939_supplementary_figure_4_suppsf4.pdf [file cd-22-0939_supplementary_figure_4_suppsf4.pdf]

# Supplementary Figure 4

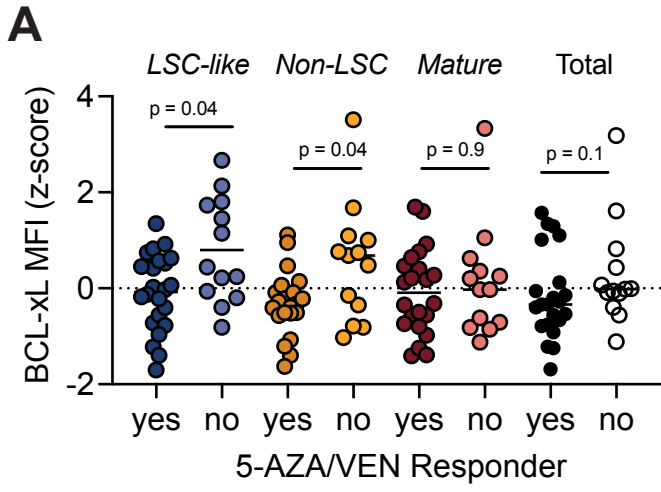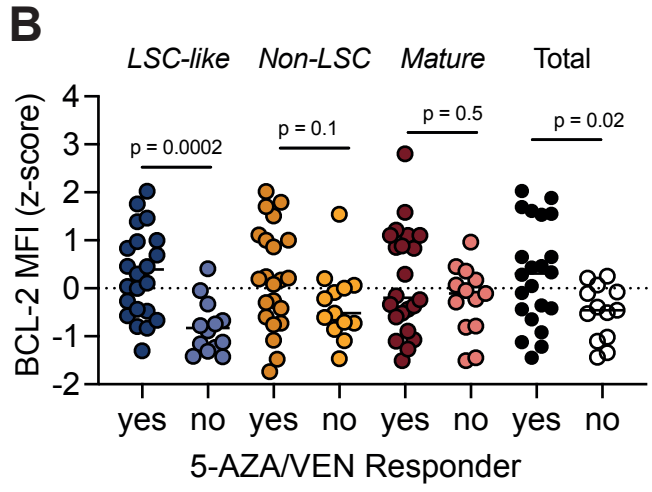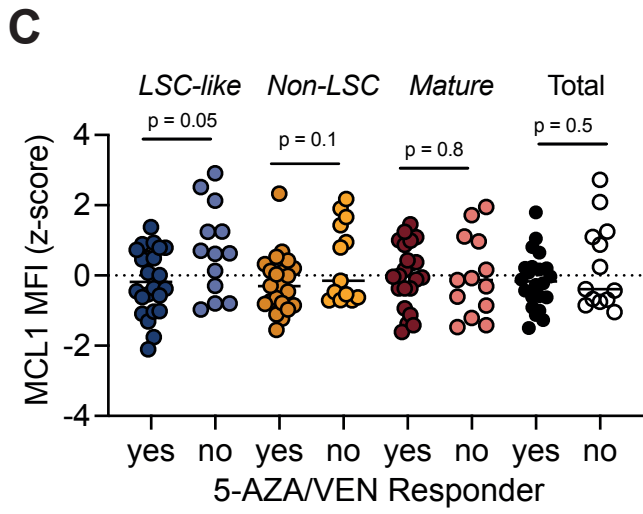

**Supplementary Figure 4: Subpopulation-specific BCL-2 family levels and response to 5-AZA/VEN**

**A-C** z-scores for **A** BCL-xL, **B** BCL-2, and **C** MCL-1 in *LSC-like*, *non-LSC*, *Mature* and total blast cells from diagnostic first-line 5-AZA/VEN AML patients from cohorts 1 and 2 combined with 5-AZA/VEN therapy outcome. LSC: Leukemic stem cell, MFI: Mean Fluorescence Intensity, 5-AZA: Azacitidine, VEN: Venetoclax
