# Supplementary material for: Combinatorial BCL2 Family Expression in Acute Myeloid Leukemia Stem Cells Predicts Clinical Response to Azacitidine/Venetoclax
Source: PubMed Central journal article supplement — Cancer Discov. 2023 Mar 9;13(6):1408–27. doi: 10.1158/2159-8290.CD-22-0939 (PMC10236156; doi:10.1158/2159-8290.cd-22-0939), 2023-03-09
Supplement: cd-22-0939_supplementary_figure_5_suppsf5.pdf [file cd-22-0939_supplementary_figure_5_suppsf5.pdf]

# Supplementary Figure 5

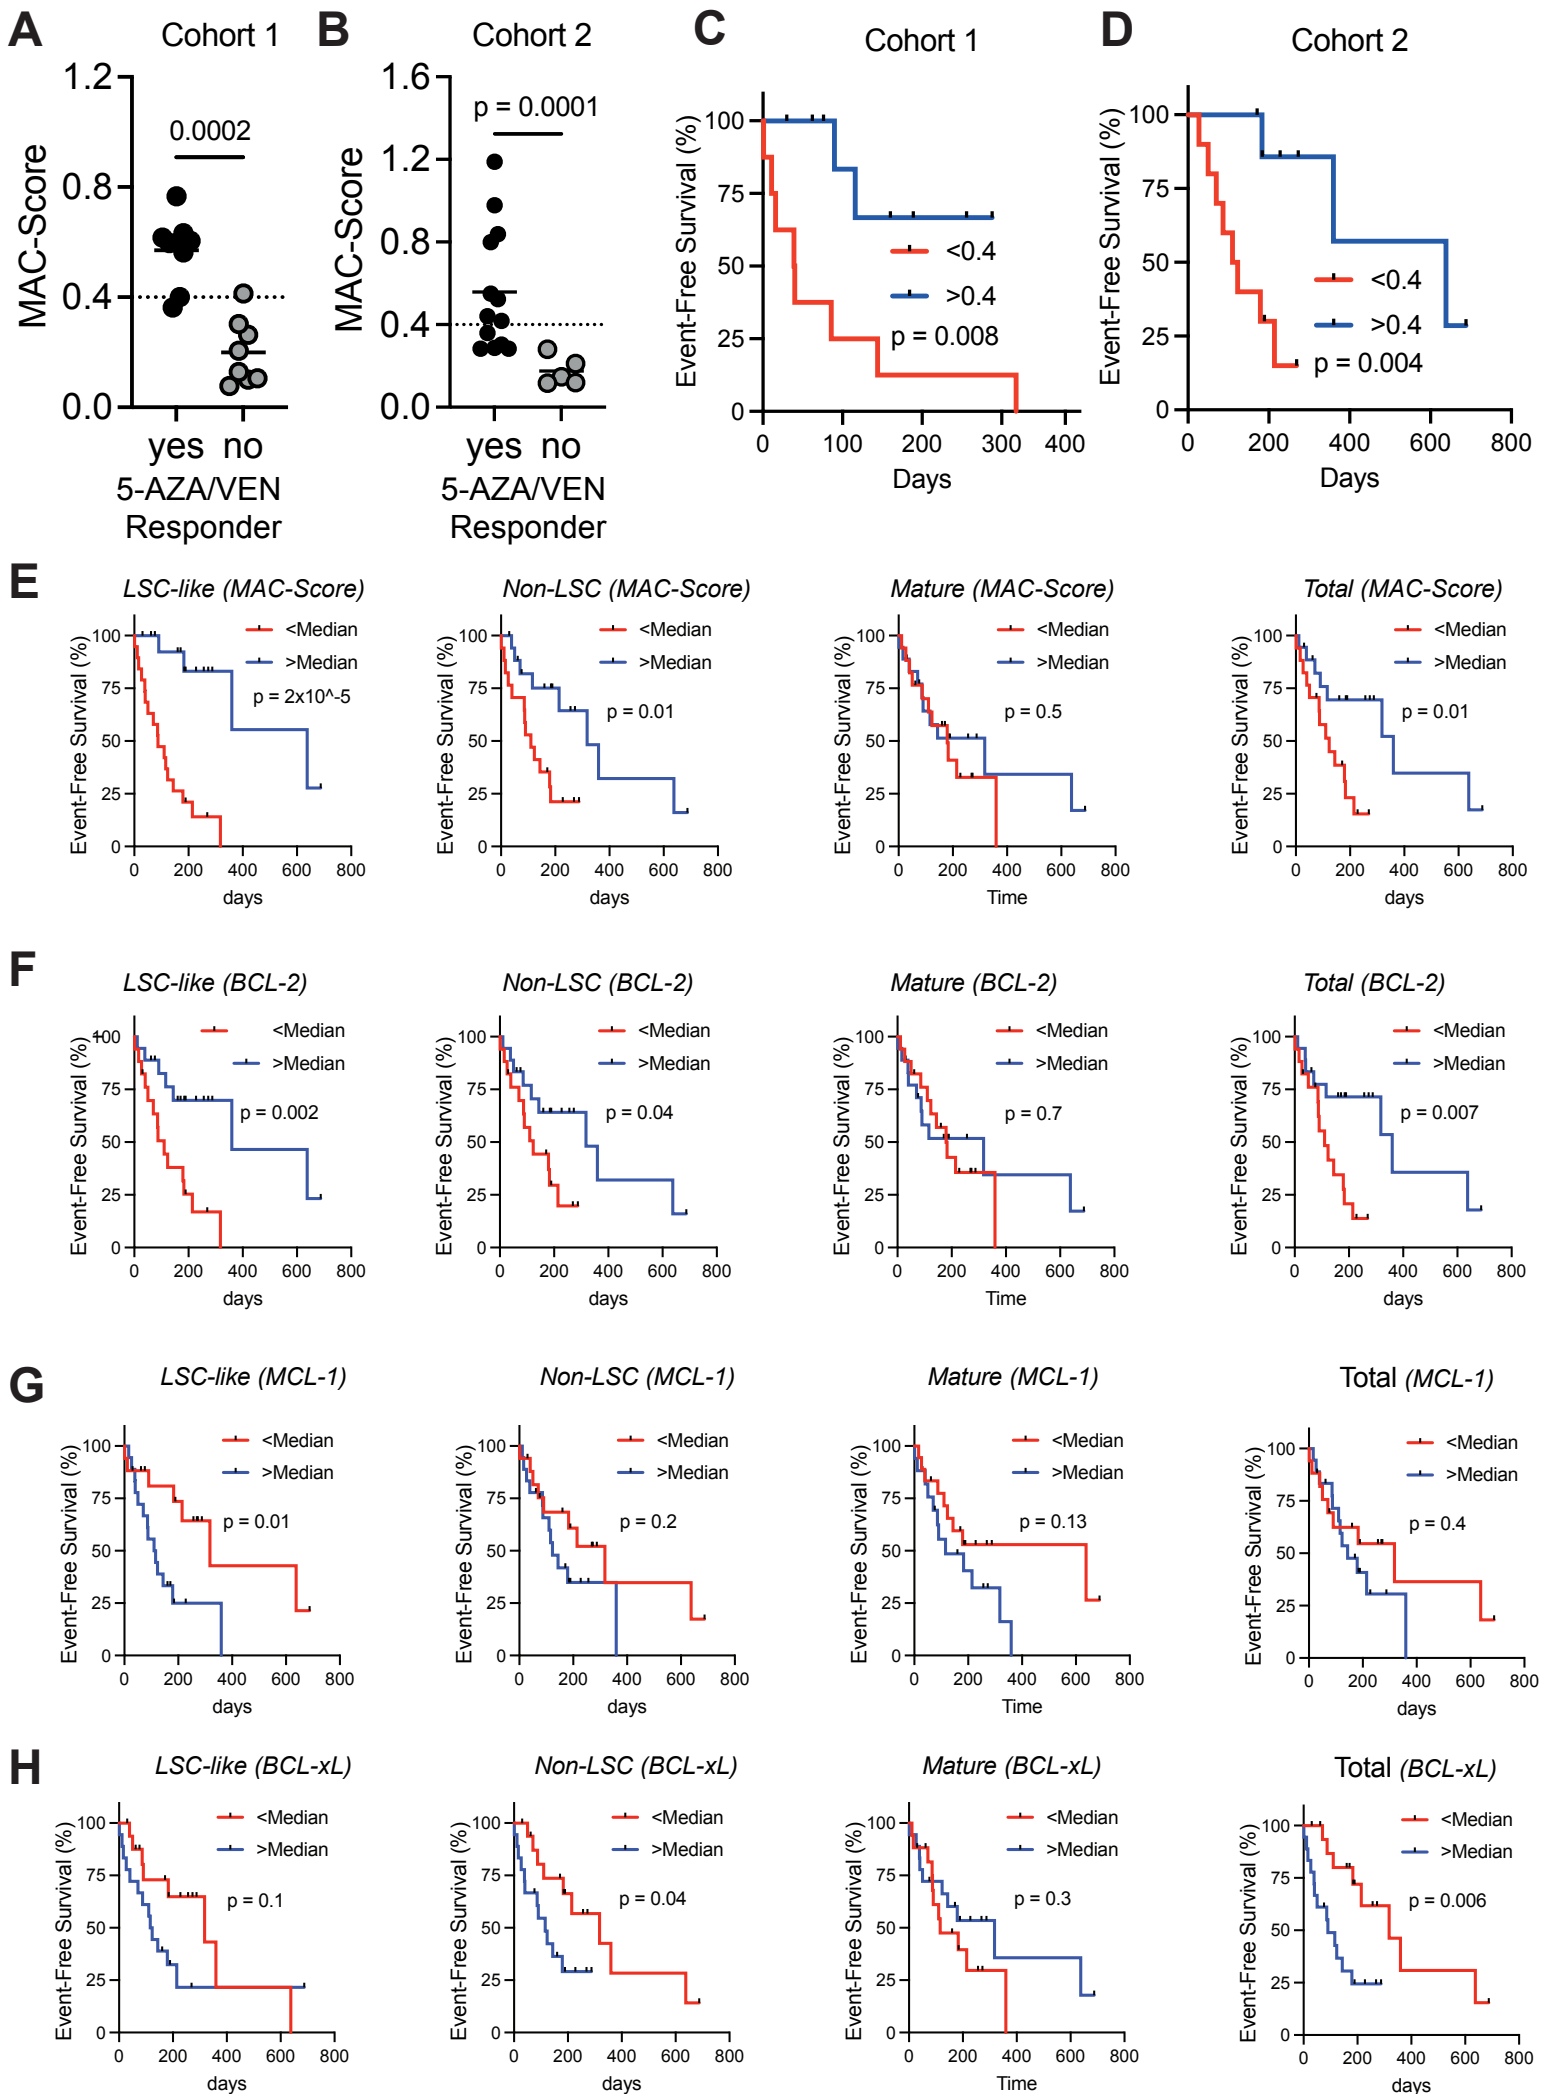

**Supplementary Figure 5: Subpopulation-specific BCL-2 family levels and time on 5-AZA/VEN**

**A-B** MAC-Score of AML patients from **A** cohort 1 (n=17) and **B** cohort 2 (n=18) with 5-AZA/VEN therapy outcome.

**C-D** Event-free survival of first-line 5-AZA/VEN AML patients from **C** cohort 1 and **D** cohort 2 with above (>0.4) and below (<0.4) median MAC-Score.

**E-H** Event-free survival of first-line 5-AZA/VEN AML patients from cohorts 1 and 2 combined with above and below median **E** MAC-Score, **F** BCL-2 expression, **G** MCL-1 expression and **H** BCL-xL expression in *LSC-like*, *non-LSC*, *Mature* and total blast cells. LSC: Leukemic stem cell, MAC-Score: Mediators of Apoptosis Combinatorial Score, 5-AZA: Azacitidine, VEN: Venetoclax
