# Supplementary material for: Combinatorial BCL2 Family Expression in Acute Myeloid Leukemia Stem Cells Predicts Clinical Response to Azacitidine/Venetoclax
Source: PubMed Central journal article supplement — Cancer Discov. 2023 Mar 9;13(6):1408–27. doi: 10.1158/2159-8290.CD-22-0939 (PMC10236156; doi:10.1158/2159-8290.cd-22-0939), 2023-03-09
Supplement: cd-22-0939_supplementary_figure_7_suppsf7.pdf [file cd-22-0939_supplementary_figure_7_suppsf7.pdf]

# Supplementary Figure 7

**A**

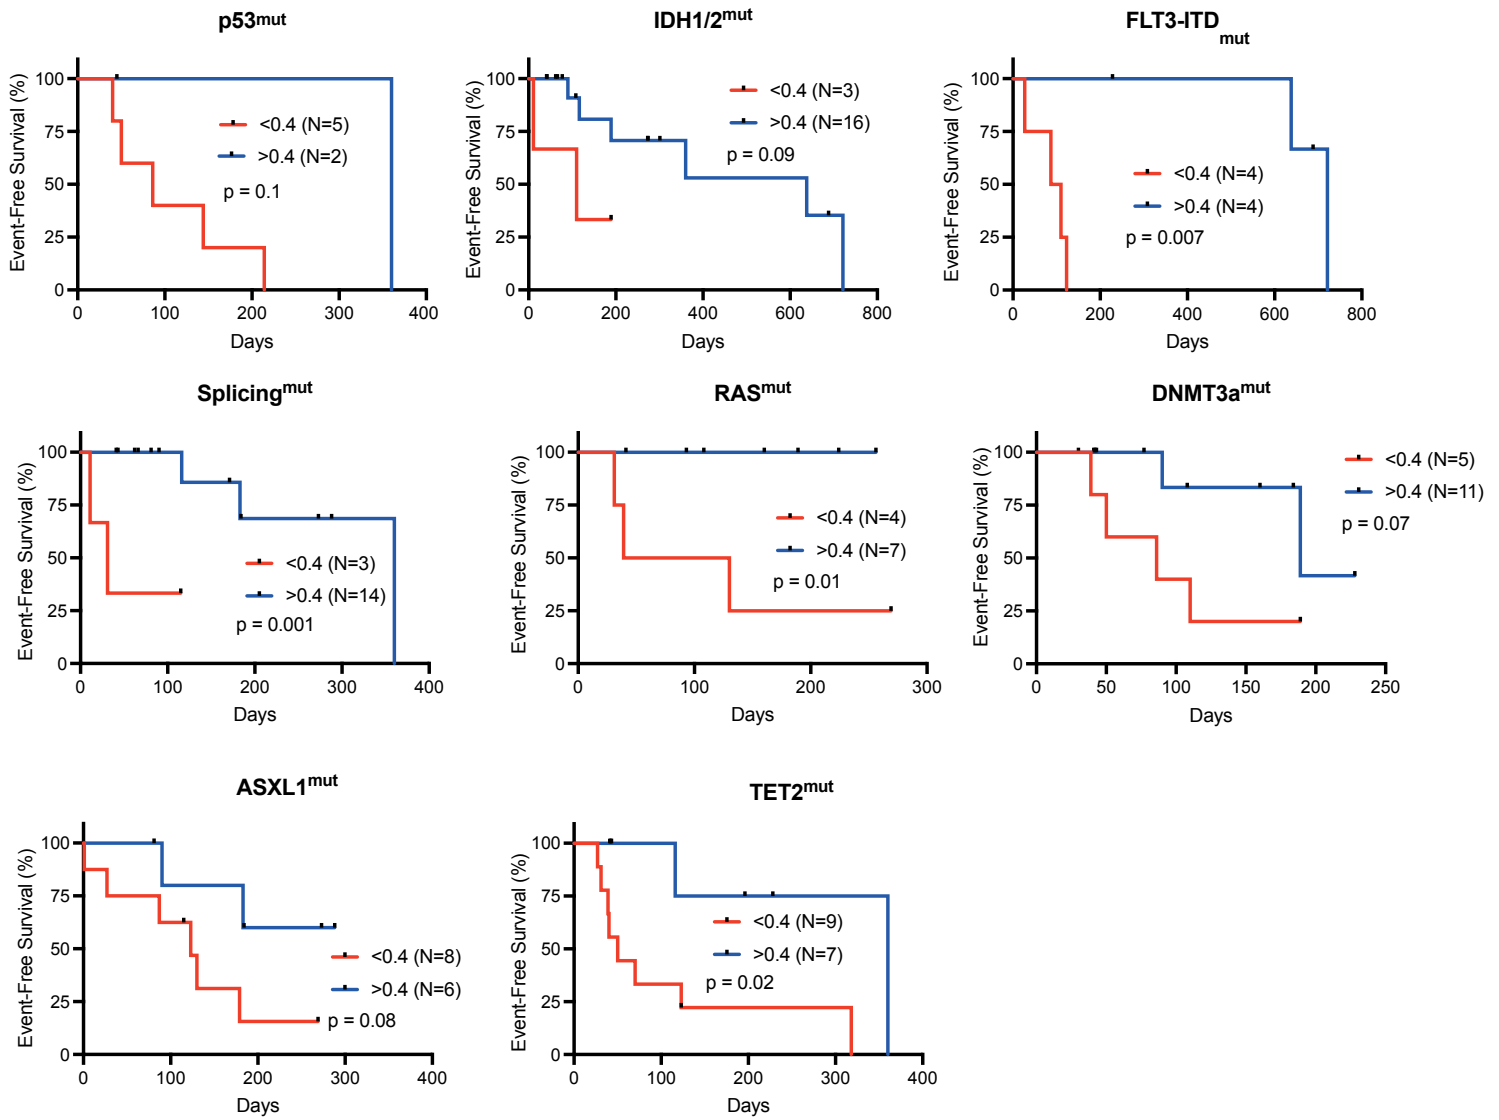

**B**

| Patient characteristics | Total (n = 95)    | Univariate Estimate (SE) | p-value | Multivariate Estimate (SE) | p-value |
|-------------------------|-------------------|--------------------------|---------|----------------------------|---------|
| MAC-Score (Median)      | 0.48 (0.08 - 1.5) |                          |         |                            |         |
| <b>Genetics:</b>        |                   |                          |         |                            |         |
| Complex                 | 11 (11.6 %)       | -0.32 (0.94)             | 0.001   | -0.31 (0.12)               | 0.01    |
| <i>TP53</i>             | 8 (8.4 %)         | -0.24 (0.11)             | 0.035   | 0.11 (0.14)                | 0.45    |
| <i>RUNX1</i>            | 19 (20 %)         | -0.02 (0.08)             | 0.83    |                            |         |
| <i>FLT3</i>             | 18 (18.9 %)       | -0.00 (0.08)             | 0.97    |                            |         |
| <i>DNMT3A</i>           | 30 (31.6 %)       | 0.18 (0.07)              | 0.01    | 0.13 (0.06)                | 0.04    |
| <i>N/KRAS</i>           | 19 (20 %)         | 0.05 (0.08)              | 0.52    |                            |         |
| <i>IDH1/2</i>           | 26 (27.4 %)       | 0.29 (0.07)              | <0.0001 | 0.21 (0.07)                | 0.0017  |
| <i>ASXL1</i>            | 21 (22.1 %)       | -0.10 (0.08)             | 0.18    |                            |         |
| Splicing                | 21 (22.1 %)       | 0.15 (0.08)              | 0.05    | 0.09 (0.07)                | 0.18    |
| <i>TET2</i>             | 22 (23.2 %)       | -0.14 (0.07)             | 0.05    | -0.11 (0.07)               | 0.09    |
| <i>NPM1</i>             | 27 (28.4 %)       | -0.04 (0.07)             | 0.56    |                            |         |
| <i>JAK2/CALR</i>        | 4 (4.2 %)         | -0.28 (0.16)             | 0.08    | -0.12 (0.14)               | 0.41    |

**Supplementary Figure 7: MAC-Score predict response within mutational subgroups**

**A** Event-free survival of first-line 5-AZA/VEN AML patients stratified by above and below 0.4 of MAC-Score preselected on mutations.

**B** Patient characteristics of 95 diagnostic AML samples with retrospectively assessed factors associated with MAC-Score. Univariate linear regression was performed for every parameter. Multivariate logistic regression was performed on parameters with  $p < 0.1$  in the univariate analysis. MAC-Score: Mediators of Apoptosis Combinatorial Score, ROC: Receiver operating characteristic
