# Supplementary material for: Combinatorial BCL2 Family Expression in Acute Myeloid Leukemia Stem Cells Predicts Clinical Response to Azacitidine/Venetoclax
Source: Oxford University Press journal article supplement (doi:10.1158/2159-8290.cd-22-0939), 2023-03-09
Supplement: cd-22-0939_supplementary_tables_1-7_suppst1.xlsx [file cd-22-0939_supplementary_tables_1-7_suppst1.xlsx]

## Sheet: Supplemental Table 1a
Supplemental Table 1a. Cell line statification and response to 5-AZA/VEN
Cell Line	FAB of original patient	Class	(log CD64 MFI)	log(IC50 nM)	log(A.U.C.)
KG1a	M1	Prim	2	0.6805	2.16137
ME-1	M4	Prim	2.01703	0.6949	1.41027
GDM1	M4	Prim	2.42813	2.812	3.15806
MOLM13	M5a	Prim	2.54283	0.1549	2.2403
SKNO1	M2	Prim	2.63649	3.13	3.22531
Kasumi6	M2	Prim	2.79309	0.6928	1.57276
Kasumi1	M2	Prim	2.82737	0.7406	1.7801
GF-D8	M1	Prim	2.9284	1.09	2.19811
HL60	M2	Prim	2.94151	1.669	2.54481
ML1	M4	Prim	2.96379	1.448	2.3587
ML2	M4	Prim	2.97955	1.878	2.72989
NOMO1	M5	Mono	3.57807	1.968	2.92179
OCI-AML3	M4	Mono	3.62593	3.296	3.19257
PL21	M3	Mono	3.68878	3.38	3.25479
YNH-1	M1	Mono	3.71559	3.647	3.29688
U937	M5	Mono	3.71892	3.262	3.28466
MONOMAC6	M5	Mono	3.76656	2.256	3.23147
THP1	M5	Mono	4.01957	4.668	3.35946
SKM-1	M5	Mono	4.09882	3.239	3.25455
FAB: French-American-British Classification; log: Logarithm; log MFI.: Logarithm of Mean Fluorescence Intensity; IC50: The half maximal inhibitory concentration of 5-AZA/VEN; A.U.C.: Area Under the Curve for 5-AZA/VEN

## Sheet: Supplemental Table 1b
Supplemental Table 1b. TP53 mutations and CNAs in cell lines
Cell Line	TP53 alteration type	Mutation (Amino Acid)	Mutation (CDS)	Cancer Driver Variant	Effect	Total copy Number	CNA call
KG1a	Splice Variant	p.?	c.672+1G>A	Yes	ess_splice
KG1a	CNA					1	Loss
ME-1	CNA					1	Loss
GDM1	wt
MOLM13	wt
SKNO1	mut
Kasumi6	SNP	p.Y234D	c.700T>G	Yes	missense
Kasumi6	CNA					1	Loss
Kasumi1	SNP	p.R248Q	c.743G>A	Yes	missense
Kasumi1	CNA					1	Loss
GF-D8	N/A
HL60	CNA					1	Deletion
ML1	N/A
ML2	wt
NOMO1	Frameshift	p.C242fs*5	c.723delC	Yes	frameshift
OCI-AML3	wt
PL21	Frameshift	p.P36fs*8	c.107delC	Yes	frameshift
YNH-1	N/A
U937	Splice Variant	p.?	c.559+1G>A	Yes	ess_splice
MONOMAC6	SNP	p.R273H	c.818G>A	Yes	missense
MONOMAC6	CNA					1	Loss
THP1	Frameshift	p.R174fs*3	c.520_545del26	Yes	frameshift
THP1	CNA					1	Loss
SKM-1	SNP	p.R248Q	c.743G>A	Yes	missense
SKM-1	CNA					1	Loss
CNA: Copy Number Alteration, SNP: Small Nuclear Polymorphorism, wt: Wildtype, mut: Mutated; CDS: Coding DNA sequence
Data obtained from https://cellmodelpassports.sanger.ac.uk/

## Sheet: Supplemental Table 2
Supplemental Table 2. Summary of patient data in Figure 1C
Patient ID	Exp. Sample ID Table 4/5/7	Refratory	Age at diagnosis (years)	Sex	MDS/MPN	ELN2017 "good prognosis"	ELN2017 "intermediate prognosis"	ELN2017 "poor prognosis"	complex abberant	Previous 5-AZA	NPM1	FLT3	RUNX1	KRAS/NRAS/PTPN11	ASXL1	Tp53	IDH	DNMT3a	TET2	Differentiation state: <50% CD64+ blasts (Primitive)	Differentiation state: >50% CD64+ blasts (Monocytic)	Karyotype	Mutations	Total 5-AZA/VEN cycles	Current State	Diagnosis: BM blasts	Diagnosis: PB Leukocyte counts	Previous therapy details	HMA	%CD64 of blast	%CD34+ blast
1	-	yes	71	m	no	0	0	1	yes	no	no	no	yes	yes	no	yes	no	no	no	no	yes	44~59,XY,i(1)(p10)[20],add(1)(q10)[5],der(1)t(1;2)(q21;p13)[25],add(3)(p21)[25],del(5)(q22q33)[22], +6[3],+7[6],+8[5],add(9)(p13)[3],del(12)(p12)[24],-13[24],-14[21], 15[24], der(16)t(3;16) (p21;q23)[24], +19[3], +20[5], +21[14], -22[24], mar1x2~3[22], mar2x1~2[13][cp25]	TP53 (Exon 4+10), NRAS, RUNX1	2	Refractory	0.23	L:25,47/nl	no	5-AZA	11	33
2	-	yes	62	m	yes	0	0	1	yes	yes	no	no	no	no	no	no	no	no	no	no	yes	46, XY, inv (3) (q21, q26.2), del (6) (q25) [19] / 45, XY, -7 [4] / 46, XY	EVI 1, ZRSR2	1	Refractory	0.23	L:1,29/nl	2 cycles 5-Aza mono for MDS	5-AZA	67	30
4	-	yes	72	m	yes	0	0	1	no	yes	no	no	no	no	yes	no	no	no	yes	yes	no	46,XY,-7,+8	JAK2(V617F), ASXL1, EZH2, TET2	1	Refractory	0.56	L: 8,54/nl	1 cycle 5-Aza mono for MDS	5-AZA	4	53
5	-	yes	71	m	yes	0	0	1	yes	no	no	no	no	no	no	yes	no	no	no	yes	no	54~60,X,+Y[3],+1[2],+4[2],+5[2],+8x2[2],+9[2],+11[4],+13[2],+15[2],+18[3]-19[2],add(19)(p13)[2],+20[3],+21[3],+22[3],+1-3mar[4][cp4]/46,XY[5]	TP53	1	Refractory	0.8	L:3,92/nl	no	5-AZA	30	17
7	-	yes	79	m	yes	0	0	1	no	yes	no	no	yes	yes	yes	no	no	no	no	yes	no	46,XY	ASXL1, STAG2, KRAS, RUNX1	1	Refractory	0.2	L: 11,35/nl	3 cycles 5-Aza mono for MDS	5-AZA	0.6	79
9	-	yes	76	m	yes	0	0	1	yes	no	no	no	yes	no	no	no	no	yes	yes	yes	no	47,XYY?c,del(7)(q22)[23]/48,sl,+8[2].	RUNX1	1	Refractory	0.56	L: 29,39/nl; 40% Blast pB	no	5-AZA	15	73
13	2	yes	73	m	yes	0	0	1	yes	no	no	no	no	no	no	yes	no	no	no	yes	no	43~44,XY,add(1)(p34)[15],add(3)(q29)(20),-5[20],add(9)(q34)[20],-11[20],-16[9],-17[20], add(19)(q13.4)[13],add(21)(p13.3)[20],+mar[20][cp20]	DNMT3A, TET2, TP53,	2	Refractory	0.62	L: 3,2/nl	no	5-AZA	1	14
16	-	no	76	f	no	1	0	0	no	no	yes	yes	no	no	no	no	no	yes	no	yes	no	46,XX	NPM1, FLT3-ITD (0.25)	1	withdrawal of concent	0.5	L: 23,6/nl	no	5-AZA	8	16
17	-	no	59	m	no	1	0	0	no	no	yes	yes	no	no	no	no	no	no	no	no	yes	46, XY	DNMT3A , WT1 , NPM1 , FLT3-ITD (Ratio 0,36)	27	no RELAPSE	0.4	L: 60/nl	no	5-AZA	39	32
18	-	no	73	m	yes	0	0	1	no	no	no	no	yes	no	no	no	no	no	no	yes	no	46,XY	RUNX1, SF3B1	14	Relapse	0.4	L:21/nl	no	5-AZA	17	51
19	37	no	58	f	no	1	0	0	no	no	yes	yes	no	no	no	no	yes	no	no	yes	no	46, XX	NPM1, IDH2, FLT3-ITD(Ratio 0,15)	15	no RELAPSE	0.79	L: 4,5/nl	no	5-AZA	15	0.2
20	-	no	78	m	no	1	0	0	yes	no	no	no	no	no	no	no	no	no	no	yes	no	45,XY,der(6)t(6;8)(p21.3;q21),-7,der(8)t(8;21)(q21;q22),add(21)(q22)[25],	CKIT	11	Relapse	0.63	L: 24,45 /nl	no	5-AZA	26	95
21	-	no	79	m	no	0	0	1	yes	no	no	no	no	no	no	yes	no	no	no	yes	no	FISH: Deletions: 5q31-5q32-33 (83%), 7q22/7q36 (79%),16q22 (80%); Trisomie 8q21 (79%)	TP53	6	Relapse	0.3	L:18,71	no	5-AZA	1	83
22	-	no	73	f	no	0	0	1	yes	yes	no	no	no	no	no	no	yes	no	no	yes	no	-	IDH1	28	no RELAPSE	0.49	L:13,69/nl	no	5-AZA	3	62
23	-	no	76	m	no	0	0	1	no	no	no	no	no	no	no	no	no	yes	yes	no	yes	46,XY	TET2, DNMT3A, TP53, NPM1	9	no RELAPSE	0.61	L:55/nl	no	5-AZA	98	1
28	88	no	80	f	no	1	0	0	no	no	yes	yes	no	no	no	no	yes	no	no	yes	no	46, XX	NPM1, FLT3-ITD (0,17), IDH2	22	Relapse	0.55	L: 22,83/nl	2 cycles 5-Aza mono	5-AZA	5	1
29	-	no	77	f	no	0	0	1	no	no	no	no	yes	no	no	no	yes	yes	no	yes	no	46,XX,del(5)(q12q33) [3]/46,XX [22]	IDH2, RUNX1, DNMT3A	23	no RELAPSE	0.31	L:2.62nl	no	5-AZA	8	66
30	90	no	71	f	no	0	1	0	no	no	no	no	no	yes	yes	no	no	no	no	no	yes	46,XX,t(9;11)(p22;q23)	ASXL1, Kras	4	Relapse	0.6	L: 133/nl	no	5-AZA	99	1
34	-	no	77	m	no	1	0	0	no	no	yes	no	no	yes	no	no	no	no	yes	no	yes	46,XY,add(8)(q24)[2]/46,XY[25]	KRAS, TET2, NPM1	4	Relapse	0.79	L: 12,09/nl	no	5-AZA	99	1
35	-	no	79	m	no	0	0	1	yes	no	no	no	no	no	no	yes	no	no	yes	yes	no	44,XY,del(5)(q31q34),-6,-17,tas(17;22)(q25;p11),-18,add(19q13),+mar1~3[24]/46,XY[1]	TP53,TET2	8	Relapse	0.51	L:2,2/nl	no	5-AZA	3	73
36	-	yes	59	f	no	1	0	0	no	no	yes	no	no	no	no	no	no	yes	no	no	yes	46,XX	FLT3-ITD (0,16), NPM1, DNMT3A	3	Relapse	0.7	L:30,4/nl	no	5-AZA	82	0
38	-	yes	59	f	no	0	0	1	no	no	no	no	no	no	no	no	no	no	no	no	yes	46,XX,t(6;11)(q27;q23)/46,XX	-	2	Relapse	0.87	L:104/nl	no	5-AZA	99	0
39	17	no	71	m	no	0	0	1	no	no	no	no	no	no	yes	no	no	no	no	no	yes	46,XY,t(6;11)(q27;q23)[15]/46,XY[10]	ASXL1	4	Relapse	0.22	L:163/nl	no	5-AZA	51	62
43	-	no	58	m	no	0	1	0	no	yes	no	no	no	no	no	no	no	no	no	yes	no	46,XY	SF3B1	8	Relapse	0.22	L: 3,59	no	Decitabin	12	6
44	8	no	78	f	no	0	0	1	yes	no	no	no	yes	no	no	yes	no	yes	no	yes	no	45,XX,add(4)(p15),del(5)(q22q35),add(7)(q21),+8,dic(9;12)(p13;p13),-11,-15,add(19)(q13.4), +r(?11)[15]/45,XX,sl,-dic(9;12)(p13;p13),add(9)(p13),-12[5]	TP53,RUNX1, DNMT3a	4	Relapse	0.58	L:13,56	no	5-AZA	3	54
45	28	no	44	f	yes	0	1	0	no	yes	no	no	no	no	no	no	no	no	no	yes	no	46,XX	CEBPA,WT1	1	Refractory	0.71	L:11,5/nl	5 cycles 5-Aza mono for MDS	5-AZA	16	39
50	-	yes	63	f	no	0	1	0	no	no	no	no	no	no	no	no	no	no	no	yes	no	46,XX,del(6)(q24),add(16)(p11.2)[26]	-	5	no relapse, dead by infection	0.3	L: 6,31/nl	no	5-AZA	0.9	74
58	61	no	59	m	no	0	0	1	no	no	no	no	yes	no	no	no	yes	no	no	yes	no	46,XY	RUNX1,SRSF1,IDH2	2	Relapse	0.79	L: 35,71/nl	no	5-AZA	1	95
59	65	no	77	f	no	0	0	1	no	no	no	no	yes	yes	no	no	no	no	no	yes	no	47, XX, +8	NRAS, RUNX1	8	no RELAPSE	0.28	L:3.12nl	no	5-AZA	0.3	79
60	67	no	81	m	yes	0	0	1	no	no	no	no	no	no	yes	no	no	no	no	yes	no	46,XY	U2AF1, ASXL1, CEBPA	2	no RELAPSE	30-40%	L:38/nl	no	5-AZA	0.9	77
61	-	no	71	m	no	0	1	0	no	no	no	no	no	no	no	no	no	no	no	yes	no	46,XY	-	9	no RELAPSE	0.27	L:1,19/nl	no	5-AZA	1	90
62	45	no	83	m	no	0	0	1	yes	no	no	no	yes	no	no	no	yes	no	yes	yes	no	47,XY,+13[5]/48,sl,+8[15]	RUNX1, SRSF1, IDH1, TET2,	3	Relapse	0.65	L: 3,02/nl	no	5-AZA	0.5	96
63	29	yes	61	m	yes	0	0	1	yes	no	no	no	yes	no	no	no	yes	no	no	yes	no	47,XY,+8,add(12)(p13),-15,add(17)(p12),+21[7]/46,XY[13]	JAK2 (V617F), IDH2, SRSF2	0.5	Relapse	0.95	L:51,5/nl	no	5-AZA	2	7
64	-	no	70	m	yes	0	1	0	no	no	no	no	no	no	no	no	no	yes	no	yes	no	46,XY	DNMT3a	11	no RELAPSE	25-30%	L: 1,69/nl	no	5-AZA	0.5	94
66	10	yes	60	m	no	0	0	1	yes	no	no	no	no	no	no	no	no	no	no	yes	no	46,XY,dup(1)(p13p36),del(3)(q23),del(5)(q13q33)[9]/45,sl,-17[11]	NF1	0.5	Relapse	0.4	L:5,98/nl	no	5-AZA	4	65
67	-	no	65	m	no	0	0	1	no	no	no	no	no	no	yes	no	yes	no	no	yes	no	46,XY	ASXL1, EZH2, ZRSR2, IDH1	8	Relapse	0.27	L:2.06nl	no	5-AZA	2	2
68	59	no	62	m	no	1	0	0	no	no	yes	no	no	yes	no	no	no	yes	no	yes	no	46,XY	DNMT3A, NPM1, KRAS	8	Relapse	0.38	L:2,91	no	5-AZA	0.2	0.3
69	57	no	79	f	no	1	0	0	no	no	yes	no	yes	no	no	no	yes	no	no	yes	no	46,XX	RUNX1, SRSF2, NPM1 ,IDH2	2	ltfu	0.81	L:65,76/nl	no	5-AZA	6	0
70	-	no	79	m	yes	0	0	1	yes	no	no	no	no	no	no	no	no	no	yes	yes	no	47,XY,+13[5]/46,sl,-Y[6]/46,XY[9]	TET2	2	ltfu	-	L:140 67% Blast pB	no	5-AZA	6	86
71	92	no	72	m	no	0	1	0	no	no	no	no	no	no	no	no	no	no	no	yes	no	46, XX	-	3 --> alloTX	no RELAPSE, allo TX	0.25	L:1.72nl	no	5-AZA	3	84
72	-	no	74	m	yes	0	0	1	no	no	no	no	yes	no	yes	no	no	no	no	yes	no	46, XY	ASXL1, RUNX1, EZH2, SRSF2	3.5	no relapse, dead by infection	0.23	L:6,16	no	5-AZA	1	45
73	-	no	73	f	no	0	1	0	no	no	no	no	no	no	no	no	yes	no	no	yes	no	46,XX	IDH2	1	ltfu	0.2	L:33/nl pB:21%	no	5-AZA	0.1	52
74	93	no	79	m	yes	1	0	0	no	no	yes	no	no	no	no	no	yes	no	yes	yes	no	45,X,-Y	IDH1, Tet2, DNMT3a, NMP1	1	ltfu	0.8	L:74/nl	no	5-AZA	7	90
75	94	no	67	m	no	0	1	0	no	no	no	no	no	no	no	no	yes	no	no	no	yes	46,XY	IDH2	6	dead by secondary malignancy	0.27	L:2,72/nl	no	5-AZA	1.4	35
76	-	no	62	f	no	0	1	0	no	no	no	yes	no	no	no	no	no	yes	no	yes	no	46,XX	FLT3-ITD (0,3), DNMT3a	3	ltfu	-	L: 42,64/nl; 44%Blast pB	no	5-AZA	13	36
77	-	no	65	m	yes	0	0	1	no	no	no	no	no	no	yes	no	yes	no	no	yes	no	45,XY,-7, ETV6 deletion	ASXL1,IDH2,SETBP1	3 --> alloTX	no RELAPSE, allo TX	0.61	L: 1,45/nl	no	5-AZA	20	84
78	-	no	66	m	no	0	0	1	yes	no	no	no	no	yes	no	no	no	no	no	yes	no	47, XY, +8[16]/58,XY,+Y,+2,+8,+8,+8,+8,+13,+15,+15,+19,+20,+22	NRAS	3 --> alloTX	Relapse after allo	0.2	L: 16,59/nl	no	5-AZA	3	9
79	54	no	64	m	no	0	0	1	no	no	no	no	no	yes	no	no	no	no	no	yes	no	46,XY,del5q(q31q35)	NRAS	3 --> alloTX	no RELAPSE, allo TX	0.67	L: 87/nl	no	5-AZA	4	52
80	-	yes	78	m	no	0	1	0	no	no	no	no	no	no	no	no	no	no	no	yes	no	46,XY	-	2	Refractory	0.37	L: 0.68/nl	no	5-AZA	3	86
82	95	no	65	f	no	0	1	0	no	no	no	no	no	no	no	no	yes	yes	no	yes	no	46,XX	IDH1, DNMT3A	3 --> alloTX	Relapse after allo	0.88	L: 1,21/nl	no	5-AZA	1.5	1
83	52	no	75	f	no	1	0	0	no	no	yes	yes	no	no	no	no	yes	no	no	yes	no	46,XX	FLT3-TKD, IDH2, NPM1	16	Relapse	0.87	L: 139/nl	no	5-AZA	23	0
84	51	no	71	m	no	1	0	0	no	no	yes	no	no	yes	no	no	no	no	no	no	yes	46,XY	NPM1,NRAS	2	ltfu	0.51	L: 140/nl	no	Decitabin	72	0
85	3	yes	64	m	yes	0	0	1	yes	yes	no	no	no	no	no	yes	no	no	no	yes	no	46, XY, del(5)(q31q33), del(13)(q12q14), del(21)(q22)	JAK2, TP53, TET2	1	Refractory	0.88	L: 14/nl	no	5-AZA	8	63
86	-	no	79	m	yes	0	1	0	no	no	no	no	no	no	no	no	no	no	no	yes	no	46,XY	-	13	Relapse	0.53	L: 1,07	no	5-AZA	1.3	90
Sex m: Male; f: female
MDS/MPN: Myelodysplastic Syndrome/Myeloproliferative Neoplasm
ELN: European Leukemia Network AML Risk Stratification

## Sheet: Supplemental Table 3a
Supplemental Table 3a. Differential gene expression in Prim-AML LSC-like vs Mature
SYMBOL	baseMean	log2FoldChange	lfcSE	stat	pvalue	padj
RP11.44F14.1	28.3259	-26.1226	0.861849	-30.3099	8.48074e-202	1.86856e-197
CLEC17A	15.2808	-23.789	1.05372	-22.5763	7.41289e-113	8.16641e-109
S100A8	8344.08	-12.2243	0.622146	-19.6486	5.93956e-86	4.36221e-82
IFI30	516.743	-8.5758	0.4449	-19.2758	8.57852e-83	4.72526e-79
PSAP	30707.1	-4.47087	0.236285	-18.9215	7.58472e-80	3.34228e-76
S100A9	12484.9	-11.2237	0.599414	-18.7244	3.13036e-78	1.14952e-74
PILRA	838.769	-6.64093	0.366681	-18.1109	2.61402e-73	8.22782e-70
FCN1	8486.16	-11.5433	0.641669	-17.9895	2.35484e-72	6.48552e-69
C5AR1	1698.5	-9.26482	0.517522	-17.9023	1.13185e-71	2.77089e-68
LGALS3	1833.41	-7.86353	0.44493	-17.6736	6.69268e-70	1.4746e-66
SLC11A1	1321.6	-7.70073	0.45559	-16.9028	4.29235e-64	8.59758e-61
FGR	2671.91	-6.08245	0.36039	-16.8774	6.59583e-64	1.21105e-60
CTSS	9611.59	-4.95424	0.313311	-15.8126	2.5487e-56	4.31965e-53
FGL2	1440.03	-7.17437	0.456978	-15.6996	1.52258e-55	2.39622e-52
MAFB	1802.27	-10.1301	0.646241	-15.6754	2.2275e-55	3.27189e-52
CD14	2249.53	-10.6089	0.680324	-15.594	8.00251e-55	1.102e-51
RP11.290F20.3	675.226	-9.16024	0.58856	-15.5638	1.2822e-54	1.66181e-51
IL1RN	488.547	-9.76399	0.629266	-15.5165	2.68365e-54	3.28494e-51
HMOX1	675.196	-8.037	0.524287	-15.3294	4.86579e-53	5.64252e-50
CTSB	5566.74	-3.20563	0.210498	-15.2288	2.27895e-52	2.5106e-49
HK3	770.875	-11.1518	0.741327	-15.043	3.83969e-51	4.02857e-48
S100A12	719.918	-12.1509	0.818064	-14.8532	6.63137e-50	6.64132e-47
CCR1	603.338	-8.40604	0.573882	-14.6477	1.3939e-48	1.3353e-45
VCAN	3897.03	-9.83796	0.674752	-14.5801	3.75898e-48	3.4509e-45
LRRC25	1377.49	-7.05118	0.486961	-14.48	1.62182e-47	1.42934e-44
TREX1	390.331	-2.39489	0.16969	-14.1134	3.14285e-45	2.66332e-42
ATP6V0D1	1329.95	-2.33705	0.166496	-14.0367	9.29634e-45	7.58616e-42
CD300E	1703.79	-11.0473	0.789113	-13.9997	1.56525e-44	1.23169e-41
MPEG1	2278.64	-11.3069	0.815008	-13.8733	9.19013e-44	6.98228e-41
LINC00877	286.707	-5.9163	0.427202	-13.8489	1.29101e-43	9.48162e-41
LYZ	30582.9	-8.66642	0.627224	-13.8171	2.00988e-43	1.42851e-40
PLBD1	1337.6	-11.5418	0.839012	-13.7564	4.65956e-43	3.20825e-40
APOBEC3A	1081.26	-12.3136	0.901556	-13.6582	1.8038e-42	1.20434e-39
STX11	1657.62	-4.48546	0.336379	-13.3345	1.45783e-40	9.44717e-38
G0S2	1315.15	-10.5827	0.79883	-13.2478	4.64751e-40	2.92568e-37
WARS	4041.71	-3.73004	0.285714	-13.0551	5.94135e-39	3.63627e-36
UBXN11	1040.51	-3.1186	0.239794	-13.0053	1.14144e-38	6.79711e-36
GPBAR1	259.101	-7.86271	0.604925	-12.9978	1.25864e-38	7.29779e-36
SIRPB1	593.904	-8.83779	0.680855	-12.9804	1.57996e-38	8.92597e-36
LILRA6	337.859	-7.20723	0.558664	-12.9008	4.45261e-38	2.45261e-35
SIGLEC9	248.675	-8.87188	0.702554	-12.628	1.47922e-36	7.94917e-34
TYMP	1361.29	-5.85414	0.465709	-12.5704	3.07233e-36	1.61173e-33
FKBP15	510.881	-2.25993	0.180906	-12.4923	8.22533e-36	4.21462e-33
LILRA5	781.827	-8.98152	0.720544	-12.4649	1.15988e-35	5.80809e-33
C1QA	507.789	-10.4838	0.845883	-12.3939	2.81825e-35	1.37988e-32
MARCO	139.203	-12.2852	0.99355	-12.365	4.04401e-35	1.937e-32
HBEGF	1008.07	-5.33518	0.431821	-12.3551	4.57365e-35	2.14407e-32
CTD.2006K23.1	60.2773	-9.72215	0.789126	-12.3202	7.05593e-35	3.23882e-32
NINJ1	1580.21	-4.18992	0.341377	-12.2736	1.2553e-34	5.64448e-32
VNN3	86.0486	-10.5721	0.861848	-12.2668	1.3656e-34	6.01764e-32
TBC1D8	270.785	-4.09832	0.334665	-12.246	1.76443e-34	7.47608e-32
IFNGR2	963.204	-3.27574	0.267491	-12.2462	1.76062e-34	7.47608e-32
OLR1	92.4011	-9.42592	0.770917	-12.2269	2.23325e-34	9.284e-32
SCIMP	404.446	-7.16508	0.587267	-12.2007	3.08093e-34	1.25708e-31
LGALS2	344.28	-9.03826	0.740929	-12.1985	3.16424e-34	1.2676e-31
TNFAIP6	201.845	-8.19736	0.672352	-12.1921	3.42605e-34	1.34797e-31
LRP1	465.331	-8.18137	0.672644	-12.163	4.89249e-34	1.89116e-31
CTSH	1137.07	-6.29556	0.519963	-12.1077	9.61454e-34	3.65236e-31
ASGR2	161.231	-9.48408	0.784252	-12.0932	1.14797e-33	4.28697e-31
EMR3	95.5268	-10.1817	0.842377	-12.0868	1.24004e-33	4.55364e-31
ITPK1	378.883	-2.43348	0.201858	-12.0554	1.81678e-33	6.56215e-31
HEXB	1452.43	-2.43619	0.203639	-11.9633	5.53211e-33	1.93475e-30
FPR1	883.443	-8.65761	0.72363	-11.9641	5.47611e-33	1.93475e-30
LILRA3	536.781	-9.18235	0.769113	-11.9389	7.42148e-33	2.55496e-30
NCF2	1833.04	-5.70109	0.477829	-11.9312	8.13549e-33	2.75768e-30
CLEC4E	167.196	-11.1144	0.936906	-11.8629	1.84447e-32	6.15747e-30
NCF1	432.84	-7.2983	0.616297	-11.8422	2.36237e-32	7.76866e-30
MTMR11	123.055	-5.86773	0.498951	-11.7601	6.2643e-32	2.02972e-29
LYST	1550.48	-3.44047	0.294	-11.7023	1.24065e-31	3.96163e-29
NAMPT	2506.37	-4.07187	0.348079	-11.6982	1.30261e-31	4.10006e-29
GRB2	1781.2	-1.71861	0.147152	-11.6791	1.62954e-31	5.05686e-29
PLAUR	2949.44	-4.39108	0.376119	-11.6747	1.71643e-31	5.25251e-29
FTLP3	75.3203	-2.67545	0.230095	-11.6276	2.98397e-31	9.00626e-29
ARHGEF10L	153.129	-10.5284	0.905775	-11.6236	3.12713e-31	9.18667e-29
CD300C	462.447	-5.57611	0.479679	-11.6247	3.08722e-31	9.18667e-29
SIGLEC7	96.2783	-9.53744	0.822693	-11.593	4.47394e-31	1.29703e-28
NADK	577.349	-3.11101	0.268675	-11.5791	5.26184e-31	1.50564e-28
CARD16	515.1	-2.86606	0.248081	-11.5529	7.13607e-31	2.01576e-28
MS4A7	1641.9	-5.31208	0.460571	-11.5337	8.92437e-31	2.489e-28
C5AR2	40.7272	-8.49165	0.743925	-11.4147	3.53288e-30	9.72999e-28
SAMHD1	2219.72	-4.40402	0.38617	-11.4043	3.97739e-30	1.0819e-27
CDK6	2476.51	2.84609	0.249604	11.4024	4.06782e-30	1.093e-27
SECTM1	181.786	-7.35748	0.647464	-11.3635	6.35279e-30	1.6864e-27
MGAT1	1983.92	-2.65423	0.234228	-11.3318	9.13064e-30	2.39495e-27
TNFRSF1B	3246.91	-4.64672	0.410214	-11.3276	9.58453e-30	2.48442e-27
FTL	43732.2	-2.69104	0.237749	-11.3188	1.0586e-29	2.71212e-27
PTPRCAP	317.743	4.00806	0.356698	11.2365	2.69722e-29	6.83078e-27
POR	337.651	-2.00548	0.178803	-11.2161	3.39803e-29	8.50782e-27
CDA	248.221	-7.18105	0.642244	-11.1812	5.0413e-29	1.24803e-26
LINC00528	247.39	-3.88721	0.348226	-11.1629	6.19435e-29	1.51645e-26
AGBL5	135.585	2.12253	0.190694	11.1306	8.90386e-29	2.15581e-26
NPC2	1361.47	-2.50221	0.225311	-11.1056	1.17853e-28	2.82246e-26
GRN	6612.83	-4.08657	0.368285	-11.0962	1.30897e-28	3.10113e-26
RELT	498.041	-3.18104	0.287751	-11.0548	2.07711e-28	4.81738e-26
LILRB2	1225.23	-5.74933	0.520057	-11.0552	2.0685e-28	4.81738e-26
GPR35	173.187	-4.65683	0.421424	-11.0502	2.18651e-28	5.01826e-26
ZEB2.AS1	62.7417	-3.97847	0.360097	-11.0483	2.23318e-28	5.07255e-26
OAZ1	4337.6	-1.67865	0.152087	-11.0374	2.52244e-28	5.67111e-26
CTSD	2468.05	-3.02581	0.274198	-11.0351	2.58643e-28	5.75624e-26
MYD88	2801.63	-2.48572	0.225427	-11.0267	2.83973e-28	6.25678e-26
FOLR3	61.9814	-10.3355	0.940034	-10.9948	4.04587e-28	8.82601e-26
TCIRG1	1705.6	-2.69034	0.24476	-10.9918	4.18676e-28	9.0438e-26
P2RY13	307.429	-6.49442	0.591087	-10.9873	4.40086e-28	9.414e-26
IER3	365.256	-4.86854	0.444741	-10.9469	6.87428e-28	1.45636e-25
S100A6	3014.37	-2.91721	0.26695	-10.9279	8.47811e-28	1.77903e-25
ADAP2	235.919	-5.83632	0.535843	-10.8918	1.26064e-27	2.62035e-25
LRRK2	258.591	-7.50507	0.689955	-10.8776	1.47368e-27	3.03455e-25
RN7SL368P	60.5373	-5.04507	0.464641	-10.858	1.82732e-27	3.7279e-25
RNH1	1808.88	-2.22755	0.205233	-10.8538	1.9135e-27	3.8679e-25
IL1R2	123.671	-10.9239	1.00863	-10.8304	2.47093e-27	4.94927e-25
RBM47	417.121	-6.57907	0.612078	-10.7487	6.00759e-27	1.19248e-24
FFAR2	93.9138	-9.71419	0.904715	-10.7373	6.80108e-27	1.33793e-24
ARHGAP26	193.07	-2.93616	0.273707	-10.7274	7.57049e-27	1.47611e-24
CDC42EP3	1485.08	-4.20238	0.391819	-10.7253	7.74273e-27	1.49645e-24
SNN	644.643	-3.34865	0.313829	-10.6703	1.40166e-26	2.68546e-24
MEFV	101.522	-7.46921	0.702708	-10.6292	2.18027e-26	4.1412e-24
SLC31A2	132.299	-3.51308	0.330578	-10.6271	2.22968e-26	4.19885e-24
MAP2K1	383.179	-2.26201	0.212876	-10.6259	2.25777e-26	4.21572e-24
NUMB	1099.71	-1.6082	0.151633	-10.6059	2.79806e-26	5.18064e-24
BTNL8	3.65322	-19.5141	1.84092	-10.6002	2.97384e-26	5.46021e-24
FCER1G	4929.09	-5.02775	0.47507	-10.5832	3.56581e-26	6.49302e-24
BCL2A1	1310.07	-5.77542	0.548451	-10.5304	6.25603e-26	1.12983e-23
CAPZB	1960.04	-1.2313	0.117126	-10.5126	7.55437e-26	1.35321e-23
IFNGR1	1970.65	-2.8289	0.269119	-10.5117	7.62946e-26	1.35564e-23
SIRPD	9.92927	-6.85903	0.653415	-10.4972	8.89891e-26	1.56856e-23
LCP1	16092.9	-1.81112	0.172773	-10.4826	1.03803e-25	1.81516e-23
SYNGR2	1521.97	-1.77798	0.169806	-10.4706	1.17871e-25	2.04493e-23
MBD2	91.1652	-2.18609	0.208815	-10.469	1.19916e-25	2.06415e-23
C19orf77	254.582	4.99008	0.477204	10.4569	1.36216e-25	2.32655e-23
CD101	156.456	-8.12975	0.777768	-10.4527	1.42459e-25	2.41446e-23
KCTD12	203.1	-7.31596	0.702401	-10.4156	2.10364e-25	3.53813e-23
GPCPD1	1397.23	-2.25302	0.21682	-10.3912	2.71872e-25	4.538e-23
SLC2A6	296.656	-4.26462	0.41068	-10.3843	2.9236e-25	4.84329e-23
TMEM170B	103.174	-3.55153	0.34264	-10.3652	3.57041e-25	5.87067e-23
ADAP1	61.8003	-3.83829	0.37323	-10.284	8.32171e-25	1.35817e-22
IGSF6	585.331	-6.69047	0.651045	-10.2765	8.99287e-25	1.45691e-22
SLC43A2	416.762	-3.10576	0.302409	-10.27	9.61556e-25	1.54642e-22
TMEM120A	129.638	-2.50123	0.243827	-10.2582	1.0869e-24	1.73533e-22
CEACAM3	29.6594	-10.6629	1.03962	-10.2565	1.10601e-24	1.75314e-22
CD1D	411.906	-7.87056	0.769046	-10.2342	1.39358e-24	2.19319e-22
NMU	6.51939	19.0914	1.86782	10.2212	1.59353e-24	2.49009e-22
UNC119	374.159	-2.73915	0.268286	-10.2098	1.79234e-24	2.78103e-22
IL10RB.AS1	43.8437	-4.09105	0.400797	-10.2073	1.83921e-24	2.8338e-22
ITGB2	8406.76	-3.43099	0.336321	-10.2015	1.9518e-24	2.9864e-22
PRLR	53.7953	-9.21935	0.903901	-10.1995	1.99259e-24	3.02778e-22
CTB.61M7.2	182.683	-10.9832	1.07811	-10.1875	2.2555e-24	3.4038e-22
LUCAT1	137.757	-5.93579	0.585263	-10.1421	3.59333e-24	5.38585e-22
C9orf72	1081.74	-2.78584	0.274921	-10.1333	3.93269e-24	5.85466e-22
SLC7A7	827.134	-5.81287	0.574832	-10.1123	4.87313e-24	7.20601e-22
CYBB	2168.48	-7.06276	0.699198	-10.1012	5.45564e-24	8.0136e-22
C1QB	276.851	-11.5749	1.14671	-10.094	5.87275e-24	8.56916e-22
RASSF5	1321.03	-2.05588	0.203943	-10.0807	6.72779e-24	9.75219e-22
NFAM1	590.682	-5.44513	0.540499	-10.0743	7.1796e-24	1.03391e-21
ICAM1	1312.1	-4.36166	0.433056	-10.0718	7.35963e-24	1.05295e-21
C1QC	145.269	-10.627	1.05706	-10.0534	8.87488e-24	1.26155e-21
LILRA1	567.863	-5.42831	0.54107	-10.0325	1.09655e-23	1.54874e-21
ASAH1	3819.56	-2.44142	0.243404	-10.0303	1.12147e-23	1.57384e-21
DEF8	236.416	-2.15401	0.214886	-10.024	1.19611e-23	1.66797e-21
CTB.114C7.4	16.748	-7.9564	0.794371	-10.016	1.29666e-23	1.79681e-21
C15orf48	32.9179	-8.26618	0.825507	-10.0135	1.33011e-23	1.83165e-21
ZNF106	1206.27	-1.44108	0.144017	-10.0063	1.4297e-23	1.95656e-21
NCF1B	180.771	-6.97165	0.696916	-10.0036	1.47003e-23	1.99498e-21
CD4	1475.29	-4.03728	0.4036	-10.0032	1.47589e-23	1.99498e-21
LFNG	45.9422	-3.91655	0.391987	-9.99153	1.65992e-23	2.23007e-21
UBE2D1	835.842	-3.03585	0.30408	-9.98371	1.79629e-23	2.39864e-21
TLR2	833.3	-3.5152	0.352412	-9.97469	1.96718e-23	2.61102e-21
AC079325.6	59.5785	-9.6156	0.964229	-9.97232	2.01458e-23	2.65792e-21
FCGR2C	77.1357	-7.89307	0.791682	-9.97001	2.06216e-23	2.7045e-21
FGD2	693.661	-6.13829	0.616144	-9.96243	2.22553e-23	2.90148e-21
SPI1	1129.3	-2.71054	0.272216	-9.9573	2.34348e-23	3.03729e-21
ITGB2.AS1	267.142	-4.38704	0.440639	-9.95609	2.372e-23	3.05628e-21
CLEC4A	220.327	-5.41475	0.543956	-9.95439	2.4131e-23	3.09115e-21
MYCL	48.0381	-7.56699	0.761314	-9.93939	2.80545e-23	3.57298e-21
TNFAIP2	651.581	-3.60353	0.362766	-9.93348	2.97692e-23	3.76957e-21
IARS	990.056	2.05666	0.207352	9.91873	3.45135e-23	4.34535e-21
AP2A1	354.326	-1.66588	0.169425	-9.83253	8.15455e-23	1.02085e-20
ZNF22	303.855	2.2647	0.230381	9.83023	8.34304e-23	1.03854e-20
RARA	252.004	-2.45928	0.250388	-9.82187	9.06467e-23	1.12203e-20
AC007879.5	44.6421	-3.20269	0.32621	-9.81788	9.43077e-23	1.16083e-20
LACTB	346.317	-2.61061	0.266705	-9.78839	1.26285e-22	1.5458e-20
IL1B	4431.93	-4.48277	0.458563	-9.77568	1.43199e-22	1.74315e-20
KIT	557.01	4.69357	0.480915	9.75967	1.67693e-22	2.03009e-20
SIGLEC14	323.999	-4.58931	0.47073	-9.74935	1.85658e-22	2.23531e-20
ZNF385A	228.06	-3.61582	0.371085	-9.7439	1.95889e-22	2.34567e-20
CLEC10A	64.9651	-9.77204	1.00302	-9.74262	1.98375e-22	2.36259e-20
TSPYL4	577.389	1.7277	0.177989	9.70677	2.82124e-22	3.34195e-20
MSI2	407.328	3.26703	0.336627	9.7052	2.86525e-22	3.37594e-20
GNS	1986.99	-3.1315	0.322833	-9.70008	3.01255e-22	3.53062e-20
CPM	221.298	-6.61452	0.682205	-9.6958	3.14168e-22	3.66247e-20
C19orf35	24.6434	-3.66081	0.378007	-9.68452	3.50869e-22	4.06879e-20
CPXM1	521.897	3.34441	0.346035	9.66495	4.24824e-22	4.9006e-20
FAM178B	28.0961	23.8562	2.47762	9.62864	6.05248e-22	6.94554e-20
SEPT6	1374.72	1.92226	0.199699	9.6258	6.22234e-22	7.10346e-20
CSK	472.434	-1.78005	0.184937	-9.62519	6.25919e-22	7.1087e-20
RP11.295G20.2	39.1484	-3.56339	0.370693	-9.61278	7.06167e-22	7.97897e-20
LILRB1	407.7	-6.10179	0.635563	-9.6006	7.94804e-22	8.93466e-20
CASP5	18.1623	-7.69251	0.801524	-9.59736	8.20169e-22	9.17299e-20
ABI3	234.081	-6.80545	0.709521	-9.5916	8.67293e-22	9.65104e-20
NDUFAF6	263.211	2.07295	0.216267	9.58516	9.23106e-22	1.01992e-19
SHKBP1	1324.52	-1.54167	0.160844	-9.58486	9.25807e-22	1.01992e-19
CACNA2D3	33.8258	-7.95715	0.83204	-9.56342	1.13927e-21	1.24883e-19
ITGAX	1258.43	-4.07449	0.4263	-9.55779	1.20302e-21	1.31219e-19
RXRA	220.048	-3.8751	0.405814	-9.54898	1.30983e-21	1.42165e-19
GPR84	153.27	-6.33503	0.664046	-9.54005	1.42767e-21	1.54195e-19
RNF166	481.762	-1.98202	0.207959	-9.53084	1.56017e-21	1.67684e-19
USP3	816.761	-2.19475	0.230393	-9.52615	1.63221e-21	1.74575e-19
CD55	1876.63	-2.20249	0.231618	-9.50915	1.9223e-21	2.04609e-19
FCAR	470.288	-10.3773	1.09143	-9.50802	1.94325e-21	2.05845e-19
CNIH4	397.463	-1.98249	0.20855	-9.50607	1.97995e-21	2.07939e-19
CFP	2225.71	-3.88799	0.409005	-9.50597	1.9819e-21	2.07939e-19
NOL11	447.907	1.68637	0.177647	9.49284	2.24825e-21	2.34766e-19
ZFP36	15445.5	-2.69818	0.284257	-9.49204	2.26561e-21	2.35463e-19
NAPSB	400.122	-7.15873	0.754515	-9.48786	2.3582e-21	2.43936e-19
TFDP2	607.752	2.58893	0.272928	9.48575	2.40641e-21	2.47759e-19
NAAA	930.624	-2.72752	0.287788	-9.47755	2.60332e-21	2.66786e-19
ARAP1	993.273	-1.95229	0.206067	-9.47407	2.69142e-21	2.74537e-19
TGFBI	491.094	-7.93903	0.838322	-9.47015	2.7944e-21	2.83728e-19
ITM2A	894.033	4.40137	0.466503	9.43482	3.91662e-21	3.95848e-19
FBXL5	1864.95	-1.60137	0.170235	-9.40683	5.11335e-21	5.1444e-19
C12orf5	184.403	-3.09447	0.329093	-9.40301	5.30248e-21	5.31043e-19
RABGGTA	280.682	-1.23459	0.131542	-9.38552	6.26081e-21	6.24183e-19
TREM1	1449.15	-5.22514	0.55816	-9.36138	7.87045e-21	7.81125e-19
MSR1	146.718	-7.81287	0.835002	-9.3567	8.22631e-21	8.12782e-19
SLC6A12	17.792	-6.94886	0.744	-9.33987	9.64553e-21	9.4875e-19
BCL6	1384.09	-5.07725	0.544287	-9.32825	1.07631e-20	1.05397e-18
FAN1	91.4107	2.08556	0.223704	9.32286	1.13241e-20	1.104e-18
RBFA	97.3868	1.5105	0.162332	9.30499	1.34009e-20	1.30071e-18
SERPINA1	5542.5	-7.68703	0.82623	-9.30374	1.3559e-20	1.3072e-18
AP001053.11	72.6423	-3.47904	0.373948	-9.30353	1.35864e-20	1.3072e-18
GLT1D1	46.0099	-8.27715	0.88988	-9.30143	1.38574e-20	1.32748e-18
RP11.925D8.5	19.6239	-8.35773	0.89914	-9.29526	1.46852e-20	1.40069e-18
COTL1	3671.7	-4.4378	0.478017	-9.28378	1.63571e-20	1.55343e-18
PAICS	647.246	2.21669	0.23893	9.2776	1.73335e-20	1.63909e-18
GM2A	759.393	-2.35419	0.253781	-9.27647	1.75179e-20	1.64945e-18
LST1	1416.56	-3.44097	0.371022	-9.2743	1.78784e-20	1.67624e-18
MFSD2A	116.059	-4.41557	0.477589	-9.24555	2.34039e-20	2.17577e-18
MLX	405.22	-1.18015	0.127924	-9.22546	2.82334e-20	2.60279e-18
SERPINB2	197.284	-9.84947	1.06762	-9.22565	2.81849e-20	2.60279e-18
NAIP	86.6275	-4.79562	0.520114	-9.22033	2.96196e-20	2.7192e-18
RP11.638I2.10	30.7289	-4.30001	0.466401	-9.21956	2.98313e-20	2.72728e-18
SPIN1	470.837	1.48509	0.16113	9.21672	3.06335e-20	2.78904e-18
SLC46A2	38.4281	-8.30422	0.901364	-9.21295	3.17289e-20	2.87688e-18
PHLDA2	121.933	-5.77993	0.62745	-9.21178	3.20766e-20	2.89649e-18
DOK2	660.328	-3.70674	0.40253	-9.20862	3.30354e-20	2.97089e-18
FABP4	1.24695	-36.5198	3.97648	-9.18396	4.15535e-20	3.72174e-18
SIGLEC10	429.341	-4.44044	0.483662	-9.18087	4.2761e-20	3.81438e-18
PRELID1	450.633	-1.80792	0.197376	-9.15976	5.20141e-20	4.62107e-18
CST3	5828.07	-4.19233	0.45778	-9.15794	5.28951e-20	4.68048e-18
SNX18	160.583	-2.89889	0.316797	-9.15063	5.66009e-20	4.98835e-18
BLOC1S1	101.029	-1.57575	0.172415	-9.13931	6.28518e-20	5.51719e-18
MIR22HG	476.306	-4.05555	0.443797	-9.13832	6.34311e-20	5.54594e-18
TNPO2	97.3496	1.237	0.135647	9.11928	7.56227e-20	6.58575e-18
CES1	183.82	-10.674	1.17082	-9.11671	7.74427e-20	6.7177e-18
PRKCQ.AS1	98.2961	3.60003	0.395045	9.11295	8.0175e-20	6.92743e-18
CYP27A1	435.951	-9.57332	1.05063	-9.11197	8.09004e-20	6.96281e-18
FBP1	328.612	-5.26899	0.579222	-9.09666	9.31526e-20	7.95516e-18
ERG	350.804	3.38686	0.372309	9.09691	9.29384e-20	7.95516e-18
S100A11	2326.45	-4.3725	0.481348	-9.08387	1.0478e-19	8.91362e-18
EVI5	153.086	-2.79019	0.307206	-9.08244	1.06163e-19	8.9965e-18
DKFZP761J1410	189.389	-3.11765	0.343562	-9.07447	1.14233e-19	9.64327e-18
KIAA0125	486.618	4.60034	0.50701	9.07348	1.15279e-19	9.69441e-18
NCF1C	167.681	-6.8385	0.754141	-9.06793	1.21297e-19	1.01617e-17
MYO5C	106.27	4.89496	0.539936	9.06581	1.23679e-19	1.0322e-17
VMO1	12.2374	-7.50323	0.827772	-9.06437	1.25328e-19	1.04202e-17
FTH1P8	94.9978	-2.62137	0.289212	-9.06382	1.25965e-19	1.04338e-17
CR1	85.5997	-6.05722	0.668318	-9.06338	1.26467e-19	1.04361e-17
STRBP	280.067	2.98793	0.330729	9.03439	1.64922e-19	1.35587e-17
PLA2G6	124.318	2.30703	0.255718	9.02178	1.85051e-19	1.5157e-17
CHMP4B	66.6772	-2.51884	0.279215	-9.02115	1.86128e-19	1.51888e-17
MS4A4A	276.33	-6.48024	0.71959	-9.00546	2.1477e-19	1.74614e-17
HVCN1	198.943	-3.35021	0.372261	-8.99964	2.26466e-19	1.83446e-17
PRKCQ	170.23	3.80626	0.423949	8.97812	2.75445e-19	2.22303e-17
PLEKHO2	964.654	-2.62737	0.29308	-8.96468	3.11185e-19	2.50231e-17
ARHGAP31	131.423	-4.33894	0.484103	-8.96284	3.16413e-19	2.5351e-17
CX3CR1	821.006	-7.89478	0.881532	-8.95575	3.37428e-19	2.69368e-17
LILRB3	94.502	-3.72055	0.415664	-8.95086	3.52716e-19	2.80555e-17
ADCY7	353.965	-1.90194	0.212792	-8.93803	3.96166e-19	3.13983e-17
F5	91.8997	-8.67187	0.970566	-8.93486	4.07703e-19	3.21969e-17
VSIG4	437.769	-7.78029	0.871311	-8.9294	4.28317e-19	3.3704e-17
RASSF4	770.649	-4.03953	0.452686	-8.92346	4.51952e-19	3.53278e-17
MAST3	246.995	-2.27665	0.255133	-8.92341	4.52161e-19	3.53278e-17
BST1	532.196	-3.53352	0.396358	-8.91497	4.87939e-19	3.79886e-17
PFKFB3	1177.83	-3.39047	0.380746	-8.9048	5.34831e-19	4.14927e-17
RP11.274B18.2	13.0047	-5.76539	0.647481	-8.90434	5.37059e-19	4.15194e-17
LY96	96.1797	-4.73969	0.532635	-8.89856	5.65735e-19	4.35833e-17
NFKBIZ	8576.31	-3.27918	0.368779	-8.892	6.00182e-19	4.6076e-17
HLTF	205.144	2.55134	0.287182	8.88405	6.44674e-19	4.93198e-17
TNFRSF8	60.4876	-5.94798	0.670195	-8.875	6.9932e-19	5.33153e-17
PIK3R5	654.37	-3.20916	0.361624	-8.87428	7.03844e-19	5.34751e-17
EFCAB7	46.8751	2.53027	0.285202	8.87186	7.19339e-19	5.44646e-17
CCT2	1355.33	1.39086	0.156857	8.86707	7.50954e-19	5.64702e-17
ARRB2	1302.98	-2.3834	0.268786	-8.86726	7.49693e-19	5.64702e-17
CCR5	94.3448	-6.63846	0.750053	-8.85065	8.70084e-19	6.5206e-17
RP11.65J3.1	32.1084	-5.56036	0.628419	-8.84817	8.89665e-19	6.64475e-17
RN7SL600P	30.4331	-2.98759	0.337737	-8.84591	9.07851e-19	6.75766e-17
MCOLN1	361.351	-2.67612	0.302615	-8.8433	9.29316e-19	6.89415e-17
SLC37A2	138.896	-5.48867	0.621031	-8.838	9.74514e-19	7.20519e-17
TUBGCP4	241.42	1.83945	0.208185	8.83568	9.94929e-19	7.33153e-17
EFHD2	1486.31	-2.70795	0.306547	-8.83372	1.01246e-18	7.43587e-17
NOTCH2	703.639	-2.0552	0.233335	-8.80793	1.27477e-18	9.33124e-17
SRGAP2B	91.5499	-2.63427	0.29926	-8.80262	1.33662e-18	9.75159e-17
MIIP	310.923	-1.53388	0.174332	-8.79863	1.38495e-18	1.00709e-16
REEP5	742.296	-2.29705	0.26123	-8.79321	1.45346e-18	1.05343e-16
AP001007.1	31.6936	-5.41044	0.615662	-8.78801	1.52236e-18	1.09974e-16
PTPRE	1760.6	-2.80208	0.318973	-8.78469	1.56797e-18	1.12899e-16
SLC16A6	36.3981	-8.8695	1.01321	-8.75384	2.06206e-18	1.47991e-16
SCAI	72.1503	2.35172	0.268678	8.75296	2.07837e-18	1.48678e-16
CDCA7L	417.409	2.86343	0.327667	8.73885	2.35496e-18	1.67919e-16
SAT1	19831.3	-2.94984	0.337743	-8.73399	2.45846e-18	1.74733e-16
FCGR2B	90.7712	-7.16004	0.820172	-8.72992	2.54848e-18	1.80548e-16
CCL20	58.196	-9.62733	1.10318	-8.72691	2.61731e-18	1.84831e-16
PPP4C	898.983	-1.07221	0.122888	-8.72513	2.65876e-18	1.87158e-16
IQSEC1	202.837	-3.95514	0.453463	-8.72208	2.73141e-18	1.9166e-16
C19orf38	289.311	-4.58494	0.526505	-8.70826	3.08588e-18	2.15845e-16
FTH1	3776.18	-2.76131	0.317214	-8.70488	3.17917e-18	2.21666e-16
HDAC4	102.5	-2.42756	0.278998	-8.70099	3.28989e-18	2.28663e-16
BEND5	41.0751	2.83174	0.325598	8.69704	3.40665e-18	2.36033e-16
DARS	938.155	1.19029	0.13687	8.69653	3.42185e-18	2.36344e-16
CAPN2	1740.33	-2.71067	0.311895	-8.69097	3.59352e-18	2.47425e-16
CTSZ	127.233	-3.06043	0.352203	-8.68939	3.644e-18	2.50119e-16
LINC00936	1474.26	-2.83044	0.326436	-8.67076	4.29264e-18	2.93726e-16
CD300LB	215.553	-5.55714	0.641008	-8.66938	4.34494e-18	2.96384e-16
RP11.1149M10.2	8.98126	-6.44902	0.74413	-8.66652	4.4554e-18	3.02981e-16
PPT2	65.7712	3.0841	0.356021	8.66268	4.60783e-18	3.12382e-16
ZBTB7B	53.288	-2.96505	0.342651	-8.65326	5.00467e-18	3.38245e-16
TMSB4X	21146.4	-1.81827	0.210209	-8.64982	5.15805e-18	3.47545e-16
MTL5	109.342	2.39235	0.276777	8.64359	5.44748e-18	3.65928e-16
HP	109.152	-8.29861	0.960288	-8.64179	5.53396e-18	3.70607e-16
MPHOSPH9	353	1.42122	0.164519	8.63864	5.6886e-18	3.79809e-16
RNASE6	287.2	-5.71587	0.661958	-8.6348	5.88324e-18	3.91617e-16
RP11.58E21.3	52.9603	-4.53421	0.525336	-8.63106	6.07856e-18	4.034e-16
TOX	221.621	3.80603	0.441035	8.62977	6.14737e-18	4.06742e-16
SIGLEC16	24.5161	-6.33147	0.736249	-8.59963	7.99769e-18	5.27584e-16
NEDD9	409.697	-3.73793	0.434836	-8.59619	8.24031e-18	5.41966e-16
BRI3	88.7088	-2.75469	0.320522	-8.5944	8.36986e-18	5.48849e-16
ACAA1	612.176	-1.28791	0.150174	-8.57608	9.81634e-18	6.4179e-16
RPAP2	274.144	1.37649	0.160576	8.5722	1.01524e-17	6.61801e-16
DIRC2	119.785	-2.12187	0.247667	-8.56743	1.05819e-17	6.85741e-16
TNF	1110.92	-5.585	0.651878	-8.56756	1.05705e-17	6.85741e-16
RP3.395M20.12	20.2635	-3.84631	0.448993	-8.56654	1.06645e-17	6.87051e-16
SCO2	136.247	-2.89154	0.337534	-8.56665	1.06541e-17	6.87051e-16
FCGRT	1764.06	-4.69021	0.547543	-8.56592	1.07216e-17	6.88712e-16
GABARAP	349.012	-1.62998	0.190469	-8.55776	1.15082e-17	7.37094e-16
SLC15A3	74.1411	-5.82336	0.681422	-8.54588	1.27558e-17	8.14633e-16
MOB3A	705.468	-1.64437	0.192443	-8.54471	1.28865e-17	8.18236e-16
ISYNA1	255.261	3.06352	0.358527	8.54474	1.28831e-17	8.18236e-16
CLEC4G	17.5615	-7.59085	0.888684	-8.54168	1.32289e-17	8.37565e-16
PTK7	154.621	3.80452	0.445449	8.54086	1.33222e-17	8.41055e-16
AC008984.7	7.36932	-6.48281	0.759701	-8.53337	1.42143e-17	8.94808e-16
LMNA	4670.31	-3.04036	0.356395	-8.53088	1.45245e-17	9.11732e-16
IL10RB	409.714	-1.94154	0.227637	-8.52911	1.47477e-17	9.23115e-16
RAB24	104.759	-2.68987	0.316038	-8.51125	1.72071e-17	1.07401e-15
CTSL	429.479	-6.4032	0.752435	-8.50997	1.73977e-17	1.08283e-15
ZMYM3	173.713	1.79462	0.211409	8.48887	2.08665e-17	1.29507e-15
UPF3B	207.773	1.29683	0.152796	8.48728	2.11532e-17	1.30918e-15
PLD3	1506.39	-2.17753	0.256855	-8.47765	2.29782e-17	1.41815e-15
SIDT2	229.035	-3.03508	0.358361	-8.46932	2.46824e-17	1.51907e-15
RP4.576H24.2	7.34009	-6.66882	0.787645	-8.46678	2.52266e-17	1.54824e-15
IPO11	202.068	1.83399	0.216697	8.46337	2.59754e-17	1.58977e-15
SH3BP2	992.474	-2.14816	0.253858	-8.46207	2.62675e-17	1.59876e-15
ARPC3	2817.92	-1.12064	0.132428	-8.46222	2.62335e-17	1.59876e-15
LIPN	36.731	-6.14954	0.726802	-8.46109	2.64879e-17	1.60773e-15
AC002454.1	42.0654	4.69446	0.555248	8.4547	2.79811e-17	1.6937e-15
ACSL1	1579.02	-2.72518	0.322677	-8.44554	3.02632e-17	1.82682e-15
ANKRD36	316.772	2.08266	0.24673	8.44106	3.14469e-17	1.89308e-15
RP11.701P16.2	47.863	-4.33957	0.514382	-8.43648	3.2705e-17	1.96346e-15
MAP3K3	174.479	-2.17262	0.257616	-8.43358	3.35235e-17	2.00713e-15
FAM212A	88.8992	3.32843	0.394936	8.42776	3.52334e-17	2.10379e-15
CCDC171	73.6658	3.56446	0.423163	8.42337	3.65813e-17	2.17837e-15
CD302	222.034	-1.90899	0.226668	-8.42193	3.70321e-17	2.19927e-15
CASP6	285.373	2.32874	0.276684	8.41662	3.87497e-17	2.29509e-15
MEGF9	342.026	-3.20369	0.380969	-8.40933	4.12377e-17	2.4359e-15
RHOG	1179.22	-1.60648	0.191059	-8.40826	4.16125e-17	2.45147e-15
STXBP2	576.62	-1.7448	0.207725	-8.39958	4.48063e-17	2.63258e-15
TIMP1	2091.3	-2.549	0.303513	-8.3983	4.52985e-17	2.65442e-15
PARP1	991.276	1.76141	0.209769	8.39689	4.58462e-17	2.67939e-15
RPP40	81.7145	2.65841	0.316916	8.38838	4.92895e-17	2.873e-15
KB.1507C5.4	33.2441	-4.93286	0.588259	-8.38552	5.04999e-17	2.93579e-15
SCPEP1	2000.99	-4.16721	0.497012	-8.38452	5.09321e-17	2.95312e-15
PRKACB	871.182	2.13243	0.254668	8.3734	5.598e-17	3.23729e-15
FCER2	91.7506	-6.42072	0.766888	-8.37243	5.64402e-17	3.25536e-15
HDAC2	858.516	1.11291	0.132947	8.37106	5.71025e-17	3.28496e-15
TFEB	151.15	-3.54092	0.423107	-8.36886	5.81797e-17	3.33204e-15
GAA	863.208	-3.08002	0.368038	-8.36877	5.82233e-17	3.33204e-15
HTATSF1P2	27.6481	-2.84474	0.339956	-8.36797	5.86187e-17	3.34598e-15
MTHFR	188.566	-1.74935	0.209087	-8.36661	5.92999e-17	3.37611e-15
NOD2	425.166	-4.78124	0.571671	-8.36361	6.08287e-17	3.45422e-15
CDH23	124.327	-4.05717	0.48561	-8.35479	6.55511e-17	3.71282e-15
RIN1	74.8579	-3.63274	0.434924	-8.3526	6.67743e-17	3.7724e-15
LTA4H	1557.14	-2.20554	0.264118	-8.35059	6.79251e-17	3.82761e-15
ZBTB8A	29.713	4.02672	0.482723	8.34169	7.3235e-17	4.11629e-15
PPT1	3529.44	-2.00568	0.240466	-8.3408	7.37919e-17	4.13704e-15
CECR1	1949.4	-4.39804	0.527313	-8.34048	7.39907e-17	4.13766e-15
BCR	115.962	2.17509	0.260854	8.33834	7.53417e-17	4.20254e-15
TTYH3	325.067	-2.52715	0.303326	-8.33148	7.98413e-17	4.43787e-15
PNPLA6	444.535	-1.60383	0.192507	-8.33129	7.99634e-17	4.43787e-15
ARPC4	654.416	-1.23101	0.147789	-8.32953	8.1166e-17	4.48203e-15
ZNF574	203.106	1.89109	0.227106	8.32691	8.29812e-17	4.57081e-15
ARAP1.AS2	11.0244	-4.2133	0.506322	-8.32139	8.69407e-17	4.77257e-15
MTMR14	1002.95	-1.33733	0.160747	-8.31946	8.8362e-17	4.83097e-15
IL4I1	100.627	-5.33317	0.64142	-8.31463	9.20366e-17	5.01941e-15
ANKRD36B	229.663	1.92764	0.232053	8.3069	9.82324e-17	5.34409e-15
JUNB	7029.77	-2.62462	0.3165	-8.29264	1.10762e-16	6.01087e-15
TBC1D2	351.915	-2.56465	0.309419	-8.28858	1.14612e-16	6.20453e-15
CPPED1	1194.38	-2.56702	0.309799	-8.28608	1.17043e-16	6.32062e-15
AP2S1	398.207	-1.55822	0.188113	-8.28341	1.19702e-16	6.44837e-15
AIF1	3037.85	-2.72478	0.32914	-8.27848	1.24759e-16	6.70442e-15
AP1S2	1314.76	-2.33115	0.281695	-8.27542	1.27999e-16	6.86178e-15
CCNB1IP1	161.055	1.72238	0.208202	8.27265	1.31008e-16	6.99762e-15
PSMB3	993.974	-1.06675	0.128951	-8.27251	1.31168e-16	6.99762e-15
CD163	501.735	-7.25601	0.877218	-8.27161	1.32159e-16	7.03345e-15
CNST	911.247	1.67692	0.20308	8.25746	1.48811e-16	7.90062e-15
LILRB4	401.617	-6.62028	0.802311	-8.25151	1.56402e-16	8.28368e-15
FRAT1	28.3989	-2.53858	0.307839	-8.24646	1.63158e-16	8.62078e-15
NAMPTL	93.0478	-3.98348	0.483089	-8.24585	1.63994e-16	8.63564e-15
ALPK2	7.23115	-4.90457	0.594846	-8.24511	1.65007e-16	8.63564e-15
TOM1	840.279	-2.52971	0.306811	-8.24519	1.64898e-16	8.63564e-15
ZDHHC9	130.633	2.07233	0.251335	8.24527	1.64793e-16	8.63564e-15
PLAGL2	295.183	-1.9584	0.237541	-8.24444	1.65933e-16	8.66353e-15
POU2F2	366.575	-3.65248	0.443051	-8.24393	1.66646e-16	8.68014e-15
FAM60A	609.449	1.56296	0.189646	8.24144	1.70152e-16	8.84188e-15
HTRA2	98.0758	1.41756	0.172112	8.23622	1.77734e-16	9.21412e-15
NLRC4	91.5639	-5.51304	0.669673	-8.23243	1.83448e-16	9.48806e-15
BPI	176.093	-10.9321	1.32895	-8.2261	1.93406e-16	9.97966e-15
C1orf162	1614.17	-3.56138	0.433071	-8.22354	1.97587e-16	1.01716e-14
IL6	19.2793	-8.68274	1.05603	-8.22209	1.99985e-16	1.0271e-14
STX12	275.345	-1.3948	0.169675	-8.22043	2.02779e-16	1.03903e-14
RASGEF1B	1659.85	-2.47885	0.301631	-8.21814	2.06683e-16	1.05658e-14
FLVCR2	125.75	-4.2697	0.519638	-8.21669	2.092e-16	1.06697e-14
NFKBIA	12403.3	-2.47185	0.300881	-8.21538	2.11489e-16	1.07615e-14
ATG3	1195.96	-1.25688	0.153113	-8.2088	2.23408e-16	1.13418e-14
IMMP1L	58.3048	2.41123	0.293782	8.20755	2.25743e-16	1.1434e-14
CFL1	5864.81	-1.23889	0.151187	-8.19444	2.51763e-16	1.27227e-14
IFNAR2	331.295	-1.33862	0.163387	-8.19292	2.54954e-16	1.28545e-14
RN7SL473P	31.7463	-3.14215	0.383851	-8.18586	2.70374e-16	1.36008e-14
SMARCC1	839.694	1.10195	0.134644	8.18413	2.74268e-16	1.37653e-14
NFKB2	238.744	-3.06532	0.374798	-8.17857	2.87225e-16	1.4352e-14
SERTAD3	204.383	-2.11011	0.258005	-8.17856	2.87261e-16	1.4352e-14
SLC31A1	268.609	-2.47636	0.302957	-8.17397	2.98413e-16	1.48754e-14
SLC26A11	56.8437	-5.79728	0.709293	-8.17331	3.00034e-16	1.49225e-14
SRA1	406.326	-2.02829	0.2482	-8.17199	3.03354e-16	1.50198e-14
RAB35	223.598	-1.33489	0.163346	-8.17217	3.02893e-16	1.50198e-14
MS4A14	130.782	-4.91975	0.602495	-8.16563	3.19757e-16	1.57964e-14
MYO1F	2720.93	-2.23603	0.273874	-8.16446	3.22882e-16	1.59151e-14
TMEM176A	405.473	-6.68941	0.819778	-8.16003	3.34949e-16	1.64364e-14
USP11	675.774	1.83688	0.225249	8.15491	3.49454e-16	1.711e-14
IL31RA	15.7933	-7.27236	0.892207	-8.15097	3.61003e-16	1.75973e-14
OSM	829.416	-3.29305	0.403996	-8.1512	3.60321e-16	1.75973e-14
SMARCE1	578.095	1.02843	0.126228	8.14738	3.71891e-16	1.8088e-14
C9orf47	18.2365	-6.86201	0.842994	-8.14004	3.95143e-16	1.91766e-14
AK3	537.681	1.36489	0.167805	8.13379	4.16064e-16	2.01476e-14
NAGA	922.359	-2.64805	0.325735	-8.12948	4.31137e-16	2.08317e-14
SIRPA	382.47	-3.79947	0.467412	-8.12875	4.33737e-16	2.09115e-14
RPH3A	14.4723	-7.28188	0.896062	-8.12653	4.41756e-16	2.12515e-14
NAGK	683.499	-2.08163	0.256175	-8.12581	4.44373e-16	2.12845e-14
UPK3A	9.99736	-7.16626	0.881909	-8.12585	4.44234e-16	2.12845e-14
SRGN	7695.14	-2.55812	0.315078	-8.119	4.70032e-16	2.24647e-14
AC074289.1	86.4346	-3.67802	0.453049	-8.11836	4.72522e-16	2.25348e-14
TYROBP	2717.17	-3.33557	0.411243	-8.11095	5.02263e-16	2.39014e-14
PEA15	460.981	-2.04812	0.252743	-8.10358	5.33661e-16	2.53409e-14
RP11.38J22.6	183.967	4.47284	0.552905	8.08972	5.98018e-16	2.83358e-14
IMPDH2	640.933	1.68874	0.208874	8.08495	6.21884e-16	2.94034e-14
EBPL	209.165	2.21265	0.273853	8.0797	6.49283e-16	3.06331e-14
ACTB	70835.5	-1.52974	0.189437	-8.07522	6.73534e-16	3.17093e-14
TADA2B	29.8278	-2.41199	0.298774	-8.07296	6.86156e-16	3.22347e-14
TMEM25	73.2457	5.10408	0.632507	8.06961	7.05259e-16	3.30616e-14
SNX11	266.988	-1.19207	0.147889	-8.06055	7.59505e-16	3.5529e-14
STK10	1242.03	-1.65172	0.204924	-8.06012	7.62192e-16	3.55792e-14
FCGR1B	20.9343	-4.43902	0.551191	-8.05352	8.04471e-16	3.73943e-14
TICAM1	285.554	-2.70803	0.336545	-8.04656	8.51517e-16	3.94978e-14
CHST7	53.8135	-3.11914	0.387789	-8.04341	8.73724e-16	4.04428e-14
GRINA	785.977	-2.11033	0.262439	-8.04122	8.89469e-16	4.10853e-14
MEX3B	69.5469	3.57306	0.444579	8.03694	9.2109e-16	4.24569e-14
SOAT1	709.001	-1.87889	0.234067	-8.02715	9.97661e-16	4.57947e-14
BEST1	208.663	-3.1477	0.392127	-8.02725	9.96792e-16	4.57947e-14
TMEM176B	791.64	-6.42761	0.801165	-8.02283	1.0334e-15	4.73367e-14
SPNS2	33.9164	3.00334	0.374363	8.02253	1.0359e-15	4.73526e-14
ANKRD22	41.6612	-8.16608	1.01935	-8.01105	1.13729e-15	5.18797e-14
CREB3L4	93.0521	2.27133	0.283579	8.00951	1.15168e-15	5.24278e-14
FCGR3A	1552.94	-7.83075	0.977946	-8.00734	1.17213e-15	5.32486e-14
SLC17A9	829.161	2.12028	0.264819	8.00651	1.18009e-15	5.34997e-14
GNAI2	3307.96	-1.73506	0.216908	-7.99906	1.25375e-15	5.67226e-14
PLXNB2	1052.7	-1.8382	0.230121	-7.98798	1.37166e-15	6.193e-14
SSBP2	801.288	2.24211	0.280745	7.98631	1.39037e-15	6.26461e-14
TNFSF13	124.038	-2.32685	0.291518	-7.98186	1.4414e-15	6.48128e-14
NLRC3	121.739	3.25382	0.408222	7.97072	1.57755e-15	7.07905e-14
CSTB	826.521	-2.27145	0.285319	-7.96109	1.70535e-15	7.62148e-14
DDX1	854.174	1.51401	0.190233	7.9587	1.73857e-15	7.75423e-14
CLEC5A	93.6775	-10.7206	1.34735	-7.95682	1.76518e-15	7.85701e-14
ANXA2	3909.87	-2.79476	0.351298	-7.95553	1.78372e-15	7.92352e-14
VCAN.AS1	4.5374	-5.91828	0.744376	-7.95066	1.8552e-15	8.22447e-14
ATP6AP2	2432.64	-1.36936	0.17243	-7.94155	1.99666e-15	8.83381e-14
KLF4	1475.24	-3.46069	0.435889	-7.93939	2.03179e-15	8.97121e-14
SAMSN1	900.883	-2.52366	0.318039	-7.93507	2.10376e-15	9.27042e-14
CCL4	1398.52	-4.73308	0.596556	-7.934	2.12194e-15	9.33186e-14
LAMTOR4	649.848	-1.2768	0.160997	-7.9306	2.18097e-15	9.57237e-14
FNIP2	138.218	-2.61882	0.330291	-7.92881	2.21252e-15	9.69153e-14
TEX10	315.204	1.67246	0.211067	7.92382	2.30323e-15	1.00689e-13
RP11.453F18__B.1	66.4156	2.99611	0.378187	7.92229	2.33182e-15	1.01737e-13
RASSF2	1305.55	-2.05433	0.259633	-7.91245	2.5238e-15	1.09895e-13
C16orf70	304.725	-1.88866	0.238758	-7.91038	2.56608e-15	1.11516e-13
RP11.701P16.5	37.1955	-5.27886	0.668109	-7.90119	2.76249e-15	1.19815e-13
IER5	153.202	-2.69873	0.341991	-7.89125	2.99183e-15	1.29507e-13
ATAT1	112.726	1.61747	0.205106	7.88604	3.11921e-15	1.34756e-13
RBP7	38.8926	-8.21952	1.04276	-7.88247	3.20965e-15	1.38392e-13
ARPC1B	2472.46	-1.9331	0.245268	-7.8816	3.23213e-15	1.39089e-13
ATP8B2	32.8413	3.40958	0.433114	7.87224	3.48353e-15	1.49615e-13
FLII	1364.37	-1.08981	0.138445	-7.87181	3.4955e-15	1.49837e-13
PLEKHM1	312.882	-1.5218	0.193417	-7.868	3.60351e-15	1.54167e-13
KLHL23	59.1075	4.25471	0.540888	7.86616	3.65705e-15	1.55719e-13
HCLS1	2911.1	-1.77808	0.226034	-7.86645	3.64835e-15	1.55719e-13
CEP290	97.2538	1.87246	0.238044	7.86602	3.66099e-15	1.55719e-13
PLEC	429.574	-2.72709	0.346714	-7.86554	3.67501e-15	1.55818e-13
PICALM	514.611	-1.24795	0.158662	-7.86546	3.67746e-15	1.55818e-13
ZMYND15	20.5748	-7.43093	0.945011	-7.86333	3.74061e-15	1.5819e-13
SCMH1	195.286	2.24219	0.285299	7.85908	3.86974e-15	1.63337e-13
CEP57	499.733	1.48137	0.18857	7.85579	3.97263e-15	1.6736e-13
KIAA1586	134.442	1.97243	0.251129	7.85422	4.02264e-15	1.69143e-13
SMCO4	178.855	-3.70244	0.471776	-7.84788	4.23124e-15	1.77575e-13
PGD	2353.77	-1.43411	0.182807	-7.84495	4.3312e-15	1.81425e-13
TESPA1	309.784	3.47616	0.443182	7.84364	4.37678e-15	1.82986e-13
IQCB1	343.725	1.21836	0.155394	7.84046	4.4889e-15	1.87318e-13
SRGAP2	256.015	-2.21828	0.283381	-7.82791	4.96052e-15	2.06607e-13
CD86	909.927	-5.92711	0.757349	-7.82613	5.03118e-15	2.08771e-13
COX11	241.878	1.29608	0.165773	7.81837	5.35126e-15	2.21625e-13
TLR8	97.5363	-6.62688	0.847848	-7.81612	5.44777e-15	2.25198e-13
ARHGAP30	1471.97	-1.30362	0.166829	-7.81414	5.53416e-15	2.28341e-13
SGK1	3615.27	-3.80764	0.487549	-7.80976	5.72972e-15	2.35968e-13
FAM20C	15.7489	-4.53825	0.581444	-7.80512	5.94434e-15	2.43895e-13
TMEM9B	693.539	-1.33195	0.170649	-7.80519	5.94104e-15	2.43895e-13
RAB11FIP1	1212.24	-2.08789	0.267774	-7.7972	6.32975e-15	2.59226e-13
IPCEF1	82.7748	-5.3086	0.680889	-7.79656	6.36153e-15	2.60044e-13
PNPLA1	10.4104	-6.97778	0.895307	-7.79372	6.50643e-15	2.65474e-13
AL122127.25	53.5249	4.13398	0.530634	7.79065	6.66648e-15	2.71502e-13
TERF1	133.005	1.14022	0.146376	7.78965	6.71974e-15	2.73166e-13
TNFSF10	453.777	-3.54091	0.454778	-7.78602	6.91506e-15	2.80589e-13
RP4.684O24.5	7.04904	-6.48746	0.833658	-7.78192	7.14293e-15	2.89302e-13
ORC4	340.366	1.21081	0.155694	7.77681	7.43762e-15	3.00685e-13
KIF2A	270.302	1.42344	0.183048	7.77632	7.4667e-15	3.01307e-13
NUDCD2	330.153	1.12774	0.145192	7.76723	8.02241e-15	3.2314e-13
ATP6V1B2	1877.9	-1.5651	0.201561	-7.76489	8.17147e-15	3.27945e-13
AC068580.6	25.6274	-5.37672	0.692422	-7.76509	8.15866e-15	3.27945e-13
SAMD10	30.0814	4.1962	0.540874	7.75819	8.61498e-15	3.45116e-13
PTPN18	756.883	-1.97768	0.255142	-7.75132	9.09457e-15	3.63008e-13
ALDH5A1	80.8142	4.02689	0.519502	7.75145	9.08478e-15	3.63008e-13
CYP1B1	342.999	-7.95337	1.02695	-7.74464	9.58563e-15	3.81917e-13
SGSH	364.258	-4.97962	0.643326	-7.74043	9.90841e-15	3.94065e-13
BID	1087	-1.73312	0.22397	-7.73817	1.00855e-14	4.00384e-13
ZNF512	185.275	1.66902	0.215792	7.7344	1.03888e-14	4.11686e-13
LINC00426	50.0805	5.39919	0.698286	7.73206	1.05821e-14	4.1859e-13
C10orf54	5696.29	-2.53505	0.32797	-7.72952	1.07957e-14	4.26276e-13
STMN3	124.119	2.75212	0.356124	7.72798	1.09265e-14	4.3067e-13
YARS2	144.374	1.39113	0.18011	7.72378	1.12929e-14	4.44315e-13
TARBP1	312.057	2.16663	0.280554	7.72268	1.13908e-14	4.47369e-13
GPSM3	660.26	-1.41271	0.182944	-7.72207	1.14453e-14	4.48708e-13
CD1C	124.6	-9.26676	1.20015	-7.72132	1.15132e-14	4.5057e-13
AOAH	1607.63	-3.4602	0.448262	-7.71915	1.17107e-14	4.56677e-13
LILRP1	8.87467	-5.69539	0.737825	-7.71916	1.17102e-14	4.56677e-13
MSH2	310.627	2.89741	0.375372	7.71877	1.1746e-14	4.57244e-13
RP11.15H20.5	18.7881	3.70746	0.480599	7.71426	1.21689e-14	4.7287e-13
ARPC2	6932.47	-1.02178	0.132471	-7.71326	1.22641e-14	4.75731e-13
ZFAND5	2468.26	-1.86129	0.241414	-7.70998	1.25841e-14	4.87286e-13
EAF1	479.509	-2.29799	0.298077	-7.7094	1.26414e-14	4.88647e-13
ZNF268	121.047	1.89796	0.246232	7.70803	1.27775e-14	4.9304e-13
CAP1	5006.1	-1.16694	0.151636	-7.69565	1.40777e-14	5.42263e-13
ITGAM	761.092	-4.46958	0.582171	-7.67742	1.6232e-14	6.24153e-13
CHP1	2053.69	-1.33813	0.174431	-7.67135	1.70189e-14	6.5327e-13
ZNF121	397.958	1.60866	0.209734	7.67	1.71995e-14	6.59056e-13
CTD.2267D19.2	65.1586	-1.99203	0.259845	-7.66626	1.77088e-14	6.7739e-13
TP53BP1	256.532	1.79495	0.234372	7.65856	1.88028e-14	7.17994e-13
CASP1	1015.8	-2.5371	0.331653	-7.64988	2.01174e-14	7.66865e-13
JAZF1	117.56	-3.35632	0.438764	-7.64949	2.01771e-14	7.67809e-13
ESRRA	73.0722	-1.5489	0.202757	-7.63919	2.18585e-14	8.30359e-13
RRAS	275.553	-3.43261	0.449786	-7.63165	2.3177e-14	8.77419e-13
TNFAIP3	3425.39	-3.10412	0.40681	-7.63038	2.34056e-14	8.84555e-13
CHD1L	604.496	1.29426	0.169624	7.63015	2.34472e-14	8.84611e-13
CAMSAP2	7.13762	-6.3624	0.834303	-7.62601	2.42123e-14	9.11912e-13
SERF2	2322.5	-1.22215	0.160298	-7.62428	2.45393e-14	9.22654e-13
C19orf59	164.669	-5.80287	0.761767	-7.61765	2.58334e-14	9.69654e-13
TLR1	369.193	-2.09567	0.275141	-7.61671	2.60229e-14	9.7345e-13
ATG2A	114.405	-1.86002	0.244198	-7.61685	2.59938e-14	9.7345e-13
SPATS2	117.455	1.97159	0.258898	7.6153	2.63074e-14	9.82424e-13
SIRT2	476.494	-1.13625	0.149311	-7.60998	2.74128e-14	1.02197e-12
SDC3	9.45276	-6.89995	0.90697	-7.60769	2.79036e-14	1.03851e-12
FPR2	112.565	-7.1075	0.934448	-7.60609	2.82505e-14	1.04965e-12
MAN2B1	1067.27	-2.1013	0.276278	-7.60575	2.83266e-14	1.05071e-12
APBB3	340.501	-1.67501	0.22027	-7.60432	2.86405e-14	1.06056e-12
THEMIS2	1589.28	-2.78476	0.366238	-7.60369	2.87811e-14	1.06398e-12
AC006953.1	12.8934	-4.6522	0.61204	-7.60114	2.93526e-14	1.08148e-12
TRAPPC2	286.216	1.19366	0.157083	7.59889	2.98683e-14	1.09865e-12
ATP1A1	1412.64	-1.1074	0.145818	-7.59438	3.09274e-14	1.13571e-12
OCIAD2	189.443	3.14809	0.414819	7.58908	3.22187e-14	1.18116e-12
GUCY1A3	694.522	3.26239	0.43001	7.58678	3.27947e-14	1.20028e-12
CDKN1A	2720.34	-3.76212	0.495976	-7.58528	3.31776e-14	1.21228e-12
RRP15	132.667	1.62565	0.214333	7.58467	3.33345e-14	1.21599e-12
AP003733.1	151.21	-3.43811	0.453347	-7.58384	3.35469e-14	1.22172e-12
PLBD2	264.466	-1.78701	0.235716	-7.58121	3.42344e-14	1.24265e-12
FAM168A	79.077	-1.5473	0.204116	-7.58048	3.44266e-14	1.24757e-12
TPP1	4384.76	-1.49921	0.197865	-7.57694	3.53803e-14	1.27798e-12
SCML2	129.243	3.64207	0.480679	7.57693	3.53819e-14	1.27798e-12
C22orf29	154.033	1.6611	0.219329	7.57355	3.63173e-14	1.30962e-12
EHD4	416.946	-2.55382	0.33731	-7.57114	3.69968e-14	1.33195e-12
RP11.617D20.1	21.192	3.12021	0.412348	7.56692	3.82175e-14	1.37365e-12
RAB20	221.782	-3.9079	0.516693	-7.56328	3.93019e-14	1.41032e-12
ZDHHC7	559.275	-2.44305	0.323264	-7.55744	4.11078e-14	1.47273e-12
CCDC159	141.808	-1.42175	0.188217	-7.55378	4.22819e-14	1.51233e-12
ANKRD36C	483.641	1.65314	0.21911	7.54483	4.52872e-14	1.6172e-12
AC103828.1	4.86437	-5.6466	0.749671	-7.53209	4.99329e-14	1.77908e-12
LILRA2	773.248	-3.55991	0.47264	-7.53197	4.9982e-14	1.77908e-12
AHR	1377.87	-2.36872	0.314562	-7.53023	5.06511e-14	1.79999e-12
TGFBRAP1	304.702	1.77133	0.235449	7.52317	5.34637e-14	1.89689e-12
CCL3	930.614	-4.27522	0.568389	-7.52164	5.4092e-14	1.91609e-12
PTAFR	991.633	-4.95533	0.659063	-7.51876	5.52988e-14	1.9557e-12
RP11.327F22.1	11.8072	-3.26943	0.434902	-7.51762	5.57829e-14	1.96966e-12
ZSCAN18	125.726	2.19003	0.291648	7.50918	5.94982e-14	2.09748e-12
DHX33	45.0268	1.73298	0.230885	7.50584	6.10366e-14	2.14827e-12
MYL6B	80.4141	1.80339	0.240571	7.49628	6.56549e-14	2.30346e-12
GMIP	581.699	-1.62527	0.216915	-7.49266	6.74901e-14	2.36409e-12
GNG5	1112.91	-1.08248	0.144607	-7.48569	7.11702e-14	2.48509e-12
LYRM5	249.082	1.14505	0.153054	7.48133	7.35766e-14	2.561e-12
BCL11A	851.821	2.00177	0.268007	7.46909	8.0749e-14	2.8018e-12
TASP1	136.896	1.63247	0.218668	7.46553	8.29677e-14	2.87426e-12
NEAT1	5837.5	-2.29361	0.307344	-7.46267	8.4786e-14	2.93264e-12
MDK	206.524	4.40097	0.589775	7.46212	8.51443e-14	2.94041e-12
TARS	697.988	1.1846	0.158868	7.45652	8.88348e-14	3.06306e-12
ZNF345	79.101	2.26532	0.303839	7.45567	8.94139e-14	3.07821e-12
RP1.228H13.2	7.12346	-6.155	0.82665	-7.44571	9.64226e-14	3.31432e-12
TMSB10	4262.39	-1.94275	0.261081	-7.44117	9.98002e-14	3.42507e-12
S1PR3	74.0995	-5.94154	0.798624	-7.43972	1.00896e-13	3.4573e-12
PFDN5	1820.52	-1.15597	0.155418	-7.43781	1.0237e-13	3.50236e-12
TMEM127	620.944	-1.70024	0.228692	-7.43465	1.04843e-13	3.58141e-12
LTBR	581.112	-1.61404	0.217105	-7.43439	1.05053e-13	3.58303e-12
LINC00938	374.411	1.26381	0.170004	7.43397	1.05385e-13	3.5888e-12
LXN	159.785	2.28811	0.307903	7.43125	1.07577e-13	3.6578e-12
TOLLIP	317.296	-1.55399	0.2092	-7.42827	1.10028e-13	3.73535e-12
CCRL2	251.492	-3.19184	0.430239	-7.41878	1.18208e-13	4.00689e-12
RP11.1275H24.3	45.5877	2.76356	0.372915	7.41069	1.25643e-13	4.25235e-12
CCDC102A	8.91913	4.24504	0.57297	7.40883	1.27419e-13	4.30588e-12
TTLL5	251.604	1.05891	0.142944	7.40785	1.28364e-13	4.33117e-12
S100PBP	236.946	1.55875	0.210424	7.40764	1.28564e-13	4.33126e-12
CORO1A	2729.41	-2.03767	0.275211	-7.40401	1.32134e-13	4.44476e-12
TOR2A	262.28	-1.22411	0.165373	-7.40216	1.33985e-13	4.50015e-12
PID1	66.3636	-7.66236	1.03555	-7.39935	1.36854e-13	4.58951e-12
FAM110A	132.341	-2.31341	0.312814	-7.39549	1.40883e-13	4.71744e-12
PGAM1	356.874	-1.6191	0.218985	-7.39365	1.42847e-13	4.77595e-12
SMARCD3	129.857	-3.69071	0.499221	-7.39295	1.43608e-13	4.7941e-12
RP11.213H15.1	16.6693	-3.9003	0.527875	-7.38868	1.48296e-13	4.94312e-12
OTUD1	160.951	-3.2931	0.445807	-7.38684	1.50357e-13	5.00425e-12
RP11.486G15.2	21.5231	3.54059	0.479343	7.38633	1.50937e-13	5.00844e-12
EMILIN2	204.684	-2.20928	0.299097	-7.38651	1.50733e-13	5.00844e-12
BTBD19	97.7562	-2.28627	0.30989	-7.37768	1.61066e-13	5.33651e-12
LMAN1	398.275	1.26469	0.171511	7.37383	1.65798e-13	5.48502e-12
C12orf65	93.368	1.9779	0.26826	7.37307	1.66742e-13	5.50797e-12
KDM6B	202.318	-2.20791	0.299493	-7.37216	1.67882e-13	5.53734e-12
NAA40	141.552	1.72675	0.234302	7.36976	1.70941e-13	5.62982e-12
VASP	429.163	-1.79037	0.243117	-7.36425	1.78139e-13	5.85813e-12
CD1E	31.1774	-8.2642	1.12247	-7.36251	1.80491e-13	5.9266e-12
SEMA6B	21.3777	-5.47167	0.743526	-7.35908	1.85181e-13	6.07158e-12
AVPI1	83.2888	-2.69637	0.366492	-7.35724	1.87754e-13	6.14679e-12
ANXA2P2	16.2976	-2.50819	0.34106	-7.35408	1.92246e-13	6.28452e-12
ZNHIT6	255.696	1.45277	0.197673	7.34937	1.99148e-13	6.5005e-12
HAUS5	189.212	1.43292	0.195004	7.34816	2.00948e-13	6.54953e-12
RBMX	1613.5	1.05347	0.143376	7.34755	2.01868e-13	6.56979e-12
RGS2	9470.46	-3.07658	0.419222	-7.33878	2.15547e-13	7.00464e-12
PCBP1	531.557	-1.58761	0.216343	-7.3384	2.16169e-13	7.0145e-12
TXNRD3	43.525	3.05354	0.416172	7.33721	2.181e-13	7.04633e-12
B4GALT1	945.106	-1.91156	0.260529	-7.3372	2.18109e-13	7.04633e-12
PGM2L1	146.108	2.33916	0.318804	7.3373	2.17952e-13	7.04633e-12
SYK	2133.14	-1.29485	0.176564	-7.3336	2.24043e-13	7.22744e-12
SCLT1	206.908	-1.32228	0.180325	-7.33277	2.25444e-13	7.26201e-12
CTA.384D8.36	9.54809	-2.54278	0.346807	-7.33197	2.26792e-13	7.29476e-12
NPR3	403.852	4.87055	0.664465	7.33002	2.3011e-13	7.3907e-12
TMEM189	177.812	-1.63537	0.223173	-7.32781	2.33946e-13	7.50294e-12
CCR2	87.9995	-7.03178	0.959905	-7.32549	2.38026e-13	7.6227e-12
FOLR2	62.9586	-6.14659	0.839539	-7.3214	2.45405e-13	7.84762e-12
SYT17	9.98611	-6.81027	0.930654	-7.31773	2.52205e-13	8.05338e-12
AP003774.6	7.95865	-6.28751	0.859864	-7.31222	2.62773e-13	8.37869e-12
RP11.217B7.3	7.46144	-6.07568	0.831321	-7.30846	2.70221e-13	8.60374e-12
UNC93B1	510.239	-2.58001	0.353257	-7.30349	2.80397e-13	8.90199e-12
SLC35F6	308.583	-1.81609	0.248681	-7.30289	2.81657e-13	8.92912e-12
PPP6R1	444.023	1.74201	0.238661	7.29909	2.89715e-13	9.17139e-12
RNASEK	102.509	-1.97495	0.27069	-7.29599	2.96462e-13	9.3715e-12
AF213884.2	36.1752	-3.0049	0.412025	-7.293	3.03122e-13	9.56831e-12
ARF6	1242.28	-1.73952	0.238864	-7.28246	3.27776e-13	1.03317e-11
SLC22A4	81.2902	-2.3997	0.329597	-7.2807	3.32088e-13	1.04527e-11
CTD.2545M3.8	14.8765	-2.96893	0.407928	-7.27807	3.3862e-13	1.06431e-11
TSPO	1657.59	-1.83359	0.252027	-7.27535	3.45517e-13	1.08302e-11
SV2A	101.034	4.05793	0.557962	7.27277	3.52194e-13	1.10226e-11
ZNF43	202.327	2.29399	0.315458	7.27192	3.54412e-13	1.10763e-11
AC009951.1	215.419	-2.22932	0.306726	-7.26813	3.64499e-13	1.13754e-11
JAK2	648.005	-1.77766	0.244672	-7.26549	3.71692e-13	1.15834e-11
ZNRF1	47.0263	2.16266	0.297744	7.2635	3.77188e-13	1.17381e-11
PRDM1	212.955	-3.64041	0.501222	-7.26308	3.78381e-13	1.17586e-11
GLTP	580.674	-1.57791	0.217415	-7.25762	3.93963e-13	1.22256e-11
ZEB1.AS1	29.719	4.03645	0.556201	7.25717	3.95263e-13	1.2239e-11
ASGR1	69.4818	-3.98225	0.548739	-7.25709	3.95505e-13	1.2239e-11
DNAAF2	190.209	1.46879	0.202565	7.25096	4.13827e-13	1.2788e-11
SMPDL3A	131.768	-6.35854	0.877002	-7.25031	4.15824e-13	1.28317e-11
TRIM68	93.2934	1.90927	0.263706	7.24015	4.48199e-13	1.38114e-11
OSBPL11	264.192	-2.26357	0.312683	-7.23918	4.51414e-13	1.38911e-11
RNF13	740.454	-1.29766	0.179451	-7.23125	4.78569e-13	1.47061e-11
GNGT2	38.817	-5.93967	0.821723	-7.22831	4.89039e-13	1.50069e-11
BSPRY	126.835	3.16357	0.437895	7.22448	5.03007e-13	1.54141e-11
RP11.588K22.2	20.9807	4.38422	0.607016	7.22258	5.10095e-13	1.56096e-11
LIMK1	109.182	-1.7994	0.249212	-7.22038	5.18425e-13	1.58425e-11
MDC1	110.308	1.39653	0.193551	7.21533	5.38043e-13	1.64192e-11
ATP6V0B	1972.86	-1.44257	0.200092	-7.20955	5.61368e-13	1.71074e-11
CHMP1B	1363.73	-1.28378	0.178089	-7.20863	5.6516e-13	1.71991e-11
POLE4	279.255	-1.68429	0.233729	-7.20617	5.75461e-13	1.74885e-11
C17orf80	84.3231	2.07073	0.28741	7.20479	5.81354e-13	1.76432e-11
RAB39A	11.949	-6.75325	0.938144	-7.19852	6.08705e-13	1.84479e-11
S100A4	3912.17	-2.4805	0.345219	-7.18528	6.70674e-13	2.02499e-11
FCGR2A	1055.61	-4.18252	0.582099	-7.18524	6.70893e-13	2.02499e-11
POLR3G	17.34	3.09308	0.430477	7.18523	6.70921e-13	2.02499e-11
TAGLN	31.9945	-3.49341	0.486305	-7.18358	6.79097e-13	2.04686e-11
ANGPT1	756.186	4.35413	0.606265	7.1819	6.87478e-13	2.06929e-11
RP11.70C1.1	9.05006	-3.31702	0.461937	-7.18068	6.93641e-13	2.08499e-11
FAM49A	913.37	-2.81083	0.391594	-7.17793	7.07745e-13	2.12449e-11
SNX21	32.2156	-3.08717	0.430108	-7.17766	7.09151e-13	2.12581e-11
DENND1A	461.959	-1.62831	0.22701	-7.17286	7.34494e-13	2.19879e-11
KIF1C	32.9358	-3.02921	0.422336	-7.17253	7.3625e-13	2.20106e-11
SEMA4A	1149.08	-3.54408	0.494217	-7.1711	7.43978e-13	2.22115e-11
DNAJC18	43.6262	2.5407	0.354373	7.16956	7.52373e-13	2.24317e-11
PADI2	163.367	-5.57223	0.777462	-7.1672	7.65464e-13	2.27663e-11
RP11.750H9.5	152.423	-2.16236	0.301704	-7.16717	7.65661e-13	2.27663e-11
PI4K2A	167.16	-4.32136	0.603104	-7.1652	7.76728e-13	2.30642e-11
CKAP4	145.123	-4.96035	0.692705	-7.16084	8.01823e-13	2.37773e-11
FCGR3B	34.0172	-8.58542	1.19965	-7.15659	8.27093e-13	2.44937e-11
MRPL45P2	29.832	1.89726	0.265145	7.15556	8.33309e-13	2.46447e-11
RP11.350G8.5	19.0279	-3.3601	0.470156	-7.14677	8.88429e-13	2.62396e-11
SMAP2	1457.25	-2.00654	0.28082	-7.14529	8.98036e-13	2.6483e-11
IRAK3	814.18	-1.59609	0.223382	-7.14514	8.99073e-13	2.6483e-11
MTF1	355.963	-1.44116	0.20193	-7.13692	9.54437e-13	2.80762e-11
BCKDHB	162.756	1.78857	0.250674	7.13502	9.67738e-13	2.84296e-11
MIDN	114.941	-1.9333	0.271047	-7.13273	9.8398e-13	2.88682e-11
HIGD2A	370.564	-1.22489	0.171772	-7.13092	9.96996e-13	2.92057e-11
NACC2	59.1642	-3.12358	0.438044	-7.13076	9.98134e-13	2.92057e-11
MNDA	1411.17	-4.9054	0.688103	-7.12888	1.01188e-12	2.95688e-11
C11orf49	158.1	1.53788	0.215752	7.12802	1.01826e-12	2.97158e-11
HLA.C	6766.3	-2.07785	0.291621	-7.12518	1.03942e-12	3.02531e-11
ZCCHC6	683.494	-1.33456	0.1873	-7.12525	1.03895e-12	3.02531e-11
COMMD9	706.93	-1.2152	0.170555	-7.12496	1.04111e-12	3.02623e-11
DET1	44.963	1.77148	0.248712	7.12261	1.05906e-12	3.07434e-11
DNMT3A	220.643	1.42518	0.200154	7.1204	1.07611e-12	3.11973e-11
CTB.31N19.3	43.5038	-2.53357	0.355834	-7.1201	1.07851e-12	3.12258e-11
RP11.796E2.4	40.052	-3.54901	0.498856	-7.1143	1.12486e-12	3.25249e-11
LRRC70	82.7997	3.12788	0.439787	7.11226	1.14156e-12	3.29646e-11
P2RY2	133.74	-4.32552	0.608574	-7.10762	1.18059e-12	3.40469e-11
CLEC7A	950.379	-5.22896	0.735753	-7.10695	1.18635e-12	3.41685e-11
AKR1C3	380.61	2.94985	0.415169	7.10518	1.20169e-12	3.45651e-11
PPAT	133.294	2.2266	0.313528	7.10176	1.23182e-12	3.53856e-11
SH3YL1	72.0463	1.70314	0.240094	7.09365	1.30619e-12	3.7473e-11
TLR4	625.804	-4.69714	0.662235	-7.09286	1.31368e-12	3.7639e-11
SOCS3	1712.13	-2.57209	0.362746	-7.09061	1.33522e-12	3.82063e-11
ZNF195	225.712	1.27428	0.179722	7.09026	1.3386e-12	3.82533e-11
NLRP3	1229.71	-2.51595	0.355078	-7.08562	1.38419e-12	3.94538e-11
CD209	12.7188	-6.91099	0.976353	-7.07837	1.45857e-12	4.15202e-11
SLAMF7	142.24	-5.70761	0.80653	-7.07675	1.47571e-12	4.19539e-11
ZBTB7A	51.0924	-2.21588	0.313312	-7.07244	1.52234e-12	4.32239e-11
ZNF620	29.8346	3.29359	0.465887	7.0695	1.55492e-12	4.40921e-11
UPP1	728.515	-3.99857	0.566081	-7.0636	1.62248e-12	4.59488e-11
LRBA	289.16	1.97296	0.279327	7.06325	1.62648e-12	4.6003e-11
LEKR1	53.0039	-1.98329	0.280984	-7.05837	1.68463e-12	4.75866e-11
ZEB2	2750.16	-1.22894	0.174341	-7.04908	1.8011e-12	5.08074e-11
PFN1	4431.35	-1.15418	0.163739	-7.04891	1.80327e-12	5.08074e-11
MAST4	181.833	2.85859	0.405748	7.04525	1.85128e-12	5.20935e-11
SMC4	593.546	1.688	0.239607	7.04486	1.85643e-12	5.21717e-11
SH2B3	447.717	-1.88594	0.267778	-7.04291	1.88268e-12	5.28423e-11
RBPMS	106.15	4.63409	0.659887	7.02256	2.17846e-12	6.09885e-11
ZSCAN30	162.636	1.91501	0.272712	7.02211	2.18549e-12	6.11078e-11
AGTRAP	999.534	-3.47091	0.494343	-7.02126	2.19877e-12	6.14011e-11
TPMT	334.137	-1.13315	0.161398	-7.02085	2.20525e-12	6.1504e-11
UNG	264.005	2.26412	0.32267	7.01683	2.26955e-12	6.31377e-11
FAM49B	1698.86	-1.07953	0.153854	-7.01662	2.27294e-12	6.31522e-11
TRIM59	116.087	1.95622	0.279051	7.01026	2.37879e-12	6.60098e-11
PCSK5	32.0234	-4.41352	0.629659	-7.00937	2.39386e-12	6.63445e-11
NUCB2	1780.29	2.01073	0.286909	7.00825	2.41321e-12	6.67967e-11
NPL	277.164	-4.55352	0.650145	-7.00384	2.49032e-12	6.88446e-11
P2RX7	266.154	-2.46393	0.351816	-7.00345	2.49734e-12	6.89521e-11
PITPNM1	224.337	-2.29142	0.327234	-7.00237	2.51662e-12	6.93976e-11
ACPP	194.567	-3.6971	0.52806	-7.00129	2.5362e-12	6.98502e-11
BZW2	680.831	1.40073	0.200073	7.0011	2.53958e-12	6.9856e-11
CD68	7.95109	-5.23856	0.748321	-7.00042	2.55201e-12	7.01103e-11
FUCA1	414.234	-2.68815	0.384186	-6.997	2.61506e-12	7.17529e-11
OSGIN1	21.233	-3.64735	0.521341	-6.99609	2.63208e-12	7.21301e-11
CMSS1	107.011	2.07553	0.296732	6.99464	2.6594e-12	7.27883e-11
MEGF6	107.555	2.41123	0.344743	6.99429	2.66597e-12	7.28425e-11
RP11.925D8.3	11.3298	-7.35881	1.05213	-6.99419	2.66799e-12	7.28425e-11
AC015871.1	6.85598	-6.67308	0.954429	-6.99169	2.71591e-12	7.40591e-11
ACOT9	377.623	-1.31473	0.1881	-6.98949	2.75895e-12	7.51396e-11
ALDH18A1	411.246	2.11742	0.302983	6.98857	2.77707e-12	7.55397e-11
THBD	184.881	-4.6955	0.672108	-6.98622	2.82389e-12	7.67186e-11
SH3BGRL3	7268.2	-1.44759	0.20722	-6.98577	2.83305e-12	7.68727e-11
IGHEP2	72.5423	-2.08669	0.29873	-6.98521	2.84436e-12	7.69898e-11
APOBR	96.8822	-2.64032	0.37798	-6.98534	2.84169e-12	7.69898e-11
RAPH1	11.5453	-6.25811	0.896067	-6.98397	2.86954e-12	7.75762e-11
RP11.280G9.1	8.30388	-6.89175	0.987054	-6.98214	2.90714e-12	7.84964e-11
CXCL16	766.187	-5.72592	0.820254	-6.98066	2.938e-12	7.92324e-11
RGS19	758.093	-2.05661	0.29464	-6.98006	2.95051e-12	7.94725e-11
TMEM167A	907.534	-1.37249	0.196663	-6.9789	2.9751e-12	8.00372e-11
SNHG10	70.2522	1.71715	0.246131	6.97658	3.02445e-12	8.12654e-11
ZNF680	100.119	2.47817	0.355307	6.97472	3.0649e-12	8.2252e-11
PRSS57	783.105	3.60256	0.516732	6.97182	3.12869e-12	8.3862e-11
RPS26P21	9.92654	-3.99891	0.573632	-6.97121	3.14235e-12	8.41256e-11
LRPPRC	522.435	1.16505	0.167156	6.96981	3.17371e-12	8.48621e-11
P2RX4	878.903	-1.77544	0.254933	-6.96434	3.29949e-12	8.81185e-11
ARSB	276.111	-1.46707	0.210675	-6.96365	3.31567e-12	8.84433e-11
CYB561A3	311.849	-1.34548	0.19332	-6.95986	3.40612e-12	9.07461e-11
RRP7B	80.9824	1.42607	0.205135	6.95188	3.60462e-12	9.59185e-11
ASUN	276.561	1.77597	0.255507	6.95077	3.63289e-12	9.65543e-11
PM20D2	355.711	2.38898	0.343815	6.94843	3.69361e-12	9.80498e-11
SRD5A1	129.885	-1.98204	0.285293	-6.94738	3.7214e-12	9.86687e-11
OR52K3P	46.1158	-6.73213	0.969159	-6.94637	3.74805e-12	9.92557e-11
CFLAR	1004.53	-1.10386	0.158949	-6.94471	3.79235e-12	1.00308e-10
TANK	838.698	-1.25381	0.180778	-6.93565	4.04346e-12	1.06822e-10
STX10	456.226	-1.14369	0.164919	-6.93487	4.06584e-12	1.07285e-10
SLC35G2	45.7509	4.29602	0.619565	6.93392	4.09323e-12	1.07878e-10
MT2A	717.524	-3.80079	0.548195	-6.93327	4.11212e-12	1.08246e-10
VIMP	485.084	-1.25555	0.181157	-6.93069	4.18794e-12	1.10111e-10
TSPAN13	156.377	4.30769	0.622183	6.92351	4.40588e-12	1.15703e-10
PDRG1	201.509	1.33638	0.193043	6.92271	4.43097e-12	1.16223e-10
RGL1	112.902	-6.24562	0.902252	-6.92226	4.44492e-12	1.16451e-10
AC091177.1	4.17886	-5.67507	0.820596	-6.91579	4.65266e-12	1.21748e-10
ZYX	2566.86	-1.65622	0.239546	-6.91399	4.71218e-12	1.2316e-10
RNPEPL1	100.73	-1.49375	0.216083	-6.91288	4.74896e-12	1.23974e-10
ABCE1	491.057	1.48572	0.215119	6.90651	4.96734e-12	1.29521e-10
PPP1R15B	1307.48	-1.641	0.237641	-6.90537	5.00713e-12	1.30404e-10
BTG2	5086.19	-1.90566	0.276093	-6.90223	5.11911e-12	1.33006e-10
SETMAR	85.9154	1.75963	0.25493	6.9024	5.11308e-12	1.33006e-10
EVI2B	990.17	-2.00904	0.291158	-6.90018	5.19356e-12	1.34782e-10
RHOQ	74.1128	-1.71815	0.249153	-6.89595	5.35046e-12	1.3869e-10
METAP1D	61.0877	2.54158	0.368686	6.89362	5.43896e-12	1.40653e-10
RNPEP	557.645	-1.77311	0.257372	-6.88929	5.60725e-12	1.44835e-10
TMEM88	10.5589	-3.77586	0.548342	-6.88596	5.74005e-12	1.48092e-10
DNAH14	32.8631	4.51193	0.655911	6.87888	6.03246e-12	1.55454e-10
PKD2	89.7762	1.92719	0.280249	6.87672	6.12452e-12	1.57642e-10
B4GALT5	58.1056	-2.18147	0.317254	-6.87612	6.15044e-12	1.58125e-10
TLDC2	11.9211	-3.16158	0.459902	-6.87447	6.22225e-12	1.59784e-10
DDHD2	336.84	1.52721	0.22233	6.86908	6.46163e-12	1.65738e-10
TMEM17	21.784	3.70149	0.539172	6.86513	6.64297e-12	1.69994e-10
CD300LF	522.562	-2.82796	0.411986	-6.86421	6.68594e-12	1.70895e-10
AC011747.3	7.44388	-4.16661	0.608376	-6.84873	7.45068e-12	1.90001e-10
CBX5	698.482	1.69357	0.247491	6.84298	7.75614e-12	1.97562e-10
SLC25A25	274.96	-2.55294	0.373147	-6.84166	7.82792e-12	1.9916e-10
SLA2	151.977	3.02163	0.441799	6.83937	7.95404e-12	2.02135e-10
PTCD3	663.373	1.14096	0.166877	6.83715	8.0782e-12	2.05054e-10
COX8A	403.441	-1.28715	0.188404	-6.83186	8.38222e-12	2.12282e-10
ZNF273	87.0264	1.87	0.273755	6.83093	8.43682e-12	2.1342e-10
ZNF439	136.797	1.83956	0.26931	6.83064	8.45361e-12	2.13599e-10
C12orf76	98.1901	1.5674	0.22948	6.83024	8.47751e-12	2.13958e-10
TMEM150B	27.3376	-3.96103	0.580368	-6.82504	8.79031e-12	2.21598e-10
LDLR	808.477	-2.35768	0.345473	-6.82448	8.82414e-12	2.22197e-10
PROM1	804.959	5.63594	0.827412	6.81153	9.65634e-12	2.42875e-10
BCL2	73.9969	2.21462	0.325189	6.81025	9.74267e-12	2.44488e-10
DNAJC5	245.115	-1.77262	0.260312	-6.8096	9.78733e-12	2.45329e-10
LANCL1	311.786	1.82867	0.268603	6.80809	9.89061e-12	2.47636e-10
DGAT2	49.074	-3.70608	0.544474	-6.80672	9.98492e-12	2.49714e-10
NLRP12	132.718	-6.25866	0.919645	-6.80552	1.00688e-11	2.51526e-10
DPY19L2P2	32.9398	3.78637	0.556456	6.80444	1.01443e-11	2.53124e-10
CEBPB	113.376	-3.00172	0.441166	-6.80407	1.01701e-11	2.53482e-10
DLEU1	67.1783	1.92257	0.282587	6.80347	1.02125e-11	2.54248e-10
NAE1	440.964	1.32136	0.194222	6.80331	1.02239e-11	2.54248e-10
DPH7	244.812	1.08811	0.159947	6.80289	1.02538e-11	2.54705e-10
RNF19B	86.0871	-2.21947	0.326269	-6.80256	1.02775e-11	2.54797e-10
SSH2	743.025	-1.86952	0.274827	-6.80252	1.02807e-11	2.54797e-10
PRKACA	37.1897	-1.87626	0.275894	-6.80067	1.04134e-11	2.57796e-10
SVOPL	20.2315	4.49023	0.660595	6.79724	1.06641e-11	2.63707e-10
TKT	2617.11	-1.70436	0.250766	-6.79661	1.0711e-11	2.64569e-10
TMSB15B	29.3049	3.40144	0.500498	6.79612	1.07477e-11	2.65179e-10
RP11.221J22.1	6.9599	-6.71168	0.987692	-6.79532	1.08074e-11	2.65759e-10
ANKMY2	245.4	1.4898	0.219235	6.79546	1.0797e-11	2.65759e-10
C20orf24	194.537	-1.34946	0.198581	-6.7955	1.07937e-11	2.65759e-10
HSPA7	34.2526	-6.02116	0.886331	-6.79336	1.09554e-11	2.68999e-10
SLC9A8	158.353	-1.44284	0.212393	-6.79325	1.09636e-11	2.68999e-10
HSP90AB1	5673.24	1.06898	0.157421	6.79062	1.11654e-11	2.73646e-10
RP11.61J19.4	57.8632	-2.64769	0.390105	-6.78714	1.14377e-11	2.80009e-10
PLA1A	10.5766	-4.94164	0.728382	-6.78441	1.16566e-11	2.85049e-10
ATG7	376.176	-1.52946	0.225692	-6.77675	1.22912e-11	2.99241e-10
CLIP1	566.832	-1.24585	0.18384	-6.77681	1.22862e-11	2.99241e-10
RNF135	495.484	-1.31847	0.194716	-6.77125	1.27672e-11	3.10486e-10
MSH6	423.848	1.39254	0.205713	6.7693	1.29403e-11	3.14347e-10
NAGPA	208.107	-1.49172	0.220388	-6.76861	1.30022e-11	3.15505e-10
PTPRC	4859.22	-1.6173	0.238965	-6.76795	1.30616e-11	3.16596e-10
ACER3	268.527	-1.40365	0.207463	-6.76579	1.32587e-11	3.2102e-10
IL18BP	170.697	-2.42625	0.358786	-6.76238	1.35744e-11	3.28304e-10
PTPRJ	100.322	-4.35141	0.643952	-6.75736	1.40533e-11	3.39514e-10
ZNF70	35.0287	2.68067	0.396777	6.7561	1.41752e-11	3.42084e-10
MSANTD3	23.1357	2.58513	0.382695	6.75506	1.42779e-11	3.44185e-10
NOTCH4	47.1314	-2.27486	0.336813	-6.75405	1.43771e-11	3.46197e-10
JOSD2	62.9982	-1.94706	0.288305	-6.75347	1.44349e-11	3.4721e-10
ZNF524	51.9044	-1.25315	0.185744	-6.74667	1.51274e-11	3.6347e-10
PDCD11	207.133	1.36451	0.202292	6.74523	1.52781e-11	3.66692e-10
RP4.535B20.4	10.4718	-4.67414	0.69341	-6.7408	1.57519e-11	3.7724e-10
CEP57L1	104.45	1.85515	0.275313	6.73833	1.60212e-11	3.83275e-10
MCTP1	738.606	-1.36869	0.203303	-6.73227	1.67032e-11	3.99156e-10
GLRX	653.343	-1.74636	0.259461	-6.73075	1.68794e-11	4.02929e-10
DAZAP2	6445.55	-1.11946	0.16643	-6.72628	1.74053e-11	4.15034e-10
MS4A6A	2871.1	-4.34821	0.646548	-6.72528	1.75258e-11	4.16553e-10
OGFR	212.018	-2.13686	0.317725	-6.72549	1.75e-11	4.16553e-10
AP001056.1	7.52118	-4.74466	0.705483	-6.72541	1.75099e-11	4.16553e-10
SLC12A2	150.85	2.32389	0.345589	6.72442	1.76292e-11	4.18109e-10
MTMR2	319.953	1.33277	0.198198	6.72448	1.76226e-11	4.18109e-10
VIM.AS1	181.46	-1.88126	0.279789	-6.72384	1.76992e-11	4.19319e-10
IGHV3.73	19.0963	26.9392	4.007	6.72303	1.77984e-11	4.21216e-10
SLC38A5	136.884	2.98584	0.444139	6.72275	1.78324e-11	4.21568e-10
PPARGC1B	88.551	-2.13864	0.318138	-6.72235	1.78815e-11	4.22275e-10
TFPI	526.24	3.70476	0.551191	6.72138	1.80013e-11	4.24649e-10
PSTPIP1	307.31	-2.71368	0.40397	-6.71752	1.84841e-11	4.35574e-10
TMCC1.AS1	39.7014	2.9379	0.437562	6.71424	1.8905e-11	4.45016e-10
RP11.589N15.2	5.94313	-5.15985	0.768843	-6.71118	1.93054e-11	4.53955e-10
RP11.25K19.1	100.131	3.33987	0.498263	6.70301	2.04164e-11	4.79567e-10
SOD2	5414.26	-2.40292	0.358539	-6.70199	2.05596e-11	4.82417e-10
NOTCH2NL	191.275	-1.29453	0.193165	-6.70167	2.06055e-11	4.8298e-10
NUAK2	214.404	-4.19453	0.625914	-6.70144	2.06376e-11	4.83217e-10
NUDT16	202.789	-1.92426	0.287167	-6.70082	2.07247e-11	4.84743e-10
MLC1	389.941	2.74581	0.409785	6.70061	2.07553e-11	4.84942e-10
EHD1	594.518	-2.00053	0.29859	-6.69993	2.0852e-11	4.86688e-10
LZTFL1	99.2879	1.69766	0.253548	6.6956	2.14782e-11	5.00771e-10
BCL2L11	234.794	-3.43662	0.513855	-6.68793	2.26356e-11	5.26642e-10
TLR5	136.952	-5.54427	0.829755	-6.68182	2.35992e-11	5.48482e-10
ZNF852	54.3577	1.84115	0.275721	6.67759	2.42902e-11	5.63947e-10
C2orf62	25.8499	-3.20474	0.47994	-6.67736	2.43279e-11	5.64229e-10
CTD.2037K23.2	102.888	1.64207	0.245941	6.67666	2.44454e-11	5.66357e-10
FAM200B	180.178	-1.18449	0.177458	-6.67476	2.47636e-11	5.73127e-10
COMMD5	142.931	-1.32969	0.199233	-6.67402	2.48886e-11	5.75414e-10
GPR183	2441.07	-3.488	0.522641	-6.67381	2.49248e-11	5.75647e-10
PARP16	144.934	1.4252	0.2136	6.67226	2.51893e-11	5.8054e-10
TCTN2	24.7466	3.15294	0.472609	6.67135	2.53461e-11	5.83542e-10
FCGR1A	56.4252	-3.48066	0.521806	-6.67042	2.55081e-11	5.86632e-10
PFAS	196.692	1.5117	0.226632	6.67027	2.55335e-11	5.86632e-10
NSUN6	77.343	1.30647	0.19589	6.66939	2.56865e-11	5.89533e-10
GPNMB	40.0899	-5.19876	0.77968	-6.6678	2.59658e-11	5.95322e-10
C1orf186	487.558	3.96483	0.594738	6.66652	2.61942e-11	5.99935e-10
TCEAL1	91.4442	1.74778	0.262455	6.65937	2.74997e-11	6.29179e-10
GIMAP4	264.281	-6.15832	0.924866	-6.6586	2.7644e-11	6.31825e-10
STARD9	72.4744	2.77209	0.416726	6.65207	2.89006e-11	6.59862e-10
MDN1	175.367	1.13977	0.171363	6.65124	2.90643e-11	6.62912e-10
RP1.90J20.12	52.696	-2.5545	0.384181	-6.64919	2.94702e-11	6.71476e-10
FYB	1217.31	-2.45289	0.368955	-6.64819	2.96713e-11	6.75359e-10
CYBA	2421.82	-1.74229	0.262111	-6.64714	2.98833e-11	6.79483e-10
ODF3B	269.762	-3.66067	0.55076	-6.64658	2.99977e-11	6.8138e-10
ZNF792	96.6768	2.88876	0.434666	6.64594	3.01284e-11	6.83644e-10
RFX7	169.708	1.33792	0.201342	6.64503	3.03165e-11	6.87206e-10
LAMB3	15.0484	-5.59909	0.84309	-6.64116	3.11229e-11	7.04529e-10
TOPORS	518.376	1.52338	0.229389	6.64105	3.11447e-11	7.04529e-10
CD48	298.424	-4.27486	0.643891	-6.63911	3.15578e-11	7.13141e-10
TRUB2	185.463	1.62456	0.244851	6.6349	3.2473e-11	7.31573e-10
PGAP2	145.996	1.0618	0.160036	6.63475	3.25062e-11	7.31573e-10
DOK4	22.6223	3.72973	0.562413	6.63167	3.31915e-11	7.46232e-10
FANCF	73.6686	2.2059	0.33265	6.63129	3.32767e-11	7.47386e-10
LARS	724.046	1.20694	0.182135	6.62664	3.43421e-11	7.69744e-10
PHOSPHO2	37.1692	1.90521	0.2876	6.62453	3.48355e-11	7.8001e-10
RP11.779O18.3	11.4948	-2.93725	0.443448	-6.62366	3.5042e-11	7.83838e-10
LYRM7	259.553	1.57342	0.237615	6.62171	3.55062e-11	7.93415e-10
ARG1	56.4196	-4.47676	0.676262	-6.61986	3.59551e-11	8.02633e-10
C9orf43	45.8983	3.96242	0.598599	6.6195	3.6042e-11	8.0376e-10
C12orf23	232.591	2.58889	0.391249	6.61699	3.66596e-11	8.16704e-10
ZDHHC3	380.146	-1.11218	0.168119	-6.61542	3.70505e-11	8.2458e-10
GPR89A	34.7861	1.17245	0.177258	6.61438	3.73118e-11	8.28722e-10
SCRN2	175.486	1.3098	0.19802	6.61447	3.72873e-11	8.28722e-10
LAPTM5	12703.1	-1.68999	0.255574	-6.61251	3.77848e-11	8.37539e-10
ATP2C1	678.585	1.06858	0.161596	6.61266	3.77478e-11	8.37539e-10
DNASE1L1	83.0054	-1.42381	0.215336	-6.61204	3.79052e-11	8.39363e-10
TEX30	228.879	2.18518	0.330514	6.61145	3.80569e-11	8.41875e-10
ALDH3B1	558.493	-2.17134	0.329005	-6.59971	4.11966e-11	9.10416e-10
IL10RA	2499	-3.85566	0.584907	-6.59192	4.34179e-11	9.58544e-10
NPM3	43.7839	1.80667	0.2741	6.59129	4.36024e-11	9.61653e-10
LINC00482	12.2311	-4.95258	0.751405	-6.59109	4.36609e-11	9.61981e-10
MIR3945	11.6091	-4.59561	0.697432	-6.58933	4.41817e-11	9.72482e-10
HLA.F	348.001	-2.73804	0.415709	-6.58644	4.50495e-11	9.89607e-10
IPMK	103.948	-1.35622	0.20591	-6.58648	4.50373e-11	9.89607e-10
NBPF10	194.587	-1.41287	0.214543	-6.58546	4.53486e-11	9.94194e-10
OFD1	402.652	1.31669	0.199937	6.5855	4.5336e-11	9.94194e-10
TNFSF4	102.378	3.1629	0.48039	6.58402	4.57888e-11	1.00285e-09
FPR3	18.7188	-6.18045	0.938792	-6.58341	4.59773e-11	1.00598e-09
PDXK	286.849	-2.08569	0.316888	-6.58179	4.6483e-11	1.01603e-09
ABHD5	182.039	-1.7186	0.261138	-6.58121	4.66625e-11	1.01895e-09
PLB1	146.976	-1.92135	0.292058	-6.57866	4.74708e-11	1.03557e-09
TMSB4XP8	319.767	-1.62116	0.246481	-6.57723	4.79295e-11	1.04454e-09
CORO7	156.537	-1.22812	0.186781	-6.57518	4.85929e-11	1.05795e-09
RP11.497H16.7	4.97843	-5.34986	0.813979	-6.57247	4.94864e-11	1.07634e-09
VNN2	373.425	-4.93132	0.750412	-6.57148	4.98165e-11	1.08245e-09
DNMT3B	146.631	3.52687	0.536946	6.56838	5.08651e-11	1.10415e-09
EMID1	79.6311	3.47718	0.529483	6.56713	5.12942e-11	1.11237e-09
ZNF550	123.522	2.0983	0.319636	6.56467	5.21467e-11	1.12974e-09
KMO	43.3814	-3.79736	0.578512	-6.56402	5.23769e-11	1.1325e-09
C11orf57	149.017	1.7663	0.269084	6.56413	5.23363e-11	1.1325e-09
ITGA7	27.874	-3.30993	0.504395	-6.56218	5.30261e-11	1.14542e-09
ZRANB3	60.4179	1.56632	0.238785	6.55955	5.39706e-11	1.16468e-09
FAM227B	31.6983	2.04291	0.311451	6.55931	5.40577e-11	1.16541e-09
ZNF660	37.2398	2.24505	0.34249	6.55508	5.56139e-11	1.19779e-09
SDC2	52.4005	-5.9614	0.909752	-6.55278	5.64772e-11	1.2152e-09
GLMN	96.4183	1.51711	0.231544	6.55211	5.67283e-11	1.21941e-09
IGFLR1	13.8445	-2.34607	0.358202	-6.54956	5.77054e-11	1.238e-09
NPM1	1746.18	1.3801	0.210806	6.54679	5.87868e-11	1.25997e-09
PTGES	5.97408	-6.13134	0.937102	-6.54288	6.03465e-11	1.29214e-09
GLCCI1	39.2385	2.57255	0.393195	6.54269	6.04226e-11	1.29252e-09
AKIRIN2	1236	-1.54867	0.236774	-6.54071	6.12291e-11	1.3085e-09
PSD	17.0928	-2.12455	0.324902	-6.53903	6.19182e-11	1.32194e-09
CSF2RA	618.027	-2.97221	0.454618	-6.53782	6.2422e-11	1.33141e-09
ZCCHC11	350.493	1.62052	0.247886	6.53737	6.26109e-11	1.33415e-09
MEST	1162.26	4.35647	0.666896	6.53245	6.47039e-11	1.37741e-09
PRPS1	346.516	1.10616	0.169339	6.53221	6.48067e-11	1.37827e-09
KCTD5	199.249	-1.10194	0.168728	-6.53088	6.53828e-11	1.38918e-09
LSM10	241.475	-1.33792	0.204886	-6.53008	6.57352e-11	1.39532e-09
RP11.340F14.5	12.1626	-2.80554	0.42968	-6.52938	6.60443e-11	1.40053e-09
HN1L	149.244	2.21618	0.339472	6.52832	6.65111e-11	1.40908e-09
KAT2A	189.333	1.31912	0.202156	6.52528	6.78768e-11	1.43663e-09
MRPL1	145.26	1.46262	0.224248	6.52233	6.92253e-11	1.46236e-09
NUP35	72.5963	1.86063	0.285292	6.52185	6.94434e-11	1.46556e-09
CTD.2162K18.5	28.2676	2.39642	0.367503	6.52081	6.99277e-11	1.47437e-09
DBN1	132.149	3.02334	0.463729	6.51963	7.04794e-11	1.48458e-09
SMYD3	261.024	2.29785	0.352522	6.51832	7.11005e-11	1.49623e-09
PHACTR1	724.652	-2.21248	0.339441	-6.51801	7.12451e-11	1.49785e-09
GZF1	295.819	-1.63995	0.251659	-6.51654	7.19469e-11	1.51116e-09
RP11.473M20.14	48.1151	1.7989	0.276118	6.51497	7.27029e-11	1.52558e-09
NIPSNAP1	144.077	1.71572	0.263376	6.51432	7.30177e-11	1.53073e-09
CTD.2530H12.2	2.87784	-5.20684	0.799476	-6.51281	7.37586e-11	1.54479e-09
ELMO2	550.538	-1.19018	0.182849	-6.50907	7.56173e-11	1.58222e-09
ALDH1A2	13.193	-5.46747	0.840069	-6.50836	7.5975e-11	1.58819e-09
ASS1P1	27.211	2.27504	0.349591	6.50772	7.62999e-11	1.59348e-09
ZNF737	53.2433	2.71196	0.416967	6.50402	7.82029e-11	1.63167e-09
PIK3CD	804.81	-1.20479	0.185244	-6.5038	7.83182e-11	1.63253e-09
ZFAND1	263.829	1.42872	0.219686	6.50347	7.8487e-11	1.6345e-09
RAVER2	54.2827	2.26568	0.348392	6.50326	7.85955e-11	1.63522e-09
TCN2	486.391	-3.40437	0.52356	-6.50235	7.9074e-11	1.64362e-09
UBQLN4	67.0225	1.16913	0.179984	6.49574	8.26236e-11	1.71578e-09
ST8SIA4	372.932	-1.40738	0.216674	-6.49536	8.28338e-11	1.71853e-09
HNRNPA1P48	25.7657	1.40941	0.21712	6.49141	8.50355e-11	1.76255e-09
TFE3	366.006	-1.22576	0.188851	-6.49062	8.54842e-11	1.77018e-09
STS	62.1904	-3.47783	0.535873	-6.49004	8.58157e-11	1.77538e-09
CD34	1617.45	5.15128	0.794098	6.48696	8.75838e-11	1.81026e-09
RP11.24F11.2	15.8237	-3.73179	0.575511	-6.4843	8.91444e-11	1.84079e-09
BCL3	89.5719	-2.51353	0.387705	-6.48311	8.98493e-11	1.85361e-09
MAP1LC3B2	20.9026	-2.3882	0.368438	-6.48197	9.05336e-11	1.86597e-09
SNAPC2	93.9955	-1.367	0.210915	-6.48129	9.09428e-11	1.87266e-09
NEDD4	100.415	2.1225	0.327595	6.47902	9.23191e-11	1.89922e-09
GNPTG	397.545	-1.18894	0.183733	-6.471	9.73533e-11	2.00092e-09
CENPJ	208.94	1.84871	0.285734	6.47002	9.79869e-11	2.01206e-09
CTD.3074O7.12	48.6764	1.3717	0.212098	6.46729	9.97784e-11	2.04694e-09
C20orf96	133.027	1.69342	0.261894	6.46604	1.00602e-10	2.06191e-09
TRAF5	303.166	2.32909	0.360259	6.46504	1.01274e-10	2.07184e-09
BAALC	296.729	4.45623	0.68928	6.46506	1.0126e-10	2.07184e-09
PFKFB4	144.444	-2.60789	0.403456	-6.46388	1.02051e-10	2.0858e-09
RP11.327F22.6	3.83389	-5.21703	0.807138	-6.46361	1.02231e-10	2.08755e-09
SMARCAD1	179.132	1.22643	0.189774	6.46255	1.02952e-10	2.10031e-09
AP001877.1	32.2592	1.9136	0.296162	6.46132	1.03792e-10	2.11354e-09
NPTN	68.1467	-1.38759	0.21475	-6.46143	1.03719e-10	2.11354e-09
APEX1	1009.52	1.30005	0.201305	6.4581	1.06024e-10	2.15699e-09
IMPDH1	695.595	-1.70979	0.264786	-6.45727	1.06606e-10	2.16484e-09
SMYD5	76.1804	1.57441	0.243932	6.45431	1.08714e-10	2.20562e-09
ZNF507	73.775	2.71232	0.420597	6.44875	1.12778e-10	2.28596e-09
CCDC62	8.7469	2.87224	0.445434	6.44817	1.1321e-10	2.2926e-09
CYP1B1.AS1	6.36796	-4.90539	0.761199	-6.4443	1.16137e-10	2.34758e-09
FANCL	116.297	1.70005	0.263804	6.44437	1.16081e-10	2.34758e-09
PPARG	22.9358	-5.33679	0.828187	-6.44394	1.16413e-10	2.34923e-09
IL17RA	990.721	-2.71858	0.421883	-6.44391	1.16433e-10	2.34923e-09
ST3GAL5	198.982	-2.69652	0.418559	-6.44237	1.1762e-10	2.37102e-09
IRF4	36.7014	-4.87874	0.757686	-6.439	1.2026e-10	2.4198e-09
WLS	11.7181	-7.29527	1.13332	-6.4371	1.21776e-10	2.44583e-09
ARHGEF1	1176.98	-1.20234	0.186923	-6.43226	1.25717e-10	2.5227e-09
HERC2P9	59.6369	1.75171	0.272432	6.42992	1.27672e-10	2.5596e-09
PRCP	804.683	-1.66114	0.258387	-6.42888	1.28543e-10	2.57473e-09
RP11.362F19.1	19.2744	-8.61613	1.34118	-6.42428	1.32491e-10	2.64899e-09
GPRC5A	16.9898	-7.09888	1.10531	-6.42251	1.34048e-10	2.67768e-09
PIK3AP1	1436.93	-1.76704	0.275187	-6.42121	1.35191e-10	2.69807e-09
RP1.229K20.5	3.22293	-5.2723	0.821613	-6.41701	1.38974e-10	2.77106e-09
SNX27	679.831	-1.53576	0.23954	-6.4113	1.44283e-10	2.87431e-09
METAP2	389.256	1.00278	0.156523	6.40662	1.48783e-10	2.96128e-09
NUDT22	85.4946	-1.11649	0.174338	-6.40418	1.51179e-10	3.00624e-09
MCCC1	394.658	1.15751	0.18084	6.40074	1.54626e-10	3.07202e-09
DCAF4	69.6461	1.85355	0.289641	6.39947	1.5592e-10	3.09494e-09
FBXW9	42.5087	1.51499	0.236743	6.39931	1.56079e-10	3.09532e-09
METTL9	1156.66	-1.21193	0.189421	-6.39806	1.57364e-10	3.11799e-09
RP11.251M1.1	17.7858	5.46652	0.854469	6.39756	1.57875e-10	3.1253e-09
PIK3R2.1	2.90186	-5.14801	0.804911	-6.39575	1.59764e-10	3.15985e-09
HCK	1751.96	-3.79817	0.593907	-6.39523	1.60304e-10	3.16769e-09
MNT	82.4744	-1.74164	0.272364	-6.39453	1.6104e-10	3.17939e-09
AC108004.3	39.3593	3.41589	0.534286	6.39337	1.62268e-10	3.20076e-09
PLA2G7	68.8193	-6.48428	1.01476	-6.38994	1.65956e-10	3.26765e-09
SFXN4	164.905	1.14134	0.178763	6.38463	1.71807e-10	3.37985e-09
FRAT2	24.9949	-1.78089	0.278963	-6.38395	1.72573e-10	3.39189e-09
AC021860.1	14.4225	4.19236	0.656818	6.38284	1.73836e-10	3.41366e-09
DENND1C	367.802	-1.15944	0.181664	-6.38233	1.74416e-10	3.422e-09
UBE2Q2P1	82.4365	1.94604	0.305016	6.38012	1.76949e-10	3.46861e-09
ZNF256	161.487	2.08953	0.327661	6.37712	1.80455e-10	3.53419e-09
PLA2G12A	136.544	1.89577	0.297426	6.37393	1.84245e-10	3.60521e-09
CSF1R	1783.6	-3.6694	0.575752	-6.37323	1.85082e-10	3.61725e-09
KIAA0513	198.545	-3.3529	0.526162	-6.37238	1.86118e-10	3.63219e-09
ADM	1034.62	-4.76341	0.747536	-6.37215	1.86394e-10	3.63436e-09
SGTB	141.075	-1.88254	0.29549	-6.37091	1.87915e-10	3.66076e-09
GLIPR2	1445.44	-2.09983	0.329653	-6.36982	1.89254e-10	3.68261e-09
TMEM220	106.43	2.19996	0.345377	6.36972	1.8937e-10	3.68261e-09
HERPUD1	2496.73	-2.09676	0.329201	-6.36926	1.89943e-10	3.69049e-09
MARCH1	401.819	-3.43417	0.539253	-6.36838	1.9104e-10	3.70807e-09
DBNL	1211.96	-1.29708	0.20368	-6.36826	1.91185e-10	3.70807e-09
MYB	643.98	2.43608	0.382601	6.36714	1.9259e-10	3.72877e-09
DENND4B	611.248	-1.40619	0.220872	-6.36656	1.9331e-10	3.73943e-09
DCAF16	280.48	1.16794	0.183485	6.36531	1.94896e-10	3.7668e-09
BATF3	17.103	-3.96447	0.623079	-6.3627	1.98235e-10	3.82796e-09
Y_RNA.754	7.39975	-5.01143	0.787669	-6.36235	1.98684e-10	3.83328e-09
SPPL2B	334.425	1.28112	0.201464	6.35902	2.03039e-10	3.91388e-09
USP20	307.733	1.55905	0.245189	6.35855	2.03662e-10	3.92246e-09
RRAD	53.2922	-4.87843	0.767339	-6.35759	2.04939e-10	3.94301e-09
CTA.445C9.14	14.6217	3.40267	0.535222	6.35748	2.05087e-10	3.94301e-09
ZRANB2	844.055	1.01761	0.160072	6.35717	2.055e-10	3.9475e-09
C1orf132	103.031	-1.66783	0.262431	-6.35532	2.07996e-10	3.99196e-09
PPP1R9B	44.7245	-1.40831	0.221651	-6.35371	2.10181e-10	4.03039e-09
EAF1.AS1	6.49304	-3.53252	0.556568	-6.34696	2.19607e-10	4.20749e-09
METTL3	423.453	1.11369	0.17551	6.34547	2.21746e-10	4.24478e-09
RAB5C	437.111	-1.30024	0.20493	-6.3448	2.22716e-10	4.25964e-09
PDE8A	103.883	-1.83393	0.289053	-6.3446	2.23e-10	4.26138e-09
PRKCI	172.419	1.19099	0.187745	6.34366	2.24366e-10	4.28376e-09
RAP2B	1221.18	-1.48762	0.234559	-6.3422	2.26505e-10	4.32085e-09
WAS	172.767	-1.52017	0.239763	-6.34031	2.2931e-10	4.37058e-09
FAM45A	242.141	-1.26145	0.198966	-6.34003	2.29723e-10	4.37466e-09
RP5.935K16.1	45.7284	1.75429	0.276707	6.33988	2.29937e-10	4.37497e-09
FAM216A	142.905	2.45276	0.386917	6.33923	2.30923e-10	4.38993e-09
HOPX	445.675	4.18831	0.660737	6.33885	2.31481e-10	4.39674e-09
PRKCDBP	26.3269	-6.4263	1.01391	-6.33815	2.32536e-10	4.41298e-09
GATA2	551.338	3.4849	0.550075	6.33532	2.36843e-10	4.49084e-09
SLC26A6	218.134	-1.67813	0.264909	-6.33474	2.37737e-10	4.50392e-09
TTC24	139.764	3.58464	0.565889	6.33452	2.38089e-10	4.50671e-09
MMP24.AS1	77.4988	-1.21425	0.191964	-6.32539	2.52595e-10	4.77718e-09
MAPK7	185.407	-2.31005	0.365609	-6.31837	2.6434e-10	4.99502e-09
JDP2	56.4812	-2.7042	0.428232	-6.31481	2.70499e-10	5.10704e-09
FAM105A	368.06	-3.84789	0.609468	-6.31351	2.72771e-10	5.14552e-09
RP11.50C13.2	4.78133	-5.44365	0.86317	-6.30658	2.85261e-10	5.37652e-09
ZNF66	56.5874	1.85496	0.294418	6.30044	2.96793e-10	5.58909e-09
RAPGEF1	154.872	-2.0436	0.324376	-6.30008	2.97487e-10	5.59738e-09
OSTF1	888.665	-1.5522	0.246403	-6.29942	2.98753e-10	5.6164e-09
RP11.134P9.3	17.6383	-3.9313	0.624509	-6.29503	3.07339e-10	5.76797e-09
SYNE3	173.466	-1.83924	0.292288	-6.29257	3.1226e-10	5.85534e-09
NARS2	180.021	1.82556	0.290289	6.28877	3.19998e-10	5.99024e-09
CDC16	437.425	1.06066	0.168684	6.28783	3.21937e-10	6.02142e-09
TNIP2	280.947	-1.34427	0.213909	-6.28429	3.29363e-10	6.1551e-09
LRPAP1	1184.14	-1.61647	0.257298	-6.28249	3.33191e-10	6.21609e-09
IFT81	55.5048	2.75753	0.438915	6.28261	3.32932e-10	6.21609e-09
RP11.745A24.1	8.25107	-3.06435	0.487838	-6.2815	3.35319e-10	6.24942e-09
IL27	3.79258	-5.21165	0.829696	-6.2814	3.35545e-10	6.24942e-09
C5orf58	10.5033	-3.1238	0.497713	-6.27631	3.46708e-10	6.44643e-09
PTGER2	1502.14	-2.00617	0.31991	-6.27104	3.58634e-10	6.66256e-09
B2M	61557.8	-1.52262	0.242855	-6.26967	3.61812e-10	6.71592e-09
NIPSNAP3B	56.3242	1.88165	0.300261	6.2667	3.6878e-10	6.83951e-09
MZB1	182.474	4.53967	0.724609	6.26499	3.72838e-10	6.90896e-09
NFKBIE	417.798	-2.15193	0.343534	-6.26409	3.75002e-10	6.94321e-09
ATP6V0A2	381.915	1.45372	0.232193	6.2608	3.83012e-10	7.07962e-09
ABCD1	144.187	-1.99642	0.318959	-6.25917	3.87043e-10	7.14813e-09
PPM1K	171.378	1.83612	0.293364	6.25885	3.87824e-10	7.15655e-09
ZNF248	68.6992	2.14162	0.342201	6.25835	3.89072e-10	7.17358e-09
RP5.1022P6.3	24.067	-2.55627	0.408498	-6.25772	3.90637e-10	7.1964e-09
SULF2	294.822	-3.87442	0.619218	-6.25696	3.92562e-10	7.22582e-09
CSGALNACT2	1085.48	-1.61043	0.257444	-6.25546	3.96345e-10	7.28937e-09
ZNF254	176.994	1.86646	0.298564	6.25144	4.06692e-10	7.47344e-09
POLG2	186.096	1.07439	0.171945	6.24848	4.14458e-10	7.60979e-09
TCEAL4	230.4	1.42143	0.227516	6.24763	4.16738e-10	7.64528e-09
UBE3D	34.1086	1.77605	0.284327	6.24652	4.1969e-10	7.69304e-09
MYOZ3	17.2707	4.8757	0.780585	6.24622	4.20513e-10	7.70171e-09
PKIG	168.039	2.0654	0.3308	6.24365	4.27486e-10	7.82292e-09
CD93	355.293	-3.82074	0.612215	-6.24085	4.35206e-10	7.95759e-09
TBCE	146.793	1.00754	0.161533	6.23739	4.44922e-10	8.1285e-09
HEATR3	105.024	-1.44907	0.232377	-6.23586	4.49313e-10	8.19512e-09
MRFAP1L1	186.654	1.53789	0.246693	6.23401	4.54638e-10	8.28538e-09
IFT140	89.6879	1.72233	0.276326	6.23297	4.57674e-10	8.33383e-09
CEP70	224.444	3.42713	0.54991	6.23217	4.60019e-10	8.3627e-09
PLEKHM1P	380.448	-1.22158	0.19601	-6.23221	4.59912e-10	8.3627e-09
CCND2	1090.85	2.21367	0.355229	6.23167	4.61475e-10	8.38225e-09
NLE1	47.1659	1.95544	0.313814	6.23121	4.62833e-10	8.40001e-09
MARCKS	235.224	-4.92043	0.789867	-6.22944	4.68109e-10	8.48876e-09
SHISA4	12.7397	-3.61571	0.580613	-6.22739	4.74277e-10	8.59353e-09
GKAP1	24.4466	2.2661	0.363935	6.22667	4.76462e-10	8.621e-09
BLVRB	631.151	-2.40897	0.386882	-6.22663	4.76575e-10	8.621e-09
CNPY3	1359.27	-1.29192	0.207551	-6.22458	4.8286e-10	8.72752e-09
ANAPC7	221.496	1.31575	0.211594	6.21828	5.02633e-10	9.06261e-09
FAM228B	222.936	1.32537	0.213318	6.21313	5.19403e-10	9.35732e-09
ZNF606	98.65	1.91067	0.307643	6.21069	5.27513e-10	9.48791e-09
GPALPP1	155.775	1.04484	0.16825	6.21003	5.29736e-10	9.52013e-09
TRMT61B	106.494	1.14826	0.184955	6.20831	5.35591e-10	9.60967e-09
GYPA	14.3368	19.52	3.14548	6.20571	5.44488e-10	9.75577e-09
NCOA3	764.596	-1.07002	0.172427	-6.20568	5.44619e-10	9.75577e-09
NAA35	207.326	1.0804	0.174108	6.20534	5.45784e-10	9.76869e-09
GSTO1	872.085	-1.05893	0.170669	-6.20456	5.48514e-10	9.80959e-09
CCDC169	18.2658	3.55826	0.573628	6.20307	5.53713e-10	9.89453e-09
TCEB2	613.345	-1.38133	0.222786	-6.20026	5.6371e-10	1.0065e-08
TNFRSF10B	698.555	-1.71375	0.276472	-6.19861	5.69622e-10	1.01623e-08
AC012668.2	4.1209	-5.86317	0.946024	-6.19769	5.72965e-10	1.02137e-08
LDHB	3312.64	1.47021	0.23732	6.19506	5.82617e-10	1.03774e-08
GPSM1	52.63	2.90341	0.468684	6.19481	5.83558e-10	1.03857e-08
RP11.157E21.1	4.06452	-5.67234	0.91625	-6.19082	5.98525e-10	1.06435e-08
ETAA1	92.0159	1.65319	0.267328	6.18413	6.24466e-10	1.10959e-08
PRRG3	14.8886	-1.89769	0.306871	-6.18399	6.25007e-10	1.10965e-08
PELI3	38.2854	-2.53139	0.409421	-6.18285	6.29526e-10	1.11678e-08
NOP58	979.551	1.28514	0.207876	6.18223	6.32011e-10	1.12028e-08
KLHL2	97.4726	-1.9758	0.319666	-6.18083	6.37645e-10	1.12936e-08
NSUN5P1	61.3165	1.57875	0.255564	6.17753	6.51109e-10	1.15228e-08
MIPEPP3	13.6924	2.06894	0.334935	6.17712	6.528e-10	1.15434e-08
METTL21B	79.6424	1.99211	0.322605	6.17508	6.61317e-10	1.1666e-08
GPR56	352.153	4.31454	0.69894	6.17298	6.70133e-10	1.1812e-08
TAF1D	563.03	1.34458	0.217831	6.17259	6.71798e-10	1.18319e-08
TAF9B	195.971	1.09494	0.177443	6.17066	6.80041e-10	1.19675e-08
IFITM10	31.9885	-3.85311	0.624439	-6.17052	6.80671e-10	1.19691e-08
NOG	67.6974	3.97336	0.644231	6.1676	6.93357e-10	1.21824e-08
RP11.134P9.1	29.9192	-2.78044	0.450825	-6.16745	6.94007e-10	1.21841e-08
PAXIP1.AS1	100.155	1.56079	0.253084	6.16707	6.95661e-10	1.22034e-08
ZNF3	350.936	1.14751	0.186167	6.16388	7.09834e-10	1.24421e-08
C4orf48	36.3944	-2.04691	0.332223	-6.16123	7.21803e-10	1.26419e-08
CD58	446.701	-1.34721	0.2187	-6.16007	7.27112e-10	1.27247e-08
B4GALT6	45.2351	2.80986	0.456154	6.1599	7.27932e-10	1.2729e-08
CLMN	143.825	-2.15856	0.350481	-6.15885	7.32734e-10	1.28028e-08
PHF6	268.724	1.44192	0.234141	6.15833	7.35149e-10	1.28348e-08
ORC2	135.343	1.13547	0.184383	6.15818	7.35836e-10	1.28366e-08
IFT74	138.793	1.27369	0.206855	6.15741	7.39424e-10	1.2889e-08
FAM122B	102.94	1.28822	0.209222	6.15721	7.40399e-10	1.28958e-08
CTC.444N24.11	72.4929	1.70555	0.277099	6.15503	7.50649e-10	1.3064e-08
CTA.384D8.35	11.67	-4.53759	0.737403	-6.15348	7.58029e-10	1.31821e-08
SAAL1	133.691	1.12609	0.183043	6.15205	7.64889e-10	1.32909e-08
RP1.111C20.4	64.7903	-1.67442	0.272225	-6.15088	7.70554e-10	1.33787e-08
RAD1	144.723	1.10535	0.179738	6.14979	7.75872e-10	1.34605e-08
NPM2	41.5478	3.69021	0.60024	6.14789	7.85183e-10	1.36113e-08
CD69	6619.17	2.31481	0.376536	6.14766	7.8636e-10	1.3621e-08
TEC	241.612	1.60771	0.261608	6.14547	7.97266e-10	1.3799e-08
C10orf2	50.3566	2.9283	0.476534	6.145	7.99619e-10	1.38289e-08
RP11.351D16.3	17.1908	-2.08981	0.340102	-6.14466	8.01326e-10	1.38475e-08
NCEH1	158.767	-2.21907	0.361379	-6.14058	8.22217e-10	1.41974e-08
WRN	110.314	1.34314	0.218808	6.13844	8.33373e-10	1.43788e-08
GLTPD2	9.19439	-4.05198	0.660205	-6.13746	8.38512e-10	1.44561e-08
ZNF251	98.2548	1.45889	0.237788	6.13523	8.50377e-10	1.46492e-08
RP11.802E16.3	18.5301	-1.85586	0.302504	-6.13501	8.51553e-10	1.4658e-08
BCL10	368.563	-1.16352	0.18966	-6.13478	8.52781e-10	1.46677e-08
RP11.61F12.1	3.10086	-5.70968	0.931198	-6.13154	8.7032e-10	1.49577e-08
MMP9	20.4057	-7.32856	1.19532	-6.13104	8.73058e-10	1.49931e-08
ADPRM	215.411	1.41197	0.230332	6.13017	8.77841e-10	1.50555e-08
FAM117A	234.013	2.12805	0.347146	6.13013	8.78059e-10	1.50555e-08
ARAP3	30.1624	-3.9826	0.649765	-6.12928	8.82771e-10	1.51245e-08
ZNF766	353.85	1.38596	0.226213	6.1268	8.96641e-10	1.53502e-08
RP11.15H20.6	29.5121	1.60766	0.26246	6.12537	9.04719e-10	1.54765e-08
SLC39A10	313.256	1.82813	0.298648	6.12136	9.27781e-10	1.58586e-08
RP11.351I24.1	22.4832	-4.47438	0.731084	-6.12021	9.34542e-10	1.59596e-08
C3	25.8185	-4.76913	0.779256	-6.12011	9.35137e-10	1.59596e-08
CD200R1	31.1476	-5.39676	0.882652	-6.11425	9.70101e-10	1.65435e-08
RPS12P20	10.3432	-2.70532	0.442533	-6.11327	9.76109e-10	1.66331e-08
SDR42E2	9.50347	-3.32896	0.544749	-6.11101	9.90056e-10	1.68577e-08
ELL	295.753	-1.85264	0.303193	-6.11043	9.93621e-10	1.69054e-08
ZNF320	77.1521	1.95381	0.31977	6.11004	9.96088e-10	1.69343e-08
TSR1	264.642	1.20472	0.19729	6.10636	1.0193e-09	1.73021e-08
YPEL2	497.519	-1.89248	0.310051	-6.10377	1.03593e-09	1.75709e-08
GPR65	140.397	-4.1496	0.680128	-6.1012	1.05273e-09	1.78318e-08
SIGLEC1	119.092	-7.43612	1.2188	-6.10117	1.05293e-09	1.78318e-08
ATP5E	1429.06	-1.21519	0.199213	-6.09996	1.06095e-09	1.79539e-08
SIRT7	210.872	-1.34696	0.22104	-6.09372	1.10313e-09	1.86533e-08
SPAG5.AS1	71.4895	-2.18817	0.359111	-6.09329	1.10615e-09	1.869e-08
OBSCN	39.8684	2.65599	0.43597	6.09213	1.11416e-09	1.88109e-08
ATP11A	161.998	-1.76745	0.290248	-6.08947	1.13288e-09	1.90832e-08
FAHD2CP	17.2453	2.17897	0.357858	6.08893	1.13665e-09	1.9132e-08
EGFL7	399.343	2.91622	0.478995	6.08819	1.14191e-09	1.92059e-08
LL22NC03.N27C7.1	4.46276	3.41189	0.560485	6.08738	1.14772e-09	1.92888e-08
TPD52L2	930.179	-1.29031	0.211992	-6.0866	1.15334e-09	1.93685e-08
ZSCAN2	67.7622	1.60868	0.264369	6.085	1.16491e-09	1.95479e-08
ZNF519	33.5337	1.95096	0.320636	6.08465	1.16746e-09	1.95759e-08
EVI2A	203.704	-1.58442	0.260414	-6.08424	1.17043e-09	1.96106e-08
ATXN7L3B	1037.71	1.15322	0.189677	6.0799	1.20255e-09	2.01335e-08
CEBPD	295.397	-4.27635	0.703564	-6.07812	1.21597e-09	2.03429e-08
RP3.340N1.2	2.99873	-5.62067	0.924888	-6.07714	1.22344e-09	2.04367e-08
TM7SF2	63.6832	1.86772	0.307354	6.07675	1.2264e-09	2.04707e-08
CLSTN3	105.985	2.30335	0.379109	6.07568	1.23462e-09	2.05923e-08
CHST15	298.047	-4.91971	0.809778	-6.07538	1.23695e-09	2.06155e-08
N6AMT2	42.1369	1.62449	0.267395	6.07523	1.23812e-09	2.06194e-08
HCAR3	307.161	-4.36028	0.71789	-6.07374	1.24964e-09	2.07955e-08
ZNF280C	44.8541	1.79752	0.296147	6.06968	1.28162e-09	2.12957e-08
FUNDC1	110.382	1.43245	0.236016	6.06931	1.28462e-09	2.13293e-08
FGD3	649.371	-1.23184	0.203022	-6.06751	1.29912e-09	2.15376e-08
PELP1	59.6593	1.52827	0.251875	6.06756	1.29868e-09	2.15376e-08
SPTA1	39.8051	3.15031	0.519244	6.06711	1.30228e-09	2.15739e-08
EHD2	127.757	4.79716	0.790708	6.06692	1.30387e-09	2.15839e-08
ANXA5	2318.14	-3.9494	0.651137	-6.06539	1.3163e-09	2.17733e-08
MYO9B	540.49	-1.72958	0.285181	-6.06486	1.32067e-09	2.18292e-08
CTD.3187F8.15	2.76276	-5.34233	0.881035	-6.0637	1.33029e-09	2.19718e-08
LIMD2	926.385	-1.21663	0.200654	-6.06332	1.33338e-09	2.20063e-08
IL1A	4.35326	-5.16746	0.85235	-6.06261	1.33932e-09	2.20877e-08
MAPK12	36.4938	2.58822	0.427107	6.05989	1.36213e-09	2.24471e-08
SLC18A2	165.247	3.15934	0.521662	6.0563	1.39292e-09	2.29374e-08
BIRC3	601.138	-2.39095	0.394823	-6.05574	1.39772e-09	2.29992e-08
HERC2	153.533	1.27232	0.210265	6.05104	1.43913e-09	2.36629e-08
CMTM6	2168.54	-1.1968	0.197835	-6.04948	1.45312e-09	2.38752e-08
KB.1471A8.1	7.09686	3.49386	0.57758	6.04914	1.45624e-09	2.39086e-08
EEF1E1	90.1631	1.31556	0.217545	6.04729	1.47303e-09	2.41626e-08
SHF	20.1867	2.26719	0.374917	6.04719	1.47391e-09	2.41626e-08
RHBDF2	407.484	-2.22536	0.368007	-6.04707	1.47503e-09	2.4163e-08
ZNF426	223.821	1.15415	0.190878	6.04652	1.48005e-09	2.42272e-08
C3orf33	41.6239	2.08992	0.345692	6.0456	1.48856e-09	2.43484e-08
ZNF134	395.593	1.48211	0.245161	6.04547	1.48977e-09	2.43502e-08
RP13.516M14.2	4.70606	-4.43481	0.733685	-6.04458	1.49803e-09	2.4467e-08
TAGAP	2071.05	-1.89137	0.313095	-6.04089	1.53267e-09	2.49773e-08
WIPI1	125.568	-2.68358	0.444348	-6.03937	1.54714e-09	2.51944e-08
RP11.848P1.3	4.11933	-5.22552	0.865602	-6.03686	1.57144e-09	2.55713e-08
CLEC1A	4.11934	-5.45995	0.904595	-6.03579	1.58183e-09	2.57214e-08
TRBV27	39.3421	4.98324	0.825724	6.035	1.58967e-09	2.58297e-08
ZNF227	75.2015	1.3848	0.229477	6.03459	1.59368e-09	2.58759e-08
RP11.211G3.2	21.3563	-3.47816	0.576501	-6.03322	1.60724e-09	2.60576e-08
TSPAN14	1103.73	-2.11839	0.351117	-6.03328	1.60663e-09	2.60576e-08
BDH2	91.8436	1.20358	0.199516	6.03249	1.61457e-09	2.61573e-08
AIFM3	27.5529	-2.50865	0.416216	-6.02728	1.66739e-09	2.69931e-08
SUPT3H	87.629	1.61011	0.267149	6.02703	1.67005e-09	2.70163e-08
RP11.1023L17.1	27.996	1.72666	0.28669	6.02274	1.71487e-09	2.7721e-08
ZNF428	46.038	1.20635	0.200342	6.02147	1.72841e-09	2.79195e-08
VDR	138.985	-3.42374	0.568782	-6.01942	1.75042e-09	2.82542e-08
CSTF3	161.584	1.38571	0.230258	6.01807	1.76504e-09	2.84693e-08
RP11.421L21.3	45.1339	2.21799	0.368984	6.01109	1.84283e-09	2.97023e-08
TMEM67	69.389	2.57631	0.428602	6.01096	1.84423e-09	2.97031e-08
RP13.452N2.1	11.9315	-4.01729	0.668612	-6.00839	1.8737e-09	3.01557e-08
RP1.39G22.7	66.0903	1.43717	0.239282	6.00618	1.89941e-09	3.05472e-08
DEDD2	550.194	-1.70527	0.283933	-6.00589	1.90279e-09	3.05793e-08
SIRPB2	457.202	-3.87122	0.644664	-6.00502	1.9131e-09	3.07225e-08
MTCH1	1221.77	-1.14402	0.190627	-6.00137	1.95663e-09	3.13988e-08
CLEC4F	10.4704	-7.34436	1.22399	-6.00034	1.96906e-09	3.15522e-08
DPYD	902.362	-1.68028	0.280092	-5.99902	1.98516e-09	3.17871e-08
RNF141	468.503	-1.3013	0.21693	-5.99871	1.98889e-09	3.18236e-08
TSC22D1	2512.93	2.38978	0.398462	5.99751	2.00364e-09	3.20365e-08
CARD14	4.35826	-4.77168	0.79579	-5.99615	2.02045e-09	3.22594e-08
ZSWIM4	40.471	-1.65336	0.275738	-5.99615	2.02051e-09	3.22594e-08
RP11.18I14.10	89.3174	1.39815	0.233188	5.9958	2.02481e-09	3.23045e-08
IL13RA1	822.927	-3.0475	0.508393	-5.99438	2.04269e-09	3.25662e-08
ABCC1	206.124	1.58331	0.264178	5.99333	2.05591e-09	3.27534e-08
EPN1	115.538	-1.382	0.23061	-5.9928	2.06258e-09	3.28359e-08
CPQ	331.165	-1.92072	0.320578	-5.99144	2.07993e-09	3.30881e-08
ZNF419	57.2462	2.39663	0.400057	5.99073	2.08905e-09	3.32093e-08
ASAP1	269.372	-2.09836	0.350286	-5.9904	2.0932e-09	3.32512e-08
TRIM45	36.6215	2.13816	0.357016	5.98898	2.11166e-09	3.35203e-08
ZNF703	30.9406	-4.78229	0.799147	-5.98425	2.17389e-09	3.44834e-08
DKC1	600.391	1.2628	0.211052	5.98336	2.18576e-09	3.46467e-08
NUP107	362.42	1.11302	0.186034	5.98289	2.19209e-09	3.4722e-08
OAS1	562.087	-2.90141	0.485005	-5.98224	2.20091e-09	3.48367e-08
SPTBN1	518.998	2.39825	0.400949	5.98145	2.21165e-09	3.49816e-08
RP11.452L6.1	22.6317	2.27801	0.380885	5.98083	2.22001e-09	3.50885e-08
CTD.2653D5.1	3.22158	-4.44925	0.74395	-5.98057	2.22355e-09	3.51193e-08
ADAM22	20.8379	3.69348	0.617731	5.97912	2.24352e-09	3.54093e-08
RP11.217B7.2	14.2463	-3.4946	0.584483	-5.97896	2.24568e-09	3.54181e-08
IRAK1	533.952	-1.56766	0.262238	-5.978	2.25893e-09	3.56016e-08
C15orf39	579.706	-1.69558	0.283767	-5.97524	2.29753e-09	3.61841e-08
FAM69B	31.7812	3.67587	0.61532	5.97391	2.31632e-09	3.64539e-08
CUEDC1	20.2368	-3.21387	0.538008	-5.97364	2.32021e-09	3.64891e-08
ABCD4	337.703	1.04772	0.175528	5.96894	2.38801e-09	3.75286e-08
MAP2K3	1167.3	-1.52737	0.255895	-5.96873	2.39109e-09	3.75502e-08
SCCPDH	824.23	1.1359	0.190353	5.9673	2.41211e-09	3.78532e-08
ITGA6	245.337	2.88933	0.484379	5.96503	2.44586e-09	3.83483e-08
CAMKK1	87.4566	-2.36329	0.396196	-5.96495	2.44713e-09	3.83483e-08
PMS1	195.497	1.52226	0.255222	5.96444	2.45481e-09	3.83874e-08
KIAA1211	8.21825	5.99174	1.00458	5.96442	2.455e-09	3.83874e-08
AC004840.9	16.1124	2.98301	0.500133	5.96443	2.45487e-09	3.83874e-08
PLEKHG2	304.008	-1.97528	0.331183	-5.96432	2.4566e-09	3.83874e-08
CNEP1R1	211.71	-1.61031	0.270044	-5.96314	2.47431e-09	3.86368e-08
C7orf41	221.575	2.334	0.391444	5.96254	2.48353e-09	3.87532e-08
ENTPD1	300.044	-2.18097	0.365859	-5.96122	2.50355e-09	3.90381e-08
GUCY2C	3.37803	-5.51311	0.924924	-5.96061	2.51296e-09	3.9157e-08
HAVCR2	356.508	-2.71084	0.455006	-5.9578	2.55662e-09	3.98092e-08
LINC00324	28.219	-2.3134	0.388308	-5.95763	2.55927e-09	3.98223e-08
SAT2	281.577	-1.34697	0.226215	-5.95435	2.61102e-09	4.05988e-08
ACVRL1	10.1637	-5.7141	0.959684	-5.95415	2.61427e-09	4.06207e-08
MYO1G	1650.63	-1.54268	0.259129	-5.95331	2.62774e-09	4.08013e-08
RPGRIP1	14.278	-3.72793	0.626373	-5.95162	2.65505e-09	4.11672e-08
SEC14L1	627.242	-1.57631	0.264853	-5.95165	2.65456e-09	4.11672e-08
ITGAL	861.375	-2.20401	0.370339	-5.95133	2.65968e-09	4.12101e-08
ZNF506	121.426	1.2719	0.213795	5.94915	2.69547e-09	4.17352e-08
S100P	179.962	-6.53834	1.09965	-5.94585	2.75028e-09	4.25188e-08
RP11.63P12.6	19.8426	-3.30835	0.556411	-5.94587	2.74993e-09	4.25188e-08
PKN3	51.0046	2.93921	0.494347	5.94564	2.75379e-09	4.25188e-08
TATDN1	147.037	1.04016	0.174952	5.94542	2.75751e-09	4.25464e-08
SYNJ1	129.722	-1.48986	0.250651	-5.94396	2.78223e-09	4.28977e-08
TSEN2	116.984	2.07268	0.348746	5.94325	2.7942e-09	4.30521e-08
IRF5	941.846	-1.60066	0.269436	-5.94079	2.83657e-09	4.36745e-08
PLEKHB2	1518.37	-1.37364	0.231235	-5.94046	2.84225e-09	4.37313e-08
SLC12A9	172.987	-2.11446	0.355996	-5.93954	2.85816e-09	4.39454e-08
STYK1	15.0228	5.84612	0.984348	5.93908	2.86633e-09	4.40097e-08
ZNF776	157.82	1.56992	0.264674	5.93151	3.00156e-09	4.60539e-08
POLE	180.475	1.31236	0.22126	5.93128	3.00589e-09	4.60882e-08
N6AMT1	37.2942	2.20182	0.371409	5.9283	3.06095e-09	4.68673e-08
WDR6	568.121	1.43388	0.241889	5.92785	3.06919e-09	4.69607e-08
SUGT1P	8.89298	2.88691	0.487339	5.92383	3.14526e-09	4.80877e-08
PRPF39	326.01	1.00189	0.169131	5.92373	3.14721e-09	4.80877e-08
RAD51.AS1	80.2586	1.51358	0.255522	5.92349	3.15175e-09	4.81237e-08
CCDC138	62.9997	1.86796	0.315379	5.92289	3.16332e-09	4.82669e-08
SLC22A18AS	4.86484	-4.42167	0.746579	-5.92258	3.16928e-09	4.83244e-08
PLEKHA5	125.313	2.25984	0.381762	5.91949	3.2294e-09	4.92071e-08
AQP9	202.374	-6.18341	1.04461	-5.91937	3.23185e-09	4.92104e-08
FBXW5	584.869	-1.02127	0.172555	-5.91853	3.24831e-09	4.93928e-08
HLA.A	5235.64	-1.54555	0.261161	-5.91799	3.25896e-09	4.95205e-08
NARG2	334.012	1.25538	0.212136	5.91778	3.26309e-09	4.95491e-08
ZFP36L1	2423.23	-3.61236	0.610504	-5.91701	3.27844e-09	4.97479e-08
GAS5	996.146	1.49508	0.252713	5.91614	3.29582e-09	4.99772e-08
ATP6V1F	879.178	-1.51287	0.255745	-5.91555	3.30775e-09	5.01236e-08
SIGLEC11	7.80048	-6.22385	1.05234	-5.91429	3.33306e-09	5.04723e-08
SLC27A3	212.613	-2.12613	0.359595	-5.91255	3.3685e-09	5.0974e-08
RAD18	145.683	1.33421	0.22572	5.91092	3.40203e-09	5.14461e-08
SLC7A1	113.315	1.46999	0.248775	5.90891	3.44389e-09	5.20433e-08
MAST4.AS1	7.57361	3.41855	0.578642	5.90789	3.46524e-09	5.22942e-08
HPS4	380.218	1.1101	0.1879	5.90794	3.4642e-09	5.22942e-08
PIBF1	273.83	1.2357	0.209176	5.90748	3.47388e-09	5.23888e-08
TMEM175	234.516	-1.07615	0.182175	-5.90722	3.47925e-09	5.24338e-08
TEX9	14.8559	2.96538	0.502082	5.90617	3.50154e-09	5.27337e-08
FAHD2A	83.3805	1.17878	0.199598	5.90575	3.51041e-09	5.28311e-08
IL8	8960.98	-3.18023	0.539073	-5.89943	3.64759e-09	5.47835e-08
RP11.848G14.5	12.6998	-2.92143	0.495223	-5.89923	3.65205e-09	5.48131e-08
CD1A	8.99615	-6.51096	1.10384	-5.89846	3.66908e-09	5.48445e-08
HLA.G	61.2316	-2.36876	0.401567	-5.89881	3.66138e-09	5.48445e-08
MAP7	166.849	2.69759	0.457335	5.8985	3.66812e-09	5.48445e-08
PRIM1	161.522	1.80582	0.306149	5.89849	3.66837e-09	5.48445e-08
UNC119B	131.498	1.94817	0.330268	5.89877	3.66212e-09	5.48445e-08
NLRP1	929.199	-2.16791	0.367537	-5.89848	3.66872e-09	5.48445e-08
IQGAP1	2101.24	-1.71717	0.291239	-5.89608	3.72246e-09	5.55671e-08
LIN9	52.6582	1.8518	0.31416	5.89445	3.75924e-09	5.60401e-08
DMXL2	631.979	-2.79716	0.474904	-5.88993	3.86348e-09	5.75552e-08
CCDC104	96.9855	1.81912	0.308875	5.8895	3.87366e-09	5.76678e-08
GLB1	899.275	-1.18368	0.201108	-5.8858	3.96142e-09	5.88947e-08
SPG20	938.061	1.06941	0.181691	5.88586	3.95995e-09	5.88947e-08
NUBPL	57.9708	1.93993	0.329709	5.88376	4.01053e-09	5.95846e-08
BACH1	956.334	-1.6921	0.287644	-5.88263	4.03797e-09	5.99519e-08
ITGA9	76.0551	3.25247	0.552923	5.88232	4.04549e-09	6.00231e-08
PPFIBP2	113.35	-3.45056	0.586688	-5.88142	4.0675e-09	6.03056e-08
IL10	43.6072	-5.18774	0.882144	-5.88084	4.08199e-09	6.04425e-08
DCAF13	502.604	1.29649	0.220515	5.87936	4.11844e-09	6.09003e-08
FOS	55846	-1.35644	0.230709	-5.87945	4.11627e-09	6.09003e-08
C7orf43	32.6808	-1.49894	0.254961	-5.87907	4.12567e-09	6.09256e-08
PDE6H	10.4222	-5.00049	0.850547	-5.87915	4.12386e-09	6.09256e-08
FASTKD2	300.48	1.028	0.174861	5.87893	4.12923e-09	6.09373e-08
PLAC8	1695.48	-1.8381	0.312686	-5.87843	4.14176e-09	6.10813e-08
LRRCC1	89.7265	2.28569	0.389008	5.87568	4.21099e-09	6.20607e-08
ZC3H12A	503.604	-2.11896	0.360665	-5.87514	4.22493e-09	6.22246e-08
MIR4530	3.39091	-3.66618	0.624042	-5.87489	4.23117e-09	6.22748e-08
AGPAT5	212.256	1.70312	0.289968	5.87346	4.26779e-09	6.27719e-08
EHBP1	110.032	1.65621	0.281995	5.8732	4.27464e-09	6.28306e-08
INSIG1	1404.84	-1.63936	0.279191	-5.87183	4.31021e-09	6.33112e-08
PYCARD	338.196	-1.63951	0.279243	-5.87127	4.32463e-09	6.34808e-08
CSTF1	153.906	1.18211	0.201346	5.87106	4.33025e-09	6.35209e-08
RTKN	44.227	2.93129	0.499348	5.87025	4.35146e-09	6.37896e-08
HRH2	199.685	-2.82095	0.480618	-5.86942	4.37329e-09	6.4067e-08
HSPG2	37.0122	2.72023	0.463649	5.867	4.43757e-09	6.49654e-08
BOLA3.AS1	24.0712	3.69357	0.629641	5.86615	4.46018e-09	6.52098e-08
CD63	3434.31	-1.34491	0.229271	-5.86603	4.46362e-09	6.52167e-08
RP11.404O13.5	25.4255	-8.7435	1.49095	-5.86438	4.5081e-09	6.5823e-08
MMP28	21.8091	4.64278	0.791888	5.86292	4.5479e-09	6.63601e-08
HLA.E	8445.77	-1.49644	0.255404	-5.8591	4.65387e-09	6.78616e-08
AC009061.1	2.71597	-4.65626	0.794839	-5.85812	4.68137e-09	6.81828e-08
SLC39A3	278.203	1.55182	0.264903	5.85809	4.6821e-09	6.81828e-08
AIM2	30.4724	-5.48337	0.93668	-5.85404	4.79767e-09	6.98197e-08
VAMP3	762.464	-1.3172	0.225013	-5.85385	4.80311e-09	6.98527e-08
MXD1	1907.86	-1.94444	0.332212	-5.85301	4.82765e-09	7.01633e-08
MICB	72.8686	-1.30471	0.222935	-5.85244	4.8442e-09	7.03574e-08
ARID1B	310.609	1.39477	0.238359	5.85155	4.87014e-09	7.06876e-08
ZNF33B.1	122.16	2.20852	0.377473	5.85082	4.89165e-09	7.09531e-08
DIMT1	303.931	1.0921	0.186663	5.85065	4.89655e-09	7.09774e-08
RP11.324E6.6	11.9824	-4.60345	0.786849	-5.85049	4.90115e-09	7.09974e-08
TXNDC11	498.593	-1.70756	0.291928	-5.84925	4.93785e-09	7.14821e-08
RP11.126K1.2	9.37926	-2.45033	0.419059	-5.84723	4.9984e-09	7.2311e-08
CTC.378H22.1	24.7633	-3.30115	0.564714	-5.84572	5.04397e-09	7.28746e-08
LIG3	185.061	1.17297	0.200676	5.84509	5.06294e-09	7.31007e-08
RNF149	1324.72	-1.46186	0.250118	-5.8447	5.07467e-09	7.32222e-08
CDC42EP4	103.302	-2.36724	0.405145	-5.84295	5.12839e-09	7.39488e-08
NOP56	807.627	1.11415	0.190731	5.84147	5.17429e-09	7.45619e-08
LITAF	2451.13	-1.97066	0.33739	-5.84089	5.19227e-09	7.47721e-08
SRGAP2C	11.0156	-2.19589	0.376133	-5.83806	5.28131e-09	7.5955e-08
CRIP1.1	4.50603	-2.70833	0.464122	-5.83538	5.36691e-09	7.71323e-08
HIC1	11.145	-3.78672	0.648935	-5.83528	5.37017e-09	7.71323e-08
UNC5A	3.12624	-5.6812	0.973667	-5.83485	5.38394e-09	7.72293e-08
CASKIN2	8.11762	3.4787	0.596295	5.83386	5.41583e-09	7.76364e-08
QKI	317.636	-1.04623	0.179363	-5.83299	5.44423e-09	7.79927e-08
RN7SL124P	4.98257	-6.15649	1.05568	-5.83179	5.48361e-09	7.85057e-08
TCF7L2	334.943	-2.17439	0.372882	-5.83131	5.49953e-09	7.86825e-08
CTD.2659N19.9	3.51938	-5.14953	0.883473	-5.82873	5.58501e-09	7.98537e-08
SNX30	158.184	-2.17653	0.373499	-5.82741	5.62952e-09	8.04378e-08
RP5.874C20.3	109.726	1.77527	0.304705	5.8262	5.67031e-09	8.09682e-08
SIRT5	94.9379	1.53576	0.263743	5.82293	5.78236e-09	8.25148e-08
RNF144B	456.981	-2.87848	0.494419	-5.82194	5.8168e-09	8.28453e-08
ZNF568	58.4696	1.89113	0.324827	5.82195	5.81659e-09	8.28453e-08
ZNF93	102.199	1.78866	0.307334	5.81992	5.88772e-09	8.38011e-08
EMP3	2591.15	-1.59337	0.2738	-5.81946	5.9038e-09	8.39758e-08
PTPLAD1	427.228	1.83236	0.315034	5.81638	6.01354e-09	8.54815e-08
GSTK1	1907.23	-1.04225	0.179227	-5.81526	6.05387e-09	8.59439e-08
PHF14	143.157	1.39785	0.240382	5.81513	6.05884e-09	8.59591e-08
ZNF529	131.226	1.4583	0.250825	5.81401	6.09936e-09	8.64783e-08
AGFG1	171.757	-1.73037	0.297684	-5.8128	6.1438e-09	8.70523e-08
HERC2P2	131.135	1.90992	0.328588	5.8125	6.15456e-09	8.71487e-08
NOC3L	102.054	1.86292	0.320511	5.81233	6.16081e-09	8.71812e-08
MYO7A	44.8846	-5.03391	0.866199	-5.8115	6.19147e-09	8.75589e-08
GPR132	189.146	-2.64121	0.454612	-5.8098	6.25468e-09	8.83959e-08
SIGLEC5	29.054	-3.10541	0.534674	-5.80804	6.32079e-09	8.92159e-08
GABARAPL1	838.611	-2.41647	0.416149	-5.80674	6.37007e-09	8.98539e-08
CTC.297N7.9	5.32565	3.47081	0.598195	5.80213	6.54772e-09	9.23007e-08
SPPL2A	464.895	-1.32081	0.227662	-5.80163	6.56741e-09	9.2519e-08
RP4.673M15.1	26.5071	-2.5744	0.444019	-5.79795	6.71315e-09	9.45117e-08
USB1	422.687	-1.01145	0.174562	-5.79422	6.86375e-09	9.65087e-08
CBX2	89.5149	3.74608	0.646707	5.79255	6.9326e-09	9.73525e-08
MMS22L	122.625	1.21978	0.210604	5.79181	6.96332e-09	9.77215e-08
RP11.45M22.5	25.7116	-2.23702	0.386274	-5.79128	6.98529e-09	9.79674e-08
ZNF84	15.8648	1.50425	0.25976	5.79093	6.99983e-09	9.81089e-08
FAM229B	25.0336	3.17026	0.547613	5.78923	7.07079e-09	9.89236e-08
LL22NC03.2H8.5	59.4168	2.06494	0.356688	5.78922	7.07142e-09	9.89236e-08
ADPGK.AS1	47.3812	-1.57512	0.272098	-5.78881	7.08849e-09	9.90995e-08
LINC00677	2.56833	-5.27525	0.911742	-5.78591	7.21215e-09	1.007e-07
VPREB1	53.2541	7.31159	1.26376	5.78561	7.22514e-09	1.00818e-07
RP11.490O6.2	19.9665	-2.59403	0.44843	-5.78469	7.26482e-09	1.01307e-07
CTD.2531D15.4	2.80185	-4.82744	0.834617	-5.78402	7.29357e-09	1.01644e-07
C1orf122	66.3384	-1.25882	0.217663	-5.78338	7.32165e-09	1.01971e-07
CAMP	12.8441	-5.62308	0.97233	-5.7831	7.33355e-09	1.02072e-07
MYCT1	35.6155	6.9938	1.20942	5.78275	7.34888e-09	1.02221e-07
FAM157C	15.9904	-3.4638	0.599456	-5.77824	7.54862e-09	1.04933e-07
RAD51C	165.207	1.01851	0.176315	5.77665	7.62042e-09	1.05864e-07
CAMTA2	99.2326	-1.43361	0.248251	-5.77485	7.70194e-09	1.06929e-07
MVP	1232.67	-1.79863	0.311524	-5.77364	7.75761e-09	1.07567e-07
P4HB	2226.32	-1.21783	0.210927	-5.77369	7.75522e-09	1.07567e-07
SIRPAP1	6.85865	-4.52825	0.784501	-5.77214	7.82688e-09	1.08459e-07
FAM65B	1311.71	-2.15019	0.372675	-5.76962	7.94489e-09	1.10025e-07
HIBCH	195.392	1.83798	0.318618	5.7686	7.99321e-09	1.10555e-07
MRPL45	189.611	1.18235	0.20496	5.76869	7.98892e-09	1.10555e-07
HIVEP3	189.081	-1.73664	0.301072	-5.76819	8.01253e-09	1.10753e-07
NOL8	409.997	1.27127	0.220436	5.76709	8.06512e-09	1.1141e-07
GFRA2	15.3895	-5.67289	0.983827	-5.76614	8.11063e-09	1.11968e-07
OSTM1	286.602	-1.98976	0.345153	-5.76488	8.17163e-09	1.1274e-07
RP11.330C7.3	18.9581	-3.06144	0.531098	-5.76437	8.19646e-09	1.13012e-07
ADAT2	93.7377	1.6288	0.282591	5.76382	8.22333e-09	1.13311e-07
DNAJC6	58.4216	4.6815	0.812622	5.76098	8.3626e-09	1.15158e-07
MKRN1	1546.19	-1.34291	0.233126	-5.76045	8.38917e-09	1.15452e-07
PRMT5	219.361	1.40616	0.244268	5.75664	8.58071e-09	1.18014e-07
RP11.305O6.3	25.6268	2.81374	0.488853	5.7558	8.62329e-09	1.18526e-07
ARHGAP24	97.6069	-5.68876	0.988991	-5.75208	8.81502e-09	1.2101e-07
GPATCH4	128.993	1.42216	0.24733	5.75007	8.92051e-09	1.22382e-07
UBTD1	30.2905	-2.72366	0.473707	-5.74968	8.94141e-09	1.22516e-07
HIP1R	45.6799	3.03124	0.527444	5.74704	9.08211e-09	1.2429e-07
UNK	179.064	1.48462	0.258333	5.74692	9.08852e-09	1.243e-07
PKM	4734.9	-1.47219	0.256282	-5.7444	9.22502e-09	1.2601e-07
PPCDC	213.091	-1.25539	0.218549	-5.74419	9.23621e-09	1.26085e-07
AADAT	9.7412	5.70693	0.993626	5.74354	9.27157e-09	1.26489e-07
DROSHA	236.405	1.3869	0.241495	5.74299	9.302e-09	1.26826e-07
RP11.706O15.1	33.9441	1.83882	0.32033	5.74038	9.44668e-09	1.28719e-07
GPSM2	172.625	2.36699	0.412386	5.73975	9.48184e-09	1.29118e-07
VPS37C	83.6951	-1.53636	0.267699	-5.73912	9.51697e-09	1.29517e-07
C19orf48	438.01	1.64254	0.28627	5.73774	9.59502e-09	1.30418e-07
PHLDA1	359.793	-3.17033	0.55256	-5.73752	9.60705e-09	1.30501e-07
TET3	112.456	-1.29659	0.22606	-5.73559	9.71724e-09	1.31916e-07
LINC00968	10.5513	-3.45137	0.601774	-5.73533	9.73255e-09	1.32043e-07
PARP2	256.128	1.33712	0.233174	5.73442	9.78483e-09	1.3267e-07
HK1	1217.59	-1.40999	0.245938	-5.73311	9.86055e-09	1.33615e-07
METTL5	292.697	1.04889	0.182969	5.7326	9.89015e-09	1.33933e-07
RP11.343N15.5	47.301	-1.92659	0.336152	-5.73131	9.96585e-09	1.34876e-07
DEPTOR	220.841	2.44088	0.425893	5.7312	9.97233e-09	1.34881e-07
SDCBP	4845.39	-1.37424	0.239859	-5.72936	1.00808e-08	1.36181e-07
C1orf85	73.8956	-1.58134	0.276079	-5.72785	1.01712e-08	1.37317e-07
RP11.798K23.5	11.0327	2.86185	0.499647	5.72774	1.01777e-08	1.37322e-07
FKBP11	55.4509	1.75332	0.306145	5.72707	1.02177e-08	1.37776e-07
ZNF260	97.775	1.66961	0.291538	5.7269	1.02282e-08	1.37834e-07
CRISPLD1	92.3014	4.2895	0.749033	5.72672	1.02394e-08	1.379e-07
GTF2I	212.761	1.16058	0.202707	5.72542	1.0318e-08	1.38874e-07
C11orf1	79.1734	1.84479	0.322219	5.72526	1.03275e-08	1.38917e-07
EPB41L3	227.324	-5.83953	1.02042	-5.72266	1.04869e-08	1.40974e-07
ZWILCH	145.826	1.55671	0.272056	5.722	1.05276e-08	1.41349e-07
SPHK1	132.73	-3.1765	0.555135	-5.72204	1.05256e-08	1.41349e-07
ODF2L	236.33	1.25945	0.220138	5.72118	1.05786e-08	1.41947e-07
FAM115A	29.2925	1.55673	0.272105	5.72105	1.05867e-08	1.4197e-07
RP11.213G2.1	3.36654	-5.1073	0.89351	-5.71599	1.09065e-08	1.46081e-07
CCDC66	141.371	1.20649	0.211148	5.71394	1.1039e-08	1.47766e-07
CACNA1C.AS2	12.4477	3.51353	0.615003	5.71304	1.10979e-08	1.48464e-07
ZNF432	100.378	1.34615	0.235664	5.71213	1.1157e-08	1.49164e-07
CD53	3134.64	-1.64104	0.287326	-5.71142	1.12038e-08	1.49699e-07
MTF2	790.211	1.29965	0.22772	5.70722	1.14835e-08	1.53344e-07
PLSCR1	911.033	-1.84767	0.323947	-5.70362	1.17287e-08	1.56197e-07
GPX3	45.6123	-3.88522	0.681203	-5.70347	1.17395e-08	1.56197e-07
ALOX5AP	635.752	-3.21227	0.563202	-5.7036	1.17307e-08	1.56197e-07
IGHM	845.994	4.82122	0.845315	5.70346	1.17397e-08	1.56197e-07
ADAM9	418.801	-2.02203	0.354638	-5.70169	1.18624e-08	1.57734e-07
C11orf74	95.7521	1.60715	0.281906	5.70101	1.19097e-08	1.58267e-07
ZHX1	345.752	1.04664	0.183634	5.69961	1.2008e-08	1.59477e-07
NAPA	706.432	-1.31526	0.230797	-5.69876	1.2068e-08	1.60177e-07
GMCL1	241.623	1.40716	0.24693	5.69862	1.20779e-08	1.60213e-07
ARSG	36.4989	-3.75066	0.658239	-5.69803	1.21203e-08	1.60678e-07
PCDH20	0.88046	22.6739	3.9798	5.69724	1.21759e-08	1.61318e-07
ATF5	45.2847	-1.96404	0.344758	-5.69686	1.22036e-08	1.61588e-07
SLC2A3	3866.78	-2.75777	0.484273	-5.69465	1.23623e-08	1.6359e-07
TRMT10C	233.224	1.08141	0.189968	5.69258	1.25133e-08	1.65489e-07
SPICE1	158.525	1.46023	0.256539	5.69205	1.25523e-08	1.65806e-07
LONRF3	65.1106	-3.47867	0.611144	-5.69206	1.25515e-08	1.65806e-07
NME1	195.79	1.47478	0.259101	5.6919	1.25633e-08	1.65852e-07
KLHL9	392.035	1.12624	0.197908	5.69072	1.26505e-08	1.66904e-07
SSX2IP	207.246	1.84337	0.323965	5.69001	1.27033e-08	1.67499e-07
CAPN11	37.2166	3.27292	0.575256	5.68951	1.27408e-08	1.67793e-07
RP3.510H16.3	12.4428	-3.2738	0.575649	-5.68715	1.29174e-08	1.69915e-07
ZC3H8	91.9952	1.42843	0.251238	5.68556	1.30384e-08	1.71405e-07
DHRS11	66.6606	2.21553	0.389771	5.68418	1.31441e-08	1.72691e-07
LINC00342	29.1351	2.3022	0.405195	5.68169	1.33368e-08	1.75015e-07
PPP1R12C	52.4314	-1.47619	0.260011	-5.67741	1.36749e-08	1.79345e-07
AC009303.1	11.1477	-2.18576	0.38512	-5.67555	1.38246e-08	1.81093e-07
FKBP7	45.483	2.03249	0.358121	5.67543	1.38342e-08	1.81111e-07
AC097500.2	10.7595	2.47679	0.436435	5.67506	1.38637e-08	1.81389e-07
GCAT	59.9239	2.55254	0.449916	5.67338	1.40008e-08	1.82965e-07
ITGB3BP	112.426	1.25662	0.221535	5.67232	1.40874e-08	1.83879e-07
GRPEL1	501.272	-1.66714	0.293966	-5.67121	1.41796e-08	1.84972e-07
HLA.B	12967.2	-1.97087	0.347532	-5.67104	1.41934e-08	1.85043e-07
PDE6B	85.9682	1.75569	0.309626	5.67037	1.42491e-08	1.8566e-07
COL24A1	341.831	2.60017	0.458626	5.66948	1.43231e-08	1.86514e-07
GK.IT1	12.0808	-2.94789	0.520117	-5.66774	1.44692e-08	1.88305e-07
CMBL	83.1677	3.06378	0.540751	5.6658	1.46344e-08	1.90342e-07
QPCT	224.417	-4.08575	0.721183	-5.66534	1.46729e-08	1.90731e-07
EIF3J.AS1	98.135	1.45166	0.256368	5.66241	1.49265e-08	1.93913e-07
RP11.408O19.5	2.97869	-4.27307	0.754725	-5.66175	1.49837e-08	1.94541e-07
HS1BP3	236.832	-1.12985	0.199564	-5.6616	1.49969e-08	1.94592e-07
DTWD1	145.038	1.07932	0.190642	5.6615	1.50053e-08	1.94592e-07
TCTEX1D4	30.7397	-2.23572	0.394965	-5.66054	1.50893e-08	1.95567e-07
THAP2	106.786	-1.90477	0.336555	-5.65961	1.5172e-08	1.96522e-07
AC113189.5	30.2723	-2.82664	0.499528	-5.65861	1.52604e-08	1.97551e-07
ARL4A	1241.91	-1.57447	0.278262	-5.65823	1.5294e-08	1.97762e-07
PARVG	1429.72	-1.1035	0.195026	-5.65823	1.52946e-08	1.97762e-07
LUC7L3	1159.96	1.09105	0.192883	5.65656	1.54438e-08	1.99574e-07
FAM124B	139.416	1.59354	0.281744	5.65598	1.54959e-08	2.0013e-07
XKR8	96.9671	-1.92678	0.340672	-5.65581	1.55113e-08	2.00211e-07
SLC1A3	66.6162	-3.17204	0.560918	-5.65508	1.55774e-08	2.0083e-07
PHOSPHO1	10.9538	-5.30743	0.938522	-5.6551	1.55756e-08	2.0083e-07
OS9	1366.43	-1.0617	0.187795	-5.65348	1.5723e-08	2.02469e-07
LILRB5	11.7997	-5.77779	1.02249	-5.65072	1.59781e-08	2.05634e-07
ID2	3375.26	-2.62789	0.465083	-5.65036	1.60111e-08	2.05855e-07
FARSB	418.518	1.334	0.236093	5.65033	1.6014e-08	2.05855e-07
TRMT13	94.3312	1.49516	0.264679	5.64896	1.61423e-08	2.07384e-07
TM9SF4	713.812	-1.10488	0.195602	-5.64861	1.61749e-08	2.07681e-07
POMGNT1	196.664	1.38615	0.245498	5.64629	1.6395e-08	2.10385e-07
CDKN2B	35.9415	-5.2389	0.928091	-5.64481	1.65361e-08	2.12072e-07
BIVM	72.6041	3.57638	0.633693	5.64371	1.66429e-08	2.13317e-07
PCED1B.AS1	27.4507	-3.57357	0.633219	-5.6435	1.66626e-08	2.13446e-07
ME3	134.353	2.63769	0.467575	5.64122	1.68852e-08	2.16046e-07
SUV39H2	51.433	1.99544	0.353771	5.64048	1.69578e-08	2.16849e-07
HMHA1	1860.74	-1.26546	0.224369	-5.64009	1.69965e-08	2.17218e-07
OSR2	78.1339	-4.70112	0.833648	-5.63922	1.70821e-08	2.18186e-07
CSTA	558.493	-4.2616	0.755721	-5.63912	1.7092e-08	2.18186e-07
PLA2G16	31.9234	-4.34126	0.769868	-5.63896	1.71076e-08	2.18258e-07
RAC3	19.9387	3.80077	0.674052	5.63869	1.71353e-08	2.18485e-07
GALNS	190.46	-1.28876	0.228624	-5.63701	1.73033e-08	2.20499e-07
CTC.205M6.5	13.2456	-3.17988	0.564228	-5.63581	1.74238e-08	2.21906e-07
LAS1L	353.37	1.02213	0.181374	5.63548	1.7457e-08	2.22201e-07
NUDCD1	222.072	2.05495	0.364652	5.63538	1.74676e-08	2.22207e-07
SSPN	8.61615	4.916	0.872409	5.63497	1.7509e-08	2.22605e-07
AC009948.5	121.231	1.40472	0.249428	5.63176	1.78381e-08	2.26659e-07
AC093415.2	11.9755	3.30199	0.586378	5.63117	1.78996e-08	2.2731e-07
RNF130	2292.72	-1.23028	0.21849	-5.63082	1.79355e-08	2.27634e-07
KCNK5	98.9181	3.16143	0.561505	5.63027	1.7993e-08	2.28233e-07
UCP2	2902.03	-1.45094	0.257925	-5.62543	1.85043e-08	2.34583e-07
CD83	3253.07	-3.63056	0.645798	-5.62182	1.88957e-08	2.39407e-07
EXTL2	100.63	2.29894	0.40897	5.62128	1.89545e-08	2.40014e-07
TRIM38	561.496	-1.09364	0.194576	-5.62065	1.90244e-08	2.40761e-07
PELI1	1515.79	-2.34999	0.418115	-5.62044	1.90469e-08	2.40908e-07
RP11.620J15.3	250.226	2.12472	0.37807	5.6199	1.91066e-08	2.41385e-07
ZNF217	190.724	-1.30782	0.232709	-5.61997	1.90988e-08	2.41385e-07
GNPDA2	131.391	1.20222	0.21411	5.61499	1.96577e-08	2.48063e-07
THOP1	201.6	1.14143	0.203299	5.61455	1.97079e-08	2.48554e-07
GAMT	58.7425	2.35311	0.419255	5.6126	1.99306e-08	2.51076e-07
C2	53.7411	-4.8518	0.864561	-5.61186	2.00162e-08	2.5194e-07
SH2D3C	448.393	-1.48641	0.264872	-5.61181	2.00221e-08	2.5194e-07
ZC4H2	56.0514	2.07891	0.370503	5.61105	2.01107e-08	2.5291e-07
MYO5A	329.639	-1.62013	0.288786	-5.61013	2.02172e-08	2.53959e-07
MEGF8	23.4928	1.48527	0.264745	5.61021	2.02087e-08	2.53959e-07
PQLC3	619.138	-1.29608	0.231069	-5.60907	2.03418e-08	2.55379e-07
CYTH1	1165.27	-1.15712	0.20636	-5.60728	2.05527e-08	2.5788e-07
PLOD1	360.099	-1.72137	0.3071	-5.60525	2.0796e-08	2.60784e-07
FBXO6	144.888	-2.14562	0.382798	-5.60509	2.08147e-08	2.6087e-07
TMED5	681.481	-1.01293	0.180744	-5.60423	2.09179e-08	2.62015e-07
RP11.126O1.4	13.2346	-2.53546	0.452539	-5.60274	2.10988e-08	2.63981e-07
NOP10	701.994	-1.12724	0.201204	-5.60248	2.11311e-08	2.64085e-07
RP11.1023L17.2	25.4398	2.04872	0.365747	5.60147	2.12542e-08	2.65322e-07
AC006129.1	135.543	-2.04431	0.364998	-5.60088	2.13262e-08	2.66071e-07
AKAP13	1853.3	-1.16554	0.208108	-5.60066	2.13531e-08	2.66255e-07
NME7	112.069	2.13372	0.381012	5.60015	2.14168e-08	2.66748e-07
PUS7	105.019	2.1916	0.391386	5.59959	2.14864e-08	2.67312e-07
CLEC6A	5.49185	-6.0163	1.07441	-5.59961	2.1484e-08	2.67312e-07
LINC01032	3.75455	-4.71742	0.842509	-5.59926	2.15275e-08	2.67672e-07
IKZF2	31.3655	3.81227	0.681137	5.59692	2.18198e-08	2.71118e-07
TTYH2	155.555	-1.63598	0.292307	-5.5968	2.18344e-08	2.71118e-07
RP11.127L20.3	11.5825	-3.11353	0.556368	-5.59617	2.19135e-08	2.71859e-07
CCDC14	262.06	1.17563	0.210117	5.59511	2.20478e-08	2.73371e-07
CLIP3	21.689	4.00484	0.71624	5.59148	2.25146e-08	2.79001e-07
C5orf54	16.7346	3.85773	0.689954	5.59128	2.254e-08	2.79159e-07
ZNF184	150.76	1.71184	0.30634	5.58803	2.29664e-08	2.8428e-07
UBA6.AS1	56.9749	1.90404	0.340759	5.58763	2.30187e-08	2.84768e-07
EFNA1	58.7324	4.37524	0.783208	5.5863	2.31957e-08	2.86636e-07
KIAA0020	297.329	1.17951	0.211139	5.5864	2.31829e-08	2.86636e-07
PRNP	1587.36	-1.57113	0.281301	-5.58523	2.33391e-08	2.88246e-07
MCM7	1120.27	1.50207	0.268954	5.58485	2.33901e-08	2.88713e-07
RP11.412D9.4	5.03669	4.8575	0.869816	5.58451	2.34354e-08	2.89111e-07
MAPK11	19.1159	3.02567	0.541847	5.58401	2.35042e-08	2.89797e-07
GPR125	20.896	3.05452	0.547088	5.58324	2.36085e-08	2.90921e-07
CARF	70.4143	1.52683	0.273483	5.5829	2.36539e-08	2.91318e-07
ARPC5	2386.19	-1.35169	0.242197	-5.58097	2.39178e-08	2.94402e-07
MRP63	573.188	1.00307	0.179797	5.57889	2.42062e-08	2.97787e-07
FAIM	68.4312	2.10508	0.377341	5.57873	2.42277e-08	2.97885e-07
GUSBP4	10.1974	1.90283	0.341094	5.57861	2.42448e-08	2.97929e-07
DICER1.AS1	44.7559	1.51547	0.271708	5.57756	2.43922e-08	2.99573e-07
MRTO4	163.757	1.42312	0.255158	5.5774	2.44144e-08	2.99678e-07
PRKCH	273.847	2.17347	0.389825	5.57549	2.46832e-08	3.02809e-07
GS1.251I9.4	348.556	1.01837	0.182664	5.57512	2.47355e-08	3.03282e-07
TRO	70.5277	4.71886	0.846445	5.57492	2.47643e-08	3.03466e-07
ARHGAP23	13.3252	2.43057	0.436085	5.57363	2.49487e-08	3.05556e-07
AC079630.4	3.79405	-4.80786	0.86287	-5.57194	2.51914e-08	3.08356e-07
HCAR2	561.161	-4.05957	0.729015	-5.56857	2.56839e-08	3.14211e-07
PMS2P5	41.1406	2.00091	0.359352	5.5681	2.57529e-08	3.1488e-07
COMMD3	341.069	1.5642	0.281031	5.56592	2.60771e-08	3.18668e-07
ZNF592	248.385	-1.10834	0.199137	-5.56573	2.61058e-08	3.18841e-07
RP1.90J20.11	12.8528	-2.07236	0.372366	-5.56537	2.61594e-08	3.19319e-07
TIA1	654.46	1.16829	0.209933	5.56505	2.62077e-08	3.19731e-07
PA2G4	546.606	1.02812	0.184815	5.56298	2.65211e-08	3.23376e-07
PDK4	364.6	-5.97768	1.07459	-5.56274	2.65564e-08	3.23627e-07
UCK2	263.148	1.2743	0.229134	5.56139	2.67635e-08	3.2597e-07
DNAJC3	1048.42	-1.14664	0.206205	-5.56068	2.68721e-08	3.27112e-07
PLK3	1089.4	-2.02839	0.364803	-5.56024	2.69396e-08	3.27572e-07
ZNF512B	20.5114	2.11113	0.379763	5.55905	2.71241e-08	3.29634e-07
RHBDD2	474.271	-1.20629	0.217045	-5.55781	2.73187e-08	3.31815e-07
MRPS27	285.792	1.04845	0.188702	5.5561	2.75867e-08	3.34701e-07
SNX8	114.425	-1.62175	0.291898	-5.55589	2.76206e-08	3.34928e-07
MAGED1	430.522	1.88409	0.339183	5.55478	2.77964e-08	3.36874e-07
GRK6	162.639	-1.79139	0.322767	-5.5501	2.8551e-08	3.4583e-07
RP11.89H19.1	3.08975	-4.52388	0.815363	-5.54831	2.8845e-08	3.49199e-07
C5orf42	82.8631	1.63395	0.29456	5.54708	2.90486e-08	3.51471e-07
TIGD1	114.481	1.41769	0.255589	5.54675	2.91032e-08	3.51938e-07
NUCKS1	341.86	1.12379	0.202718	5.54363	2.96265e-08	3.5807e-07
C17orf76.AS1	876.886	1.64835	0.297415	5.54224	2.98632e-08	3.60732e-07
ZC3H12D	18.042	-2.01211	0.363058	-5.54211	2.98853e-08	3.60801e-07
MIB1	110.428	1.24098	0.223951	5.54129	3.00257e-08	3.62298e-07
SBF2	214.88	-1.59895	0.288564	-5.54104	3.00674e-08	3.62602e-07
SLC9B2	135.324	2.37867	0.429293	5.54089	3.00932e-08	3.62715e-07
DERL3	63.7427	2.68437	0.48456	5.53982	3.02789e-08	3.64754e-07
CCDC88C	353.957	-1.32785	0.239768	-5.53805	3.05864e-08	3.68257e-07
ZNF418	39.8188	2.98993	0.539904	5.53789	3.06132e-08	3.68378e-07
METRNL	124.839	-2.77779	0.501641	-5.53741	3.06971e-08	3.69187e-07
CORO1B	403.602	-1.51256	0.273239	-5.53569	3.10014e-08	3.72643e-07
RP3.473L9.4	2.40033	-4.20629	0.759956	-5.53492	3.11376e-08	3.74075e-07
STMN1	2514.87	2.4117	0.435759	5.53447	3.12163e-08	3.74816e-07
AIF1L	75.7545	4.84819	0.876182	5.53332	3.14225e-08	3.77087e-07
CTC.559E9.5	13.6036	2.17446	0.393061	5.53211	3.164e-08	3.7949e-07
LAMA3	24.7007	5.93585	1.07324	5.53076	3.18838e-08	3.82207e-07
FAM129B	61.1972	-3.12624	0.565297	-5.53026	3.19759e-08	3.83103e-07
FAM161A	22.548	2.37236	0.429153	5.52799	3.23914e-08	3.87869e-07
RBM4B	145.378	1.37183	0.248248	5.52603	3.2755e-08	3.9201e-07
ANKRD46	68.3038	2.01321	0.364342	5.52561	3.28335e-08	3.92737e-07
DYRK3	105.518	2.96826	0.537253	5.52488	3.29713e-08	3.94171e-07
DYNC2LI1	69.815	2.0363	0.368616	5.52416	3.31059e-08	3.95566e-07
SCN4B	10.2061	-6.50655	1.17816	-5.52262	3.33973e-08	3.98615e-07
ANAPC1	81.3867	1.48267	0.268557	5.52088	3.37314e-08	4.02379e-07
RP11.60I3.5	2.68203	4.05005	0.733601	5.52078	3.37492e-08	4.02379e-07
MKS1	102.55	1.71559	0.310788	5.52015	3.38718e-08	4.03404e-07
AC074138.3	14.4508	1.83212	0.331931	5.51959	3.398e-08	4.04256e-07
TRPV4	11.0645	-6.17089	1.11923	-5.51351	3.51752e-08	4.18023e-07
TWSG1	288.621	1.75714	0.318802	5.51171	3.55368e-08	4.22093e-07
ZGPAT	61.6899	-1.01537	0.184227	-5.51148	3.5582e-08	4.22402e-07
ATL1	50.6422	2.67701	0.485788	5.51066	3.57499e-08	4.24167e-07
CEP41	162.888	1.81068	0.328602	5.51026	3.58303e-08	4.24892e-07
AGK	203.866	1.01679	0.184535	5.50999	3.58861e-08	4.25324e-07
ANKRD54	256.169	1.03062	0.187049	5.50989	3.59053e-08	4.25324e-07
NIT2	385.248	1.11702	0.202749	5.50936	3.60146e-08	4.26389e-07
ST14	158.645	-4.3887	0.796777	-5.50806	3.628e-08	4.29294e-07
RP11.23P13.7	5.13071	-4.61553	0.837973	-5.50797	3.62989e-08	4.29294e-07
HSPBAP1	183.414	-1.14491	0.207904	-5.50695	3.65113e-08	4.31342e-07
ARVCF	29.2963	2.95985	0.537525	5.50643	3.6618e-08	4.32371e-07
PAPSS2	84.6393	-2.69679	0.489774	-5.50619	3.66689e-08	4.32508e-07
PRELID2	114.028	2.41811	0.43946	5.50245	3.74548e-08	4.41397e-07
OGFOD1	261.314	1.28689	0.233878	5.50241	3.74625e-08	4.41397e-07
SIGLEC22P	55.2693	-2.90823	0.52878	-5.49988	3.80051e-08	4.4755e-07
TMEM38A	23.658	-3.77712	0.686776	-5.49978	3.80268e-08	4.47567e-07
ZFP82	77.033	1.94206	0.353134	5.49951	3.8085e-08	4.48012e-07
RP11.519G16.3	3.08771	-5.29247	0.96268	-5.49765	3.84888e-08	4.52521e-07
RP11.312O7.2	6.04082	-2.99553	0.544998	-5.49642	3.87584e-08	4.55448e-07
FAM20A	25.6942	-4.08077	0.742573	-5.49545	3.89716e-08	4.57708e-07
TLR7	169.895	-5.00028	0.910261	-5.49324	3.94627e-08	4.63229e-07
ZNF140	70.3332	1.67706	0.305314	5.4929	3.95379e-08	4.63865e-07
MAP1A	171.569	3.33967	0.608132	5.49168	3.98131e-08	4.66846e-07
TTC27	362.344	2.58046	0.470063	5.48961	4.0283e-08	4.72104e-07
SLC36A1	125.545	-2.09983	0.382527	-5.48936	4.03393e-08	4.72355e-07
RP2	492.465	-1.16211	0.211703	-5.48932	4.03473e-08	4.72355e-07
NBPF18P	8.85043	-2.29619	0.418569	-5.4858	4.11613e-08	4.81629e-07
RP11.1082L8.4	4.34689	-4.44182	0.809989	-5.4838	4.16276e-08	4.86827e-07
RP11.17A1.3	7.24044	3.37455	0.615521	5.48243	4.19532e-08	4.89946e-07
MED17	331.118	1.01508	0.185153	5.48239	4.1961e-08	4.89946e-07
FOSL2	1515.83	-1.9786	0.360965	-5.48141	4.21959e-08	4.92427e-07
SSBP3	56.8956	1.20961	0.220748	5.47962	4.26251e-08	4.97172e-07
MAK16	135.579	1.0853	0.198065	5.4795	4.26523e-08	4.97227e-07
CH25H	34.3595	-6.57778	1.20078	-5.47793	4.30329e-08	5.01398e-07
TNK2.AS1	9.33219	-2.95478	0.539433	-5.47757	4.31198e-08	5.02145e-07
CYTIP	1288.14	-1.95739	0.357368	-5.47725	4.3199e-08	5.02802e-07
CCDC107	17.1394	-1.38315	0.252561	-5.47651	4.33787e-08	5.04627e-07
TRIM26	307.687	-1.032	0.188593	-5.4721	4.44742e-08	5.17097e-07
IFT172	88.6394	1.8888	0.345306	5.46994	4.50178e-08	5.23142e-07
RP13.476E20.1	2.44498	4.10761	0.751071	5.46901	4.52563e-08	5.25637e-07
MCM3AP.AS1	30.9177	2.22256	0.40646	5.46808	4.54926e-08	5.28102e-07
POLR1A	100.047	1.19717	0.218961	5.46749	4.56447e-08	5.2931e-07
RP11.147L13.2	15.8573	-2.29211	0.419339	-5.46599	4.6033e-08	5.33533e-07
TBC1D19	46.6462	2.11448	0.387053	5.46302	4.68093e-08	5.42244e-07
KIAA1432	268.771	-1.31055	0.239905	-5.46279	4.6871e-08	5.42674e-07
EFHC2	67.8809	3.51556	0.643776	5.46084	4.73876e-08	5.48367e-07
CASC10	22.0892	4.8339	0.885449	5.45926	4.78113e-08	5.5298e-07
MTPN	692.654	-1.03976	0.190522	-5.45746	4.8299e-08	5.58035e-07
LPAR2	162.952	-1.60337	0.293802	-5.45733	4.83354e-08	5.58162e-07
RP11.398A8.1	3.70181	-5.54399	1.01607	-5.45629	4.86184e-08	5.61136e-07
FAHD2B	27.2044	2.56055	0.469351	5.45551	4.88319e-08	5.63305e-07
WDR59	141.89	1.02499	0.187889	5.45527	4.88984e-08	5.63777e-07
TXNIP	13050.6	-1.93725	0.35531	-5.45227	4.97298e-08	5.72763e-07
APITD1	15.8616	1.86796	0.342608	5.45216	4.97623e-08	5.72839e-07
TLR6	50.5979	-1.80944	0.331893	-5.45187	4.98435e-08	5.73473e-07
RHPN1	209.781	2.68948	0.493679	5.44784	5.09848e-08	5.85687e-07
AC011515.2	6.35395	-5.13375	0.942332	-5.44792	5.09626e-08	5.85687e-07
ITM2C	1749.54	2.47768	0.454934	5.44624	5.14456e-08	5.90672e-07
CCNG1	987.509	1.6721	0.307036	5.44593	5.15357e-08	5.91216e-07
G6PD	736.214	-1.10921	0.203678	-5.44589	5.15466e-08	5.91216e-07
AC015969.3	19.6831	-2.83202	0.52011	-5.44503	5.17957e-08	5.93764e-07
ARHGAP27	627.14	-1.56586	0.287665	-5.44336	5.2286e-08	5.99073e-07
C14orf80	49.2734	-1.57439	0.289264	-5.44272	5.24729e-08	6.00902e-07
CDKN2AIP	346.006	1.34274	0.246791	5.4408	5.30431e-08	6.07116e-07
MLLT11	182.269	1.72745	0.317541	5.4401	5.32519e-08	6.0919e-07
AP001171.1	38.0273	4.32585	0.795224	5.43979	5.33422e-08	6.09906e-07
ZNF549	67.567	1.7394	0.319787	5.43923	5.35099e-08	6.11506e-07
ADORA2A	8.72722	-3.28506	0.604272	-5.43639	5.43703e-08	6.21016e-07
RP1.257A7.4	58.3764	-1.92377	0.353902	-5.43587	5.45286e-08	6.22502e-07
EXD2	93.9755	2.19214	0.403422	5.43387	5.51435e-08	6.29196e-07
IFT46	68.6259	1.76982	0.325728	5.43344	5.52781e-08	6.30108e-07
ACP6	53.4497	2.30203	0.423756	5.43244	5.55875e-08	6.3295e-07
METTL15	49.167	1.29107	0.237742	5.43055	5.61805e-08	6.39042e-07
FCGR1C	7.28575	-4.57008	0.841756	-5.42922	5.66021e-08	6.43506e-07
VMP1	2406.43	-1.31764	0.24276	-5.42775	5.70704e-08	6.48495e-07
LRRC23	53.5279	1.26943	0.233956	5.42594	5.76495e-08	6.54738e-07
IFT122	185.233	1.39078	0.256329	5.42575	5.77118e-08	6.55108e-07
ZNF790	29.4682	1.80032	0.33205	5.42184	5.89875e-08	6.69244e-07
NECAP2	673.883	-1.01606	0.187458	-5.4202	5.95314e-08	6.75067e-07
C14orf182	29.6505	-2.72147	0.502213	-5.41897	5.99446e-08	6.79402e-07
TTC3	1425.98	1.31287	0.242398	5.41617	6.08908e-08	6.89418e-07
CLIP4	226.044	-1.69215	0.312464	-5.41552	6.11113e-08	6.91559e-07
GUK1	987.389	-1.02925	0.190082	-5.41477	6.13683e-08	6.94111e-07
NT5M	11.7998	3.00297	0.554658	5.41409	6.16011e-08	6.96387e-07
CCL7	11.9032	-7.60708	1.40551	-5.41232	6.22142e-08	7.02957e-07
CAST	1047.36	-1.63191	0.301558	-5.41161	6.24622e-08	7.05397e-07
SLC27A5	21.8713	1.76044	0.32548	5.40874	6.34688e-08	7.16031e-07
CXCL10	83.2839	-4.63714	0.85755	-5.40743	6.39369e-08	7.20942e-07
FAM179B	276.893	1.06982	0.197872	5.40659	6.42354e-08	7.23938e-07
PSMG1	318.651	1.39419	0.257883	5.40631	6.43359e-08	7.24699e-07
ZNF671	127.583	1.50082	0.277649	5.40547	6.46377e-08	7.27728e-07
DCAKD	119.11	1.2224	0.226299	5.40169	6.60149e-08	7.42853e-07
ZNF773	111.762	1.47699	0.27347	5.4009	6.63084e-08	7.45775e-07
CFD	2516.95	-3.19512	0.591707	-5.39983	6.67055e-08	7.49859e-07
KLF11	237.809	-2.9505	0.546435	-5.39954	6.68102e-08	7.50652e-07
ZNF146	530.684	1.57403	0.291567	5.39853	6.71879e-08	7.54512e-07
RHOU	42.0657	-3.74726	0.694177	-5.39813	6.73402e-08	7.55837e-07
SQSTM1	1727.87	-1.66762	0.308949	-5.39771	6.74986e-08	7.57228e-07
ABI2	157.553	2.04585	0.379235	5.39467	6.86513e-08	7.69768e-07
ARNTL	167.108	-2.1432	0.397331	-5.39399	6.89099e-08	7.71881e-07
PTK2B	1289.64	-1.10124	0.204237	-5.39197	6.96896e-08	7.79822e-07
NADK2	87.9471	1.32604	0.245945	5.39161	6.98282e-08	7.80977e-07
NASP	776.976	1.04676	0.194191	5.39037	7.03122e-08	7.85991e-07
FAS	240.433	-1.58767	0.294646	-5.38839	7.10922e-08	7.94307e-07
RNF125	374.695	1.59686	0.296418	5.38718	7.15699e-08	7.9924e-07
CTD.2561J22.5	27.6971	3.76168	0.698511	5.38529	7.23297e-08	8.07315e-07
ADRBK2	251.759	-1.48218	0.275247	-5.38492	7.24762e-08	8.08541e-07
TFB1M	65.8937	1.36996	0.254446	5.3841	7.2809e-08	8.11843e-07
AP3M2	100.371	1.55294	0.288505	5.38271	7.3374e-08	8.17728e-07
TRIM24	312.64	1.34992	0.250927	5.37971	7.46055e-08	8.30613e-07
ZNF496	199.925	1.33989	0.249077	5.37942	7.47255e-08	8.31529e-07
HEMK1	162.219	1.01463	0.188688	5.37728	7.56179e-08	8.41035e-07
RNF144A	136.248	2.31948	0.431397	5.37667	7.58775e-08	8.43496e-07
CRY2	359.867	-1.31389	0.244454	-5.3748	7.66696e-08	8.51014e-07
C12orf61	15.076	-2.27478	0.423231	-5.3748	7.66689e-08	8.51014e-07
SASH3	1462.07	-1.26479	0.235442	-5.37199	7.78711e-08	8.63045e-07
MSRB3	569.348	2.28433	0.425332	5.37069	7.84355e-08	8.68863e-07
AIRN	8.70735	-4.05707	0.755498	-5.37006	7.87102e-08	8.71468e-07
NFKB1	164.943	-1.36181	0.253768	-5.36635	8.03469e-08	8.88697e-07
RHOH	550.687	2.75821	0.514158	5.36452	8.11648e-08	8.97292e-07
PHF7	131.13	1.38465	0.258126	5.36424	8.12914e-08	8.98242e-07
UBA5	296.453	1.03845	0.193628	5.36312	8.17946e-08	9.02473e-07
ACTBP2	12.7561	-1.56813	0.292396	-5.36303	8.18382e-08	9.02473e-07
KANK1	77.7585	2.72878	0.508801	5.36315	8.17846e-08	9.02473e-07
GPR114	264.126	2.59387	0.483654	5.36308	8.18159e-08	9.02473e-07
RP11.779O18.1	4.45918	-3.88079	0.723788	-5.36178	8.24074e-08	9.08295e-07
BMI1	442.387	2.1088	0.393353	5.36108	8.27276e-08	9.11368e-07
FAM198B	312.048	-3.80024	0.709233	-5.35824	8.40367e-08	9.25328e-07
SNORD78	7.60331	1.72423	0.321882	5.3567	8.47543e-08	9.32764e-07
PKN1	648.807	-1.01468	0.189459	-5.35567	8.5242e-08	9.36727e-07
KCNQ1	21.9526	-3.46567	0.647119	-5.35554	8.53007e-08	9.36905e-07
SELPLG	2027.5	-2.16436	0.404223	-5.35437	8.58566e-08	9.4254e-07
CUL7	109.12	1.03908	0.194084	5.35377	8.61396e-08	9.45176e-07
TMEM154	481.726	-1.98695	0.37134	-5.35075	8.75891e-08	9.60124e-07
LINC00346	5.60827	-5.65483	1.05682	-5.35078	8.75762e-08	9.60124e-07
RP5.1041C10.3	6.4089	-2.88942	0.54021	-5.34869	8.85924e-08	9.70639e-07
MRPS24	23.8732	-2.05695	0.38462	-5.34801	8.89271e-08	9.73823e-07
RENBP	44.3177	-1.65816	0.310069	-5.34771	8.90733e-08	9.74938e-07
COL4A3BP	622.005	-1.10546	0.206721	-5.34762	8.91206e-08	9.74973e-07
RP11.566K19.6	7.73156	4.62213	0.864407	5.34717	8.93397e-08	9.76884e-07
MRPS31	152.158	1.28149	0.239694	5.34638	8.97328e-08	9.80696e-07
TULP2	12.8509	-2.414	0.451544	-5.34609	8.98723e-08	9.81734e-07
TARSL2	136.015	1.69373	0.316825	5.34596	8.99405e-08	9.81991e-07
OR2W3	20.1751	3.1124	0.582368	5.34439	9.07242e-08	9.90057e-07
ACTR3C	15.9483	1.64372	0.307589	5.34389	9.0971e-08	9.92259e-07
ZKSCAN4	56.6991	2.22944	0.417233	5.34339	9.12252e-08	9.9454e-07
ALS2	172.847	1.5378	0.287841	5.34251	9.16666e-08	9.98858e-07
BLMH	245.568	1.2108	0.226662	5.34189	9.19806e-08	1.00178e-06
GRB10	65.459	2.45157	0.459069	5.34031	9.27854e-08	1.01005e-06
CAD	143.453	1.87461	0.351061	5.33984	9.30285e-08	1.0122e-06
C20orf203	12.2099	3.25437	0.609728	5.33741	9.4284e-08	1.02535e-06
KDM5B	829.821	1.57083	0.294371	5.33622	9.49019e-08	1.03156e-06
EXOSC8	430.19	1.07319	0.201132	5.33577	9.5138e-08	1.03362e-06
VPS18	296.986	-1.15145	0.215815	-5.33536	9.5353e-08	1.03544e-06
GUSBP9	9.87584	2.03306	0.381145	5.33409	9.60249e-08	1.04222e-06
ITPRIP	744.438	-1.8924	0.354834	-5.33319	9.65034e-08	1.0469e-06
IL12RB2	88.1728	7.19832	1.34975	5.33309	9.65542e-08	1.04694e-06
DDX31	62.2414	1.29715	0.243256	5.33245	9.68967e-08	1.05013e-06
ZNFX1	839.452	-1.45212	0.272332	-5.33218	9.70414e-08	1.05119e-06
HTR7	57.8322	-4.41055	0.827422	-5.33048	9.79562e-08	1.06057e-06
IRAK1BP1	12.4692	2.50601	0.470142	5.33033	9.80324e-08	1.06088e-06
TRIM36	15.1868	-3.70656	0.695739	-5.32752	9.95632e-08	1.07692e-06
DDX10	231.085	1.43747	0.269828	5.32736	9.96505e-08	1.07733e-06
PPM1M	186.282	-2.41468	0.45329	-5.32701	9.98419e-08	1.07887e-06
DEPDC4	8.1223	3.10342	0.583062	5.32262	1.02284e-07	1.10401e-06
ZNF202	89.4346	1.84753	0.347185	5.32146	1.02939e-07	1.11016e-06
RP11.474N24.2	2.54684	-5.12779	0.963917	-5.31974	1.03914e-07	1.11958e-06
ATP1A3	5.80893	3.74302	0.703769	5.31854	1.04604e-07	1.12646e-06
IRGM	28.2817	3.46903	0.652393	5.31739	1.05264e-07	1.13259e-06
ELN	22.6276	5.16055	0.970508	5.31737	1.05276e-07	1.13259e-06
DDC8	14.9661	-2.67929	0.503936	-5.31673	1.05647e-07	1.13603e-06
ZNF141	84.9533	1.25022	0.235165	5.31635	1.0587e-07	1.13788e-06
SORL1	1485.39	1.62582	0.305842	5.31587	1.06147e-07	1.14029e-06
AC105053.4	6.71301	-4.28085	0.805376	-5.31534	1.0646e-07	1.14254e-06
CDK4	317.848	1.26737	0.238446	5.31513	1.06579e-07	1.14326e-06
CSPP1	161.858	1.49421	0.281201	5.31367	1.07441e-07	1.15195e-06
STAG3L2	110.956	1.47418	0.27754	5.3116	1.08666e-07	1.16451e-06
ELOVL6	53.8981	3.56234	0.670782	5.31073	1.09186e-07	1.16952e-06
RRP12	945.086	-1.7687	0.333077	-5.31019	1.09513e-07	1.17245e-06
DYTN	32.451	4.0852	0.769434	5.30935	1.10014e-07	1.17724e-06
CCDC41	149.164	1.20849	0.227629	5.30901	1.10221e-07	1.17831e-06
RP11.356I2.4	134.933	-1.80394	0.339814	-5.30861	1.10466e-07	1.18036e-06
CTC.359D24.3	8.00881	2.48932	0.469026	5.30741	1.11191e-07	1.18753e-06
ZNF608	14.0101	4.02217	0.757899	5.307	1.11445e-07	1.18923e-06
TTI1	173.143	1.31783	0.248321	5.30698	1.11458e-07	1.18923e-06
DES	19.585	-7.40766	1.39599	-5.30638	1.11825e-07	1.19256e-06
GOLGA8B	120.388	2.882	0.543255	5.30505	1.12639e-07	1.20067e-06
GNL3	670.981	1.0982	0.207171	5.30092	1.1522e-07	1.22759e-06
RETN	106.217	-5.7699	1.0891	-5.29785	1.17174e-07	1.2478e-06
TBC1D9	130.902	-5.06212	0.955561	-5.29753	1.17377e-07	1.24935e-06
RP11.875O11.2	3.11911	-4.10727	0.775336	-5.29741	1.17457e-07	1.24961e-06
SQRDL	296.733	-1.63364	0.308476	-5.29586	1.18461e-07	1.25846e-06
ZNF667	69.9722	4.07177	0.768857	5.29587	1.18452e-07	1.25846e-06
NPEPL1	67.2106	-1.26661	0.239164	-5.29599	1.18376e-07	1.25846e-06
BCL7A	152.695	2.41383	0.455903	5.29461	1.19272e-07	1.26647e-06
RP11.1070N10.3	1.96876	-3.95089	0.74672	-5.29098	1.2166e-07	1.2912e-06
TMEM106B	186.49	1.07109	0.202506	5.28914	1.2289e-07	1.30363e-06
GUSBP5	12.1959	3.96269	0.749326	5.28834	1.23432e-07	1.30875e-06
ZNF366	8.68381	-5.4274	1.02634	-5.2881	1.23596e-07	1.30922e-06
LIMA1	74.177	2.24375	0.424298	5.28816	1.23553e-07	1.30922e-06
GADD45B	2153.16	-2.34738	0.443959	-5.28737	1.24087e-07	1.3138e-06
KPNA5	112.751	1.16198	0.219815	5.28618	1.24895e-07	1.32172e-06
FN1	61.5053	-3.33794	0.631557	-5.28526	1.2553e-07	1.32629e-06
CTA.331P3.1	26.6373	2.54601	0.481718	5.28527	1.25523e-07	1.32629e-06
CTC.260E6.6	13.6353	2.11144	0.3995	5.2852	1.25568e-07	1.32629e-06
TNFRSF14	423.758	-2.05924	0.389722	-5.28387	1.26484e-07	1.33532e-06
RARG	72.8537	-2.27663	0.430896	-5.28348	1.26754e-07	1.33754e-06
CD200	243.881	4.38266	0.82968	5.28235	1.27535e-07	1.34448e-06
IGLL1	176.206	4.76787	0.902592	5.28241	1.27492e-07	1.34448e-06
CBY1	45.6421	1.68046	0.318185	5.28139	1.28206e-07	1.35091e-06
NAP1L4P1	23.1838	-2.25273	0.426551	-5.28126	1.28296e-07	1.35121e-06
MDM2	572.434	-1.28887	0.244152	-5.27896	1.29917e-07	1.36764e-06
MANBA	638.901	-1.07463	0.203577	-5.27875	1.30067e-07	1.36856e-06
SLC8A1	154.364	-4.248	0.805092	-5.27642	1.31733e-07	1.38543e-06
AC068580.5	4.92346	-4.78026	0.906128	-5.27548	1.32412e-07	1.3919e-06
CTPS2	123.648	1.76779	0.335247	5.27309	1.34145e-07	1.40945e-06
RP11.418J17.1	35.8604	1.18259	0.224371	5.27069	1.3591e-07	1.42731e-06
RPGRIP1L	17.4421	3.37501	0.640397	5.27018	1.36287e-07	1.43059e-06
ZNF544	95.0937	1.98339	0.376393	5.26946	1.36824e-07	1.43555e-06
TTC26	31.4648	2.34865	0.445727	5.26925	1.36979e-07	1.43648e-06
IKBKG	32.1308	-1.26545	0.240242	-5.26739	1.38379e-07	1.44979e-06
KLF10	4392.26	-1.88271	0.35751	-5.26616	1.39303e-07	1.45809e-06
EGR2	706.032	-3.13093	0.594698	-5.26474	1.40392e-07	1.46808e-06
SLC16A3	560.081	-2.39975	0.455992	-5.26271	1.4195e-07	1.48297e-06
GART	497.857	1.2733	0.241957	5.26251	1.42101e-07	1.48385e-06
MTFP1	16.5544	-2.67917	0.509154	-5.26199	1.42504e-07	1.48735e-06
BLZF1	241.786	1.13415	0.215589	5.26072	1.43495e-07	1.49698e-06
MKI67IPP3	5.04834	5.06329	0.962534	5.26037	1.43763e-07	1.49907e-06
LPIN1	519.245	1.70781	0.324713	5.25944	1.44494e-07	1.50526e-06
CRIP1	118.468	-1.7832	0.339047	-5.25945	1.44488e-07	1.50526e-06
CEP68	329.246	1.44195	0.274204	5.25866	1.45106e-07	1.51092e-06
ORC5	113.895	1.46189	0.278024	5.25815	1.45514e-07	1.51446e-06
CALHM2	198.54	-2.16495	0.411808	-5.25717	1.46286e-07	1.52177e-06
ARHGAP26.IT1	7.56349	-3.00215	0.571487	-5.25323	1.49455e-07	1.55255e-06
TRAF2	111.562	1.11474	0.212271	5.25152	1.5085e-07	1.5663e-06
MTHFD2L	221.481	1.08253	0.206242	5.24886	1.53046e-07	1.5876e-06
BDH1	93.396	1.71349	0.32646	5.24869	1.53182e-07	1.58826e-06
RP11.156K13.3	3.2836	-5.2055	0.992353	-5.24562	1.55761e-07	1.61381e-06
ZNF761	110.149	1.48637	0.283357	5.24558	1.55792e-07	1.61381e-06
LYN	813.057	-1.71075	0.326139	-5.24547	1.55882e-07	1.61398e-06
TMEM182	30.1447	2.55066	0.486589	5.24192	1.58914e-07	1.6446e-06
CASP2	819.742	1.12201	0.214181	5.23861	1.61791e-07	1.67113e-06
RP11.809O17.1	25.3498	-1.59461	0.3044	-5.23853	1.61857e-07	1.67113e-06
COG6	151.33	1.30474	0.24908	5.23822	1.6213e-07	1.67317e-06
KCNQ5	67.5988	3.40087	0.649451	5.23654	1.63617e-07	1.68693e-06
BX649553.2	2.39674	-3.61801	0.690912	-5.23657	1.63584e-07	1.68693e-06
TBL1X	101.552	-1.8942	0.361857	-5.23466	1.65288e-07	1.70257e-06
CTC.523E23.4	3.39097	5.07747	0.970184	5.23351	1.66325e-07	1.71244e-06
LRRC34	31.8691	2.34757	0.448576	5.23339	1.66433e-07	1.71276e-06
RP11.102N12.3	18.2407	-3.82316	0.730804	-5.23144	1.68191e-07	1.73004e-06
CLUAP1	62.0473	2.00675	0.383612	5.2312	1.68415e-07	1.73154e-06
BCS1L	202.258	1.41787	0.271048	5.23106	1.68538e-07	1.732e-06
ZNF175	37.7945	2.24034	0.428291	5.23088	1.68704e-07	1.7329e-06
BMP1	118.322	1.46727	0.280543	5.2301	1.69419e-07	1.73943e-06
[truncated: 4,310 more rows]

## Sheet: Supplemental Table 3b
Supplemental Table 3b. Differential gene expression in Mono-AML LSC-like vs Mature
SYMBOL	baseMean	log2FoldChange	lfcSE	stat	pvalue	padj
FOLR3	61.9814	-22.6222	1.18171	-19.1436	1.09378e-81	2.34278e-77
PLA2G7	68.8193	-23.5573	1.39483	-16.889	5.41697e-64	5.80131e-60
CEACAM3	29.6594	-20.3944	1.31228	-15.5412	1.82413e-54	1.30237e-50
C5AR1	1698.5	-9.54428	0.65244	-14.6286	1.84603e-48	9.88503e-45
PILRA	838.769	-6.72782	0.460449	-14.6115	2.37403e-48	1.01699e-44
IFI30	516.743	-7.48036	0.52036	-14.3753	7.39019e-47	2.63818e-43
SLC11A1	1321.6	-8.08809	0.570973	-14.1654	1.49933e-45	4.58774e-42
PSAP	30707.1	-4.21182	0.298017	-14.1328	2.38426e-45	6.38356e-42
CD14	2249.53	-11.7044	0.873053	-13.4063	5.55248e-41	1.32143e-37
MAFB	1802.27	-10.7221	0.835902	-12.8269	1.15857e-37	2.48153e-34
FGR	2671.91	-5.7612	0.453404	-12.7066	5.43767e-37	1.05881e-33
FCN1	8486.16	-10.0899	0.795228	-12.6881	6.88685e-37	1.22925e-33
CTSS	9611.59	-4.97855	0.395064	-12.6019	2.06139e-36	3.39638e-33
RP11.290F20.3	675.226	-9.04484	0.732411	-12.3494	4.90727e-35	7.50778e-32
HK3	770.875	-11.0756	0.908972	-12.1848	3.74529e-34	5.34803e-31
S100A8	8344.08	-9.05142	0.755778	-11.9763	4.7302e-33	6.33226e-30
LGALS3	1833.41	-6.58902	0.551673	-11.9437	7.00411e-33	8.82477e-30
VCAN	3897.03	-10.0634	0.849282	-11.8493	2.17106e-32	2.58344e-29
FGL2	1440.03	-6.66254	0.57017	-11.6852	1.51744e-31	1.71063e-28
CTSB	5566.74	-3.09349	0.265351	-11.6581	2.08644e-31	2.23448e-28
CD300E	1703.79	-11.4941	0.998391	-11.5126	1.13992e-30	1.16266e-27
HMOX1	675.196	-7.48871	0.651352	-11.4972	1.36306e-30	1.32706e-27
ATP6V0D1	1329.95	-2.3785	0.209205	-11.3692	5.95341e-30	5.54418e-27
S100A9	12484.9	-8.45939	0.745013	-11.3547	7.02972e-30	6.27373e-27
S100A12	719.918	-9.36344	0.848743	-11.0321	2.67477e-28	2.29163e-25
CHRDL1	22.1541	23.5965	2.1469	10.991	4.22351e-28	3.47936e-25
LILRA6	337.859	-7.6636	0.702768	-10.9049	1.09255e-27	8.66715e-25
SCIMP	404.446	-7.91982	0.738932	-10.7179	8.38529e-27	6.41445e-24
COBL	16.9873	23.1981	2.16904	10.6951	1.07333e-26	7.92744e-24
C1QA	507.789	-11.9411	1.11876	-10.6735	1.35403e-26	9.66732e-24
PTPRCAP	317.743	4.85353	0.455065	10.6656	1.47505e-26	1.01917e-23
TYMP	1361.29	-6.2073	0.587677	-10.5624	4.44976e-26	2.97842e-23
APOBEC3A	1081.26	-12.3542	1.17041	-10.5554	4.79494e-26	3.11221e-23
TREX1	390.331	-2.23843	0.212255	-10.546	5.30341e-26	3.34099e-23
PLBD1	1337.6	-10.6106	1.02147	-10.3876	2.82268e-25	1.7274e-22
CCR1	603.338	-7.16834	0.69506	-10.3133	6.13789e-25	3.65188e-22
KIAA0125	486.618	6.70118	0.655029	10.2304	1.44987e-24	8.39316e-22
ZNF385A	228.06	-4.71305	0.466608	-10.1007	5.48737e-24	3.093e-21
IL1RN	488.547	-7.0855	0.702038	-10.0928	5.94748e-24	3.26639e-21
FKBP15	510.881	-2.28816	0.227005	-10.0798	6.78554e-24	3.63349e-21
WARS	4041.71	-3.59496	0.360199	-9.98048	1.85567e-23	9.69432e-21
TBC1D8	270.785	-4.18451	0.419624	-9.97204	2.02044e-23	1.03038e-20
SLC43A2	416.762	-3.78867	0.38033	-9.96153	2.24579e-23	1.11867e-20
G0S2	1315.15	-10.2088	1.02792	-9.93153	3.03564e-23	1.47774e-20
FPR1	883.443	-9.10476	0.917834	-9.91984	3.41317e-23	1.62459e-20
ITPK1	378.883	-2.4971	0.253036	-9.86854	5.69877e-23	2.65352e-20
LILRA5	781.827	-8.83548	0.897203	-9.8478	7.00603e-23	3.19281e-20
LRRC25	1377.49	-5.99536	0.610035	-9.8279	8.53817e-23	3.80998e-20
C5AR2	40.7272	-9.14144	0.932005	-9.80836	1.03639e-22	4.53031e-20
C19orf77	254.582	6.05678	0.618747	9.78878	1.25801e-22	5.38905e-20
GPBAR1	259.101	-7.04711	0.721728	-9.76422	1.60342e-22	6.73406e-20
UBXN11	1040.51	-2.93436	0.301904	-9.71951	2.48983e-22	1.02557e-19
BEND5	41.0751	4.42154	0.456691	9.68167	3.6077e-22	1.45799e-19
TCIRG1	1705.6	-2.9809	0.308615	-9.65897	4.5037e-22	1.78639e-19
SECTM1	181.786	-7.96308	0.828478	-9.6117	7.13611e-22	2.77906e-19
MAP2K1	383.179	-2.56512	0.267316	-9.59583	8.32419e-22	3.18386e-19
FGD5	18.8998	23.1065	2.41137	9.58232	9.4893e-22	3.50433e-19
NMU	6.51939	22.2372	2.32023	9.58402	9.33361e-22	3.50433e-19
ZNF22	303.855	2.79286	0.291558	9.5791	9.78928e-22	3.55384e-19
PLAUR	2949.44	-4.51619	0.474006	-9.52772	1.60769e-21	5.73917e-19
LINC00877	286.707	-4.95598	0.526072	-9.42072	4.47989e-21	1.57303e-18
LILRA3	536.781	-9.21724	0.990863	-9.30224	1.37519e-20	4.75085e-18
MYD88	2801.63	-2.63371	0.28419	-9.26741	1.90714e-20	6.38267e-18
ERG	350.804	4.36602	0.471056	9.26856	1.88669e-20	6.38267e-18
FTLP3	75.3203	-2.60919	0.282592	-9.23307	2.62982e-20	8.66588e-18
CDA	248.221	-7.3029	0.792454	-9.21556	3.09664e-20	9.89954e-18
STXBP2	576.62	-2.40875	0.261366	-9.21601	3.08361e-20	9.89954e-18
CARD16	515.1	-2.8708	0.312432	-9.18856	3.98146e-20	1.2541e-17
ARAP1	993.273	-2.37576	0.259691	-9.1484	5.77844e-20	1.79375e-17
CDK6	2476.51	2.86237	0.314829	9.0918	9.74126e-20	2.98069e-17
SNHG10	70.2522	2.88552	0.317525	9.08754	1.01307e-19	3.0562e-17
IGHG1	501.132	24.1506	2.66007	9.07893	1.09646e-19	3.26182e-17
LILRB3	94.502	-4.84476	0.535471	-9.04767	1.46051e-19	4.2853e-17
MARCO	139.203	-11.2691	1.24885	-9.02356	1.82066e-19	5.26984e-17
ASNSD1	330.348	1.07615	0.119719	8.98891	2.4969e-19	7.08737e-17
SHKBP1	1324.52	-1.82068	0.202565	-8.98813	2.51478e-19	7.08737e-17
FTL	43732.2	-2.69207	0.299919	-8.976	2.80779e-19	7.8104e-17
SLC6A12	17.792	-8.34292	0.931493	-8.9565	3.35139e-19	9.20301e-17
OLR1	92.4011	-7.10809	0.794049	-8.9517	3.5006e-19	9.49106e-17
LRP1	465.331	-7.38247	0.826307	-8.93429	4.0979e-19	1.09716e-16
GPCPD1	1397.23	-2.43886	0.273079	-8.93095	4.2237e-19	1.11688e-16
PRKCQ.AS1	98.2961	4.61482	0.518511	8.90015	5.57734e-19	1.45684e-16
IGHV4.34	11.8097	21.1897	2.38371	8.88938	6.1453e-19	1.58586e-16
SPNS2	33.9164	5.32897	0.600398	8.87572	6.94847e-19	1.77178e-16
SPI1	1129.3	-3.04607	0.343302	-8.87286	7.12925e-19	1.7756e-16
CPXM1	521.897	3.88273	0.437592	8.87293	7.12432e-19	1.7756e-16
ADAP2	235.919	-5.90047	0.668015	-8.83284	1.02049e-18	2.51241e-16
MS4A7	1641.9	-5.11977	0.580202	-8.82412	1.10326e-18	2.68532e-16
CCNB1IP1	161.055	2.32668	0.265124	8.77584	1.69626e-18	4.08227e-16
SIGLEC7	96.2783	-7.55157	0.861197	-8.76869	1.80749e-18	4.30163e-16
GUCY1A3	694.522	4.77914	0.545387	8.76284	1.90391e-18	4.48129e-16
C1QC	145.269	-11.6444	1.32925	-8.76014	1.95013e-18	4.54021e-16
NINJ1	1580.21	-3.76375	0.429872	-8.75551	2.0319e-18	4.6628e-16
ITM2A	894.033	5.19706	0.59363	8.75471	2.04633e-18	4.6628e-16
LRRK2	258.591	-7.51148	0.858948	-8.74498	2.23061e-18	5.02919e-16
RP11.38J22.6	183.967	6.37189	0.729302	8.73697	2.3944e-18	5.28719e-16
ISYNA1	255.261	3.99327	0.457002	8.73795	2.37368e-18	5.28719e-16
MCOLN1	361.351	-3.32024	0.380716	-8.72103	2.75672e-18	6.02513e-16
FCER1G	4929.09	-5.20719	0.599256	-8.68942	3.64298e-18	7.88171e-16
MEFV	101.522	-7.29541	0.840978	-8.67491	4.13862e-18	8.86451e-16
MTMR11	123.055	-5.32308	0.615064	-8.65451	4.95019e-18	1.04978e-15
C1orf186	487.558	6.70422	0.77667	8.63201	6.02847e-18	1.26592e-15
TFDP2	607.752	2.96939	0.344313	8.62411	6.45939e-18	1.34324e-15
TSPYL4	577.389	1.93142	0.224375	8.60803	7.43247e-18	1.52425e-15
RP11.44F14.1	28.3259	-9.31508	1.08222	-8.60742	7.47216e-18	1.52425e-15
SIRPD	9.92927	-7.00068	0.813967	-8.60069	7.92389e-18	1.60115e-15
UNG	264.005	3.51772	0.409459	8.59116	8.60993e-18	1.72352e-15
CTSD	2468.05	-2.96914	0.345752	-8.58747	8.89043e-18	1.76319e-15
NFAM1	590.682	-5.83663	0.680107	-8.58194	9.32893e-18	1.83318e-15
EMR3	95.5268	-8.67022	1.01349	-8.5548	1.18072e-17	2.29908e-15
ASAH1	3819.56	-2.62321	0.306892	-8.54765	1.25622e-17	2.4024e-15
MLX	405.22	-1.366	0.159808	-8.54773	1.25529e-17	2.4024e-15
POR	337.651	-1.90341	0.223229	-8.52671	1.50566e-17	2.85395e-15
MBD2	91.1652	-2.22143	0.261809	-8.48492	2.15865e-17	4.05579e-15
IDH3G	548.601	-1.02894	0.121425	-8.47387	2.37366e-17	4.42099e-15
IQCB1	343.725	1.64866	0.194687	8.46825	2.49118e-17	4.59987e-15
GRB2	1781.2	-1.56815	0.185273	-8.46401	2.58346e-17	4.72951e-15
NAMPT	2506.37	-3.71036	0.438573	-8.46008	2.67205e-17	4.85023e-15
ANKRD36B	229.663	2.46022	0.292349	8.41537	3.91665e-17	7.04965e-15
TNFRSF1B	3246.91	-4.34669	0.517088	-8.40609	4.23917e-17	7.38201e-15
TESPA1	309.784	4.77937	0.568392	8.40858	4.15e-17	7.38201e-15
AHSP	56.0482	25.3233	3.01225	8.40678	4.21438e-17	7.38201e-15
SIGLEC16	24.5161	-8.55096	1.01713	-8.40698	4.20704e-17	7.38201e-15
TMEM170B	103.174	-3.55707	0.424217	-8.38502	5.07162e-17	8.7604e-15
AL122127.25	53.5249	6.99432	0.835467	8.37174	5.67716e-17	9.65071e-15
SNN	644.643	-3.3088	0.395211	-8.37224	5.65348e-17	9.65071e-15
ARRB2	1302.98	-2.83529	0.338958	-8.36471	6.02639e-17	1.01637e-14
MSI2	407.328	3.55559	0.425797	8.35043	6.80143e-17	1.13812e-14
AGBL5	135.585	1.96925	0.236238	8.33588	7.69241e-17	1.27724e-14
LINC00938	374.411	1.76915	0.212834	8.31236	9.38179e-17	1.54576e-14
NCF2	1833.04	-4.98809	0.600885	-8.30124	1.03027e-16	1.68453e-14
NADK	577.349	-2.8014	0.337624	-8.29739	1.06424e-16	1.72688e-14
CTD.2267D19.2	65.1586	-2.72817	0.328914	-8.29448	1.09057e-16	1.75631e-14
LILRB2	1225.23	-5.42933	0.654938	-8.28985	1.13392e-16	1.81249e-14
GPR35	173.187	-4.35344	0.525341	-8.28689	1.16248e-16	1.84439e-14
ESRRA	73.0722	-2.10501	0.254648	-8.26634	1.38134e-16	2.1755e-14
ANKRD36C	483.641	2.28115	0.276171	8.2599	1.45799e-16	2.27946e-14
RNH1	1808.88	-2.13332	0.258619	-8.2489	1.59858e-16	2.47894e-14
TNFAIP2	651.581	-3.77081	0.45717	-8.24814	1.60872e-16	2.47894e-14
STRBP	280.067	3.41249	0.41449	8.233	1.82584e-16	2.7934e-14
NLRC3	121.739	4.31095	0.523953	8.22773	1.9079e-16	2.89825e-14
CD163	501.735	-9.28547	1.12907	-8.22401	1.96816e-16	2.96873e-14
PKIG	168.039	3.46988	0.42237	8.21527	2.11693e-16	3.1708e-14
MGAT1	1983.92	-2.42067	0.295044	-8.20445	2.3165e-16	3.44563e-14
RN7SL368P	60.5373	-4.64352	0.567452	-8.1831	2.76643e-16	4.08649e-14
ASGR2	161.231	-6.88112	0.841553	-8.1767	2.91735e-16	4.27992e-14
CD300C	462.447	-4.91103	0.60104	-8.1709	3.06109e-16	4.46024e-14
PICALM	514.611	-1.62813	0.199628	-8.1558	3.46883e-16	5.02019e-14
NCF1	432.84	-6.19834	0.76473	-8.10526	5.26342e-16	7.56626e-14
DRAM2	595.133	-1.33642	0.164952	-8.10187	5.41199e-16	7.58914e-14
RELT	498.041	-2.93091	0.361712	-8.10288	5.36711e-16	7.58914e-14
CASP5	18.1623	-8.14379	1.0052	-8.10167	5.42106e-16	7.58914e-14
NOL11	447.907	1.81135	0.223512	8.10401	5.31784e-16	7.58914e-14
LFNG	45.9422	-3.93741	0.486303	-8.09661	5.65119e-16	7.85992e-14
GRINA	785.977	-2.67447	0.330673	-8.08796	6.0674e-16	8.38437e-14
CST3	5828.07	-4.66764	0.577471	-8.0829	6.32462e-16	8.68378e-14
CTD.2006K23.1	60.2773	-6.53378	0.809237	-8.074	6.80295e-16	9.28104e-14
RP3.395M20.12	20.2635	-4.75511	0.589029	-8.0728	6.87046e-16	9.31383e-14
SGK1	3615.27	-4.96505	0.615164	-8.07111	6.96638e-16	9.38445e-14
AOAH	1607.63	-4.56248	0.565681	-8.06547	7.29569e-16	9.76665e-14
ZEB2.AS1	62.7417	-3.58499	0.445091	-8.0545	7.98075e-16	1.06014e-13
CTB.114C7.4	16.748	-8.02161	0.995987	-8.05392	8.01821e-16	1.06014e-13
USP3	816.761	-2.33368	0.289915	-8.04953	8.31159e-16	1.08689e-13
IL10RB.AS1	43.8437	-3.98698	0.495316	-8.04937	8.32205e-16	1.08689e-13
CADM1	26.846	-21.1284	2.62642	-8.04455	8.65626e-16	1.12369e-13
C15orf48	32.9179	-8.34909	1.03821	-8.04183	8.85085e-16	1.14203e-13
RGS2	9470.46	-4.25086	0.528935	-8.03665	9.23276e-16	1.17712e-13
ADAP1	61.8003	-3.68326	0.458295	-8.03688	9.21531e-16	1.17712e-13
C2orf62	25.8499	-5.14776	0.640657	-8.03513	9.34773e-16	1.18473e-13
GLT1D1	46.0099	-9.02549	1.12389	-8.0306	9.69967e-16	1.2221e-13
B4GALT6	45.2351	5.03702	0.628104	8.01942	1.0625e-15	1.33086e-13
PRKCQ	170.23	4.38121	0.546716	8.01367	1.11331e-15	1.3864e-13
FAM212A	88.8992	4.00068	0.500076	8.00013	1.24284e-15	1.53875e-13
IFNGR2	963.204	-2.68955	0.336735	-7.98715	1.38089e-15	1.6922e-13
PLXNB2	1052.7	-2.31634	0.290014	-7.987	1.38258e-15	1.6922e-13
FCGR2C	77.1357	-7.49373	0.938799	-7.98226	1.43678e-15	1.74855e-13
NAAA	930.624	-2.89321	0.362786	-7.97499	1.52387e-15	1.84406e-13
ARHGAP31	131.423	-4.8397	0.607795	-7.96272	1.68298e-15	2.01385e-13
NPC2	1361.47	-2.25945	0.283736	-7.96322	1.67624e-15	2.01385e-13
S100A11	2326.45	-4.8318	0.607218	-7.95727	1.75877e-15	2.09283e-13
CLEC4A	220.327	-5.41316	0.682513	-7.93121	2.17019e-15	2.56814e-13
STX11	1657.62	-3.34656	0.423062	-7.91034	2.56692e-15	3.02093e-13
DIRC2	119.785	-2.44501	0.309366	-7.90329	2.71641e-15	3.17938e-13
RP11.453F18__B.1	66.4156	3.84424	0.487334	7.8883	3.06327e-15	3.56588e-13
SLC31A2	132.299	-3.2714	0.414834	-7.88606	3.11878e-15	3.61087e-13
IL1B	4431.93	-4.55862	0.578399	-7.88146	3.23582e-15	3.72624e-13
BSPRY	126.835	4.45994	0.5662	7.87697	3.35415e-15	3.84185e-13
RARA	252.004	-2.48021	0.315338	-7.86523	3.68406e-15	4.19728e-13
CAPZB	1960.04	-1.15688	0.147399	-7.8486	4.20709e-15	4.76781e-13
UNC119	374.159	-2.64778	0.337448	-7.84648	4.27862e-15	4.82336e-13
PPT2	65.7712	3.44546	0.439796	7.83423	4.71707e-15	5.28978e-13
CR1	85.5997	-6.83513	0.872843	-7.83088	4.84478e-15	5.40471e-13
CFP	2225.71	-4.03866	0.515882	-7.82866	4.93109e-15	5.47248e-13
C1QB	276.851	-11.2228	1.43438	-7.82414	5.11127e-15	5.64321e-13
NPR3	403.852	6.62082	0.847081	7.81604	5.45113e-15	5.98757e-13
KIT	557.01	4.74587	0.607321	7.81444	5.52075e-15	6.03311e-13
SIGLEC14	323.999	-4.62435	0.591855	-7.81332	5.56992e-15	6.05595e-13
TMEM176A	405.473	-8.22409	1.05423	-7.80107	6.1383e-15	6.64021e-13
UBE2D1	835.842	-2.98548	0.382888	-7.79728	6.32538e-15	6.80821e-13
PAICS	647.246	2.34335	0.300587	7.79592	6.39405e-15	6.81731e-13
STARD9	72.4744	4.24098	0.544004	7.79585	6.39749e-15	6.81731e-13
C9orf72	1081.74	-2.69028	0.345983	-7.77575	7.49988e-15	7.95247e-13
LACTB	346.317	-2.60104	0.334982	-7.76472	8.18248e-15	8.63352e-13
AK3	537.681	1.63896	0.211258	7.75812	8.61961e-15	9.05017e-13
MPHOSPH9	353	1.59744	0.206004	7.75442	8.87495e-15	9.2728e-13
RXRA	220.048	-3.94398	0.50887	-7.75047	9.15528e-15	9.51927e-13
CDH23	124.327	-4.76365	0.614681	-7.74979	9.20421e-15	9.52391e-13
SIGLEC9	248.675	-6.12859	0.791007	-7.74783	9.34791e-15	9.6261e-13
NUMB	1099.71	-1.47618	0.190606	-7.74467	9.58322e-15	9.82119e-13
ZEB1.AS1	29.719	6.99239	0.902981	7.74367	9.65839e-15	9.85109e-13
C19orf35	24.6434	-3.62854	0.468886	-7.73863	1.00495e-14	1.02014e-12
AP2A1	354.326	-1.6395	0.212182	-7.72685	1.10243e-14	1.11382e-12
ASS1P1	27.211	3.81756	0.494844	7.71467	1.21294e-14	1.20837e-12
BRI3	88.7088	-3.09271	0.40083	-7.71578	1.20248e-14	1.20837e-12
EMILIN2	204.684	-2.90983	0.37717	-7.71491	1.21071e-14	1.20837e-12
TMEM176B	791.64	-7.85606	1.01926	-7.7076	1.28203e-14	1.27129e-12
APBB3	340.501	-2.12565	0.276805	-7.67921	1.60069e-14	1.57996e-12
SLC17A9	829.161	2.56356	0.333982	7.67577	1.64433e-14	1.61559e-12
USP11	675.774	2.17773	0.283868	7.67161	1.6985e-14	1.6612e-12
LILRP1	8.87467	-7.10542	0.92732	-7.66232	1.82609e-14	1.77786e-12
MAST4	181.833	3.96305	0.518001	7.65066	1.99945e-14	1.93784e-12
FAM178B	28.0961	23.8745	3.12402	7.64225	2.13452e-14	2.05943e-12
AP001007.1	31.6936	-5.8166	0.761485	-7.6385	2.19764e-14	2.11082e-12
RP11.61J19.4	57.8632	-3.76337	0.492989	-7.63377	2.27984e-14	2.18e-12
LINC00936	1474.26	-3.14096	0.411547	-7.63207	2.31007e-14	2.19908e-12
CBX5	698.482	2.3735	0.312292	7.60026	2.95541e-14	2.80097e-12
GRN	6612.83	-3.52591	0.464391	-7.59255	3.1368e-14	2.95978e-12
RNPEPL1	100.73	-2.04159	0.269308	-7.58086	3.43272e-14	3.2248e-12
NCF1B	180.771	-6.6029	0.871386	-7.57747	3.52365e-14	3.29577e-12
CYP1B1	342.999	-10.6994	1.41502	-7.56133	3.98964e-14	3.7154e-12
LILRA1	567.863	-5.14098	0.680277	-7.55718	4.11891e-14	3.81918e-12
MS4A14	130.782	-5.79821	0.767691	-7.5528	4.26003e-14	3.933e-12
IGSF6	585.331	-6.16355	0.816595	-7.54787	4.4245e-14	4.06731e-12
RASSF5	1321.03	-1.93467	0.256902	-7.53078	5.04385e-14	4.61684e-12
BCL2A1	1310.07	-5.19798	0.69029	-7.53014	5.06861e-14	4.61977e-12
ZBTB8A	29.713	4.91323	0.65293	7.5249	5.27625e-14	4.76844e-12
RP11.796E2.4	40.052	-4.77158	0.634066	-7.52538	5.2569e-14	4.76844e-12
EMID1	79.6311	5.59014	0.743459	7.51909	5.51571e-14	4.9639e-12
HEXB	1452.43	-1.92471	0.256009	-7.51816	5.55532e-14	4.97863e-12
OAZ1	4337.6	-1.44	0.191729	-7.51062	5.8846e-14	5.25176e-12
RP11.556E13.1	48.3328	5.43675	0.72429	7.50632	6.08111e-14	5.40462e-12
VSIG4	437.769	-8.24628	1.09876	-7.50508	6.13908e-14	5.4336e-12
NAGK	683.499	-2.41981	0.322517	-7.5029	6.24202e-14	5.50197e-12
ZNF574	203.106	2.14415	0.285828	7.50152	6.30815e-14	5.53747e-12
RP11.274B18.2	13.0047	-6.0834	0.811283	-7.4985	6.45513e-14	5.64336e-12
IPO11	202.068	2.01795	0.269242	7.49494	6.63291e-14	5.77522e-12
BCKDHB	162.756	2.36397	0.315481	7.49321	6.72096e-14	5.82818e-12
MAST3	246.995	-2.39161	0.319593	-7.48332	7.24683e-14	6.25887e-12
ADCY7	353.965	-1.99746	0.267178	-7.47615	7.65342e-14	6.58348e-12
SH3BP2	992.474	-2.39121	0.319975	-7.47311	7.83197e-14	6.71012e-12
RNF166	481.762	-1.95429	0.261638	-7.46947	8.05172e-14	6.87091e-12
FBXL5	1864.95	-1.60046	0.214322	-7.46751	8.1725e-14	6.9463e-12
CD55	1876.63	-2.17936	0.291902	-7.46609	8.26153e-14	6.99422e-12
SCO2	136.247	-3.16759	0.424371	-7.46421	8.38028e-14	7.06682e-12
HBEGF	1008.07	-4.04322	0.541968	-7.46026	8.6355e-14	7.24535e-12
GM2A	759.393	-2.38044	0.319098	-7.45989	8.65964e-14	7.24535e-12
IL4I1	100.627	-5.9584	0.79971	-7.4507	9.2843e-14	7.73776e-12
HOPX	445.675	6.29295	0.845138	7.44606	9.61684e-14	7.98384e-12
PWP1	392.033	1.05318	0.141507	7.44257	9.87456e-14	8.13474e-12
ZNF106	1206.27	-1.34861	0.181196	-7.44285	9.85337e-14	8.13474e-12
ZBTB7B	53.288	-3.19101	0.428946	-7.43919	1.01303e-13	8.31348e-12
TMEM120A	129.638	-2.24977	0.302469	-7.43801	1.02211e-13	8.35594e-12
KDM6B	202.318	-2.79716	0.376394	-7.43146	1.07402e-13	8.74691e-12
SMPDL3A	131.768	-9.50014	1.27958	-7.42445	1.13252e-13	9.18844e-12
ATAT1	112.726	1.92717	0.259727	7.41998	1.17139e-13	9.46793e-12
DNAJC9	78.0401	2.39454	0.322992	7.41364	1.22882e-13	9.89478e-12
ZNF439	136.797	2.53474	0.341967	7.41224	1.24184e-13	9.96216e-12
CTSH	1137.07	-4.8227	0.651114	-7.40684	1.2934e-13	1.0337e-11
LINC00528	247.39	-3.22659	0.435785	-7.40409	1.32054e-13	1.05147e-11
PRSS57	783.105	4.84718	0.655753	7.39177	1.44883e-13	1.14935e-11
AP1S2	1314.76	-2.62322	0.354987	-7.38964	1.47226e-13	1.16363e-11
EIF4E2	546.702	-1.08606	0.147043	-7.38604	1.51267e-13	1.19117e-11
VASP	429.163	-2.25339	0.306398	-7.35448	1.91675e-13	1.50384e-11
SIRPB1	593.904	-6.01505	0.818878	-7.34547	2.05031e-13	1.60276e-11
ARHGAP26	193.07	-2.50368	0.340926	-7.34376	2.0768e-13	1.61756e-11
IARS	990.056	1.91408	0.260796	7.33939	2.14572e-13	1.65509e-11
GNS	1986.99	-2.98621	0.406883	-7.33924	2.14816e-13	1.65509e-11
ICAM1	1312.1	-4.00516	0.54567	-7.3399	2.13761e-13	1.65509e-11
LRRC70	82.7997	4.08495	0.556983	7.33406	2.23277e-13	1.71411e-11
RAVER2	54.2827	3.31747	0.452448	7.33228	2.26263e-13	1.71856e-11
TSPAN13	156.377	5.89569	0.804058	7.33243	2.26021e-13	1.71856e-11
NDUFAF6	263.211	1.99666	0.272282	7.33303	2.25001e-13	1.71856e-11
TOM1	840.279	-2.82969	0.386311	-7.3249	2.39082e-13	1.8095e-11
AP001053.11	72.6423	-3.41898	0.466856	-7.3234	2.41771e-13	1.82341e-11
PPFIBP2	113.35	-5.44586	0.743987	-7.31984	2.48266e-13	1.86583e-11
HTR7	57.8322	-8.99928	1.23031	-7.31467	2.58022e-13	1.93237e-11
RASSF2	1305.55	-2.39286	0.327214	-7.31284	2.61548e-13	1.95195e-11
VNN3	86.0486	-7.38673	1.01026	-7.31172	2.63739e-13	1.96146e-11
ZNHIT6	255.696	1.81735	0.248782	7.30497	2.77329e-13	2.05015e-11
AC007879.5	44.6421	-2.91727	0.399361	-7.30485	2.77577e-13	2.05015e-11
PNPLA6	444.535	-1.76597	0.242108	-7.29414	3.00571e-13	2.21235e-11
RPAP2	274.144	1.46741	0.201228	7.29229	3.04735e-13	2.22769e-11
SYNGR2	1521.97	-1.55908	0.213786	-7.29271	3.03775e-13	2.22769e-11
ZRANB3	60.4179	2.23676	0.306779	7.29112	3.07391e-13	2.23946e-11
RP4.576H24.2	7.34009	-7.16639	0.984022	-7.28275	3.27076e-13	2.37479e-11
SNX11	266.988	-1.3464	0.184938	-7.28025	3.33214e-13	2.41119e-11
MTHFR	188.566	-1.9017	0.261314	-7.27747	3.40146e-13	2.44483e-11
SOAT1	709.001	-2.14104	0.294197	-7.27759	3.39828e-13	2.44483e-11
TARBP1	312.057	2.57092	0.353407	7.27467	3.47276e-13	2.48773e-11
C16orf70	304.725	-2.18192	0.300208	-7.26802	3.64794e-13	2.60451e-11
RP11.638I2.10	30.7289	-4.19873	0.578394	-7.25929	3.89118e-13	2.76895e-11
SIDT2	229.035	-3.26277	0.449692	-7.25555	4.00025e-13	2.82777e-11
CLEC4E	167.196	-7.38538	1.01789	-7.25559	3.99929e-13	2.82777e-11
CORO7	156.537	-1.69485	0.233672	-7.25312	4.07288e-13	2.86964e-11
PRPS1	346.516	1.53951	0.212412	7.24775	4.23766e-13	2.97595e-11
BCL11A	851.821	2.44988	0.338048	7.24713	4.25708e-13	2.97982e-11
AC113189.5	30.2723	-4.49549	0.620681	-7.24283	4.39415e-13	3.06574e-11
PLBD2	264.466	-2.13834	0.295336	-7.24036	4.47495e-13	3.11198e-11
SMARCD3	129.857	-4.54549	0.628083	-7.23708	4.5845e-13	3.16759e-11
LINC00482	12.2311	-7.62031	1.05291	-7.23736	4.57507e-13	3.16759e-11
RBFA	97.3868	1.46858	0.20302	7.23368	4.70091e-13	3.23758e-11
ZNF512	185.275	1.95539	0.270528	7.22805	4.89973e-13	3.36369e-11
SLC7A7	827.134	-5.21876	0.722233	-7.22587	4.97912e-13	3.40629e-11
UPF3B	207.773	1.38128	0.191169	7.22547	4.99358e-13	3.40629e-11
LYRM5	249.082	1.38463	0.191692	7.22323	5.07664e-13	3.45196e-11
ANKRD36	316.772	2.24373	0.310928	7.21624	5.34445e-13	3.62256e-11
IER3	365.256	-3.99519	0.555094	-7.19732	6.14069e-13	4.14913e-11
ITGB2	8406.76	-3.05194	0.424207	-7.19446	6.27069e-13	4.22364e-11
SUV39H2	51.433	3.26299	0.453687	7.19215	6.37782e-13	4.28234e-11
IL10RB	409.714	-2.05585	0.28592	-7.19029	6.4654e-13	4.32758e-11
COMMD5	142.931	-1.79594	0.249862	-7.1877	6.58923e-13	4.39672e-11
ZNF507	73.775	3.86952	0.538637	7.18391	6.77454e-13	4.50633e-11
PRLR	53.7953	-7.02986	0.979081	-7.18006	6.96801e-13	4.62068e-11
CD4	1475.29	-3.64968	0.508348	-7.17949	6.99742e-13	4.62586e-11
ACAA1	612.176	-1.35335	0.188874	-7.16537	7.75759e-13	5.11261e-11
F5	91.8997	-8.21651	1.14689	-7.16414	7.82771e-13	5.143e-11
PROM1	804.959	7.50749	1.04863	7.15933	8.10737e-13	5.31045e-11
DNMT3A	220.643	1.81227	0.253374	7.15252	8.51977e-13	5.56356e-11
TRAF5	303.166	3.26356	0.456432	7.15016	8.66755e-13	5.64287e-11
TLR8	97.5363	-7.81696	1.09444	-7.14243	9.16959e-13	5.95162e-11
EVI5	153.086	-2.73909	0.383862	-7.13563	9.63451e-13	6.21571e-11
C9orf47	18.2365	-7.58663	1.06318	-7.13576	9.62573e-13	6.21571e-11
LIPN	36.731	-6.46105	0.906072	-7.13084	9.97578e-13	6.41655e-11
FCGR1B	20.9343	-4.76755	0.668799	-7.12852	1.01454e-12	6.50614e-11
ZSCAN18	125.726	2.64195	0.370752	7.12591	1.03392e-12	6.61062e-11
RP11.1149M10.2	8.98126	-6.58575	0.924941	-7.12018	1.07786e-12	6.87101e-11
BRIX1	310.145	1.53348	0.215479	7.11661	1.10611e-12	7.00938e-11
OR52K3P	46.1158	-9.34476	1.31308	-7.11669	1.1055e-12	7.00938e-11
SAT1	19831.3	-3.03061	0.426046	-7.11335	1.13261e-12	7.15613e-11
CHP1	2053.69	-1.56339	0.219853	-7.11109	1.15128e-12	7.25274e-11
MEGF9	342.026	-3.40971	0.479539	-7.1104	1.15705e-12	7.26771e-11
RABGGTA	280.682	-1.16504	0.163888	-7.10878	1.17074e-12	7.33217e-11
RBP7	38.8926	-9.32502	1.31213	-7.10678	1.18784e-12	7.41758e-11
AC002454.1	42.0654	5.05672	0.711771	7.10442	1.20831e-12	7.52346e-11
C19orf38	289.311	-4.70033	0.661787	-7.10248	1.22535e-12	7.60748e-11
RP11.925D8.5	19.6239	-8.0163	1.12994	-7.09447	1.29846e-12	8.03809e-11
SUPT3H	87.629	2.40747	0.339719	7.08666	1.37387e-12	8.48036e-11
BCR	115.962	2.3155	0.32712	7.07846	1.45767e-12	8.97177e-11
CYP1B1.AS1	6.36796	-6.95406	0.98268	-7.07663	1.47699e-12	9.06466e-11
EHD4	416.946	-3.00999	0.425405	-7.07558	1.48828e-12	9.10785e-11
RRP15	132.667	1.90067	0.268741	7.07247	1.52202e-12	9.28779e-11
RASSF4	770.649	-4.02927	0.569904	-7.07009	1.54831e-12	9.42136e-11
GNAI2	3307.96	-1.93122	0.273562	-7.05951	1.67089e-12	1.01384e-10
PTK7	154.621	3.96572	0.562111	7.05505	1.72545e-12	1.03813e-10
LCP1	16092.9	-1.53749	0.217924	-7.05515	1.72417e-12	1.03813e-10
KIF1C	32.9358	-3.80623	0.539499	-7.05512	1.72449e-12	1.03813e-10
PPARG	22.9358	-8.22817	1.16723	-7.0493	1.7982e-12	1.07887e-10
SLC2A6	296.656	-3.62131	0.515281	-7.02783	2.09769e-12	1.25504e-10
TTYH3	325.067	-2.68348	0.38188	-7.02704	2.10967e-12	1.25519e-10
SLC37A2	138.896	-5.43617	0.77357	-7.02738	2.10446e-12	1.25519e-10
FIP1L1	452.131	1.02857	0.146497	7.02115	2.20047e-12	1.30559e-10
JAZF1	117.56	-3.86564	0.550874	-7.01728	2.26224e-12	1.33853e-10
TNFRSF8	60.4876	-5.83094	0.831208	-7.01501	2.29926e-12	1.35317e-10
VCAN.AS1	4.5374	-6.49622	0.926048	-7.01499	2.29961e-12	1.35317e-10
HDAC2	858.516	1.17012	0.16691	7.01049	2.37491e-12	1.39365e-10
MYCL	48.0381	-5.70828	0.81469	-7.00668	2.44032e-12	1.42812e-10
SIRPA	382.47	-4.12063	0.588558	-7.00124	2.53708e-12	1.4807e-10
SLC46A2	38.4281	-7.97371	1.1392	-6.9994	2.57057e-12	1.49617e-10
CLEC7A	950.379	-6.50598	0.929759	-6.99749	2.60595e-12	1.51265e-10
RPH3A	14.4723	-7.84385	1.12128	-6.99546	2.64386e-12	1.53051e-10
CD34	1617.45	7.04107	1.007	6.99212	2.70755e-12	1.56315e-10
CDC42EP3	1485.08	-3.44841	0.493403	-6.98904	2.76783e-12	1.59366e-10
MLC1	389.941	3.6243	0.51919	6.98067	2.93767e-12	1.68691e-10
KANK1	77.7585	4.63157	0.663717	6.97824	2.98911e-12	1.71186e-10
SLC16A6	36.3981	-8.88518	1.27364	-6.97622	3.03237e-12	1.73201e-10
CHST15	298.047	-7.21194	1.03396	-6.9751	3.05661e-12	1.74121e-10
GABARAP	349.012	-1.66531	0.238849	-6.97222	3.11977e-12	1.77247e-10
SEPT6	1374.72	1.7537	0.251588	6.97054	3.15737e-12	1.78909e-10
HVCN1	198.943	-3.24954	0.466306	-6.96868	3.19923e-12	1.80803e-10
ATP6V0B	1972.86	-1.75655	0.252143	-6.9665	3.24919e-12	1.83143e-10
FAHD2CP	17.2453	3.65747	0.525085	6.96547	3.27298e-12	1.84e-10
PARP2	256.128	2.04168	0.293149	6.96463	3.29268e-12	1.84623e-10
TMEM167A	907.534	-1.72321	0.247634	-6.95868	3.4348e-12	1.91589e-10
OGFR	212.018	-2.77989	0.400002	-6.94968	3.66114e-12	2.03683e-10
PIK3R5	654.37	-3.16117	0.455114	-6.94588	3.76096e-12	2.08694e-10
PARP1	991.276	1.83257	0.263904	6.94407	3.80956e-12	2.10845e-10
P2RY13	307.429	-5.08432	0.732969	-6.93661	4.01629e-12	2.21714e-10
TTLL5	251.604	1.24015	0.178912	6.93165	4.15974e-12	2.29042e-10
CSK	472.434	-1.60811	0.232216	-6.92505	4.35825e-12	2.39357e-10
MSH6	423.848	1.79376	0.259049	6.92442	4.37771e-12	2.39811e-10
ITGAX	1258.43	-3.71697	0.537239	-6.91865	4.55965e-12	2.4914e-10
SNAPC2	93.9955	-1.85419	0.268121	-6.91552	4.66158e-12	2.54062e-10
CCT2	1355.33	1.36362	0.197375	6.90879	4.88811e-12	2.65732e-10
MZB1	182.474	6.4511	0.933993	6.90701	4.94988e-12	2.68409e-10
TIMP1	2091.3	-2.64053	0.382824	-6.8975	5.29241e-12	2.86258e-10
ZNF256	161.487	2.85897	0.414678	6.89443	5.40824e-12	2.91786e-10
RP11.486G15.2	21.5231	5.02098	0.728371	6.89344	5.44607e-12	2.92328e-10
KLHDC2	657.435	1.26145	0.183002	6.89309	5.45922e-12	2.92328e-10
RIN2	179.711	-6.00588	0.871265	-6.89329	5.45179e-12	2.92328e-10
RBBP7	1076.86	1.22691	0.178021	6.89194	5.50364e-12	2.93971e-10
PID1	66.3636	-9.53056	1.38394	-6.88653	5.71691e-12	3.04603e-10
CHD1L	604.496	1.46715	0.21313	6.88383	5.82664e-12	3.0968e-10
MRPS30	357.4	1.07543	0.156346	6.87856	6.04614e-12	3.20329e-10
ITGB2.AS1	267.142	-3.8202	0.555399	-6.8783	6.05691e-12	3.20329e-10
DENR	950.297	1.01446	0.147593	6.87333	6.27185e-12	3.30878e-10
ZNF227	75.2015	2.00017	0.291312	6.86606	6.59988e-12	3.47329e-10
PRELID1	450.633	-1.70117	0.247828	-6.86431	6.68157e-12	3.50766e-10
LUCAT1	137.757	-4.9667	0.724227	-6.85794	6.98611e-12	3.65857e-10
RP11.58E21.3	52.9603	-4.43787	0.647171	-6.85733	7.01612e-12	3.66532e-10
DOK2	660.328	-3.47419	0.50688	-6.85406	7.17828e-12	3.74091e-10
IFNAR2	331.295	-1.40362	0.204846	-6.85209	7.27764e-12	3.78349e-10
SIGLEC10	429.341	-4.16908	0.60878	-6.84825	7.47606e-12	3.87723e-10
STX12	275.345	-1.44852	0.211698	-6.8424	7.78759e-12	4.01949e-10
S100A6	3014.37	-2.30316	0.336601	-6.8424	7.78789e-12	4.01949e-10
MFSD2A	116.059	-4.03848	0.590262	-6.84184	7.81843e-12	4.02555e-10
HTATSF1P2	27.6481	-2.84772	0.416905	-6.83063	8.45443e-12	4.33219e-10
FLII	1364.37	-1.19023	0.174246	-6.83073	8.44855e-12	4.33219e-10
PLA2G6	124.318	2.18839	0.320445	6.82924	8.53667e-12	4.36389e-10
CYBB	2168.48	-6.00436	0.879325	-6.82838	8.58806e-12	4.3797e-10
SERPINA1	5542.5	-7.11006	1.04146	-6.82703	8.6688e-12	4.41038e-10
ALDH18A1	411.246	2.60843	0.382116	6.82628	8.71455e-12	4.42315e-10
AIF1	3037.85	-2.83402	0.415192	-6.82581	8.74294e-12	4.42707e-10
CEBPB	113.376	-3.81864	0.559972	-6.81934	9.14598e-12	4.62023e-10
ARHGAP30	1471.97	-1.43079	0.210114	-6.80958	9.78868e-12	4.93327e-10
SRGAP2B	91.5499	-2.5291	0.371542	-6.80705	9.96197e-12	5.00514e-10
PRKACA	37.1897	-2.38432	0.350284	-6.80682	9.97803e-12	5.00514e-10
SLC38A5	136.884	3.82551	0.562172	6.80487	1.01138e-11	5.06137e-10
SPIN1	470.837	1.37202	0.20165	6.80398	1.01771e-11	5.08118e-10
RP11.350G8.5	19.0279	-3.87405	0.569528	-6.80222	1.03019e-11	5.13157e-10
IL18BP	170.697	-3.06396	0.450605	-6.79965	1.04873e-11	5.21177e-10
ARHGEF10L	153.129	-6.32515	0.930432	-6.79808	1.06024e-11	5.24462e-10
WAS	172.767	-2.05068	0.301644	-6.79834	1.05833e-11	5.24462e-10
FFAR2	93.9138	-6.57796	0.96784	-6.79654	1.07164e-11	5.28883e-10
ZNF273	87.0264	2.33029	0.342989	6.79407	1.09017e-11	5.36788e-10
CD209	12.7188	-8.3057	1.22283	-6.79219	1.10447e-11	5.42582e-10
FLVCR2	125.75	-4.41026	0.650103	-6.78394	1.16938e-11	5.73158e-10
KLF4	1475.24	-3.72717	0.549577	-6.78188	1.18619e-11	5.80068e-10
EGFL7	399.343	4.10185	0.604926	6.78075	1.19557e-11	5.83325e-10
EBPL	209.165	2.34931	0.346538	6.77937	1.20702e-11	5.8757e-10
IFNGR1	1970.65	-2.29531	0.338897	-6.77287	1.26249e-11	6.13181e-10
THBD	184.881	-5.76753	0.851787	-6.7711	1.27811e-11	6.19363e-10
SNX21	32.2156	-3.75341	0.554971	-6.76325	1.34926e-11	6.52365e-10
LAMTOR4	649.848	-1.36788	0.202452	-6.75655	1.41313e-11	6.81706e-10
SLA2	151.977	3.82355	0.566157	6.75351	1.44306e-11	6.94581e-10
CAMTA2	99.2326	-2.10261	0.311477	-6.75043	1.47405e-11	7.07909e-10
C1orf162	1614.17	-3.68448	0.546176	-6.74595	1.52025e-11	7.28464e-10
FAM20C	15.7489	-4.79074	0.710289	-6.74478	1.53259e-11	7.32735e-10
B4GALT1	945.106	-2.21164	0.327998	-6.74284	1.55325e-11	7.40959e-10
C12orf23	232.591	3.32677	0.493827	6.7367	1.62026e-11	7.7121e-10
LRBA	289.16	2.37073	0.351976	6.73549	1.63373e-11	7.75895e-10
FGD2	693.661	-5.21006	0.773719	-6.73378	1.65312e-11	7.83368e-10
ZNF418	39.8188	5.04164	0.749038	6.73083	1.68703e-11	7.9767e-10
PITPNM1	224.337	-2.77453	0.412598	-6.72452	1.76172e-11	8.3115e-10
ANGPT1	756.186	5.16442	0.768145	6.72323	1.77741e-11	8.34877e-10
TOLLIP	317.296	-1.76428	0.262414	-6.72326	1.77706e-11	8.34877e-10
SLC31A1	268.609	-2.55164	0.379639	-6.72124	1.80183e-11	8.44497e-10
CLIP1	566.832	-1.55078	0.23098	-6.7139	1.89492e-11	8.86187e-10
SDCBP	4845.39	-2.03023	0.302525	-6.71096	1.93346e-11	9.0224e-10
ANXA2P2	16.2976	-2.82415	0.42092	-6.70946	1.95341e-11	9.09567e-10
LTA4H	1557.14	-2.23321	0.332904	-6.70828	1.96934e-11	9.14995e-10
HSPG2	37.0122	4.23111	0.631153	6.70378	2.03098e-11	9.39122e-10
CCL20	58.196	-9.30624	1.38826	-6.70353	2.03442e-11	9.39122e-10
LILRB1	407.7	-5.33374	0.795657	-6.70357	2.0339e-11	9.39122e-10
TRO	70.5277	8.4665	1.26371	6.6997	2.08851e-11	9.62018e-10
CDCA7L	417.409	2.7679	0.413206	6.6986	2.10421e-11	9.67169e-10
PTPN18	756.883	-2.15246	0.321549	-6.69404	2.1709e-11	9.94959e-10
LANCL1	311.786	2.26338	0.338129	6.69384	2.17396e-11	9.94959e-10
OBSCN	39.8684	3.94126	0.589171	6.6895	2.23936e-11	1.0227e-09
TREM1	1449.15	-4.70143	0.702967	-6.68799	2.26261e-11	1.03113e-09
RHOG	1179.22	-1.60837	0.240566	-6.68575	2.29741e-11	1.04255e-09
CHMP4B	66.6772	-2.30815	0.345226	-6.6859	2.29505e-11	1.04255e-09
SERPINB2	197.284	-8.09073	1.21048	-6.68393	2.32621e-11	1.05338e-09
CREB3L4	93.0521	2.38371	0.356687	6.68292	2.34234e-11	1.05754e-09
TXNRD3	43.525	3.46307	0.518212	6.68273	2.34527e-11	1.05754e-09
DPYD	902.362	-2.3595	0.353243	-6.67952	2.39722e-11	1.0787e-09
SLC35F6	308.583	-2.08792	0.31265	-6.67814	2.41998e-11	1.08666e-09
SMAP2	1457.25	-2.36472	0.354147	-6.67721	2.43535e-11	1.09127e-09
NOTCH2	703.639	-1.96158	0.293786	-6.67689	2.44058e-11	1.09133e-09
MNDA	1411.17	-5.79526	0.86807	-6.67603	2.45502e-11	1.0955e-09
BEST1	208.663	-3.28604	0.492252	-6.67552	2.46353e-11	1.09701e-09
RP11.102N12.3	18.2407	-7.44495	1.11566	-6.67314	2.50385e-11	1.11159e-09
LINC00968	10.5513	-5.73136	0.858892	-6.67298	2.50664e-11	1.11159e-09
NUCB2	1780.29	2.41336	0.36177	6.67097	2.54116e-11	1.12457e-09
FRAT1	28.3989	-2.51231	0.376739	-6.66858	2.5829e-11	1.14069e-09
PLEC	429.574	-2.91046	0.436755	-6.66384	2.66771e-11	1.17571e-09
CDH9	20.6678	19.8173	2.97633	6.6583	2.7701e-11	1.21833e-09
SMCO4	178.855	-3.95161	0.593833	-6.65441	2.84441e-11	1.24845e-09
RFWD3	381.037	1.86373	0.280093	6.65395	2.85329e-11	1.24979e-09
CD101	156.456	-6.15978	0.925961	-6.65231	2.88538e-11	1.25869e-09
DKFZP761J1410	189.389	-2.85764	0.429562	-6.65246	2.88241e-11	1.25869e-09
LTBR	581.112	-1.81818	0.273333	-6.6519	2.89341e-11	1.25963e-09
MYOZ3	17.2707	7.33388	1.10297	6.64921	2.94665e-11	1.28021e-09
FAN1	91.4107	1.84041	0.276845	6.64781	2.97478e-11	1.28981e-09
SLC26A11	56.8437	-5.80256	0.873049	-6.64632	3.00515e-11	1.30035e-09
CHST7	53.8135	-3.22446	0.485528	-6.64114	3.11267e-11	1.34416e-09
PELI3	38.2854	-3.40928	0.513497	-6.63933	3.15104e-11	1.35527e-09
EPN1	115.538	-1.91496	0.288415	-6.63959	3.14558e-11	1.35527e-09
TNFSF10	453.777	-3.80011	0.57247	-6.63809	3.17771e-11	1.364e-09
NUDCD2	330.153	1.20275	0.181297	6.63417	3.26323e-11	1.3979e-09
LXN	159.785	2.543	0.38349	6.6312	3.32966e-11	1.42351e-09
ATP6V1B2	1877.9	-1.6822	0.253916	-6.62503	3.47187e-11	1.48135e-09
AP003774.6	7.95865	-7.08961	1.0703	-6.62393	3.49778e-11	1.48944e-09
TYROBP	2717.17	-3.4325	0.518698	-6.61752	3.65266e-11	1.55231e-09
AC009951.1	215.419	-2.55429	0.386179	-6.61426	3.73405e-11	1.58375e-09
MMP24.AS1	77.4988	-1.58308	0.239511	-6.60963	3.85288e-11	1.63093e-09
CNIH4	397.463	-1.72646	0.261306	-6.60703	3.9212e-11	1.65331e-09
CPA3	731.355	6.84169	1.03549	6.60718	3.91715e-11	1.65331e-09
TGFBRAP1	304.702	1.95409	0.29587	6.60457	3.98685e-11	1.67769e-09
ARPC3	2817.92	-1.10178	0.166859	-6.60304	4.02823e-11	1.68911e-09
PPP4C	898.983	-1.0184	0.154233	-6.60298	4.02975e-11	1.68911e-09
RP11.213H15.1	16.6693	-3.98234	0.603523	-6.59848	4.15388e-11	1.73773e-09
ZNF70	35.0287	3.41321	0.517511	6.59543	4.2402e-11	1.76694e-09
CAPN2	1740.33	-2.59124	0.393248	-6.58932	4.41859e-11	1.83771e-09
FCGR3A	1552.94	-8.12491	1.2336	-6.58634	4.50794e-11	1.87123e-09
CTSZ	127.233	-2.89914	0.440375	-6.58334	4.59999e-11	1.90575e-09
NPEPL1	67.2106	-1.96698	0.298829	-6.5823	4.63213e-11	1.91536e-09
SLC15A3	74.1411	-5.53582	0.841402	-6.57928	4.72734e-11	1.95096e-09
SRD5A1	129.885	-2.36055	0.358805	-6.57892	4.73884e-11	1.95195e-09
UPP1	728.515	-4.69237	0.713376	-6.57769	4.7782e-11	1.96438e-09
MAP1A	171.569	5.11701	0.778062	6.57662	4.81278e-11	1.97481e-09
TSPO	1657.59	-2.0893	0.317716	-6.57599	4.83306e-11	1.97934e-09
DEF8	236.416	-1.7571	0.267296	-6.5736	4.91119e-11	2.0075e-09
PCSK5	32.0234	-5.45122	0.829838	-6.56902	5.06481e-11	2.06635e-09
NCF1C	167.681	-6.13473	0.934481	-6.56485	5.20843e-11	2.11843e-09
FAM49B	1698.86	-1.27236	0.193817	-6.56474	5.21226e-11	2.11843e-09
FTH1P8	94.9978	-2.36203	0.359969	-6.56175	5.31784e-11	2.15725e-09
IQSEC1	202.837	-3.72528	0.567896	-6.55979	5.38818e-11	2.17344e-09
RASGEF1B	1659.85	-2.49517	0.380359	-6.56006	5.37877e-11	2.17344e-09
ARHGEF1	1176.98	-1.5459	0.235644	-6.56032	5.36928e-11	2.17344e-09
ZFP36	15445.5	-2.35167	0.35857	-6.55846	5.43679e-11	2.18892e-09
RP11.480I12.5	19.3083	6.57503	1.00386	6.54976	5.76278e-11	2.31148e-09
HLTF	205.144	2.3449	0.358012	6.54978	5.76214e-11	2.31148e-09
ACSL1	1579.02	-2.66354	0.406708	-6.54901	5.79193e-11	2.3145e-09
UNC119B	131.498	2.73953	0.418297	6.54925	5.78285e-11	2.3145e-09
NAE1	440.964	1.59927	0.244266	6.54727	5.85989e-11	2.3373e-09
MCM7	1120.27	2.22006	0.339209	6.54482	5.95684e-11	2.37155e-09
MYO1F	2720.93	-2.2598	0.34538	-6.54293	6.0326e-11	2.39726e-09
COX11	241.878	1.36199	0.20819	6.54205	6.06801e-11	2.40686e-09
C9orf43	45.8983	5.23006	0.799965	6.53786	6.24055e-11	2.47073e-09
INPPL1	185.174	-1.56195	0.238954	-6.53661	6.29305e-11	2.48692e-09
PHLDA2	121.933	-5.12045	0.783551	-6.53493	6.36384e-11	2.51026e-09
AC006953.1	12.8934	-4.74839	0.726907	-6.53233	6.47558e-11	2.54964e-09
HDAC4	102.5	-2.28226	0.34957	-6.52875	6.63214e-11	2.60649e-09
ACER3	268.527	-1.69962	0.260375	-6.52758	6.68425e-11	2.62216e-09
CCR5	94.3448	-5.92745	0.90864	-6.52343	6.87192e-11	2.69085e-09
DDX1	854.174	1.56071	0.239268	6.52284	6.89877e-11	2.69644e-09
LGALS2	344.28	-5.65379	0.866985	-6.52121	6.97424e-11	2.72097e-09
LIMK1	109.182	-2.0219	0.310188	-6.51831	7.11026e-11	2.76899e-09
AC004381.6	106.267	3.42675	0.525945	6.51542	7.24858e-11	2.81774e-09
PGAM1	356.874	-1.78709	0.274475	-6.51095	7.4677e-11	2.89766e-09
NUP35	72.5963	2.33606	0.358841	6.51001	7.51437e-11	2.91049e-09
PDRG1	201.509	1.57953	0.242673	6.50887	7.57177e-11	2.92743e-09
CCL4	1398.52	-4.89874	0.752955	-6.50603	7.71651e-11	2.97802e-09
NFKB2	238.744	-3.05672	0.469871	-6.50545	7.74609e-11	2.98406e-09
FCGR2A	1055.61	-4.77271	0.734402	-6.49877	8.09811e-11	3.11406e-09
GPSM3	660.26	-1.49609	0.230229	-6.49826	8.12523e-11	3.11889e-09
FBP1	328.612	-4.73432	0.728834	-6.49574	8.26246e-11	3.1659e-09
FNIP2	138.218	-2.68976	0.414215	-6.49363	8.37937e-11	3.20496e-09
MIR22HG	476.306	-3.62254	0.558313	-6.48837	8.677e-11	3.31288e-09
ALDH5A1	80.8142	4.2483	0.654899	6.48695	8.75886e-11	3.33819e-09
RP11.779O18.3	11.4948	-3.60345	0.555698	-6.48455	8.89973e-11	3.3827e-09
COTL1	3671.7	-3.90905	0.602837	-6.48442	8.90723e-11	3.3827e-09
SAMHD1	2219.72	-3.15068	0.486091	-6.48168	9.07054e-11	3.43862e-09
PPP1R9B	44.7245	-1.79141	0.276491	-6.47907	9.22897e-11	3.4925e-09
ZNF524	51.9044	-1.49016	0.230021	-6.47836	9.27233e-11	3.50272e-09
ZBTB7A	51.0924	-2.53607	0.39163	-6.47569	9.43783e-11	3.55896e-09
HTATSF1	545.034	1.10652	0.170908	6.47437	9.52106e-11	3.58404e-09
NOD2	425.166	-4.64648	0.718505	-6.46688	1.0005e-10	3.7596e-09
NBPF18P	8.85043	-4.71498	0.729328	-6.46483	1.01412e-10	3.79274e-09
TLR4	625.804	-5.39921	0.835176	-6.46475	1.01463e-10	3.79274e-09
SAMD10	30.0814	4.60321	0.71199	6.46528	1.01111e-10	3.79274e-09
TEX10	315.204	1.71398	0.265226	6.46233	1.03101e-10	3.84726e-09
ZCCHC6	683.494	-1.52276	0.235658	-6.46174	1.03505e-10	3.85559e-09
NOG	67.6974	5.58645	0.865324	6.4559	1.07578e-10	4.00039e-09
RP1.228H13.2	7.12346	-6.69469	1.03716	-6.45484	1.08334e-10	4.02149e-09
OSBPL11	264.192	-2.53696	0.393097	-6.45379	1.09088e-10	4.0425e-09
DARS	938.155	1.11009	0.172015	6.45348	1.09308e-10	4.04365e-09
TMEM127	620.944	-1.85795	0.287982	-6.45162	1.10661e-10	4.08665e-09
FAM198B	312.048	-5.78909	0.897353	-6.4513	1.10893e-10	4.08814e-09
TRBC2	183.622	6.58491	1.02081	6.45068	1.11349e-10	4.09792e-09
CD1D	411.906	-6.08045	0.943699	-6.44321	1.16974e-10	4.29755e-09
NUP107	362.42	1.50375	0.233451	6.44139	1.18382e-10	4.34181e-09
SCML2	129.243	3.88295	0.602918	6.44026	1.1927e-10	4.36691e-09
TLR2	833.3	-2.85434	0.443316	-6.43861	1.20572e-10	4.40649e-09
TBC1D2	351.915	-2.50316	0.388788	-6.43837	1.20763e-10	4.40649e-09
EFHD2	1486.31	-2.48802	0.3865	-6.4373	1.21616e-10	4.4301e-09
NEDD9	409.697	-3.51586	0.546504	-6.43337	1.24806e-10	4.53859e-09
MTMR14	1002.95	-1.29994	0.202077	-6.43292	1.25177e-10	4.54435e-09
C10orf54	5696.29	-2.65878	0.413713	-6.42662	1.30468e-10	4.72843e-09
IKZF2	31.3655	6.4912	1.01044	6.42416	1.32603e-10	4.79766e-09
VPS37C	83.6951	-2.16489	0.337056	-6.42293	1.33673e-10	4.82822e-09
AC068580.6	25.6274	-5.5607	0.866095	-6.42043	1.35892e-10	4.90012e-09
SYN2	8.44367	-7.68785	1.19838	-6.41518	1.40658e-10	5.06347e-09
ZNF660	37.2398	2.84579	0.444473	6.40262	1.52729e-10	5.48878e-09
ACOT9	377.623	-1.50907	0.235737	-6.4015	1.53856e-10	5.52001e-09
CD300LB	215.553	-5.13116	0.802413	-6.39466	1.60906e-10	5.7633e-09
LINC00426	50.0805	5.26304	0.823533	6.39081	1.65013e-10	5.90052e-09
HIGD2A	370.564	-1.37522	0.215271	-6.38831	1.67726e-10	5.98752e-09
RRP7B	80.9824	1.65112	0.258484	6.38769	1.68406e-10	6.00179e-09
ARPC4	654.416	-1.18567	0.185672	-6.38582	1.70485e-10	6.0658e-09
CTC.260E6.6	13.6353	3.47395	0.544355	6.38178	1.75041e-10	6.2073e-09
BCAS4	26.0634	5.16576	0.809436	6.38193	1.74873e-10	6.2073e-09
GMIP	581.699	-1.74186	0.27304	-6.37952	1.77638e-10	6.28898e-09
TLR5	136.952	-6.70125	1.05093	-6.37647	1.81213e-10	6.40495e-09
ACVRL1	10.1637	-7.68639	1.20558	-6.37565	1.82187e-10	6.42875e-09
HOOK3	495.124	-1.39724	0.219162	-6.37535	1.82546e-10	6.43085e-09
PLD3	1506.39	-2.06307	0.323697	-6.37347	1.84794e-10	6.49935e-09
TIGD1	114.481	2.07335	0.325406	6.37157	1.87102e-10	6.56972e-09
BTG2	5086.19	-2.21553	0.348223	-6.36238	1.98651e-10	6.96385e-09
IL13RA1	822.927	-4.08054	0.641601	-6.35993	2.01839e-10	7.06404e-09
DOK4	22.6223	5.24717	0.825194	6.35871	2.03455e-10	7.10898e-09
AP001056.1	7.52118	-4.71117	0.74182	-6.35083	2.14163e-10	7.47093e-09
MAST4.AS1	7.57361	5.77025	0.909113	6.34713	2.19375e-10	7.6403e-09
MMP28	21.8091	7.28149	1.14738	6.34617	2.20746e-10	7.67559e-09
JUNB	7029.77	-2.53332	0.399227	-6.34555	2.21631e-10	7.69386e-09
CCDC171	73.6658	3.36326	0.530135	6.34416	2.23646e-10	7.75124e-09
AC091177.1	4.17886	-6.46563	1.02001	-6.33879	2.31571e-10	8.01283e-09
CLEC4G	17.5615	-6.51197	1.02736	-6.33855	2.31941e-10	8.01283e-09
BID	1087	-1.78822	0.282211	-6.33647	2.35083e-10	8.10829e-09
BAALC	296.729	5.56155	0.877975	6.33452	2.38087e-10	8.1987e-09
PRCP	804.683	-2.0613	0.325554	-6.33168	2.42514e-10	8.33772e-09
ZNF154	65.9914	3.90122	0.616989	6.32299	2.56549e-10	8.80611e-09
CNTN1	32.8695	19.2451	3.04435	6.32157	2.58918e-10	8.87321e-09
ADM	1034.62	-5.95452	0.94205	-6.32081	2.60196e-10	8.90278e-09
EPB41L3	227.324	-8.39567	1.32833	-6.32048	2.60751e-10	8.90753e-09
PAPSS2	84.6393	-3.90957	0.619331	-6.31257	2.74432e-10	9.35997e-09
TTLL4	184.683	-2.18663	0.346428	-6.31194	2.75556e-10	9.38336e-09
TMSB4X	21146.4	-1.67311	0.265181	-6.30933	2.80247e-10	9.52796e-09
PFDN5	1820.52	-1.23508	0.195836	-6.30669	2.85063e-10	9.67634e-09
NACC2	59.1642	-3.47956	0.55227	-6.30048	2.96733e-10	1.00565e-08
FAM49A	913.37	-3.10809	0.493352	-6.29995	2.97751e-10	1.00751e-08
DLEC1	13.2047	-3.08953	0.490661	-6.29667	3.04108e-10	1.0274e-08
ZNF814	89.7862	2.08534	0.331278	6.29486	3.07683e-10	1.03784e-08
PYCR1	80.264	4.82514	0.766708	6.29332	3.10744e-10	1.04651e-08
OSGIN1	21.233	-4.15535	0.660514	-6.29108	3.1527e-10	1.05843e-08
CCDC102A	8.91913	5.32587	0.847414	6.28486	3.28159e-10	1.09997e-08
FAM69B	31.7812	5.24339	0.834398	6.28404	3.29876e-10	1.104e-08
AHR	1377.87	-2.49195	0.396578	-6.28362	3.30775e-10	1.10528e-08
CHMP1B	1363.73	-1.40972	0.224388	-6.2825	3.33176e-10	1.11157e-08
LYZ	30582.9	-4.96369	0.790454	-6.27954	3.39581e-10	1.12942e-08
AQP9	202.374	-8.56327	1.36367	-6.27956	3.39531e-10	1.12942e-08
TASP1	136.896	1.7253	0.274811	6.27812	3.4269e-10	1.138e-08
DYTN	32.451	7.28334	1.16107	6.27294	3.54298e-10	1.17472e-08
GAA	863.208	-2.90388	0.463397	-6.2665	3.69257e-10	1.22243e-08
SCMH1	195.286	2.23769	0.35725	6.26365	3.76058e-10	1.24302e-08
SMC4	593.546	1.889	0.301611	6.26302	3.77582e-10	1.24614e-08
RCN2	329.453	1.91899	0.30647	6.26161	3.81034e-10	1.2556e-08
VIM.AS1	181.46	-2.20223	0.351981	-6.25668	3.93251e-10	1.29386e-08
ATP6AP2	2432.64	-1.35906	0.217254	-6.25565	3.95876e-10	1.3005e-08
POLR3E	356.071	1.06131	0.169872	6.2477	4.16534e-10	1.36627e-08
MSANTD3	23.1357	2.9532	0.472722	6.24722	4.17833e-10	1.36844e-08
SGSH	364.258	-5.05962	0.81001	-6.24637	4.20109e-10	1.37379e-08
LY96	96.1797	-4.10877	0.657975	-6.24458	4.24947e-10	1.38749e-08
MOB3A	705.468	-1.51077	0.241983	-6.24331	4.28396e-10	1.39662e-08
RAB11FIP1	1212.24	-2.10791	0.337676	-6.24241	4.30882e-10	1.40259e-08
SLC7A1	113.315	1.96629	0.315047	6.24125	4.34082e-10	1.41087e-08
BCL2L11	234.794	-4.03955	0.647265	-6.24095	4.34911e-10	1.41142e-08
TTC24	139.764	4.4729	0.716731	6.2407	4.35621e-10	1.41158e-08
RP11.367G6.3	175.197	2.61011	0.418435	6.2378	4.43768e-10	1.43581e-08
MYO5C	106.27	4.02762	0.64572	6.2374	4.44903e-10	1.43731e-08
CCDC62	8.7469	3.90484	0.626182	6.23594	4.49059e-10	1.44855e-08
IGHEP2	72.5423	-2.30937	0.37063	-6.23094	4.63643e-10	1.49335e-08
TMEM25	73.2457	5.03997	0.809455	6.22638	4.77333e-10	1.53513e-08
BTBD19	97.7562	-2.40648	0.386742	-6.22245	4.89446e-10	1.57173e-08
CD68	7.95109	-5.17536	0.831783	-6.22201	4.90814e-10	1.57377e-08
RP11.1023L17.1	27.996	2.33061	0.374953	6.21572	5.10888e-10	1.63568e-08
EFCAB7	46.8751	2.19387	0.353316	6.20936	5.31996e-10	1.69818e-08
SMC3	767.678	1.23632	0.199196	6.20652	5.41701e-10	1.72659e-08
PEX13	197.34	1.29484	0.208656	6.20561	5.4486e-10	1.73151e-08
CDK2	144.26	2.09285	0.337242	6.20578	5.44278e-10	1.73151e-08
ZNF345	79.101	2.33729	0.376751	6.2038	5.51168e-10	1.74896e-08
CASP6	285.373	2.15766	0.347844	6.20296	5.54123e-10	1.75573e-08
MINK1	202.013	-2.60583	0.420275	-6.2003	5.63555e-10	1.78298e-08
TMEM189	177.812	-1.73354	0.27965	-6.19896	5.68383e-10	1.7956e-08
ACTB	70835.5	-1.48042	0.238982	-6.19468	5.84018e-10	1.84228e-08
PLEKHB2	1518.37	-1.80406	0.291281	-6.19353	5.88312e-10	1.85038e-08
PLEKHM1	312.882	-1.49915	0.242104	-6.19216	5.93441e-10	1.86377e-08
CX3CR1	821.006	-6.81892	1.10253	-6.18478	6.21894e-10	1.95027e-08
ODF3B	269.762	-4.3	0.695446	-6.18308	6.28645e-10	1.96856e-08
IPMK	103.948	-1.59041	0.257295	-6.18125	6.35961e-10	1.98856e-08
RP11.701P16.2	47.863	-3.92629	0.63529	-6.18031	6.39768e-10	1.99755e-08
HAUS5	189.212	1.50472	0.243481	6.18006	6.40769e-10	1.99776e-08
AC074289.1	86.4346	-3.49961	0.566315	-6.17962	6.42552e-10	2.00041e-08
PAFAH1B3	83.818	1.97322	0.319475	6.17645	6.55592e-10	2.03804e-08
ILF2	1765.02	1.10068	0.178329	6.17219	6.73496e-10	2.09067e-08
EEF1E1	90.1631	1.67267	0.271043	6.17125	6.77516e-10	2.1001e-08
NLRC4	91.5639	-5.1192	0.829792	-6.16926	6.86108e-10	2.12366e-08
CRIP1	118.468	-2.65479	0.43048	-6.16706	6.95735e-10	2.15035e-08
NCEH1	158.767	-2.80022	0.454604	-6.1597	7.28814e-10	2.24935e-08
PRDM1	212.955	-3.89356	0.632298	-6.15779	7.37654e-10	2.27336e-08
PAXIP1.AS1	100.155	1.97573	0.32098	6.1553	7.49349e-10	2.30608e-08
RN7SL600P	30.4331	-2.554	0.415094	-6.15282	7.61173e-10	2.33911e-08
POLE	180.475	1.70101	0.276575	6.15029	7.73429e-10	2.37336e-08
FAM60A	609.449	1.46773	0.238745	6.14767	7.86306e-10	2.40942e-08
PTAFR	991.633	-5.10165	0.830651	-6.14175	8.16189e-10	2.49742e-08
PLEKHO2	964.654	-2.26534	0.369001	-6.13912	8.29796e-10	2.53543e-08
ZYX	2566.86	-1.8542	0.302056	-6.13859	8.3256e-10	2.54026e-08
CYTL1	281.698	5.5105	0.898989	6.12967	8.8063e-10	2.6831e-08
C12orf5	184.403	-2.52418	0.411859	-6.12874	8.85751e-10	2.69487e-08
ATF5	45.2847	-2.63516	0.43005	-6.12756	8.92346e-10	2.71109e-08
SH3BGRL3	7268.2	-1.60113	0.261392	-6.12541	9.04514e-10	2.74416e-08
TMEM150B	27.3376	-4.37847	0.714954	-6.12412	9.11835e-10	2.76246e-08
CASP1	1015.8	-2.55895	0.417919	-6.12307	9.17871e-10	2.77682e-08
GNG5	1112.91	-1.11419	0.181992	-6.1222	9.22901e-10	2.7881e-08
FPR2	112.565	-7.12689	1.16433	-6.12104	9.29682e-10	2.80463e-08
DPY19L2	103.258	7.85814	1.28395	6.1203	9.34013e-10	2.81373e-08
TNFSF13	124.038	-2.23685	0.36556	-6.11895	9.41916e-10	2.83355e-08
MPL	171.016	5.9591	0.974207	6.11687	9.54321e-10	2.8599e-08
SCAI	72.1503	2.02811	0.331563	6.11681	9.54678e-10	2.8599e-08
RP11.667K14.3	13.7161	-3.03721	0.496502	-6.11721	9.52279e-10	2.8599e-08
PGM2L1	146.108	2.46576	0.40328	6.11427	9.69977e-10	2.90167e-08
OCIAD2	189.443	3.19231	0.522636	6.1081	1.00825e-09	3.0075e-08
C22orf29	154.033	1.67076	0.273541	6.10789	1.00957e-09	3.0075e-08
NAGA	922.359	-2.50576	0.410236	-6.1081	1.00826e-09	3.0075e-08
RNF13	740.454	-1.37778	0.225625	-6.10649	1.01849e-09	3.02986e-08
TMEM220	106.43	2.67897	0.438762	6.10574	1.02326e-09	3.03984e-08
DNAJB12	383.645	-1.20289	0.197077	-6.10362	1.0369e-09	3.07608e-08
RP11.354E11.2	319.726	7.06357	1.15806	6.09947	1.06419e-09	3.15269e-08
ABI3	234.081	-5.35678	0.878435	-6.0981	1.07337e-09	3.17547e-08
DNAAF2	190.209	1.54762	0.253801	6.09776	1.07565e-09	3.17784e-08
STMN3	124.119	2.73814	0.449153	6.09623	1.08601e-09	3.20402e-08
NPM2	41.5478	5.01276	0.822869	6.09182	1.11636e-09	3.28905e-08
TMEM17	21.784	4.19764	0.689174	6.09084	1.12323e-09	3.3002e-08
TOR2A	262.28	-1.26103	0.207037	-6.09085	1.12314e-09	3.3002e-08
RBM47	417.121	-4.62049	0.758773	-6.08942	1.1332e-09	3.32494e-08
ITGA9	76.0551	4.31665	0.709431	6.08466	1.1674e-09	3.4206e-08
NEAT1	5837.5	-2.35786	0.387699	-6.08166	1.18943e-09	3.48039e-08
ZNF775	45.9559	2.65513	0.43671	6.07985	1.20296e-09	3.51516e-08
RFC4	145.063	2.16686	0.356444	6.07912	1.20847e-09	3.52167e-08
MCM2	552.225	3.0659	0.504567	6.07631	1.22982e-09	3.579e-08
RP11.327F22.1	11.8072	-3.25876	0.536496	-6.07415	1.24648e-09	3.62256e-08
RP11.1275H24.3	45.5877	2.87062	0.472992	6.06907	1.28652e-09	3.73388e-08
LRRC34	31.8691	3.59062	0.591746	6.06785	1.29636e-09	3.75733e-08
PDE8A	103.883	-2.20712	0.363764	-6.06744	1.29963e-09	3.76173e-08
LST1	1416.56	-2.83767	0.46774	-6.06676	1.30519e-09	3.77272e-08
HCLS1	2911.1	-1.72879	0.285073	-6.06438	1.3246e-09	3.82367e-08
CTA.384D8.36	9.54809	-2.76412	0.456404	-6.0563	1.39291e-09	4.01545e-08
SLC43A1	196.691	2.68311	0.443072	6.05569	1.3982e-09	4.02528e-08
FTH1	3776.18	-2.42235	0.400053	-6.05507	1.40355e-09	4.03525e-08
NBPF10	194.587	-1.63219	0.269617	-6.05374	1.41517e-09	4.06322e-08
CTD.2162K18.5	28.2676	2.85041	0.471342	6.04745	1.47159e-09	4.21954e-08
TFR2	107.607	5.19412	0.858957	6.04701	1.47559e-09	4.22536e-08
TIMP3	12.9719	7.03348	1.16347	6.04525	1.49181e-09	4.2661e-08
MRPS27	285.792	1.43114	0.236781	6.04414	1.5021e-09	4.28979e-08
MIDN	114.941	-2.06065	0.341041	-6.04224	1.51987e-09	4.33477e-08
AKR1C3	380.61	3.15588	0.522471	6.04028	1.53843e-09	4.38188e-08
TP53BP1	256.532	1.78245	0.295131	6.03953	1.54565e-09	4.39657e-08
PLA1A	10.5766	-6.12333	1.01394	-6.03912	1.54955e-09	4.40184e-08
TFE3	366.006	-1.43024	0.236955	-6.03592	1.58063e-09	4.48416e-08
CCDC159	141.808	-1.41691	0.23488	-6.03248	1.61462e-09	4.57455e-08
GLMN	96.4183	1.73846	0.288315	6.0297	1.64262e-09	4.64668e-08
NLE1	47.1659	2.39342	0.39695	6.02953	1.64442e-09	4.64668e-08
RP11.706O15.1	33.9441	2.59006	0.429774	6.02655	1.675e-09	4.72686e-08
RP11.251M1.1	17.7858	6.61879	1.09849	6.02536	1.68736e-09	4.7537e-08
BCL2	73.9969	2.49979	0.414889	6.02521	1.68895e-09	4.7537e-08
TNPO2	97.3496	1.01883	0.169131	6.02391	1.70248e-09	4.78549e-08
SRA1	406.326	-1.87692	0.311632	-6.02288	1.71339e-09	4.80986e-08
JAK2	648.005	-1.85419	0.307915	-6.02175	1.72539e-09	4.83718e-08
STK10	1242.03	-1.55407	0.258105	-6.02106	1.73279e-09	4.8516e-08
TLR1	369.193	-2.08173	0.345805	-6.01994	1.74479e-09	4.87879e-08
SNX18	160.583	-2.39787	0.398391	-6.0189	1.75603e-09	4.90383e-08
SYT17	9.98611	-7.02947	1.16811	-6.01782	1.76781e-09	4.9303e-08
MNT	82.4744	-2.05135	0.34096	-6.01641	1.78327e-09	4.96161e-08
RRAS	275.553	-3.41247	0.567197	-6.01637	1.78367e-09	4.96161e-08
MSL3	343.547	-1.0641	0.177329	-6.00071	1.96458e-09	5.45777e-08
ZSCAN30	162.636	2.05265	0.342394	5.99498	2.03508e-09	5.6463e-08
CD63	3434.31	-1.73194	0.289121	-5.99037	2.09363e-09	5.80121e-08
MPEG1	2278.64	-5.81791	0.971309	-5.98976	2.10149e-09	5.80796e-08
CNST	911.247	1.52967	0.255437	5.98844	2.11863e-09	5.84781e-08
CDC7	111.521	2.32716	0.38881	5.98533	2.15948e-09	5.95288e-08
LZTFL1	99.2879	1.89487	0.317113	5.97537	2.29567e-09	6.32018e-08
RP11.588K22.2	20.9807	4.59528	0.769104	5.97484	2.30315e-09	6.33262e-08
SAT2	281.577	-1.69701	0.284132	-5.97262	2.33469e-09	6.41112e-08
APOBR	96.8822	-2.84454	0.476519	-5.96942	2.381e-09	6.52991e-08
CPPED1	1194.38	-2.33004	0.390483	-5.96707	2.41552e-09	6.61612e-08
TARS	697.988	1.19122	0.199723	5.96439	2.45554e-09	6.70858e-08
TUBGCP4	241.42	1.5523	0.260331	5.96278	2.47984e-09	6.76633e-08
RN7SL473P	31.7463	-2.79793	0.469527	-5.95904	2.53729e-09	6.91429e-08
TYK2	933.859	-1.13634	0.190732	-5.95782	2.55628e-09	6.95717e-08
KIAA1432	268.771	-1.79665	0.301575	-5.95757	2.56011e-09	6.95876e-08
DERL3	63.7427	3.70283	0.62164	5.95656	2.5761e-09	6.99334e-08
MTL5	109.342	2.03884	0.342641	5.95037	2.67537e-09	7.24446e-08
VPS9D1	53.3689	-2.07073	0.348022	-5.95	2.6814e-09	7.25162e-08
GZF1	295.819	-1.88299	0.316707	-5.94552	2.75583e-09	7.44352e-08
STMN1	2514.87	3.26613	0.549807	5.9405	2.84159e-09	7.65784e-08
ZNF134	395.593	1.83692	0.309222	5.94045	2.84233e-09	7.65784e-08
LIN9	52.6582	2.33596	0.39343	5.93742	2.89537e-09	7.79096e-08
TMEM175	234.516	-1.35424	0.228128	-5.9363	2.91527e-09	7.83464e-08
DNAJC5	245.115	-1.93919	0.3269	-5.93207	2.99145e-09	8.01926e-08
LEKR1	53.0039	-2.0911	0.352571	-5.93099	3.01115e-09	8.06198e-08
MDK	206.524	4.42412	0.746272	5.9283	3.06093e-09	8.18503e-08
ANXA2	3909.87	-2.62547	0.443057	-5.92581	3.10756e-09	8.28903e-08
DNMT3B	146.631	4.04763	0.683043	5.92588	3.10628e-09	8.28903e-08
DNM2	971.902	-1.07423	0.181298	-5.9252	3.11912e-09	8.3095e-08
ZNF135	37.3328	5.6684	0.95674	5.9247	3.12874e-09	8.32478e-08
RRAD	53.2922	-5.88389	0.993274	-5.92373	3.1472e-09	8.36351e-08
GAR1	110.875	1.82986	0.309136	5.91929	3.23333e-09	8.58174e-08
MYO9B	540.49	-2.12522	0.359052	-5.91896	3.23983e-09	8.58836e-08
RP4.684O24.5	7.04904	-6.20078	1.04787	-5.91751	3.26844e-09	8.65348e-08
NAMPTL	93.0478	-3.55847	0.601503	-5.91597	3.29935e-09	8.72454e-08
RIN1	74.8579	-3.20376	0.541584	-5.91553	3.30802e-09	8.73668e-08
RP11.802E16.3	18.5301	-2.27046	0.383835	-5.91521	3.31448e-09	8.74278e-08
MRPL42	633.402	1.06375	0.17984	5.91501	3.31849e-09	8.74278e-08
FAR1	407.684	-1.77683	0.300548	-5.91197	3.38033e-09	8.89477e-08
CECR1	1949.4	-3.92772	0.664521	-5.9106	3.40865e-09	8.95826e-08
KCNK5	98.9181	4.29092	0.726023	5.91017	3.41759e-09	8.95978e-08
ZNF43	202.327	2.34593	0.396931	5.91018	3.41735e-09	8.95978e-08
IGHM	845.994	6.31828	1.06934	5.90856	3.45116e-09	9.03673e-08
IMPDH2	640.933	1.54973	0.262424	5.90543	3.51719e-09	9.19836e-08
TMEM64	49.3001	2.58491	0.437749	5.905	3.52638e-09	9.21118e-08
EPHB2	7.50631	-7.51847	1.27345	-5.904	3.54796e-09	9.25625e-08
AC008984.7	7.36932	-5.63213	0.953994	-5.90373	3.55368e-09	9.25988e-08
ATG7	376.176	-1.67337	0.283561	-5.90126	3.60735e-09	9.38832e-08
SNX27	679.831	-1.7793	0.301555	-5.90041	3.62598e-09	9.42535e-08
LMNA	4670.31	-2.65091	0.449547	-5.89686	3.70475e-09	9.61843e-08
SLC8A1	154.364	-6.04139	1.02469	-5.89583	3.72805e-09	9.6576e-08
KCTD12	203.1	-4.97914	0.844524	-5.89579	3.72885e-09	9.6576e-08
ARAP1.AS2	11.0244	-3.32049	0.563238	-5.89535	3.73886e-09	9.67182e-08
UCK2	263.148	1.70223	0.288893	5.89226	3.80947e-09	9.82995e-08
TCTN2	24.7466	3.53207	0.599462	5.89208	3.81376e-09	9.82995e-08
SVOPL	20.2315	5.63157	0.956164	5.88975	3.8678e-09	9.95726e-08
GAMT	58.7425	3.15053	0.53508	5.88796	3.90997e-09	1.00537e-07
IRAK3	814.18	-1.65427	0.281032	-5.88643	3.94631e-09	1.0135e-07
CTD.2561J22.5	27.6971	5.69093	0.966881	5.88586	3.95982e-09	1.01575e-07
RAB35	223.598	-1.20355	0.20449	-5.88559	3.96627e-09	1.01619e-07
METAP1D	61.0877	2.73423	0.464846	5.88201	4.05315e-09	1.03605e-07
ADPRM	215.411	1.70438	0.289763	5.882	4.05345e-09	1.03605e-07
JOSD2	62.9982	-2.13159	0.362599	-5.87864	4.13651e-09	1.05602e-07
LYST	1550.48	-2.17527	0.370056	-5.87822	4.14693e-09	1.05742e-07
ZNF66	56.5874	2.18148	0.371144	5.87774	4.15918e-09	1.05928e-07
ARAP3	30.1624	-4.90908	0.835649	-5.87458	4.23925e-09	1.07634e-07
KB.1507C5.4	33.2441	-4.28053	0.728663	-5.8745	4.24125e-09	1.07634e-07
ATP6V0A2	381.915	1.7188	0.292567	5.87487	4.23167e-09	1.07634e-07
TET1	37.9862	4.42708	0.753767	5.87327	4.27283e-09	1.08307e-07
C11orf49	158.1	1.58793	0.270441	5.87163	4.31524e-09	1.09253e-07
FAM161A	22.548	3.24072	0.552078	5.87004	4.35688e-09	1.10177e-07
PFAS	196.692	1.66803	0.284266	5.86785	4.41486e-09	1.1138e-07
CD86	909.927	-5.59274	0.953224	-5.86719	4.43256e-09	1.11695e-07
RP4.607J23.2	8.40497	-4.95199	0.844051	-5.86694	4.43919e-09	1.11731e-07
TFPI	526.24	4.07635	0.695087	5.86453	4.50417e-09	1.13233e-07
HSPA7	34.2526	-7.29093	1.24343	-5.86357	4.53008e-09	1.13751e-07
YPEL1	32.9677	3.29554	0.562238	5.86146	4.58802e-09	1.15071e-07
CCDC138	62.9997	2.30852	0.393868	5.86115	4.59677e-09	1.15156e-07
CTSL	429.479	-5.5302	0.944065	-5.85786	4.68864e-09	1.1732e-07
CD302	222.034	-1.65882	0.28341	-5.85309	4.82525e-09	1.20598e-07
PFKFB3	1177.83	-2.80236	0.479503	-5.84431	5.08686e-09	1.26988e-07
ZNF667	69.9722	6.07151	1.03905	5.84334	5.11653e-09	1.2758e-07
HS1BP3	236.832	-1.46297	0.250435	-5.84172	5.1665e-09	1.28676e-07
CTD.2545M3.8	14.8765	-2.95745	0.506349	-5.84073	5.1974e-09	1.29295e-07
RP11.340F14.5	12.1626	-3.13433	0.536811	-5.83878	5.25835e-09	1.3066e-07
NUDT16	202.789	-2.1059	0.36075	-5.83756	5.29701e-09	1.31468e-07
CBX2	89.5149	4.92035	0.842976	5.83688	5.31864e-09	1.31852e-07
MSR1	146.718	-5.53796	0.949103	-5.83494	5.38087e-09	1.3324e-07
ARHGDIA	588.901	-1.36959	0.234771	-5.8337	5.42109e-09	1.34081e-07
MDN1	175.367	1.25587	0.215368	5.83127	5.50081e-09	1.35896e-07
DPY19L2P2	32.9398	4.08445	0.700586	5.83005	5.54097e-09	1.36731e-07
GUSBP5	12.1959	5.28205	0.906042	5.8298	5.54929e-09	1.36778e-07
NLRP1	929.199	-2.70182	0.463565	-5.82835	5.59766e-09	1.37812e-07
TIPARP.AS1	8.73468	-2.30493	0.395562	-5.82698	5.64411e-09	1.38796e-07
SIRT2	476.494	-1.09271	0.187535	-5.82669	5.65373e-09	1.38873e-07
MTF2	790.211	1.67005	0.286704	5.82498	5.71194e-09	1.39822e-07
PHACTR1	724.652	-2.4928	0.427937	-5.82517	5.70559e-09	1.39822e-07
AP003733.1	151.21	-3.3215	0.570181	-5.82535	5.69937e-09	1.39822e-07
CD79A	60.6081	5.70509	0.979609	5.82385	5.75073e-09	1.40611e-07
TADA2B	29.8278	-2.06975	0.355515	-5.82185	5.81991e-09	1.4214e-07
COMMD9	706.93	-1.24664	0.214239	-5.81895	5.92175e-09	1.44462e-07
RP11.63P12.6	19.8426	-4.17934	0.718384	-5.81771	5.96608e-09	1.45378e-07
RPP40	81.7145	2.28062	0.392176	5.8153	6.05267e-09	1.47321e-07
PM20D2	355.711	2.51823	0.433193	5.81319	6.12949e-09	1.49021e-07
TRPM4	33.4244	-5.09573	0.877058	-5.81003	6.24633e-09	1.51689e-07
MRM1	43.1843	3.06864	0.528231	5.80928	6.27423e-09	1.52195e-07
SETMAR	85.9154	1.86103	0.320983	5.7979	6.71489e-09	1.62699e-07
NOTCH2NL	191.275	-1.40455	0.242347	-5.79563	6.80664e-09	1.6455e-07
NFKBIZ	8576.31	-2.6961	0.465189	-5.79572	6.80296e-09	1.6455e-07
SIRT7	210.872	-1.61274	0.278422	-5.79241	6.93817e-09	1.67541e-07
IL27	3.79258	-5.97744	1.03231	-5.79036	7.02368e-09	1.69415e-07
PI4K2A	167.16	-4.39336	0.75913	-5.78736	7.14999e-09	1.72267e-07
AVPI1	83.2888	-2.65737	0.459188	-5.78711	7.16067e-09	1.72331e-07
REEP5	742.296	-1.90176	0.328742	-5.78497	7.25253e-09	1.74346e-07
KLHL2	97.4726	-2.3211	0.401273	-5.78436	7.27909e-09	1.74788e-07
HK2	549.383	-2.69732	0.466431	-5.7829	7.34234e-09	1.76109e-07
AP001055.6	40.5195	-3.21147	0.555391	-5.78236	7.36599e-09	1.76479e-07
PRKACB	871.182	1.85356	0.320639	5.78085	7.43229e-09	1.77868e-07
POLE2	63.992	3.80079	0.657519	5.7805	7.44801e-09	1.78046e-07
BLOC1S1	101.029	-1.23591	0.213828	-5.77995	7.4723e-09	1.78427e-07
MYB	643.98	2.78926	0.482738	5.778	7.55952e-09	1.80309e-07
AGO1	387.704	-1.03039	0.178395	-5.7759	7.65433e-09	1.82367e-07
WDFY1	876.852	-2.07889	0.360013	-5.77449	7.71877e-09	1.83698e-07
BACH1	956.334	-2.09348	0.36268	-5.77227	7.82123e-09	1.8593e-07
FAM179B	276.893	1.43989	0.249678	5.76697	8.07079e-09	1.9165e-07
NRBF2	246.078	-1.29	0.223708	-5.76646	8.09533e-09	1.91807e-07
C12orf29	104.164	1.87057	0.324377	5.76664	8.08668e-09	1.91807e-07
NCKAP5L	115.278	-1.63739	0.284061	-5.76421	8.20408e-09	1.94169e-07
LMAN1	398.275	1.24079	0.215318	5.76259	8.28336e-09	1.95829e-07
SEMA6B	21.3777	-5.43946	0.944336	-5.76009	8.4068e-09	1.98528e-07
PPP1R12C	52.4314	-1.88054	0.326581	-5.75827	8.4981e-09	2.00464e-07
DCAF16	280.48	1.32354	0.229955	5.75563	8.63188e-09	2.03395e-07
CD48	298.424	-4.66856	0.811373	-5.75391	8.72035e-09	2.05254e-07
CLMN	143.825	-2.53088	0.439904	-5.75324	8.75466e-09	2.05836e-07
TMED5	681.481	-1.3067	0.227276	-5.7494	8.95592e-09	2.10336e-07
CSTA	558.493	-5.48362	0.95418	-5.74694	9.08733e-09	2.13189e-07
AC132872.1	22.5964	-3.54526	0.617001	-5.74596	9.14022e-09	2.14195e-07
IGHV1.2	27.6053	17.9974	3.13343	5.74367	9.26436e-09	2.16867e-07
CCDC34	19.1479	4.1181	0.717332	5.74086	9.41966e-09	2.20262e-07
TPMT	334.137	-1.1616	0.202393	-5.73933	9.50492e-09	2.22013e-07
PARP16	144.934	1.53955	0.268294	5.7383	9.56309e-09	2.23128e-07
ODF2L	236.33	1.59411	0.27793	5.73564	9.71451e-09	2.26415e-07
ANKRD22	41.6612	-6.75018	1.17713	-5.73442	9.78465e-09	2.27801e-07
IRAK1	533.952	-1.89019	0.329944	-5.72882	1.0113e-08	2.35191e-07
DDX31	62.2414	1.76864	0.308739	5.72861	1.01258e-08	2.35232e-07
FPR3	18.7188	-6.27218	1.09544	-5.72573	1.02991e-08	2.39e-07
FARSB	418.518	1.69982	0.296914	5.72496	1.03459e-08	2.39602e-07
CSE1L	525.134	1.31902	0.230398	5.72493	1.03474e-08	2.39602e-07
RBMX	1613.5	1.03228	0.180348	5.72382	1.04157e-08	2.40921e-07
UBTD1	30.2905	-3.44095	0.601193	-5.72354	1.0433e-08	2.41061e-07
CCBL1	34.2691	2.2473	0.392921	5.71946	1.06863e-08	2.46649e-07
NBEAL2	541.897	-2.14393	0.374864	-5.71922	1.07013e-08	2.46728e-07
ZNF550	123.522	2.2907	0.400814	5.71512	1.09623e-08	2.52476e-07
SIRPAP1	6.85865	-5.77975	1.01135	-5.71488	1.0978e-08	2.52565e-07
OFD1	402.652	1.43492	0.25114	5.71363	1.10592e-08	2.5416e-07
POLR2D	244.775	1.01013	0.176809	5.71312	1.10926e-08	2.54654e-07
KLHL23	59.1075	3.82974	0.670536	5.71146	1.12012e-08	2.56872e-07
MSH2	310.627	2.6882	0.470907	5.70856	1.13937e-08	2.61006e-07
NPM3	43.7839	1.94902	0.341515	5.70697	1.15007e-08	2.63176e-07
TCF3	79.9869	1.46877	0.257414	5.70587	1.15749e-08	2.64593e-07
PGD	2353.77	-1.31429	0.230362	-5.70531	1.16134e-08	2.6519e-07
LARS	724.046	1.3063	0.229017	5.70393	1.17073e-08	2.67049e-07
RP11.65J3.1	32.1084	-4.14104	0.726372	-5.70099	1.1911e-08	2.71407e-07
IFT140	89.6879	1.99138	0.349412	5.69925	1.20339e-08	2.73915e-07
SPTA1	39.8051	3.75785	0.659482	5.69819	1.21088e-08	2.75036e-07
RP11.925D8.3	11.3298	-7.53288	1.32196	-5.69827	1.21031e-08	2.75036e-07
ABCD1	144.187	-2.27884	0.399942	-5.69793	1.21268e-08	2.75153e-07
C20orf24	194.537	-1.41549	0.248478	-5.69662	1.22203e-08	2.7698e-07
CTD.2659N19.9	3.51938	-6.24727	1.09712	-5.69422	1.23936e-08	2.80612e-07
ERO1L	511.55	-2.05412	0.361026	-5.68968	1.27276e-08	2.87869e-07
NASP	776.976	1.39057	0.244557	5.68608	1.29989e-08	2.93695e-07
DHRS11	66.6606	2.82669	0.497741	5.67903	1.35457e-08	3.05406e-07
RP1.90J20.11	12.8528	-2.67488	0.471045	-5.67861	1.35793e-08	3.05841e-07
CACNA2D3	33.8258	-4.6332	0.816094	-5.67729	1.36846e-08	3.0789e-07
TICAM1	285.554	-2.39373	0.421855	-5.67429	1.39265e-08	3.13003e-07
RNF141	468.503	-1.54488	0.272454	-5.67025	1.42587e-08	3.20133e-07
NFIL3	250.147	-3.10812	0.548312	-5.66853	1.44028e-08	3.23029e-07
IL10	43.6072	-6.68137	1.1798	-5.66314	1.48625e-08	3.32992e-07
C3	25.8185	-6.07007	1.07192	-5.66279	1.48932e-08	3.33331e-07
SNX30	158.184	-2.66802	0.471294	-5.66106	1.50444e-08	3.36363e-07
LIG1	280.455	1.90346	0.336249	5.66087	1.50608e-08	3.3638e-07
RNF135	495.484	-1.38551	0.244777	-5.6603	1.51106e-08	3.37141e-07
STAMBPL1	33.066	3.20405	0.566293	5.65794	1.53201e-08	3.41458e-07
MYL6B	80.4141	1.68754	0.298328	5.65667	1.54342e-08	3.43287e-07
RP11.477J21.6	11.0521	6.30096	1.11421	5.65507	1.55785e-08	3.46137e-07
NAGPA	208.107	-1.56149	0.27634	-5.65061	1.59878e-08	3.54863e-07
AIFM3	27.5529	-2.97628	0.526919	-5.64845	1.61897e-08	3.58972e-07
CEBPD	295.397	-5.0071	0.886741	-5.64664	1.63618e-08	3.62038e-07
MNS1	40.4076	2.95528	0.523361	5.64674	1.6352e-08	3.62038e-07
UNC93B1	510.239	-2.51145	0.444823	-5.64596	1.64263e-08	3.63092e-07
AP5B1	130.303	-3.37685	0.598192	-5.6451	1.65089e-08	3.6454e-07
PPARGC1B	88.551	-2.24963	0.398661	-5.64297	1.67137e-08	3.68682e-07
PPP1R15B	1307.48	-1.68945	0.299481	-5.64127	1.68801e-08	3.71969e-07
AEBP1	92.1951	5.28181	0.936332	5.64096	1.69103e-08	3.72252e-07
IFT74	138.793	1.45901	0.258658	5.6407	1.69356e-08	3.72427e-07
ITGAM	761.092	-4.1356	0.733304	-5.63968	1.70365e-08	3.74261e-07
MTBP	45.0457	2.46042	0.436365	5.63843	1.71607e-08	3.76602e-07
CSTB	826.521	-2.0252	0.359356	-5.63564	1.74413e-08	3.8237e-07
AC108004.3	39.3593	3.89117	0.690523	5.63511	1.7495e-08	3.83154e-07
FEZ1	17.3702	-8.03184	1.42577	-5.63335	1.76746e-08	3.86694e-07
LYRM7	259.553	1.67789	0.297929	5.63184	1.78299e-08	3.89406e-07
ZNF737	53.2433	2.94046	0.522118	5.63179	1.7835e-08	3.89406e-07
RNASEH2B	489.514	1.06549	0.18939	5.62587	1.84575e-08	4.02588e-07
RP11.750H9.5	152.423	-2.13363	0.379298	-5.6252	1.85291e-08	4.03739e-07
GPRC5A	16.9898	-7.7947	1.38662	-5.62136	1.89457e-08	4.12396e-07
PCBP1	531.557	-1.53027	0.272266	-5.62049	1.90417e-08	4.14064e-07
NEIL2	68.1992	1.71943	0.305968	5.61964	1.91352e-08	4.15676e-07
IMPDH1	695.595	-1.87347	0.333542	-5.6169	1.94418e-08	4.21908e-07
BZW2	680.831	1.41291	0.251564	5.6165	1.94863e-08	4.22447e-07
CMSS1	107.011	2.08835	0.371952	5.61457	1.97048e-08	4.26053e-07
WT1	42.4996	5.57758	0.993434	5.61444	1.97198e-08	4.26053e-07
CEP290	97.2538	1.6676	0.29701	5.6146	1.97016e-08	4.26053e-07
SNRPD1	511.113	1.32975	0.236849	5.61433	1.97322e-08	4.26053e-07
ZNF606	98.65	2.17583	0.387616	5.61336	1.98431e-08	4.28016e-07
PPP6R1	444.023	1.68289	0.299848	5.61247	1.99464e-08	4.29811e-07
TKT	2617.11	-1.77326	0.316144	-5.60902	2.03472e-08	4.38007e-07
TMEM67	69.389	3.05376	0.54455	5.60787	2.04831e-08	4.4049e-07
SMYD5	76.1804	1.70079	0.303397	5.60581	2.07285e-08	4.45319e-07
MAPRE2	1133.75	1.10346	0.196852	5.60552	2.0763e-08	4.45615e-07
AGFG1	171.757	-2.09787	0.374426	-5.60289	2.10805e-08	4.51975e-07
SPATS2	117.455	1.8098	0.323104	5.60129	2.12757e-08	4.55704e-07
RP11.617D20.1	21.192	3.04631	0.544276	5.59698	2.18113e-08	4.66709e-07
NAP1L4	784.446	1.2176	0.217654	5.59419	2.2166e-08	4.73825e-07
GLTPD2	9.19439	-5.40127	0.96586	-5.59219	2.2422e-08	4.78821e-07
TRIM59	116.087	1.94344	0.347598	5.59106	2.25683e-08	4.81466e-07
RPS26P21	9.92654	-4.82629	0.863452	-5.58953	2.27687e-08	4.85257e-07
TPGS2	582.911	1.3804	0.247122	5.58592	2.32468e-08	4.94953e-07
KIF2A	270.302	1.27465	0.228277	5.58377	2.3536e-08	5.00341e-07
PLAGL2	295.183	-1.66523	0.298232	-5.58369	2.35466e-08	5.00341e-07
GLTP	580.674	-1.52739	0.273559	-5.5834	2.35855e-08	5.00672e-07
GPR56	352.153	4.92229	0.882992	5.57456	2.4816e-08	5.25751e-07
ZNF493	179.392	2.06056	0.369722	5.57329	2.4998e-08	5.29083e-07
MEX3B	69.5469	3.20426	0.57501	5.57254	2.51053e-08	5.30829e-07
ANKMY2	245.4	1.53085	0.27474	5.572	2.51836e-08	5.31961e-07
CAP1	5006.1	-1.06523	0.191184	-5.57176	2.52175e-08	5.32152e-07
MAP7	166.849	3.21907	0.578267	5.56676	2.59518e-08	5.47107e-07
PRX	34.2994	5.49081	0.986724	5.56468	2.62627e-08	5.53119e-07
CFLAR	1004.53	-1.11373	0.200193	-5.5633	2.64716e-08	5.5662e-07
ZFAND5	2468.26	-1.6938	0.304463	-5.56324	2.6481e-08	5.5662e-07
EVI2B	990.17	-2.04064	0.366828	-5.56292	2.65301e-08	5.57107e-07
PTPRE	1760.6	-2.23466	0.401833	-5.56116	2.67994e-08	5.62209e-07
GPR137B	51.3185	-2.92401	0.526021	-5.55874	2.71734e-08	5.69499e-07
TTC26	31.4648	3.14672	0.566629	5.5534	2.80158e-08	5.8658e-07
DYRK3	105.518	3.71466	0.669107	5.55166	2.82962e-08	5.91871e-07
MRPS31P5	15.5129	2.99412	0.539436	5.55047	2.84909e-08	5.94782e-07
DMXL2	631.979	-3.32542	0.599112	-5.55058	2.84727e-08	5.94782e-07
GPR89A	34.7861	1.21204	0.218413	5.54929	2.86832e-08	5.98214e-07
CENPJ	208.94	1.99171	0.359065	5.54693	2.90729e-08	6.05751e-07
PEA15	460.981	-1.7621	0.317789	-5.54489	2.94136e-08	6.11661e-07
NEDD4	100.415	2.28335	0.411848	5.54417	2.95358e-08	6.13606e-07
RP11.416A14.1	10.5594	4.62235	0.834012	5.5423	2.98521e-08	6.1907e-07
P2RY2	133.74	-4.22023	0.761462	-5.54228	2.98566e-08	6.1907e-07
PDXK	286.849	-2.20797	0.398519	-5.54044	3.01715e-08	6.24993e-07
PIK3R2.1	2.90186	-5.54708	1.00171	-5.53759	3.06665e-08	6.34634e-07
COL24A1	341.831	3.19999	0.577954	5.53676	3.08117e-08	6.37022e-07
NPTN	68.1467	-1.44266	0.260615	-5.5356	3.10159e-08	6.40626e-07
ZDHHC7	559.275	-2.25359	0.407153	-5.53499	3.11252e-08	6.42265e-07
MT2A	717.524	-3.81995	0.690332	-5.53349	3.1392e-08	6.46524e-07
UBE2Q2P1	82.4365	2.14806	0.388342	5.53138	3.17721e-08	6.53725e-07
ARSB	276.111	-1.46171	0.264325	-5.52996	3.20297e-08	6.58392e-07
SPPL2A	464.895	-1.58418	0.286496	-5.52949	3.21171e-08	6.59555e-07
CALN1	37.4417	8.13492	1.47205	5.52626	3.27128e-08	6.71144e-07
EHMT2	271.17	1.14693	0.20761	5.52441	3.30591e-08	6.776e-07
MRPL1	145.26	1.55301	0.281126	5.52424	3.30913e-08	6.77613e-07
ELF4	416.02	-1.93765	0.350816	-5.52326	3.32772e-08	6.80769e-07
CD69	6619.17	2.62325	0.474977	5.5229	3.33448e-08	6.815e-07
DNAJC6	58.4216	6.09388	1.10362	5.52174	3.35661e-08	6.85368e-07
GCSAML	201.111	5.69587	1.03165	5.52112	3.36837e-08	6.86463e-07
PTCD3	663.373	1.15751	0.209651	5.52115	3.36786e-08	6.86463e-07
NOP58	979.551	1.44277	0.26159	5.51541	3.47972e-08	7.07626e-07
DDX50	236.763	1.12106	0.203265	5.51529	3.48213e-08	7.07626e-07
ARVCF	29.2963	3.8728	0.702179	5.51541	3.4797e-08	7.07626e-07
TTYH2	155.555	-2.02008	0.366324	-5.51447	3.49836e-08	7.09577e-07
ATG3	1195.96	-1.06153	0.192516	-5.51401	3.50752e-08	7.10761e-07
AP2S1	398.207	-1.30169	0.236107	-5.51314	3.52486e-08	7.13602e-07
BMS1	309.938	1.05095	0.190697	5.5111	3.56593e-08	7.21233e-07
SH2B3	447.717	-1.85748	0.337176	-5.50892	3.61033e-08	7.29099e-07
P2RX4	878.903	-1.76785	0.32092	-5.5087	3.61503e-08	7.29099e-07
EXOSC8	430.19	1.3926	0.252799	5.5087	3.61503e-08	7.29099e-07
TNFRSF10B	698.555	-1.91801	0.348312	-5.50659	3.65861e-08	7.37194e-07
RP11.848G14.5	12.6998	-3.51083	0.637708	-5.50539	3.68354e-08	7.41074e-07
TRPV4	11.0645	-7.74014	1.40598	-5.50516	3.68824e-08	7.41074e-07
HMGN1	1642.83	1.47191	0.267362	5.50531	3.68514e-08	7.41074e-07
SOCS3	1712.13	-2.51793	0.457415	-5.5047	3.69803e-08	7.42345e-07
FLNA	3374.92	-1.91505	0.348081	-5.50174	3.76069e-08	7.54215e-07
LSM10	241.475	-1.41228	0.256743	-5.50077	3.78145e-08	7.57671e-07
S100PBP	236.946	1.45077	0.26375	5.50056	3.78588e-08	7.57848e-07
C17orf80	84.3231	1.96328	0.356959	5.50001	3.79775e-08	7.59514e-07
MTMR3	421.393	-1.52018	0.276497	-5.49801	3.84093e-08	7.67434e-07
ST8SIA4	372.932	-1.49551	0.272037	-5.49744	3.8534e-08	7.68491e-07
PRMT5	219.361	1.6824	0.306024	5.4976	3.84986e-08	7.68491e-07
TRIM36	15.1868	-5.04777	0.918326	-5.49671	3.86947e-08	7.70979e-07
FAM21C	173.098	-1.03026	0.187539	-5.49356	3.93903e-08	7.84108e-07
SLC27A3	212.613	-2.48929	0.45316	-5.49319	3.94729e-08	7.85024e-07
IGHJ3	12.1459	6.73957	1.22702	5.49264	3.95975e-08	7.8677e-07
COPS7B	199.199	1.03478	0.188402	5.49243	3.96441e-08	7.86966e-07
RAPH1	11.5453	-6.17609	1.1247	-5.49131	3.98968e-08	7.91249e-07
THOP1	201.6	1.3987	0.254795	5.48949	4.03103e-08	7.97768e-07
RAB3A	9.21017	-3.12694	0.569636	-5.48937	4.03372e-08	7.97768e-07
CAPN11	37.2166	3.97183	0.723661	5.48852	4.05318e-08	8.00876e-07
RLTPR	7.20242	4.10405	0.747835	5.48791	4.06709e-08	8.02886e-07
STYK1	15.0228	6.86618	1.25313	5.47922	4.272e-08	8.42559e-07
MIIP	310.923	-1.19488	0.218226	-5.4754	4.36531e-08	8.5943e-07
HIF1A.AS2	12.5359	-3.04934	0.556918	-5.47539	4.36556e-08	8.5943e-07
DENND4B	611.248	-1.52255	0.278147	-5.4739	4.40247e-08	8.65867e-07
RP11.701P16.5	37.1955	-4.33235	0.79148	-5.47374	4.40634e-08	8.65867e-07
RP11.797A18.4	5.58167	-3.93079	0.718458	-5.47115	4.47119e-08	8.77803e-07
TRIM8	154.643	-1.27205	0.232564	-5.46968	4.50858e-08	8.84335e-07
ACP6	53.4497	2.91962	0.533947	5.468	4.55129e-08	8.91895e-07
GPR125	20.896	3.96949	0.726007	5.46757	4.56241e-08	8.9315e-07
AC005682.5	13.4878	2.9717	0.543528	5.46743	4.56604e-08	8.9315e-07
HPS4	380.218	1.28945	0.235892	5.46628	4.59577e-08	8.97616e-07
EFHC2	67.8809	4.49716	0.822718	5.46622	4.59725e-08	8.97616e-07
FAM227B	31.6983	2.13211	0.390279	5.46304	4.68046e-08	9.13031e-07
MEST	1162.26	4.60037	0.842234	5.46211	4.70515e-08	9.17011e-07
ZFP82	77.033	2.43009	0.445065	5.46009	4.75906e-08	9.26676e-07
SRGN	7695.14	-2.1698	0.397407	-5.4599	4.76401e-08	9.26796e-07
PA2G4	546.606	1.26906	0.232451	5.45949	4.77498e-08	9.28088e-07
NLRP12	132.718	-6.29616	1.15373	-5.45721	4.83667e-08	9.39226e-07
CEP57L1	104.45	1.87129	0.342947	5.45651	4.85592e-08	9.41257e-07
ALDH6A1	182.115	1.4276	0.261628	5.45659	4.85354e-08	9.41257e-07
CEP57	499.733	1.29185	0.236773	5.45606	4.86823e-08	9.42791e-07
AE000661.37	116.041	5.39166	0.988459	5.45461	4.90796e-08	9.49626e-07
ALDOA	6114.08	-1.15147	0.211193	-5.45223	4.97411e-08	9.61557e-07
CLEC14A	42.3548	7.62309	1.39848	5.45098	5.00923e-08	9.67473e-07
SVIP	141.798	2.41561	0.443307	5.44907	5.06344e-08	9.77061e-07
VIMP	485.084	-1.23969	0.227594	-5.44694	5.12441e-08	9.87937e-07
SLC9A1	125.288	-1.89536	0.348032	-5.44594	5.15328e-08	9.92609e-07
TAF9B	195.971	1.20546	0.221475	5.44288	5.24267e-08	1.00892e-06
NOL3	8.90481	-4.13036	0.758922	-5.44239	5.2569e-08	1.01075e-06
CCL3	930.614	-3.89888	0.716564	-5.44108	5.29581e-08	1.01732e-06
CTB.31N19.3	43.5038	-2.40293	0.441733	-5.43979	5.33444e-08	1.02382e-06
SRGAP2	256.015	-1.93452	0.355664	-5.43919	5.3522e-08	1.02563e-06
ZNF710	41.0859	-2.34046	0.430298	-5.43915	5.35342e-08	1.02563e-06
ZNF567	81.7064	2.00499	0.368662	5.43856	5.37143e-08	1.02816e-06
KCNQ1	21.9526	-4.41216	0.811436	-5.43747	5.4042e-08	1.0335e-06
CCDC169	18.2658	4.00086	0.735961	5.43625	5.44141e-08	1.03969e-06
SLC16A3	560.081	-3.12724	0.57528	-5.43604	5.44779e-08	1.03998e-06
KCNE1	94.7162	-6.38353	1.1747	-5.43418	5.50492e-08	1.04995e-06
GPSM1	52.63	3.25414	0.598927	5.43328	5.53261e-08	1.0543e-06
SLC27A2	112.628	3.81312	0.701876	5.43276	5.549e-08	1.05648e-06
CA1	319.984	11.6111	2.13796	5.4309	5.607e-08	1.06624e-06
PRKCDBP	26.3269	-7.48747	1.37871	-5.4308	5.61021e-08	1.06624e-06
KCTD5	199.249	-1.14403	0.210673	-5.43038	5.62326e-08	1.06777e-06
RFC5	194.296	2.01137	0.370403	5.43021	5.62872e-08	1.06786e-06
FCGR1A	56.4252	-3.50089	0.644867	-5.42885	5.67176e-08	1.07507e-06
MIPEP	84.9388	2.10192	0.38721	5.42837	5.68718e-08	1.07704e-06
AIRN	8.70735	-5.72891	1.05579	-5.42616	5.75795e-08	1.08948e-06
HADH	289.239	1.71799	0.316976	5.41994	5.96181e-08	1.12706e-06
ARHGAP11B	68.6115	1.84104	0.339689	5.41977	5.9675e-08	1.12714e-06
ITM2C	1749.54	3.10932	0.573837	5.41848	6.01075e-08	1.13431e-06
P2RX7	266.154	-2.39425	0.442326	-5.41287	6.20233e-08	1.16943e-06
LILRB5	11.7997	-6.88565	1.27324	-5.40797	6.37426e-08	1.19869e-06
TBXA2R	58.1402	5.70898	1.0557	5.40778	6.38124e-08	1.19894e-06
C19orf48	438.01	1.94579	0.360057	5.40413	6.51255e-08	1.22254e-06
BST1	532.196	-2.69236	0.498245	-5.40369	6.52853e-08	1.22447e-06
AC021188.4	6.78191	4.87734	0.902914	5.40178	6.59834e-08	1.23648e-06
GABRE	5.90227	-15.3342	2.83928	-5.40074	6.63678e-08	1.2426e-06
TOX	221.621	2.99494	0.55462	5.39998	6.66465e-08	1.24673e-06
RHOU	42.0657	-4.7715	0.883713	-5.39938	6.68708e-08	1.24967e-06
POLD2	403.347	1.82792	0.338562	5.39909	6.69791e-08	1.24967e-06
RSPH1	10.4994	6.63958	1.22974	5.39916	6.69519e-08	1.24967e-06
CORO1B	403.602	-1.8586	0.344388	-5.39684	6.78247e-08	1.26435e-06
PDPK1	156.198	-1.39678	0.258863	-5.39584	6.82047e-08	1.27033e-06
GPR84	153.27	-4.41539	0.818336	-5.39557	6.83051e-08	1.27109e-06
RP11.262D11.2	5.14574	-2.58026	0.478363	-5.39393	6.89321e-08	1.28165e-06
UBA5	296.453	1.31207	0.24327	5.39346	6.91148e-08	1.28393e-06
RNPEP	557.645	-1.74787	0.324105	-5.39293	6.93177e-08	1.28658e-06
AC093415.2	11.9755	4.68981	0.869937	5.39097	7.00775e-08	1.29956e-06
LDHB	3312.64	1.61251	0.299189	5.3896	7.0613e-08	1.30662e-06
RP11.305O6.3	25.6268	3.39442	0.629808	5.38961	7.06126e-08	1.30662e-06
HERPUD1	2496.73	-2.23747	0.415197	-5.38894	7.0873e-08	1.30977e-06
RP11.334C17.5	17.7898	-5.84041	1.08389	-5.38836	7.11049e-08	1.31293e-06
ZNF773	111.762	1.84597	0.342709	5.38641	7.18794e-08	1.32609e-06
PTPRC	4859.22	-1.62304	0.301373	-5.38548	7.22525e-08	1.33182e-06
GADD45B	2153.16	-3.01414	0.55994	-5.38297	7.32681e-08	1.34938e-06
SLC9A8	158.353	-1.42852	0.265459	-5.38132	7.39424e-08	1.36063e-06
TEC	241.612	1.77432	0.329812	5.37978	7.45767e-08	1.37046e-06
CD93	355.293	-4.14381	0.770266	-5.37971	7.46045e-08	1.37046e-06
MS4A4A	276.33	-4.8257	0.897417	-5.37732	7.56032e-08	1.38761e-06
MCM6	377.598	2.5128	0.467336	5.37686	7.57974e-08	1.38999e-06
SYK	2133.14	-1.19599	0.222478	-5.37578	7.62515e-08	1.39712e-06
PRPF39	326.01	1.13844	0.211805	5.37494	7.66094e-08	1.40248e-06
NKAPP1	31.2247	1.75167	0.326072	5.37203	7.78535e-08	1.42403e-06
SH3BP1	78.2765	-1.70722	0.317964	-5.36923	7.90739e-08	1.44389e-06
SSBP2	801.288	1.89659	0.35329	5.36835	7.946e-08	1.44971e-06
PSTPIP1	307.31	-2.72592	0.507978	-5.36621	8.04082e-08	1.46576e-06
S1PR3	74.0995	-5.19639	0.968545	-5.36515	8.08811e-08	1.47312e-06
BDH2	91.8436	1.34186	0.250124	5.36478	8.10496e-08	1.4742e-06
ZNF492	8.00649	5.36482	1.00002	5.36471	8.1078e-08	1.4742e-06
CCRL2	251.492	-2.90101	0.540785	-5.36445	8.1198e-08	1.47513e-06
RP1.111C20.4	64.7903	-1.8171	0.338773	-5.36376	8.15083e-08	1.47951e-06
AP001171.1	38.0273	6.3178	1.17844	5.36115	8.26943e-08	1.49977e-06
NFKBIA	12403.3	-2.03403	0.379546	-5.35912	8.36261e-08	1.51539e-06
CASP2	819.742	1.44541	0.269928	5.3548	8.56507e-08	1.55076e-06
ZFP28	33.9777	2.61861	0.489162	5.35326	8.63847e-08	1.56273e-06
VPREB1	53.2541	8.73675	1.6323	5.35242	8.67851e-08	1.56865e-06
ELOVL6	53.8981	4.67259	0.873155	5.35139	8.72795e-08	1.57626e-06
VDR	138.985	-3.84689	0.7189	-5.35108	8.743e-08	1.57721e-06
DUT	736.172	1.55255	0.290143	5.35098	8.74798e-08	1.57721e-06
SCLT1	206.908	-1.2046	0.225146	-5.35028	8.78203e-08	1.58202e-06
RNF130	2292.72	-1.47366	0.275449	-5.35002	8.79466e-08	1.58296e-06
CCDC176	8.66543	3.4018	0.635929	5.34933	8.82781e-08	1.5876e-06
ANKRD54	256.169	1.25963	0.235484	5.34912	8.83839e-08	1.58817e-06
RP1.39G22.7	66.0903	1.61777	0.302449	5.34889	8.8493e-08	1.58879e-06
TRBV27	39.3421	5.58619	1.04446	5.34842	8.87257e-08	1.59164e-06
AZI2	218.57	-1.15826	0.216609	-5.34722	8.93153e-08	1.60087e-06
ENTPD1	300.044	-2.45394	0.459469	-5.34083	9.25237e-08	1.65699e-06
PRIM1	161.522	2.05043	0.383928	5.34068	9.26007e-08	1.65699e-06
TSC22D1	2512.93	2.68412	0.502781	5.33854	9.36978e-08	1.67522e-06
IGHJ2P	10.7705	6.21498	1.16483	5.33553	9.52677e-08	1.70187e-06
PPAT	133.294	2.0864	0.391074	5.33506	9.55145e-08	1.70485e-06
STX10	456.226	-1.10317	0.206845	-5.33331	9.64388e-08	1.71992e-06
AC079325.6	59.5785	-5.50544	1.03244	-5.33247	9.68847e-08	1.72643e-06
FKBP7	45.483	2.45372	0.460227	5.33155	9.73787e-08	1.73379e-06
ZEB2	2750.16	-1.17123	0.219712	-5.33074	9.78159e-08	1.74013e-06
ZNF33B.1	122.16	2.52854	0.474371	5.3303	9.80487e-08	1.74283e-06
FUCA1	414.234	-2.57838	0.483772	-5.32975	9.83502e-08	1.74674e-06
RP1.90J20.12	52.696	-2.53423	0.47591	-5.32502	1.0094e-07	1.79125e-06
AC008984.2	7.5166	-6.41424	1.20521	-5.32209	1.02579e-07	1.81883e-06
RP11.351D16.3	17.1908	-2.29944	0.432117	-5.32133	1.03011e-07	1.82498e-06
MCM3AP.AS1	30.9177	2.73004	0.5131	5.32068	1.03379e-07	1.82998e-06
TRIM11	181.023	-1.93846	0.364685	-5.31544	1.06401e-07	1.88037e-06
FOSB	6388.59	-1.7342	0.32641	-5.31295	1.07863e-07	1.90463e-06
CNRIP1	63.4543	5.74691	1.08181	5.31233	1.08233e-07	1.90801e-06
RNASEK	102.509	-1.79137	0.337203	-5.31245	1.08162e-07	1.90801e-06
C4orf48	36.3944	-2.25166	0.423921	-5.3115	1.08724e-07	1.9151e-06
ZEB1	146.994	4.24813	0.799944	5.31053	1.09307e-07	1.92378e-06
TNFAIP6	201.845	-4.23084	0.797034	-5.30822	1.10698e-07	1.94667e-06
PDCD11	207.133	1.34325	0.25322	5.30467	1.12879e-07	1.98339e-06
RAB5C	437.111	-1.36756	0.257831	-5.30409	1.13238e-07	1.98807e-06
DKC1	600.391	1.40791	0.265462	5.30363	1.1352e-07	1.9914e-06
RAP2B	1221.18	-1.56785	0.295627	-5.30348	1.13617e-07	1.99147e-06
STX18.AS1	11.4566	3.03552	0.57249	5.30231	1.14344e-07	2.00093e-06
QKI	317.636	-1.19435	0.22525	-5.30233	1.14332e-07	2.00093e-06
FAM124B	139.416	1.86862	0.35244	5.30195	1.14572e-07	2.00328e-06
RCL1	221.003	1.47128	0.277651	5.29902	1.16423e-07	2.03233e-06
WT1.AS	27.4896	6.74125	1.27242	5.29797	1.17098e-07	2.04079e-06
HCK	1751.96	-3.96903	0.749149	-5.29805	1.17044e-07	2.04079e-06
ZNF107	126.002	1.83318	0.346214	5.29494	1.19058e-07	2.07326e-06
DIMT1	303.931	1.23755	0.233783	5.29357	1.19952e-07	2.08712e-06
MS4A6A	2871.1	-4.3152	0.815439	-5.29187	1.21073e-07	2.10493e-06
ZMYM3	173.713	1.39103	0.262888	5.29134	1.21421e-07	2.10926e-06
IQGAP1	2101.24	-1.94106	0.367209	-5.28598	1.25035e-07	2.17028e-06
NLRP3	1229.71	-2.36547	0.447671	-5.28395	1.26425e-07	2.19263e-06
ACYP1	89.5529	1.90166	0.360106	5.28083	1.28597e-07	2.2285e-06
BTG1	2303.98	-2.49428	0.472345	-5.28064	1.28732e-07	2.22903e-06
PRELID2	114.028	2.9408	0.557076	5.279	1.29891e-07	2.24728e-06
NHLRC2	213.566	1.312	0.248625	5.27704	1.31287e-07	2.26961e-06
RP1.229K20.5	3.22293	-5.39551	1.02283	-5.27508	1.32696e-07	2.2921e-06
F2R	297.668	4.39222	0.832716	5.27457	1.3307e-07	2.29672e-06
ALDH2	546.904	-2.95158	0.559821	-5.27237	1.34673e-07	2.32251e-06
TAGAP	2071.05	-2.08157	0.394881	-5.2714	1.35388e-07	2.33296e-06
RAB39A	11.949	-6.04856	1.14821	-5.2678	1.38067e-07	2.37722e-06
AC021016.6	3.25455	-3.60422	0.68424	-5.26748	1.38311e-07	2.3776e-06
ZNRF1	47.0263	1.93957	0.368212	5.26752	1.38282e-07	2.3776e-06
TNF	1110.92	-4.32002	0.820506	-5.26507	1.40139e-07	2.40708e-06
CRK	316.081	-1.0999	0.209021	-5.26217	1.42364e-07	2.44139e-06
METTL3	423.453	1.15642	0.219824	5.26064	1.43555e-07	2.45984e-06
SRGAP2C	11.0156	-2.34928	0.446625	-5.26008	1.43994e-07	2.4654e-06
BCL6	1384.09	-3.60258	0.684949	-5.25964	1.44341e-07	2.46779e-06
SPPL2B	334.425	1.33015	0.2529	5.25961	1.44364e-07	2.46779e-06
IRGM	28.2817	4.80002	0.913113	5.25676	1.46616e-07	2.50429e-06
TET2	893.478	-1.31478	0.250123	-5.25652	1.4681e-07	2.5056e-06
C14orf182	29.6505	-3.308	0.629416	-5.25567	1.47487e-07	2.51515e-06
MAN2B1	1067.27	-1.82882	0.348002	-5.25519	1.47873e-07	2.51972e-06
AE000661.50	8.15954	7.00544	1.33319	5.25464	1.48313e-07	2.52522e-06
FYB	1217.31	-2.44368	0.465206	-5.2529	1.49726e-07	2.54523e-06
ABHD17B	405.2	2.30286	0.438385	5.25304	1.49608e-07	2.54523e-06
CCDC66	141.371	1.38377	0.263487	5.25177	1.50648e-07	2.55684e-06
PRMT1	735.1	1.27708	0.243171	5.25179	1.50629e-07	2.55684e-06
CTD.2514K5.2	11.8829	-4.26516	0.812397	-5.25009	1.52021e-07	2.5781e-06
CES1	183.82	-6.94638	1.32344	-5.24874	1.53142e-07	2.59506e-06
DENND1A	461.959	-1.49998	0.285818	-5.24802	1.53745e-07	2.60119e-06
RP11.89K11.1	9.66868	3.44073	0.655624	5.24801	1.53747e-07	2.60119e-06
GFI1B	225.848	5.10529	0.973025	5.24682	1.54745e-07	2.61601e-06
KIAA1586	134.442	1.64124	0.312953	5.24437	1.56816e-07	2.64893e-06
FAM84B	38.1147	4.82531	0.920184	5.24385	1.57261e-07	2.65434e-06
ARPC1B	2472.46	-1.62109	0.309213	-5.24264	1.58294e-07	2.66969e-06
CCND2	1090.85	2.34937	0.448176	5.24206	1.58794e-07	2.67601e-06
FCGR2B	90.7712	-5.10399	0.973954	-5.24049	1.60153e-07	2.69468e-06
NAPA	706.432	-1.52226	0.290523	-5.23973	1.60813e-07	2.70366e-06
LCP2	1083.15	-1.80996	0.34554	-5.23806	1.62276e-07	2.72397e-06
NCOR2	111.9	-1.86997	0.357014	-5.2378	1.62506e-07	2.7257e-06
TWF2	128.184	-1.37625	0.262813	-5.23662	1.63544e-07	2.74096e-06
TRIM7	16.7336	-6.05909	1.15744	-5.23492	1.65058e-07	2.76417e-06
FCGR1C	7.28575	-5.8118	1.11026	-5.23463	1.65312e-07	2.76627e-06
RP1.257A7.4	58.3764	-2.33697	0.446472	-5.23431	1.65605e-07	2.769e-06
NDUFS7	272.159	-1.07296	0.205049	-5.23271	1.67045e-07	2.7909e-06
SCCPDH	824.23	1.25222	0.239348	5.23181	1.67855e-07	2.80224e-06
CREBZF	148.313	1.21539	0.23238	5.23019	1.69334e-07	2.82474e-06
ZSWIM4	40.471	-1.82866	0.349713	-5.22904	1.70389e-07	2.84012e-06
CYBA	2421.82	-1.72847	0.330567	-5.2288	1.70615e-07	2.84168e-06
HEATR3	105.024	-1.51529	0.289862	-5.2276	1.71721e-07	2.85789e-06
RAB37	1073.46	1.46921	0.281149	5.22571	1.73486e-07	2.88501e-06
SV2A	101.034	3.62531	0.69395	5.22417	1.7494e-07	2.90469e-06
IGLL1	176.206	6.01222	1.15139	5.22171	1.77275e-07	2.94118e-06
FAM46C	237.469	3.61724	0.692875	5.22062	1.78321e-07	2.95559e-06
IPCEF1	82.7748	-4.37186	0.837438	-5.22052	1.7842e-07	2.95559e-06
ANKRD44	496.813	-1.69066	0.323886	-5.21992	1.78997e-07	2.96285e-06
CCDC88B	329.759	-2.37701	0.455453	-5.21901	1.79878e-07	2.97514e-06
AC006129.2	175.264	3.48058	0.667042	5.21794	1.80928e-07	2.9902e-06
MATK	102.363	3.23773	0.620842	5.21506	1.83753e-07	3.03455e-06
ADAMTS1	66.111	20.0551	3.84665	5.21365	1.85164e-07	3.05549e-06
LAMB3	15.0484	-5.21567	1.00045	-5.21334	1.85467e-07	3.05814e-06
TNFAIP3	3425.39	-2.67394	0.513024	-5.21212	1.86698e-07	3.07606e-06
CHST2	56.7473	-3.83928	0.73681	-5.21068	1.88149e-07	3.09759e-06
RP11.47A8.5	27.8884	-2.26388	0.434483	-5.2105	1.88333e-07	3.09824e-06
IGFLR1	13.8445	-2.16013	0.414716	-5.20871	1.90155e-07	3.12342e-06
AF213884.2	36.1752	-2.66147	0.511233	-5.20598	1.92972e-07	3.16725e-06
PGAP2	145.996	1.03221	0.198304	5.20518	1.93809e-07	3.17856e-06
CD59	464.236	2.87107	0.551651	5.20451	1.94511e-07	3.18762e-06
NFKBIE	417.798	-2.2531	0.433071	-5.20261	1.96505e-07	3.21784e-06
ZDHHC9	130.633	1.62189	0.31187	5.20051	1.98738e-07	3.25192e-06
NOP56	807.627	1.24975	0.240319	5.20036	1.98902e-07	3.25212e-06
LARS2	112.188	1.45595	0.280026	5.19935	1.99987e-07	3.26488e-06
TUBB	1646.84	1.64388	0.316162	5.19948	1.99846e-07	3.26488e-06
AGK	203.866	1.19962	0.230841	5.19676	2.02795e-07	3.3082e-06
LRPAP1	1184.14	-1.68453	0.324267	-5.1949	2.04833e-07	3.3389e-06
INPP4B	142.012	4.39266	0.845656	5.19437	2.0541e-07	3.34577e-06
DBNL	1211.96	-1.33259	0.256625	-5.19275	2.07205e-07	3.37244e-06
WDHD1	102.644	2.88176	0.554998	5.19237	2.0763e-07	3.37678e-06
CTSW	521.017	3.50944	0.675926	5.19204	2.08001e-07	3.38026e-06
RP5.1092A3.4	23.3431	2.68374	0.516922	5.19177	2.08301e-07	3.38256e-06
AC034193.5	28.4236	2.40005	0.462347	5.19102	2.09142e-07	3.39364e-06
RP11.25K19.1	100.131	3.28628	0.633244	5.18959	2.10756e-07	3.41467e-06
CTC.359D24.3	8.00881	3.48477	0.671482	5.18967	2.10671e-07	3.41467e-06
TMEM44	28.6061	2.89769	0.558646	5.18698	2.13726e-07	3.45944e-06
GCAT	59.9239	2.89374	0.557895	5.18688	2.13843e-07	3.45944e-06
NAA35	207.326	1.13057	0.21798	5.18659	2.1418e-07	3.46227e-06
MIR4530	3.39091	-4.35679	0.84048	-5.18369	2.17534e-07	3.51385e-06
INPP5K	336.848	-1.01514	0.19585	-5.18324	2.18061e-07	3.5197e-06
ACTR3C	15.9483	1.94001	0.374356	5.18226	2.19217e-07	3.5357e-06
MYCT1	35.6155	8.01649	1.54723	5.1812	2.20469e-07	3.55321e-06
FOLR2	62.9586	-4.90644	0.947575	-5.17789	2.24413e-07	3.61134e-06
ZNF566	66.007	2.24403	0.433385	5.17791	2.24382e-07	3.61134e-06
KMO	43.3814	-3.71025	0.717171	-5.17345	2.29808e-07	3.69539e-06
ZNF257	30.101	4.6598	0.900841	5.17272	2.3071e-07	3.70712e-06
TRIM38	561.496	-1.26511	0.244596	-5.17225	2.31289e-07	3.71362e-06
KHDC1	20.0722	3.92735	0.759369	5.17186	2.31772e-07	3.7186e-06
NPM1	1746.18	1.37215	0.265558	5.16703	2.37842e-07	3.81027e-06
AUTS2	28.7101	3.58454	0.69373	5.16705	2.37817e-07	3.81027e-06
HTRA2	98.0758	1.09337	0.21162	5.16666	2.38314e-07	3.81499e-06
RP11.1319K7.1	6.82119	-2.84073	0.549893	-5.16597	2.39196e-07	3.82376e-06
C20orf96	133.027	1.70339	0.329734	5.16595	2.39219e-07	3.82376e-06
UMODL1	63.0148	5.77862	1.1187	5.16545	2.39857e-07	3.83109e-06
APEX1	1009.52	1.30818	0.253277	5.16501	2.4043e-07	3.83738e-06
ZDHHC3	380.146	-1.08772	0.210621	-5.16432	2.41314e-07	3.84862e-06
TMEM38A	23.658	-4.58947	0.888786	-5.16376	2.42042e-07	3.85737e-06
CDKN1A	2720.34	-3.22898	0.6254	-5.16306	2.42945e-07	3.86887e-06
SAAL1	133.691	1.17752	0.228081	5.16274	2.43364e-07	3.87267e-06
ZRANB2	844.055	1.03941	0.201349	5.16223	2.44028e-07	3.87748e-06
TPP1	4384.76	-1.28778	0.249461	-5.16224	2.44015e-07	3.87748e-06
MFSD7	43.0547	-3.62138	0.701562	-5.16189	2.44474e-07	3.88168e-06
RP11.728F11.4	3.77496	-6.07214	1.17753	-5.15667	2.51385e-07	3.98846e-06
FN1	61.5053	-4.13165	0.801356	-5.15581	2.52531e-07	3.99412e-06
RP11.67L2.2	29.6525	-2.29068	0.4443	-5.15571	2.52674e-07	3.99412e-06
MDC1	110.308	1.23783	0.240074	5.15602	2.52251e-07	3.99412e-06
ALKBH2	59.6578	1.75462	0.340314	5.15587	2.52455e-07	3.99412e-06
TCEAL1	91.4442	1.6899	0.327743	5.15616	2.52065e-07	3.99412e-06
GIMAP4	264.281	-5.98505	1.16096	-5.15528	2.53255e-07	4.00035e-06
CD53	3134.64	-1.86773	0.362394	-5.15387	2.55162e-07	4.02674e-06
HBD	209.96	7.70246	1.49453	5.15377	2.55302e-07	4.02674e-06
AC015871.1	6.85598	-6.19233	1.20196	-5.15184	2.57938e-07	4.06532e-06
EMP3	2591.15	-1.77829	0.345359	-5.1491	2.61735e-07	4.12214e-06
SLC26A6	218.134	-1.7148	0.333093	-5.14813	2.63094e-07	4.14049e-06
SPNS1	16.0105	-1.96204	0.381234	-5.14654	2.65333e-07	4.17266e-06
MT.TL1	115.271	-3.58998	0.697638	-5.14591	2.66227e-07	4.18366e-06
RAB20	221.782	-3.32937	0.647229	-5.14403	2.68911e-07	4.22273e-06
METTL9	1156.66	-1.22665	0.238521	-5.14272	2.70789e-07	4.2491e-06
SIGLEC22P	55.2693	-3.40478	0.662234	-5.14135	2.7277e-07	4.27705e-06
SLC23A1	20.8603	2.81727	0.548018	5.14084	2.73511e-07	4.28554e-06
IL1A	4.35326	-5.45875	1.06228	-5.1387	2.76639e-07	4.32822e-06
RAB24	104.759	-2.02876	0.394796	-5.13875	2.76577e-07	4.32822e-06
SLC35G2	45.7509	3.73526	0.727185	5.1366	2.79748e-07	4.37366e-06
PQLC3	619.138	-1.49352	0.290769	-5.13646	2.79958e-07	4.37375e-06
JHDM1D	194.231	-3.03331	0.590577	-5.13618	2.80383e-07	4.37402e-06
CTA.384D8.35	11.67	-4.60094	0.895788	-5.13619	2.80358e-07	4.37402e-06
EAF1	479.509	-1.92474	0.374766	-5.13583	2.80897e-07	4.37884e-06
C21orf58	47.16	2.52189	0.491145	5.13471	2.82587e-07	4.39878e-06
GDI1	581.592	-1.28367	0.250019	-5.13429	2.83219e-07	4.40542e-06
ZNF792	96.6768	2.78688	0.542915	5.13318	2.84881e-07	4.42805e-06
IGHD	77.4635	6.68249	1.30229	5.13134	2.87694e-07	4.46853e-06
SUGT1P	8.89298	3.54895	0.691739	5.13047	2.89018e-07	4.48586e-06
OGFOD1	261.314	1.50538	0.293447	5.12999	2.89763e-07	4.49416e-06
KDM1B	294.328	-1.63957	0.319619	-5.12975	2.9012e-07	4.49644e-06
SCPEP1	2000.99	-3.21296	0.626393	-5.1293	2.90822e-07	4.5008e-06
TRIB1	1709.57	-2.488	0.485122	-5.1286	2.91907e-07	4.51434e-06
APITD1	15.8616	2.19267	0.427889	5.1244	2.98486e-07	4.61274e-06
TRMT11	99.3994	1.69219	0.330323	5.12283	3.0099e-07	4.64809e-06
BCL3	89.5719	-2.47205	0.482696	-5.12135	3.03355e-07	4.68124e-06
CAMKK1	87.4566	-2.54173	0.496317	-5.12117	3.03639e-07	4.68226e-06
TMEM88	10.5589	-3.49195	0.682206	-5.11861	3.0779e-07	4.73944e-06
TMEM41A	169.642	1.1645	0.227683	5.11454	3.14511e-07	4.83945e-06
DUSP14	110.063	2.0838	0.407667	5.11153	3.19558e-07	4.91358e-06
AC103828.1	4.86437	-4.746	0.928647	-5.11066	3.21034e-07	4.93273e-06
CSTF2T	206.71	1.36033	0.266223	5.10972	3.2263e-07	4.95243e-06
C12orf79	13.9392	-4.1282	0.807924	-5.10964	3.22778e-07	4.95243e-06
ZNF542	41.736	2.47327	0.484316	5.10672	3.27794e-07	5.02578e-06
IFT81	55.5048	2.79259	0.546881	5.10639	3.28368e-07	5.03022e-06
TP53INP2	133.043	-3.12803	0.612584	-5.10629	3.28553e-07	5.03022e-06
SMYD3	261.024	2.26629	0.44388	5.10562	3.29707e-07	5.04428e-06
SMIM8	65.2968	1.46237	0.286456	5.10504	3.30725e-07	5.05624e-06
AC096579.7	18.012	6.4975	1.27318	5.10338	3.3364e-07	5.09718e-06
MAGED1	430.522	2.17809	0.426912	5.10196	3.36158e-07	5.13197e-06
CEP41	162.888	2.10577	0.412781	5.10141	3.37126e-07	5.14309e-06
EHD2	127.757	5.09345	0.99897	5.0987	3.41986e-07	5.21352e-06
RP11.77P16.4	9.50707	3.6777	0.72133	5.09849	3.42373e-07	5.21571e-06
PLB1	146.976	-1.86302	0.365534	-5.09672	3.45595e-07	5.26105e-06
PLEKHM1P	380.448	-1.2553	0.246313	-5.09635	3.46256e-07	5.26737e-06
SPINK2	724.464	5.4136	1.06253	5.09503	3.48692e-07	5.2969e-06
BLMH	245.568	1.45151	0.28491	5.09464	3.49404e-07	5.30395e-06
KCNK17	68.2939	5.15681	1.01252	5.09305	3.52348e-07	5.34486e-06
COQ10A	44.8787	2.41402	0.47412	5.09158	3.55085e-07	5.38257e-06
MEGF6	107.555	2.21899	0.436131	5.08789	3.62068e-07	5.48454e-06
ZNF3	350.936	1.18698	0.233319	5.08737	3.63068e-07	5.48804e-06
GNPNAT1	71.701	1.78767	0.351392	5.08739	3.63023e-07	5.48804e-06
DHCR7	192.26	2.47625	0.486762	5.08719	3.63406e-07	5.48928e-06
FAHD2B	27.2044	3.01366	0.592636	5.08518	3.67273e-07	5.54378e-06
PRKAG2	258.335	-1.7833	0.350722	-5.08464	3.68323e-07	5.55571e-06
MYCN	27.085	6.93304	1.36372	5.08392	3.69729e-07	5.573e-06
POLR3G	17.34	2.62847	0.517341	5.08074	3.75966e-07	5.66302e-06
RP11.497H16.2	6.59182	-5.62736	1.10842	-5.07693	3.8358e-07	5.77365e-06
VMP1	2406.43	-1.5536	0.306113	-5.07525	3.86992e-07	5.82091e-06
OSM	829.416	-2.58053	0.508932	-5.07048	3.96805e-07	5.96432e-06
BYSL	92.3707	2.26518	0.446851	5.0692	3.99484e-07	6.00038e-06
FANCL	116.297	1.66678	0.328861	5.06835	4.01274e-07	6.01967e-06
GTF2I	212.761	1.28801	0.25413	5.06833	4.0133e-07	6.01967e-06
ZNF568	58.4696	2.04898	0.404748	5.06235	4.14129e-07	6.2073e-06
CDCA7	515.284	3.50556	0.692634	5.0612	4.16631e-07	6.24044e-06
CD200	243.881	5.31429	1.05047	5.05895	4.21564e-07	6.30991e-06
NAIP	86.6275	-3.20977	0.63452	-5.05857	4.22402e-07	6.31803e-06
RP11.295G20.2	39.1484	-2.21993	0.438861	-5.05839	4.22817e-07	6.31982e-06
ATP2C1	678.585	1.02756	0.203202	5.05683	4.26277e-07	6.36104e-06
METTL10	71.1638	1.01994	0.201699	5.05675	4.26465e-07	6.36104e-06
ATAD5	132.361	1.85483	0.366797	5.05684	4.26263e-07	6.36104e-06
LINC00346	5.60827	-6.6983	1.32513	-5.05484	4.30751e-07	6.4205e-06
TBC1D22A	255.458	-1.03695	0.205177	-5.05391	4.3286e-07	6.44745e-06
MTHFD2L	221.481	1.31303	0.260027	5.04959	4.42762e-07	6.59035e-06
ZNF195	225.712	1.1414	0.226127	5.04761	4.47367e-07	6.65427e-06
CATSPER1	40.8627	-3.42586	0.678767	-5.04718	4.48376e-07	6.66465e-06
REXO2	204.522	2.62518	0.520153	5.04694	4.48935e-07	6.66834e-06
TCEAL4	230.4	1.43971	0.285275	5.04675	4.49396e-07	6.67056e-06
CD1A	8.99615	-6.98431	1.38411	-5.04605	4.51028e-07	6.68889e-06
RP3.510H16.3	12.4428	-3.60232	0.713902	-5.04596	4.51256e-07	6.68889e-06
SMPDL3B	34.0962	2.9759	0.589952	5.04431	4.55172e-07	6.73762e-06
DTX2	72.7115	-1.41061	0.279961	-5.03861	4.68937e-07	6.93657e-06
TOPORS	518.376	1.45266	0.288319	5.03836	4.69531e-07	6.94057e-06
HERC2P9	59.6369	1.7196	0.341392	5.03701	4.72849e-07	6.9848e-06
FAM216A	142.905	2.43886	0.484347	5.03536	4.76943e-07	7.04041e-06
PFKFB4	144.444	-2.5449	0.505531	-5.03412	4.80049e-07	7.0794e-06
ZNF346	132.258	1.28848	0.255973	5.03367	4.81183e-07	7.08348e-06
TSR1	264.642	1.24469	0.24727	5.03372	4.81056e-07	7.08348e-06
CH25H	34.3595	-7.56362	1.50281	-5.03298	4.82924e-07	7.10422e-06
PLIN5	15.6722	-5.40759	1.07454	-5.03244	4.84264e-07	7.11905e-06
CORO1A	2729.41	-1.74585	0.347048	-5.03058	4.89e-07	7.18374e-06
RP11.343N15.5	47.301	-2.09813	0.417126	-5.02998	4.9054e-07	7.20142e-06
NEU1	1298.87	-1.68618	0.335247	-5.02968	4.91303e-07	7.20768e-06
ROBO4	36.3713	5.52514	1.0986	5.02925	4.92393e-07	7.21873e-06
FAM212B	85.3366	-2.23878	0.445204	-5.02866	4.9392e-07	7.23617e-06
PITPNA	110.38	-1.53077	0.304443	-5.02811	4.95349e-07	7.25214e-06
ACAP2	749.114	-1.00956	0.200831	-5.02689	4.98504e-07	7.28836e-06
DLEU7	11.7137	-5.12043	1.0186	-5.02691	4.9845e-07	7.28836e-06
SASH1	30.0301	-8.06699	1.60492	-5.02641	4.99743e-07	7.3015e-06
RAD18	145.683	1.41629	0.281872	5.02457	5.04568e-07	7.36696e-06
ZNF285	21.6246	6.03511	1.20162	5.02247	5.10104e-07	7.44272e-06
CARD11	60.3047	4.71434	0.939086	5.02014	5.16347e-07	7.52868e-06
GSTK1	1907.23	-1.13378	0.225876	-5.01948	5.18104e-07	7.54917e-06
EVI2A	203.704	-1.64025	0.326814	-5.0189	5.19677e-07	7.56693e-06
STAT6	1678.13	-1.25318	0.249744	-5.01788	5.22449e-07	7.60213e-06
IL17RA	990.721	-2.66862	0.531877	-5.01735	5.2389e-07	7.61793e-06
KIAA0020	297.329	1.33001	0.265204	5.01506	5.30165e-07	7.70394e-06
LL22NC03.N27C7.1	4.46276	4.08697	0.814998	5.0147	5.31154e-07	7.71308e-06
ZNF793	19.9526	5.81611	1.15991	5.01429	5.32295e-07	7.72442e-06
PSD	17.0928	-2.02235	0.403363	-5.01372	5.33874e-07	7.74208e-06
SIRPB2	457.202	-4.07272	0.812346	-5.01353	5.34413e-07	7.74465e-06
CAPNS1	791.24	-1.51812	0.302911	-5.01175	5.39367e-07	7.80588e-06
PTGER2	1502.14	-2.02129	0.403363	-5.0111	5.41187e-07	7.82693e-06
VPS18	296.986	-1.35772	0.270949	-5.01097	5.4156e-07	7.82705e-06
LL22NC03.2H8.5	59.4168	2.26642	0.452408	5.00968	5.45199e-07	7.87432e-06
GPR183	2441.07	-3.30214	0.659271	-5.00877	5.47782e-07	7.90629e-06
MDM2	572.434	-1.53759	0.307185	-5.00541	5.57435e-07	8.0402e-06
CARD14	4.35826	-5.18362	1.03568	-5.00503	5.5852e-07	8.05043e-06
MMS22L	122.625	1.31236	0.262258	5.00408	5.61306e-07	8.08515e-06
PNPLA1	10.4104	-5.07967	1.01561	-5.00162	5.68517e-07	8.18351e-06
LINC00167	12.1448	-3.55429	0.710703	-5.0011	5.70045e-07	8.2e-06
PTX3	257.998	-4.19245	0.838513	-4.99986	5.7371e-07	8.24028e-06
ZNF428	46.038	1.26566	0.253143	4.99977	5.74e-07	8.24028e-06
NAA40	141.552	1.4583	0.29177	4.99812	5.7892e-07	8.30535e-06
ZNFX1	839.452	-1.71338	0.342883	-4.99696	5.82406e-07	8.34977e-06
NIPSNAP1	144.077	1.64395	0.32922	4.99346	5.93065e-07	8.49689e-06
OGFRL1	246.373	-2.48007	0.496771	-4.99238	5.96394e-07	8.53888e-06
IMMP1L	58.3048	1.8046	0.361522	4.99167	5.98605e-07	8.5648e-06
CYB561A3	311.849	-1.20867	0.242168	-4.99104	6.00552e-07	8.58692e-06
CAHM	14.8614	-2.05899	0.412552	-4.99085	6.01147e-07	8.5897e-06
GNPTG	397.545	-1.15251	0.230938	-4.99055	6.02068e-07	8.59713e-06
MRAS	57.1088	-5.22309	1.04668	-4.99016	6.03306e-07	8.60907e-06
CACNA1C.AS1	6.74641	5.20243	1.04285	4.98866	6.07983e-07	8.67004e-06
CAPN14	7.82986	5.9666	1.19612	4.9883	6.09139e-07	8.67497e-06
CHFR	335.216	-1.0396	0.208419	-4.98801	6.10031e-07	8.6819e-06
TET3	112.456	-1.41065	0.282858	-4.98711	6.12893e-07	8.71684e-06
RP11.134P9.3	17.6383	-3.80708	0.763533	-4.98613	6.15995e-07	8.75475e-06
PTPRJ	100.322	-4.0242	0.807098	-4.98601	6.16376e-07	8.75475e-06
KB.1471A8.1	7.09686	4.2357	0.850177	4.98215	6.28829e-07	8.92571e-06
AOAH.IT1	6.30377	-3.88793	0.780543	-4.98106	6.32371e-07	8.97004e-06
KMT2A	420.764	1.34705	0.270471	4.9804	6.3452e-07	8.99457e-06
NVL	170.284	1.08046	0.216964	4.97992	6.36102e-07	9.01103e-06
CDC42EP2	75.6864	-2.83209	0.568758	-4.97942	6.37735e-07	9.02819e-06
RP4.673M15.1	26.5071	-2.733	0.549053	-4.97766	6.43565e-07	9.1047e-06
GNB2	544.783	-2.0112	0.404423	-4.97301	6.59214e-07	9.31994e-06
OSTF1	888.665	-1.54335	0.310373	-4.97257	6.60716e-07	9.33501e-06
TAX1BP3	21.6722	-1.57533	0.316827	-4.97222	6.61907e-07	9.34568e-06
CALM1	2768.14	-1.00886	0.202939	-4.97123	6.65279e-07	9.38709e-06
TCEB2	613.345	-1.3933	0.280335	-4.97012	6.69127e-07	9.42896e-06
GPR114	264.126	3.04159	0.611965	4.97021	6.6882e-07	9.42896e-06
KIAA0391.1	3.04616	4.30678	0.866632	4.96956	6.71036e-07	9.44965e-06
WDR62	44.3308	2.20031	0.442873	4.96826	6.75576e-07	9.50109e-06
FBXW4P1	9.85601	3.24531	0.65427	4.9602	7.04223e-07	9.8845e-06
RP11.519G16.3	3.08771	-5.94844	1.19979	-4.95789	7.1264e-07	9.9961e-06
FRAT2	24.9949	-1.68523	0.33993	-4.95756	7.13823e-07	1.00061e-05
RP13.452N2.1	11.9315	-4.13476	0.834156	-4.95682	7.1658e-07	1.00382e-05
CSTF1	153.906	1.25391	0.253057	4.95503	7.23174e-07	1.0124e-05
ZNF671	127.583	1.73122	0.349522	4.95309	7.30444e-07	1.02191e-05
ANAPC7	221.496	1.31142	0.264876	4.95107	7.38071e-07	1.0319e-05
RP11.701P16.4	3.56449	-5.97874	1.20772	-4.95043	7.40483e-07	1.0346e-05
PLOD1	360.099	-1.91507	0.38688	-4.95003	7.4201e-07	1.03606e-05
FAHD2A	83.3805	1.23054	0.248646	4.94897	7.46074e-07	1.0401e-05
DBN1	132.149	2.87974	0.581896	4.94889	7.46366e-07	1.0401e-05
DNAJC1	412.746	1.73181	0.349923	4.94912	7.45486e-07	1.0401e-05
ZNF84	15.8648	1.61925	0.327272	4.94771	7.50899e-07	1.04574e-05
QSOX1	642.613	-1.66113	0.33578	-4.94707	7.53376e-07	1.04851e-05
ZNF544	95.0937	2.34909	0.474876	4.94674	7.54658e-07	1.04961e-05
RP11.169D4.1	2.66447	-6.52293	1.31888	-4.94582	7.58259e-07	1.05394e-05
RP11.589N15.2	5.94313	-4.09956	0.828981	-4.9453	7.60249e-07	1.05602e-05
ZNF852	54.3577	1.69545	0.34296	4.94357	7.67066e-07	1.0648e-05
ADAT2	93.7377	1.74952	0.353933	4.94308	7.68986e-07	1.06677e-05
RP13.476E20.1	2.44498	4.69207	0.94925	4.94292	7.69614e-07	1.06681e-05
RP11.242D8.1	17.7795	1.6593	0.3357	4.94282	7.70014e-07	1.06681e-05
GPX3	45.6123	-4.15621	0.841101	-4.94139	7.75674e-07	1.07396e-05
CRISPLD1	92.3014	4.68002	0.947459	4.93955	7.83016e-07	1.08343e-05
CRISPLD2	231.185	-4.44814	0.900623	-4.93897	7.85382e-07	1.086e-05
TEX30	228.879	2.04523	0.414211	4.93767	7.90626e-07	1.09254e-05
TNFSF4	102.378	2.95199	0.597912	4.93716	7.92678e-07	1.09467e-05
CFD	2516.95	-3.68525	0.746492	-4.93676	7.94295e-07	1.09549e-05
RGS19	758.093	-1.83285	0.371264	-4.93677	7.94262e-07	1.09549e-05
TLDC2	11.9211	-2.68672	0.544269	-4.93638	7.95852e-07	1.09693e-05
C12orf66	95.2557	1.77926	0.36049	4.93567	7.98779e-07	1.10026e-05
VAMP3	762.464	-1.39822	0.283337	-4.93482	8.02235e-07	1.1036e-05
TBL1X	101.552	-2.23937	0.453817	-4.93452	8.03486e-07	1.10461e-05
S100A10	3810.51	-2.83533	0.574791	-4.93281	8.10562e-07	1.11363e-05
RP11.745A24.1	8.25107	-2.91215	0.59048	-4.93183	8.14612e-07	1.11847e-05
NDST1	334.32	-1.95546	0.396587	-4.93073	8.19249e-07	1.12412e-05
TNIP2	280.947	-1.32298	0.268331	-4.93042	8.20513e-07	1.12513e-05
GUSBP1	33.405	1.45364	0.294886	4.9295	8.24397e-07	1.12974e-05
TPCN2	273.202	-1.0972	0.222696	-4.92688	8.35511e-07	1.14423e-05
YEATS4	166.348	1.79233	0.363833	4.92624	8.38252e-07	1.14725e-05
ZFHX3	110.536	-2.64558	0.537096	-4.92572	8.40494e-07	1.14959e-05
ZCCHC18	9.90837	6.07047	1.23314	4.92277	8.5327e-07	1.16632e-05
FCGR3B	34.0172	-7.44598	1.51266	-4.92243	8.54756e-07	1.1676e-05
FOSL2	1515.83	-2.24067	0.455249	-4.92185	8.57307e-07	1.17034e-05
IL1R2	123.671	-5.38022	1.09334	-4.92088	8.61544e-07	1.17538e-05
PPT1	3529.44	-1.49107	0.303161	-4.91843	8.72425e-07	1.18946e-05
PEBP1	1278.1	1.35887	0.276323	4.9177	8.75685e-07	1.19315e-05
TRMT13	94.3312	1.63049	0.331573	4.91744	8.76818e-07	1.19393e-05
LIMD2	926.385	-1.2439	0.252981	-4.91696	8.78981e-07	1.19612e-05
GABARAPL1	838.611	-2.57766	0.524415	-4.9153	8.86464e-07	1.20554e-05
WLS	11.7181	-7.01576	1.42771	-4.91401	8.92337e-07	1.21275e-05
ATIC	443.895	1.49412	0.304179	4.91197	9.01638e-07	1.22462e-05
RHPN1	209.781	3.05835	0.622805	4.9106	9.07967e-07	1.23165e-05
TRIM25	386.753	-1.46415	0.298174	-4.91039	9.08966e-07	1.23222e-05
MCM3	663.749	2.24571	0.457382	4.90992	9.11148e-07	1.2344e-05
NUCKS1	341.86	1.2468	0.254187	4.90503	9.34111e-07	1.26391e-05
RAPGEF1	154.872	-1.99414	0.406569	-4.90481	9.35194e-07	1.26458e-05
AC068580.5	4.92346	-5.65511	1.15348	-4.90264	9.45588e-07	1.27783e-05
CDC42EP1	46.845	-5.07302	1.03506	-4.9012	9.52511e-07	1.28637e-05
GLB1	899.275	-1.24041	0.253122	-4.90043	9.56283e-07	1.29065e-05
DCAF13	502.604	1.36126	0.277802	4.90012	9.57771e-07	1.29184e-05
SIGLEC11	7.80048	-6.46547	1.32009	-4.89776	9.69337e-07	1.30662e-05
RTKN	44.227	3.10414	0.633989	4.8962	9.77072e-07	1.31561e-05
LSM7	320.743	1.16352	0.237639	4.89617	9.77236e-07	1.31561e-05
RSPO2	5.99623	18.3455	3.74723	4.89575	9.7932e-07	1.31759e-05
MRPL16	463.871	1.38292	0.282487	4.89551	9.80496e-07	1.31835e-05
TXNDC11	498.593	-1.79833	0.367538	-4.89292	9.93487e-07	1.33496e-05
ZNF776	157.82	1.62843	0.332822	4.8928	9.94096e-07	1.33496e-05
RP11.412D9.4	5.03669	5.40668	1.10523	4.89189	9.98737e-07	1.34035e-05
C15orf39	579.706	-1.74884	0.357611	-4.89035	1.00658e-06	1.35003e-05
FFAR4	5.51478	-6.48702	1.3266	-4.88997	1.00853e-06	1.35179e-05
DLEU1	67.1783	1.70565	0.34882	4.88978	1.0095e-06	1.35181e-05
SLC27A1	119.87	-1.76303	0.360559	-4.88972	1.0098e-06	1.35181e-05
RP11.196G11.4	6.01012	-2.90151	0.593465	-4.8891	1.01299e-06	1.35523e-05
GNL3	670.981	1.27652	0.261109	4.88883	1.01436e-06	1.35621e-05
LIPA	1552.2	-1.66047	0.339709	-4.88792	1.01908e-06	1.36168e-05
TBC1D19	46.6462	2.38384	0.487732	4.88761	1.02068e-06	1.36297e-05
NARS2	180.021	1.78353	0.364989	4.88653	1.02628e-06	1.36959e-05
ACOX2	7.71952	-6.96299	1.42608	-4.88262	1.04685e-06	1.3953e-05
MAP1LC3B2	20.9026	-2.17666	0.446074	-4.87959	1.06308e-06	1.41517e-05
BCL7A	152.695	2.80639	0.575259	4.87848	1.06904e-06	1.42223e-05
ATP6V1F	879.178	-1.57034	0.321954	-4.87753	1.07423e-06	1.42824e-05
ITGA6	245.337	2.97809	0.610789	4.8758	1.08369e-06	1.43992e-05
PRKAR1B	43.1427	2.3685	0.485839	4.87507	1.0877e-06	1.44435e-05
ZNF121	397.958	1.28399	0.263445	4.87383	1.09455e-06	1.45255e-05
TFEB	151.15	-2.57775	0.528932	-4.8735	1.09639e-06	1.45386e-05
PLA2G16	31.9234	-4.70642	0.965735	-4.87341	1.0969e-06	1.45386e-05
SNORD3D	25.6341	-2.56584	0.526554	-4.87289	1.09976e-06	1.45675e-05
SYNJ1	129.722	-1.5238	0.312825	-4.87111	1.10974e-06	1.46726e-05
PDE6B	85.9682	1.91261	0.392703	4.87037	1.1139e-06	1.47094e-05
ZNF709	3.31024	4.4447	0.912594	4.8704	1.11371e-06	1.47094e-05
ZNF726	30.493	3.0625	0.629359	4.86607	1.13841e-06	1.50238e-05
ELL	295.753	-1.85253	0.381216	-4.85951	1.17675e-06	1.55202e-05
OCEL1	69.8611	-1.84227	0.379201	-4.85829	1.18403e-06	1.56066e-05
CCDC14	262.06	1.28548	0.264653	4.85724	1.19033e-06	1.568e-05
CD320	33.2289	3.62081	0.74567	4.85579	1.19909e-06	1.57857e-05
SSX2IP	207.246	1.97748	0.407438	4.85344	1.21339e-06	1.59446e-05
MSRB3	569.348	2.60319	0.536358	4.85346	1.21324e-06	1.59446e-05
ACPP	194.567	-3.21535	0.662533	-4.85311	1.2154e-06	1.59549e-05
MICU1	454.386	-1.23776	0.255047	-4.85307	1.21567e-06	1.59549e-05
NOLC1	709.304	1.28312	0.264402	4.85289	1.21672e-06	1.59589e-05
SGTB	141.075	-1.79173	0.369228	-4.85263	1.21836e-06	1.59707e-05
CLGN	13.434	5.92768	1.22181	4.85156	1.22495e-06	1.60473e-05
FKBP11	55.4509	1.86099	0.383667	4.85055	1.23118e-06	1.61091e-05
CLUHP3	22.6749	5.00442	1.03171	4.85063	1.23069e-06	1.61091e-05
RP13.580F15.2	8.61701	3.57422	0.737019	4.84957	1.23732e-06	1.61697e-05
VMO1	12.2374	-5.02536	1.03624	-4.84963	1.23694e-06	1.61697e-05
DICER1.AS1	44.7559	1.64989	0.340237	4.84923	1.23945e-06	1.61876e-05
ZNF141	84.9533	1.4259	0.294256	4.84578	1.26116e-06	1.64611e-05
FTH1P4	4.88862	-2.63884	0.54471	-4.84449	1.26935e-06	1.65579e-05
SAMSN1	900.883	-1.94001	0.400578	-4.84302	1.27879e-06	1.66709e-05
RNU6.917P	1.60211	-5.29032	1.0925	-4.8424	1.28279e-06	1.67129e-05
RP11.351I24.1	22.4832	-4.49379	0.928136	-4.84173	1.28712e-06	1.6754e-05
PTPLAD1	427.228	1.91981	0.396519	4.84167	1.28751e-06	1.6754e-05
HELLS	206.542	2.74599	0.567386	4.83972	1.3002e-06	1.69089e-05
UBE2R2	333.469	-1.4584	0.301354	-4.83949	1.3017e-06	1.69181e-05
RAD17	214.29	1.19693	0.24735	4.839	1.30492e-06	1.69497e-05
COL9A2	148.457	-3.34972	0.692423	-4.83768	1.31361e-06	1.70331e-05
COPZ2	19.9885	-5.03656	1.04109	-4.83779	1.3129e-06	1.70331e-05
RP11.15H20.6	29.5121	1.57005	0.324548	4.83767	1.31373e-06	1.70331e-05
THBS1	2264.8	-5.30304	1.09631	-4.83716	1.31706e-06	1.7066e-05
RP11.290F24.6	4.37068	-5.81341	1.20223	-4.83553	1.3279e-06	1.71857e-05
CTC.444N24.11	72.4929	1.68309	0.348126	4.83471	1.33337e-06	1.7246e-05
CSGALNACT2	1085.48	-1.56791	0.3244	-4.83326	1.34315e-06	1.73306e-05
TMEM9B	693.539	-1.03603	0.214347	-4.83342	1.34204e-06	1.73306e-05
LITAF	2451.13	-2.05674	0.425538	-4.83327	1.34311e-06	1.73306e-05
RHOQ	74.1128	-1.49193	0.30873	-4.83247	1.34851e-06	1.73893e-05
MMRN1	242.492	4.99684	1.03422	4.8315	1.35508e-06	1.74629e-05
HMHA1	1860.74	-1.36673	0.282886	-4.83139	1.35584e-06	1.74629e-05
BDH1	93.396	1.99786	0.413563	4.83084	1.35956e-06	1.75002e-05
C5orf34	22.3908	1.97657	0.409175	4.83062	1.36109e-06	1.75094e-05
PLK3	1089.4	-2.22293	0.460195	-4.8304	1.36259e-06	1.75181e-05
ITPRIPL1	12.1678	4.86352	1.00691	4.83017	1.36419e-06	1.75282e-05
SPATA2L	111.896	-1.57087	0.325245	-4.82981	1.3666e-06	1.75487e-05
SEH1L	337.619	1.02079	0.211392	4.82888	1.373e-06	1.76097e-05
TTC3	1425.98	1.47497	0.305443	4.82895	1.37252e-06	1.76097e-05
LINC00263	19.2953	3.09234	0.640431	4.82853	1.37547e-06	1.76309e-05
SLC22A18AS	4.86484	-4.33148	0.897136	-4.82812	1.37827e-06	1.76562e-05
IGLV2.11	37.3591	21.8753	4.53152	4.82736	1.38352e-06	1.77129e-05
GK.IT1	12.0808	-3.1638	0.655418	-4.82715	1.38502e-06	1.77215e-05
ADAL	48.4274	1.78476	0.369834	4.82584	1.39414e-06	1.78063e-05
PPCDC	213.091	-1.32274	0.274168	-4.82457	1.40308e-06	1.79098e-05
RRM1	405.5	1.75262	0.363331	4.82374	1.40891e-06	1.79734e-05
POLE4	279.255	-1.41558	0.293468	-4.82362	1.40977e-06	1.79737e-05
IQCC	22.438	2.01445	0.417649	4.82332	1.41189e-06	1.79901e-05
PSMC3IP	20.0068	2.05356	0.425807	4.82276	1.41587e-06	1.803e-05
NME1	195.79	1.56866	0.325311	4.82204	1.42101e-06	1.80847e-05
NPDC1	77.4398	4.20472	0.872241	4.82059	1.43131e-06	1.8205e-05
IL8	8960.98	-3.27733	0.680047	-4.81926	1.44088e-06	1.8305e-05
LYNX1	11.687	-5.42631	1.12601	-4.81906	1.44235e-06	1.83128e-05
IP6K2	756.09	1.15822	0.240372	4.81847	1.44665e-06	1.83457e-05
ADORA2A	8.72722	-3.89287	0.807903	-4.81849	1.44648e-06	1.83457e-05
ARHGAP27	627.14	-1.74653	0.362602	-4.81666	1.45979e-06	1.85013e-05
SLC36A1	125.545	-2.31765	0.481395	-4.81444	1.47615e-06	1.86976e-05
CCDC109B	403.961	-2.77353	0.576105	-4.81429	1.47725e-06	1.87005e-05
CD37	823.29	-1.15314	0.239551	-4.81377	1.4811e-06	1.87381e-05
HSPBAP1	183.414	-1.25379	0.260483	-4.81332	1.4844e-06	1.87689e-05
GALNS	190.46	-1.38099	0.286923	-4.81311	1.48599e-06	1.87778e-05
RP3.473L9.4	2.40033	-4.57038	0.949591	-4.81299	1.48687e-06	1.87778e-05
RP11.443B7.3	32.1663	-2.38676	0.49607	-4.81133	1.49931e-06	1.89238e-05
CD83	3253.07	-3.9173	0.814665	-4.80848	1.5208e-06	1.91837e-05
SGOL2	74.6525	1.84889	0.384597	4.80735	1.52941e-06	1.9281e-05
MYBPH	3.90429	-6.51153	1.35456	-4.80713	1.53115e-06	1.92916e-05
CTD.2291D10.4	6.08162	5.16071	1.07365	4.80668	1.53455e-06	1.9323e-05
COL4A3BP	622.005	-1.24842	0.259734	-4.80655	1.53555e-06	1.93243e-05
TMSB4XP8	319.767	-1.49054	0.310424	-4.80163	1.57379e-06	1.9794e-05
FGFR1OP2	693.825	1.17309	0.244368	4.80051	1.58262e-06	1.98816e-05
CDK4	317.848	1.43738	0.29944	4.80022	1.58488e-06	1.98983e-05
CCDC107	17.1394	-1.42547	0.297039	-4.79893	1.59513e-06	2.00153e-05
ATP8B2	32.8413	2.46474	0.513688	4.79812	1.60162e-06	2.00849e-05
DNAJB2	67.5094	-2.05486	0.428274	-4.798	1.60259e-06	2.00854e-05
LINC00656	3.25214	-6.3059	1.31434	-4.79777	1.60438e-06	2.00961e-05
GOLGA8B	120.388	3.2822	0.684139	4.79757	1.60601e-06	2.01047e-05
CMBL	83.1677	3.26652	0.681074	4.79614	1.61756e-06	2.02256e-05
STS	62.1904	-3.21601	0.670527	-4.79624	1.61672e-06	2.02256e-05
MYO1G	1650.63	-1.56688	0.326732	-4.79562	1.62176e-06	2.02527e-05
ZC3HAV1L	10.131	3.04054	0.634026	4.7956	1.62185e-06	2.02527e-05
AIM2	30.4724	-5.46452	1.14007	-4.79313	1.64202e-06	2.04836e-05
PUS7	105.019	2.35666	0.491742	4.79247	1.64741e-06	2.05389e-05
SEPT1	17.0543	4.02166	0.839202	4.79225	1.64924e-06	2.05498e-05
PGBD1	55.6512	2.97676	0.621201	4.79194	1.65178e-06	2.05695e-05
ALS2	172.847	1.73976	0.363119	4.79115	1.65826e-06	2.06337e-05
KDELC1	25.7825	6.29464	1.31383	4.79108	1.65886e-06	2.06337e-05
RP11.312O7.2	6.04082	-3.16903	0.66149	-4.79075	1.6616e-06	2.06557e-05
SDC3	9.45276	-4.79598	1.00129	-4.78982	1.66927e-06	2.07391e-05
RP11.288H12.4	5.20218	-6.61227	1.38071	-4.78903	1.6759e-06	2.08093e-05
AADAT	9.7412	6.05533	1.26476	4.78773	1.68677e-06	2.09321e-05
GOLPH3L	140.374	2.37482	0.496236	4.78567	1.70414e-06	2.11355e-05
FANCM	71.4507	1.42993	0.298824	4.78519	1.70829e-06	2.11747e-05
RP11.398A8.1	3.70181	-6.07717	1.27014	-4.78465	1.71282e-06	2.12062e-05
TSHZ3	11.246	-7.43167	1.55322	-4.7847	1.71244e-06	2.12062e-05
RPL7AP64	3.38377	-6.02379	1.25909	-4.78425	1.71631e-06	2.12256e-05
CTD.2561B21.11	9.66845	2.62207	0.548064	4.78424	1.71636e-06	2.12256e-05
USB1	422.687	-1.04859	0.219195	-4.78382	1.71994e-06	2.12576e-05
HERC2	153.533	1.26212	0.263871	4.7831	1.72612e-06	2.13217e-05
GPNMB	40.0899	-4.48247	0.937991	-4.7788	1.76344e-06	2.17576e-05
FANCG	112.291	2.01995	0.422757	4.77804	1.77014e-06	2.18276e-05
DNTT	1375.57	8.45337	1.77034	4.77499	1.79712e-06	2.21476e-05
PFDN4	149.229	1.05465	0.220903	4.77428	1.80351e-06	2.22135e-05
DTWD1	145.038	1.13573	0.237907	4.77386	1.80732e-06	2.22477e-05
NCOA3	764.596	-1.03538	0.216917	-4.77315	1.81367e-06	2.23131e-05
DPEP1	8.07201	7.51324	1.57477	4.771	1.83315e-06	2.25397e-05
STAG3L3	35.2877	2.24113	0.469852	4.76987	1.84349e-06	2.26539e-05
CENPH	81.2773	2.32885	0.488291	4.76939	1.84781e-06	2.2694e-05
LL21NC02.1C16.2	4.63614	-4.77508	1.00158	-4.76756	1.86467e-06	2.28879e-05
MUC12	14.4489	-3.56517	0.747907	-4.76686	1.87118e-06	2.29547e-05
RP2	492.465	-1.26837	0.266126	-4.76605	1.87869e-06	2.30336e-05
C5orf58	10.5033	-2.80147	0.587932	-4.76495	1.88905e-06	2.31473e-05
STXBP4	42.8266	2.43732	0.511549	4.76459	1.89241e-06	2.31753e-05
SEZ6L	48.6067	-5.69821	1.19621	-4.76357	1.90202e-06	2.32797e-05
LBH	39.7951	2.93254	0.615689	4.76302	1.90716e-06	2.33292e-05
RP11.42I10.1	5.63867	-2.94656	0.618972	-4.76041	1.93202e-06	2.36199e-05
DDHD2	336.84	1.32869	0.279177	4.75932	1.94247e-06	2.37272e-05
FUNDC1	110.382	1.39488	0.293087	4.75926	1.94302e-06	2.37272e-05
CTD.2368P22.1	24.4828	2.3979	0.503855	4.7591	1.94461e-06	2.37331e-05
ZCCHC7	314.749	1.4711	0.309228	4.75731	1.96187e-06	2.39301e-05
FHOD3	4.8001	3.62489	0.762154	4.75611	1.97355e-06	2.40589e-05
HLA.C	6766.3	-1.74928	0.367845	-4.75548	1.97976e-06	2.41208e-05
ZWILCH	145.826	1.61675	0.340025	4.75479	1.98654e-06	2.41897e-05
RP11.332H14.2	78.1295	1.90806	0.401452	4.7529	2.00523e-06	2.43896e-05
C3orf58	339.056	-1.73367	0.364758	-4.75293	2.00487e-06	2.43896e-05
OSR2	78.1339	-5.00754	1.0536	-4.75278	2.00643e-06	2.43903e-05
GPSM2	172.625	2.46607	0.519109	4.75057	2.02842e-06	2.46437e-05
CEP135	174.304	1.1433	0.24069	4.75011	2.03311e-06	2.46866e-05
TRIM68	93.2934	1.56247	0.328952	4.74983	2.03588e-06	2.47062e-05
RP11.373D23.2	45.3919	-2.44093	0.513914	-4.74968	2.03742e-06	2.47109e-05
IKBKG	32.1308	-1.39216	0.293213	-4.74793	2.05508e-06	2.49111e-05
ADRBK2	251.759	-1.64564	0.346815	-4.74501	2.085e-06	2.52594e-05
FAM53B	152.431	-1.45415	0.306485	-4.74459	2.08928e-06	2.52941e-05
ABCC1	206.124	1.5754	0.332047	4.7445	2.09022e-06	2.52941e-05
ATP11A	161.998	-1.72869	0.364385	-4.74414	2.0939e-06	2.53242e-05
TNNT3	17.5692	3.94005	0.830584	4.74371	2.09836e-06	2.53639e-05
AGTPBP1	635.196	-1.72599	0.363882	-4.74326	2.10303e-06	2.5406e-05
GUK1	987.389	-1.13438	0.239193	-4.74253	2.11063e-06	2.54834e-05
ABHD5	182.039	-1.55593	0.328369	-4.73835	2.15462e-06	2.59999e-05
QTRT1	208.367	1.42687	0.301161	4.73789	2.15957e-06	2.60302e-05
ZNF280B	30.0083	3.8753	0.817928	4.73795	2.15895e-06	2.60302e-05
DCUN1D4	190.74	1.12544	0.237564	4.73741	2.16464e-06	2.60767e-05
FAM214B	231.517	-1.60027	0.337878	-4.73623	2.17735e-06	2.62151e-05
CIRH1A	418.237	1.19122	0.251573	4.73509	2.18962e-06	2.6348e-05
TRBVB	35.877	5.48967	1.15946	4.7347	2.1938e-06	2.63835e-05
TCF4	773.198	2.51964	0.532259	4.73385	2.20296e-06	2.64788e-05
OSTM1	286.602	-2.0565	0.434507	-4.73296	2.21273e-06	2.65813e-05
RP11.213G2.1	3.36654	-5.2974	1.11932	-4.73269	2.21568e-06	2.66019e-05
RNU6.2	6.40944	-3.23	0.682568	-4.73213	2.22177e-06	2.666e-05
RNF149	1324.72	-1.49141	0.31518	-4.73191	2.22414e-06	2.66615e-05
HLA.F	348.001	-2.47828	0.52374	-4.73189	2.22439e-06	2.66615e-05
SEC61A2	87.8182	1.90357	0.402415	4.73036	2.24124e-06	2.68485e-05
ARF6	1242.28	-1.42357	0.301005	-4.72938	2.25208e-06	2.69633e-05
ZNF251	98.2548	1.42797	0.301968	4.72887	2.25777e-06	2.70163e-05
SASS6	43.0599	1.46495	0.309817	4.72843	2.26264e-06	2.70595e-05
IFT122	185.233	1.52118	0.321837	4.72654	2.28379e-06	2.72971e-05
TCTEX1D4	30.7397	-2.31575	0.490111	-4.72495	2.3017e-06	2.74959e-05
SSPN	8.61615	5.37143	1.13698	4.72428	2.3093e-06	2.75559e-05
RP13.516M14.2	4.70606	-3.85706	0.816414	-4.72439	2.30806e-06	2.75559e-05
SBNO2	80.3721	-2.02922	0.429865	-4.72059	2.35166e-06	2.80457e-05
MCM4	819.674	2.49103	0.527735	4.72022	2.3559e-06	2.80807e-05
HAUS3	313.281	1.38978	0.294534	4.71856	2.37522e-06	2.82952e-05
CSF1R	1783.6	-3.42592	0.726084	-4.71836	2.37755e-06	2.83072e-05
IL10RA	2499	-3.4794	0.737602	-4.71717	2.39146e-06	2.84571e-05
RP11.22B23.1	22.5981	1.81232	0.384227	4.71678	2.39602e-06	2.84797e-05
MKS1	102.55	1.83764	0.389596	4.71678	2.39603e-06	2.84797e-05
PLK4	109.166	2.37484	0.503519	4.71648	2.39958e-06	2.85062e-05
ARHGEF17	55.0687	3.22254	0.683521	4.71462	2.42162e-06	2.87521e-05
CCDC9	102.148	-2.02138	0.428877	-4.71318	2.43883e-06	2.89403e-05
C19orf59	164.669	-4.49337	0.953797	-4.71103	2.46464e-06	2.92304e-05
MKRN1	1546.19	-1.38408	0.293849	-4.71018	2.47496e-06	2.93365e-05
KIAA0391	7.45046	2.04408	0.434076	4.70903	2.48895e-06	2.9486e-05
RENBP	44.3177	-1.82387	0.387425	-4.70767	2.50567e-06	2.96677e-05
GGA2	734.773	-1.38231	0.293666	-4.7071	2.51265e-06	2.97339e-05
CSTF3	161.584	1.35596	0.288238	4.70429	2.54749e-06	3.01296e-05
CKAP4	145.123	-4.08355	0.868125	-4.70387	2.55278e-06	3.01755e-05
GGA1	604.248	-1.59258	0.3386	-4.70342	2.55839e-06	3.02251e-05
IL31RA	15.7933	-4.44256	0.944588	-4.70317	2.56151e-06	3.02453e-05
CDC42SE1	545.805	-1.20864	0.257047	-4.70201	2.57609e-06	3.04007e-05
WDR34	165.209	2.32382	0.494265	4.70157	2.58172e-06	3.04504e-05
SULF2	294.822	-3.66673	0.779967	-4.70114	2.58718e-06	3.0498e-05
CASP9	183.217	-1.26022	0.268138	-4.69991	2.60282e-06	3.06655e-05
ADARB2	4.91907	5.23594	1.1141	4.69969	2.60558e-06	3.06811e-05
SNX29	264.189	-1.33204	0.283582	-4.69718	2.63784e-06	3.10439e-05
SHANK3	4.28916	4.88903	1.04117	4.6957	2.65693e-06	3.12514e-05
MIR3945	11.6091	-3.75035	0.798737	-4.69534	2.66158e-06	3.1289e-05
RP11.798K23.5	11.0327	2.875	0.612343	4.69508	2.66506e-06	3.13126e-05
FAM117A	234.013	2.05403	0.437583	4.69404	2.67865e-06	3.1455e-05
ADAM9	418.801	-2.0921	0.445721	-4.69375	2.68242e-06	3.14821e-05
MAP3K3	174.479	-1.50814	0.321375	-4.69278	2.69511e-06	3.15964e-05
METRNL	124.839	-2.95845	0.630465	-4.6925	2.69892e-06	3.16237e-05
CHAF1B	80.3941	2.99746	0.638828	4.69213	2.70379e-06	3.16634e-05
CTC.523E23.11	10.2685	4.61965	0.98463	4.69176	2.70859e-06	3.17024e-05
DOCK2	1833.02	-1.25172	0.266808	-4.69148	2.71242e-06	3.17298e-05
UPF3A	115.87	1.00666	0.214709	4.68846	2.75262e-06	3.21825e-05
DNASE1L1	83.0054	-1.25477	0.267649	-4.68813	2.75717e-06	3.22181e-05
ZNF620	29.8346	2.63405	0.56202	4.68676	2.77566e-06	3.24165e-05
PSEN1	828.187	-1.30519	0.278524	-4.68609	2.78468e-06	3.25041e-05
CAMSAP2	7.13762	-4.62973	0.988005	-4.68593	2.78685e-06	3.25118e-05
THYN1	277.027	1.18412	0.252856	4.68296	2.82768e-06	3.29522e-05
SULT1C4	41.1216	4.71228	1.00648	4.68193	2.84187e-06	3.30996e-05
RP11.70C1.1	9.05006	-2.55955	0.546762	-4.68128	2.8509e-06	3.31866e-05
LINC01010	3.32441	-5.60937	1.19851	-4.68029	2.86467e-06	3.33288e-05
LHX6	14.6106	7.30371	1.56106	4.6787	2.88705e-06	3.35377e-05
HSF4	13.0501	-2.7132	0.579907	-4.67868	2.88732e-06	3.35377e-05
MAP7D3	167.734	1.51644	0.32411	4.67879	2.88571e-06	3.35377e-05
ABCE1	491.057	1.26282	0.270046	4.6763	2.92095e-06	3.38916e-05
TNK2	115.599	-1.42764	0.305342	-4.67556	2.9315e-06	3.39955e-05
QPCT	224.417	-4.25299	0.909648	-4.67542	2.93348e-06	3.40001e-05
SCRN2	175.486	1.15631	0.247351	4.67476	2.94297e-06	3.40733e-05
MMAB	93.3352	1.45905	0.312147	4.67424	2.95043e-06	3.4123e-05
FLCN	90.454	-1.49435	0.319699	-4.67424	2.95045e-06	3.4123e-05
GLIPR2	1445.44	-1.94162	0.415621	-4.67162	2.9884e-06	3.45246e-05
ZNF69	66.3781	2.01779	0.431916	4.67172	2.98686e-06	3.45246e-05
MBLAC2	45.4926	2.28101	0.488553	4.6689	3.0281e-06	3.49455e-05
MPRIP	96.9926	1.38497	0.296645	4.66879	3.02982e-06	3.49465e-05
TRMT10C	233.224	1.11258	0.238311	4.66862	3.03224e-06	3.49556e-05
CDKN2AIP	346.006	1.44833	0.31027	4.66795	3.04213e-06	3.50508e-05
KRR1	276.518	1.23306	0.264203	4.66709	3.05493e-06	3.51793e-05
TFB2M	190.851	1.21124	0.25954	4.66685	3.05849e-06	3.52014e-05
SEMA6A	47.0485	3.21838	0.689731	4.66614	3.06907e-06	3.53043e-05
AC132216.1	17.8402	2.72957	0.585003	4.66591	3.07251e-06	3.53247e-05
HEMGN	174.557	5.53307	1.18589	4.66574	3.07509e-06	3.53355e-05
RAD51C	165.207	1.02699	0.220119	4.6656	3.07719e-06	3.53407e-05
AIF1L	75.7545	5.05246	1.08306	4.66498	3.08643e-06	3.54278e-05
MVP	1232.67	-1.83187	0.392793	-4.66369	3.10586e-06	3.56317e-05
RP11.452L6.1	22.6317	2.19974	0.47172	4.66322	3.11302e-06	3.56948e-05
NUP155	177.405	1.08416	0.232507	4.66292	3.11748e-06	3.57268e-05
SNORD78	7.60331	1.87983	0.403206	4.6622	3.12843e-06	3.58331e-05
HIVEP3	189.081	-1.76305	0.378278	-4.66074	3.15069e-06	3.60687e-05
MLF1IP	415.243	2.49062	0.534504	4.65967	3.16709e-06	3.62372e-05
MCTP1	738.606	-1.19136	0.255683	-4.65953	3.16929e-06	3.6243e-05
DNAH14	32.8631	3.66119	0.785852	4.65888	3.17938e-06	3.63389e-05
IFITM10	31.9885	-3.62577	0.778307	-4.65854	3.18457e-06	3.63789e-05
GCFC2	134.745	1.30885	0.280966	4.65838	3.18707e-06	3.6388e-05
FAM168A	79.077	-1.18244	0.253841	-4.6582	3.18994e-06	3.64013e-05
SMC2	229.119	1.72329	0.370025	4.65723	3.20485e-06	3.6552e-05
JDP2	56.4812	-2.47034	0.53048	-4.6568	3.21155e-06	3.66089e-05
FYN	106.591	-1.98674	0.426667	-4.65642	3.21752e-06	3.6638e-05
DNAH17	21.0307	-1.93034	0.414573	-4.65621	3.22079e-06	3.66558e-05
TUBE1	92.5562	1.30339	0.279949	4.6558	3.22733e-06	3.67107e-05
FGD6	76.077	-3.3859	0.727439	-4.65455	3.24696e-06	3.69143e-05
PLSCR1	911.033	-1.89928	0.40813	-4.65363	3.26145e-06	3.70594e-05
CEP76	66.5645	1.39173	0.299086	4.65329	3.26673e-06	3.70997e-05
AC006129.1	135.543	-2.13002	0.457769	-4.65306	3.27052e-06	3.71231e-05
CLEC1A	4.11934	-5.17997	1.1134	-4.65238	3.2813e-06	3.72257e-05
ZNF521	336.058	5.09578	1.09538	4.65207	3.28623e-06	3.72619e-05
HERC2P2	131.135	1.91837	0.412509	4.65049	3.3115e-06	3.74889e-05
ARHGAP17	446.166	-1.2565	0.270223	-4.64985	3.3218e-06	3.75792e-05
LIMA1	74.177	2.47448	0.532329	4.64841	3.345e-06	3.78082e-05
WDR19	87.7447	2.08435	0.448442	4.64797	3.35214e-06	3.78689e-05
SIGLEC1	119.092	-6.509	1.40063	-4.6472	3.3647e-06	3.79908e-05
EGR2	706.032	-3.48381	0.749817	-4.64621	3.38082e-06	3.81527e-05
ZNF146	530.684	1.70521	0.367039	4.64584	3.38687e-06	3.82009e-05
WDR76	85.0291	2.44946	0.527297	4.6453	3.39575e-06	3.82607e-05
SERPINB8	278.072	-2.5332	0.545574	-4.64318	3.43092e-06	3.86163e-05
TULP2	12.8509	-2.54549	0.548221	-4.64318	3.43091e-06	3.86163e-05
NIP7	221.998	1.24862	0.26899	4.64189	3.45239e-06	3.88376e-05
C1orf213	23.674	2.44917	0.528057	4.63808	3.51665e-06	3.95397e-05
ALG1L2	3.69043	4.72535	1.01894	4.63752	3.52606e-06	3.96056e-05
ZNF260	97.775	1.68987	0.364391	4.63752	3.52621e-06	3.96056e-05
MAP2K3	1167.3	-1.49499	0.32239	-4.6372	3.53167e-06	3.96462e-05
C3orf33	41.6239	1.98801	0.428794	4.63628	3.54738e-06	3.97808e-05
GNGT2	38.817	-4.58692	0.990232	-4.63217	3.6186e-06	4.05583e-05
UPF2	392.368	1.04872	0.226463	4.63086	3.64155e-06	4.07617e-05
C14orf80	49.2734	-1.67481	0.361769	-4.62951	3.66528e-06	4.09957e-05
TMSB10	4262.39	-1.52431	0.329317	-4.62871	3.67952e-06	4.11334e-05
ZIK1	91.1718	2.89672	0.626219	4.62573	3.73277e-06	4.17069e-05
KAT6B	423.44	1.03195	0.223119	4.62511	3.74404e-06	4.18111e-05
CTC.297N7.9	5.32565	3.18934	0.6896	4.62491	3.7476e-06	4.1829e-05
AOX3P	14.5615	5.79063	1.25215	4.62455	3.75412e-06	4.18799e-05
RANBP1	584.868	1.28156	0.277276	4.62196	3.8014e-06	4.23854e-05
PTK2B	1289.64	-1.18961	0.257417	-4.62135	3.81252e-06	4.2465e-05
SLC10A1	24.8307	-2.94254	0.636778	-4.62098	3.81938e-06	4.25194e-05
SERTAD1	351.274	-1.64838	0.356731	-4.62079	3.82277e-06	4.2535e-05
CTC.297N7.5	8.92909	3.55067	0.768436	4.62064	3.82549e-06	4.25432e-05
RN7SL798P	19.476	-2.44651	0.529506	-4.62036	3.83074e-06	4.25795e-05
RP11.1017G21.5	40.6619	-2.03103	0.43976	-4.6185	3.86526e-06	4.29409e-05
PHTF1	524.621	1.17766	0.255023	4.61786	3.87716e-06	4.30473e-05
PSMA7	2450.1	-1.05025	0.227436	-4.61777	3.87886e-06	4.30473e-05
TANK	838.698	-1.05029	0.227496	-4.61675	3.89802e-06	4.31704e-05
CTC.459F4.3	53.3486	1.23678	0.267899	4.61658	3.90106e-06	4.31819e-05
ZMIZ2	83.1707	-1.02108	0.221215	-4.61576	3.91652e-06	4.33305e-05
WRN	110.314	1.26496	0.274079	4.61533	3.92475e-06	4.33992e-05
CCDC69	766.926	-1.8557	0.402109	-4.61491	3.93272e-06	4.34649e-05
XRCC2	43.5989	2.90212	0.62901	4.61378	3.95403e-06	4.36779e-05
ABCD4	337.703	1.01544	0.220149	4.61252	3.9782e-06	4.39222e-05
GPR65	140.397	-3.94632	0.855742	-4.61158	3.99622e-06	4.40843e-05
AC007228.11	7.58207	3.8633	0.837747	4.61154	3.997e-06	4.40843e-05
FAM98B	72.3829	1.67706	0.363695	4.61118	4.00383e-06	4.41369e-05
CTPS1	271.938	1.50517	0.32643	4.61099	4.00759e-06	4.41557e-05
CATSPER2	16.2179	2.09214	0.453813	4.61014	4.02399e-06	4.43136e-05
CTD.3187F8.15	2.76276	-5.08757	1.1038	-4.60916	4.04303e-06	4.45003e-05
PABPC4	193.803	-1.54358	0.334904	-4.60902	4.04562e-06	4.4506e-05
IL1RL2	4.36307	-6.42228	1.39364	-4.60829	4.05996e-06	4.46325e-05
NOC3L	102.054	1.8407	0.39948	4.60773	4.07094e-06	4.47156e-05
GTF3C4	108.039	1.40728	0.305751	4.60271	4.17034e-06	4.5784e-05
RABGEF1	43.3244	-2.07862	0.451903	-4.59971	4.23083e-06	4.64243e-05
TM7SF3	1098.69	1.71973	0.37415	4.59638	4.29904e-06	4.71486e-05
ASGR1	69.4818	-3.13532	0.68223	-4.5957	4.31303e-06	4.72778e-05
RP11.327F22.6	3.83389	-4.26922	0.929239	-4.59432	4.34169e-06	4.75676e-05
SPHK1	132.73	-3.19165	0.695029	-4.59211	4.38778e-06	4.80234e-05
CXCL16	766.187	-4.7389	1.0321	-4.5915	4.40069e-06	4.81401e-05
YARS2	144.374	1.02944	0.224301	4.58955	4.44211e-06	4.85684e-05
MTERFD3	51.9221	2.33559	0.508923	4.58928	4.44776e-06	4.86054e-05
SHISA4	12.7397	-3.34147	0.7286	-4.58614	4.51509e-06	4.92895e-05
PKN1	648.807	-1.09533	0.23884	-4.58604	4.51727e-06	4.92895e-05
TLN1	1509.45	-1.7234	0.375818	-4.58572	4.52421e-06	4.93401e-05
MIB1	110.428	1.29693	0.282833	4.5855	4.529e-06	4.93672e-05
UCP2	2902.03	-1.49094	0.325216	-4.58445	4.55189e-06	4.95915e-05
KRT8	15.7432	3.78714	0.826346	4.583	4.58358e-06	4.99114e-05
ERN1	140.285	-1.74343	0.380506	-4.58187	4.60845e-06	5.01567e-05
RP11.490O6.2	19.9665	-2.54881	0.556457	-4.58044	4.64009e-06	5.04754e-05
AC104695.3	4.95663	-3.53737	0.772323	-4.58017	4.64591e-06	5.0513e-05
NIT2	385.248	1.16639	0.254691	4.5796	4.65862e-06	5.06256e-05
TNK2.AS1	9.33219	-3.03099	0.66192	-4.5791	4.66988e-06	5.07221e-05
PTPN6	3367.87	-1.3334	0.29138	-4.57617	4.73573e-06	5.14113e-05
MTMR2	319.953	1.13728	0.248565	4.57539	4.7534e-06	5.1577e-05
GEMIN8	68.943	1.24438	0.272074	4.57369	4.79202e-06	5.19698e-05
AP002954.4	3.41063	-6.00123	1.31222	-4.57335	4.79978e-06	5.20275e-05
RAD51D	61.3678	1.42097	0.310725	4.57309	4.80594e-06	5.2068e-05
C2CD2L	80.7013	-1.77648	0.388547	-4.5721	4.82865e-06	5.22875e-05
TEX9	14.8559	2.82028	0.616859	4.57199	4.83108e-06	5.22875e-05
MNAT1	74.2042	1.21697	0.266191	4.57178	4.83596e-06	5.23139e-05
SLC27A5	21.8713	1.84071	0.402666	4.5713	4.84698e-06	5.24066e-05
CPD	734.03	-2.38977	0.522925	-4.57	4.87715e-06	5.27062e-05
CMAHP	302.149	1.64076	0.359099	4.56909	4.89839e-06	5.28824e-05
FANCI	206.577	1.7053	0.373222	4.56913	4.89751e-06	5.28824e-05
OXCT1	165.212	2.32436	0.508835	4.568	4.92396e-06	5.31111e-05
WIPI1	125.568	-2.55732	0.559837	-4.56798	4.92454e-06	5.31111e-05
RNF144B	456.981	-2.84343	0.622521	-4.56761	4.93317e-06	5.31774e-05
C7orf43	32.6808	-1.45467	0.318505	-4.56718	4.94339e-06	5.32608e-05
DPEP2	342.755	-1.83455	0.40172	-4.56674	4.95358e-06	5.33437e-05
RP11.624L4.1	2.36989	-5.17785	1.13476	-4.56294	5.04428e-06	5.42932e-05
RN7SL138P	4.87962	-4.96018	1.08732	-4.56182	5.07127e-06	5.45563e-05
LAPTM5	12703.1	-1.47053	0.322384	-4.56142	5.0808e-06	5.46313e-05
JAM3	24.7036	4.8776	1.06956	4.56039	5.10591e-06	5.48738e-05
RP11.89H19.1	3.08975	-4.67009	1.02412	-4.56009	5.11328e-06	5.48979e-05
DENND1C	367.802	-1.04117	0.228318	-4.56018	5.11109e-06	5.48979e-05
MYH10	64.0618	2.77164	0.607853	4.55973	5.122e-06	5.4964e-05
PPM1M	186.282	-2.59928	0.570076	-4.55953	5.12686e-06	5.49885e-05
ATF3	4735.86	-2.33912	0.513103	-4.55877	5.14548e-06	5.51331e-05
ZNF112	14.2082	6.96544	1.52789	4.55885	5.14333e-06	5.51331e-05
TNFRSF14	423.758	-2.23578	0.49051	-4.55807	5.16253e-06	5.52882e-05
GUSBP9	9.87584	2.26422	0.49685	4.55715	5.18512e-06	5.55023e-05
KCNJ2	44.2086	-5.7516	1.26216	-4.55694	5.19043e-06	5.55314e-05
RP11.902B17.1	8.24116	4.88829	1.07278	4.55668	5.19695e-06	5.55733e-05
EPHA7	6.00027	22.8256	5.01025	4.55578	5.21926e-06	5.57841e-05
GCH1	414.766	-3.31508	0.727731	-4.55536	5.22964e-06	5.58671e-05
ADAMTS6	9.30969	3.37736	0.741554	4.55444	5.25262e-06	5.60288e-05
NAPSB	400.122	-4.24022	0.931003	-4.55447	5.25184e-06	5.60288e-05
RP11.620J15.3	250.226	2.17313	0.477247	4.55347	5.2768e-06	5.62587e-05
UCHL5	362.811	1.01119	0.222087	4.5531	5.28618e-06	5.63307e-05
PPP2R5B	67.355	-1.76805	0.388326	-4.55299	5.2889e-06	5.63317e-05
ZNF766	353.85	1.29178	0.283963	4.5491	5.3875e-06	5.73533e-05
HMGN5	41.9589	2.71779	0.597491	4.54868	5.39845e-06	5.74413e-05
IER5	153.202	-1.95307	0.429442	-4.54793	5.4176e-06	5.76164e-05
VWA9	286.78	1.25891	0.276822	4.54771	5.42318e-06	5.76471e-05
MRFAP1L1	186.654	1.40683	0.309421	4.54666	5.4504e-06	5.78791e-05
TAF1A	32.8589	1.97686	0.434859	4.54597	5.46833e-06	5.80408e-05
TM9SF4	713.812	-1.11978	0.246373	-4.54505	5.4923e-06	5.82662e-05
RUVBL2	467.586	1.41169	0.310649	4.54433	5.51107e-06	5.84364e-05
ZNF827	60.8004	4.09338	0.900839	4.54396	5.5207e-06	5.85096e-05
NTRK1	17.3608	6.30116	1.38696	4.54314	5.54214e-06	5.87077e-05
CTC.241N9.1	6.52864	2.72196	0.599283	4.54204	5.57135e-06	5.89881e-05
CENPK	125.428	2.43063	0.53524	4.54119	5.59376e-06	5.91375e-05
PSIP1	345.96	1.37433	0.302635	4.5412	5.59344e-06	5.91375e-05
MYO5A	329.639	-1.6499	0.363316	-4.54124	5.59245e-06	5.91375e-05
DHX34	181.409	-1.43458	0.315988	-4.53999	5.62567e-06	5.94456e-05
RAB9B	11.1066	5.02501	1.107	4.5393	5.64412e-06	5.96111e-05
SCN4B	10.2061	-6.66842	1.46925	-4.53867	5.66099e-06	5.97599e-05
ADCY4	42.7188	-2.33509	0.514537	-4.53823	5.67296e-06	5.98272e-05
MARCH2	237.116	-1.7502	0.385657	-4.53824	5.67256e-06	5.98272e-05
THEMIS2	1589.28	-2.0942	0.461514	-4.53767	5.6878e-06	5.99542e-05
RNF144A	136.248	2.47877	0.546365	4.53683	5.71053e-06	6.01051e-05
SATB1	853.608	1.94161	0.427955	4.53694	5.70755e-06	6.01051e-05
AP001469.9	13.4703	3.15181	0.694708	4.53689	5.70904e-06	6.01051e-05
PTPN7	1030.97	1.45481	0.320725	4.53599	5.73331e-06	6.02856e-05
BCAT1	632.825	2.19914	0.484881	4.53542	5.7488e-06	6.04188e-05
TMEM55B	507.073	-1.1811	0.260515	-4.53371	5.79578e-06	6.08759e-05
PIGW	69.374	1.47308	0.324924	4.53363	5.79797e-06	6.08759e-05
PDIK1L	130.639	1.38395	0.305282	4.53334	5.80589e-06	6.09291e-05
PHOSPHO2	37.1692	1.61654	0.356681	4.53218	5.83785e-06	6.12345e-05
RP11.157E21.1	4.06452	-5.20004	1.14751	-4.53158	5.85451e-06	6.13792e-05
NDOR1	77.8344	-1.59148	0.351613	-4.52621	6.00508e-06	6.2927e-05
ARID1B	310.609	1.35817	0.300131	4.52527	6.03197e-06	6.31779e-05
RP11.35J23.1	3.94038	5.87405	1.29819	4.52479	6.04558e-06	6.32895e-05
MECR	111.044	1.36178	0.301018	4.52393	6.07007e-06	6.35148e-05
CCDC104	96.9855	1.75371	0.387693	4.52345	6.08399e-06	6.36293e-05
RP1.152L7.5	15.2444	4.50123	0.995123	4.52328	6.08873e-06	6.36478e-05
NDUFA2	249.948	-1.01393	0.22417	-4.52304	6.09575e-06	6.36902e-05
RP11.149I2.4	3.60072	-4.48973	0.992669	-4.52289	6.10007e-06	6.37042e-05
VNN2	373.425	-4.2695	0.944399	-4.52086	6.15875e-06	6.41845e-05
DDX11	122.486	1.79831	0.397783	4.52083	6.15968e-06	6.41845e-05
ZDHHC20	167.774	-1.4168	0.313436	-4.52021	6.17773e-06	6.4327e-05
GOT2	446.38	1.08989	0.241136	4.51982	6.18926e-06	6.44158e-05
CFLAR.AS1	10.682	-2.99586	0.662953	-4.51896	6.21438e-06	6.46458e-05
N6AMT1	37.2942	2.09657	0.463982	4.51864	6.2237e-06	6.47113e-05
NME7	112.069	2.16054	0.478156	4.51847	6.22873e-06	6.47323e-05
KIAA1549	22.458	3.59413	0.795751	4.51665	6.28269e-06	6.52598e-05
MAPK12	36.4938	2.50711	0.555095	4.51655	6.28558e-06	6.52598e-05
GKAP1	24.4466	2.10888	0.467212	4.51375	6.36898e-06	6.60616e-05
FBXO4	93.4284	1.4042	0.311162	4.51274	6.3994e-06	6.62524e-05
CTC.205M6.5	13.2456	-3.06316	0.678763	-4.51286	6.39592e-06	6.62524e-05
TSPAN14	1103.73	-1.99731	0.442567	-4.51302	6.39102e-06	6.62524e-05
SLC8B1	467.545	-1.36561	0.302613	-4.51273	6.39975e-06	6.62524e-05
TMSB15B	29.3049	2.88323	0.639089	4.51148	6.43773e-06	6.66134e-05
RNF19B	86.0871	-1.84692	0.40941	-4.51119	6.4465e-06	6.66719e-05
SPIN2B	28.3352	1.45207	0.322184	4.50696	6.57623e-06	6.79153e-05
AP000240.9	3.19295	-4.10077	0.910534	-4.5037	6.67811e-06	6.89341e-05
IDH2	1867.84	1.16594	0.258902	4.50338	6.68808e-06	6.90038e-05
FBXO6	144.888	-2.16452	0.480719	-4.50267	6.71059e-06	6.92027e-05
DET1	44.963	1.35488	0.300919	4.50248	6.71661e-06	6.92315e-05
GNA14	6.5663	-5.97029	1.32631	-4.50143	6.74971e-06	6.95058e-05
SLC12A2	150.85	1.96274	0.436057	4.50112	6.75956e-06	6.95412e-05
RP11.398K22.12	10.2865	2.86246	0.636059	4.50031	6.78542e-06	6.97729e-05
FAM20A	25.6942	-4.22245	0.938483	-4.49922	6.82017e-06	7.00629e-05
CRHBP	59.3074	4.65946	1.03568	4.49893	6.82956e-06	7.01258e-05
GCSH	6.12449	2.55089	0.56712	4.49797	6.86068e-06	7.04116e-05
FZD1	34.3146	-2.72045	0.605046	-4.49627	6.91569e-06	7.09421e-05
CMKLR1	48.1052	-5.27575	1.17361	-4.4953	6.9472e-06	7.12312e-05
[truncated: 3,770 more rows]

## Sheet: Supplemental Table 4
Supplemental Table 4. Summary of clinical and molecular data in Figure 4
																																5-AZA/VEN ex vivo Treatment
																													Phenotyping			Live as % of AML Untreated			MAC-Score
AML-Number	sample from	Cohort	RNA-seq	Firstline Treatment	Firstline Response	Salvage Treatment	Salvage Response	EFS (days)	Outcome (bsaed on EFS)	Female	Karyotype	SVs	Complex karyotype	Mutations (Myeloid panel)	allo TX in CR	BH3-profiling	Refractory	TP53	RUNX1	FLT3	DNMT3A	NRAS/KRAS	IDH1/2	ASXL1	Splicing	TET2	NPM1	JAK2/CALR	LSC (%)	Non-LSC (%)	Mature (%)	LSCs (%)	Non-LSC (%)	Mature (%)	LSC
3	Diagnosis	1		5-AZA/VEN	PD/SD			40	1	no	46, XY, del(5)(q31q33), del(13)(q12q14), del(21)(q22)	3	yes	JAK2, TP53, TET2	no		yes	yes	no	no	no	no	no	no	no	yes	no	yes	45.3	36.2	1.28				0.100274
6	Diagnosis	1		5-AZA/VEN	PD/SD			1	1	no	46,XY,der(4)t(4;15)(p16;q22),t(6;11)(p23;q25),del(11)(q13),der(15)t(11;15)(q13;q24),t(18;19)(q21;q13.1), AML aus PMF, Z.n. 2xallo, PMF	3	yes	ASXL1	no		yes	no	no	no	no	no	no	yes	no	no	no	no	45.7	5.88	39.8	12.8	45.4	71.7	0.105869
8	Diagnosis	1		5-AZA/VEN	PD/SD			86	1	yes	45,XX,add(4)(p15),del(5)(q22q35),add(7)(q21),+8,dic(9;12)(p13;p13),-11,-15,add(19)(q13.4), +r(?11)[15]/45,XX,sl,-dic(9;12)(p13;p13),add(9)(p13),-12[5]	3	yes	DNMT3A R729; TP53; RUNX1	no		yes	yes	yes	no	yes	no	no	no	no	no	no	no	81.5	14.2	0.3	6	32.2		0.128394
10	Diagnosis	1		5-AZA/VEN	PD/SD			16	1	no	46,XY,dup(1)(p13p36),del(3)(q23),del(5)(q13q33)[9]/45,sl,-17[11]	3	yes	NF1	no	yes	yes	no	no	no	no	no	no	no	no	no	no	no	70.7	5.83	19	31.9	139	126	0.077325
22	Diagnosis	1		5-AZA/VEN	PD/SD			144	1	yes	43~46,XX, del(5)(q21q34),add(6)(p22),-7,add(7)(q21),add(9)(q34),-10,add(10)(q24),add(11)(p15),add(11)(q24),add(13)(p13)(p13),-17,-18,add(19)(q13),+2mar[cp15].nuc ish 3q26(EVI1x2)[99/100],11q23(MLLx3~100)[26/100]	3	yes	TP53	no		yes	yes	no	no	no	no	no	no	no	no	no	no	44.6	17.2	29.3	20.9	27.1	75.8	0.205657
23	Diagnosis	1		5-AZA/VEN	PD/SD			318	1	yes	46,XX(15)	0	no	NPM1, TET2	no		yes	no	no	no	no	no	no	no	no	yes	yes	no	2.29	60.6	31.6	51.6	28.5	123.2	0.301876
29	Diagnosis	1		5-AZA/VEN	PD/SD			11	1	no	47,XY,+8,add(12)(p13),-15,add(17)(p12),+21[7]/46,XY[13]	3	yes	JAK2(V617F), IDH2, SRSF2, RUNX1	no	yes	yes	no	yes	no	no	no	yes	no	yes	no	no	yes	40.1	43.2	6.12	8	5	69	0.263845
41	Diagnosis	1		5-AZA/VEN	CR/MLFS			39	1	yes	46,XX	0	no	TET2, DNMT3A, KRAS, WT1	no		no	no	no	no	yes	yes	no	no	no	yes	no	no	29.3	19.6	40.9	13.9	50.3	68	0.361912
42	Diagnosis	1		5-AZA/VEN	PD/SD			90	1	no	46,XY	0	no	IDH2, ASXL1, DNMT3A	no		yes	no	no	no	yes	no	yes	yes	no	no	no	no	6.65	19.7	63				0.414235
45	Diagnosis	1		5-AZA/VEN	CR/MLFS			116	1	no	47,XY,+13[5]/48,sl,+8[15]	2	no	RUNX1, SRSF1, IDH1, TET2	no		no	no	yes	no	no	no	yes	no	yes	yes	no	no	16.6	70.4	1.01	10	4	90	0.400876
51	Diagnosis	1		Decitabine/VEN	CR/MLFS			76	0	yes	46,XX	0	no	NPM1	no	yes	no	no	no	no	no	no	no	no	no	no	yes	no	6.43	9.71	53.2				0.59608
54	Diagnosis	1		5-AZA/VEN	CR/MLFS			189	0	no	46,XY,del5q(q31q35)	1	no	-	yes	yes	no	no	no	no	no	yes	no	no	no	no	no	no	17.3	55.7	17.9	2.3	2	57	0.56263
57	Diagnosis	1	yes	5-AZA/VEN	CR/MLFS			30	0	yes	46,XX	0	no	DNMT3A, NPM1	no	yes	no	no	no	no	yes	no	no	no	no	no	yes	no	18.7	71.4	0.19	12	5	14	0.615851
59	Diagnosis	1		5-AZA/VEN	CR/MLFS			160	0	no	46,XY	0	no	DNMT3A, NPM1, KRAS	yes		no	no	no	no	yes	yes	no	no	no	no	yes	no	32	61.7	1.3	4.1	9	114	0.604408
61	Diagnosis	1		5-AZA/VEN	CR/MLFS			62	0	no	46,XY	0	no	RUNX1, SRSF1, IDH2	no		no	no	yes	no	no	no	yes	no	yes	no	no	no	56.2	11.2	28.2	9.4	10	88	0.597957
65	Diagnosis	1		5-AZA/VEN	CR/MLFS			256	0	yes	47,XX,+8[20]	1	no	NRAS, RUNX1	no		no	no	yes	no	no	yes	no	no	no	no	no	no	78.6	12.1	5.2	1	4	60	0.632827
67	Diagnosis	1		5-AZA/VEN	CR/MLFS			288	0	no	46,XY	0	no	U2AF1, ASXL1, CEBPA	no	yes	no	no	no	no	no	no	no	yes	yes	no	no	no	56.7	11.3	32	11.3	47.2	92.9	0.76576
1	Diagnosis	2		5-AZA/VEN	PD/SD			27	1	yes	47,XX,+8,add(17)(q25)[6]	2	no	ASXL1, FLT3, NPM1, TET2	no		yes	no	no	yes	no	no	no	yes	no	yes	yes	no	0.18	4.84	91.1	36.0291	71.2	68.254	0.103726
2	Diagnosis	2		5-AZA/VEN	PD/SD			50	1	no	43~44,XY,add(1)(p34)[15],add(3)(q29)(20),-5[20],add(9)(q34)[20],-11[20],-16[9],-17[20],add(19)(q13.4)[13],add(21)(p13.3)[20],+mar[20][cp20]	3	yes	DNMT3A, TET2, TP53	no		yes	yes	no	no	yes	no	no	no	no	yes	no	no	79.4	14.2	1.84				0.107504
5	Diagnosis	2		5-AZA/VEN	PD/SD			123	1	no	46,XY,der(X)t(X;3)(q27;q21)(3)/46,XY[22]	1	no	ASXL1, EZH2, FLT3, NPM1, TET2	no	yes	yes	no	no	yes	no	no	no	yes	no	yes	yes	no	0.41	21.3	65.9	71.8	99.7	75.5152	0.147958
9	Diagnosis	2		5-AZA/VEN	PD/SD			70	1	no	46, XY[25].nuc ish 3q26(EVI1x2)[98/100], 11q23(MLLx2)[98/100]	2	no	NPM1, TET2	no		yes	no	no	no	no	no	no	no	no	yes	yes	no	0.45	91.7	1.72				0.212078
16	Diagnosis	2		5-AZA/VEN	PD/SD			87	1	no	46,XY	0	no	FLT3-ITD, EZH2, ASXL1, RUNX1	no	yes	yes	no	yes	yes	no	no	no	yes	no	no	no	no	2.77	39.6	22.2	28	48.9178	72.8516	0.27968
17	Diagnosis	2		5-AZA/VEN	CR/MLFS			179	1	no	46,XY, t(6;11)(q27;q23)	1	no	ASXL	no		no	no	no	no	no	no	no	yes	no	no	no	no	10.7	8.32	76.1				0.282752
18	Diagnosis	2		5-AZA/VEN	CR/MLFS			269	0	yes	46,XX	0	no	ASXL1, CALR, ETV6, EZH2, NRAS, STAG2	yes		no	no	no	no	no	yes	no	yes	no	no	no	yes	55.2	7.93	0.1	29.6	74.2991	58.7299	0.283923
19	Diagnosis	2		5-AZA/VEN	CR/MLFS			110	1	yes	46,XX	0	no	DDX41, FLT3-ITD, DNMT3A, IDH1	no		no	no	no	yes	yes	no	yes	no	no	no	no	no	27	18.8	9.19				0.287128
20	Diagnosis	2		5-AZA/VEN	CR/MLFS			214	1	no	43,XY,der(1),t(1;5)(p31;q23),der(3)t(1;3)(p31;p14),-5,-7,-16,-,17,+mar[15]/42,idem,der(3)t(9;7)(q22;q21),del(8)(p12),del(10)(p12),-17,-17,-18,+3mar[11]	3	yes	TP53, NF1	no		no	yes	no	no	no	no	no	no	no	no	no	no	14.1	3.5	76.5				0.303751
24	Diagnosis	2		5-AZA/VEN	CR/MLFS			189	0	yes	46,XX	0	no	IDH2,DNMT3A	no		no	no	no	no	yes	no	yes	no	no	no	no	no	2.1	83.5	0.12	5.6	12.2	41.2719	0.359564
31	Diagnosis	2		5-AZA/VEN	CR/MLFS			228	0	yes	45,X,-X[5]/46,XX[20].nuc isj 3q26(EVI1x2)[100/100], 11q23(MLLx2)[100/100)	2	no	BCORL1, DNMT3A, FLT3, NPM1, TET2	no		no	no	no	yes	yes	no	no	no	no	yes	yes	no	1.11	3.27	83.4				0.417594
32	Diagnosis	2		5-AZA/VEN	CR/MLFS			183	1	no	46,XY	0	no	ASXL1, EZH2, RUNX1, ZRSR2	no		no	no	yes	no	no	no	no	yes	yes	no	no	no	11.2	4.9	74.8				0.441065
37	Diagnosis	2		5-AZA/VEN	CR/MLFS			688	0	no	46,XY	0	no	NPM1, FLT1 (0.15), IDH2	no		no	no	no	yes	no	no	yes	no	no	no	yes	no	7.46	71.9	0.49	25.8	7.8	52.684	0.524405
40	Diagnosis	2		5-AZA/VEN	CR/MLFS			171	0	no	47,XY, +14 [9/46,XY, del (7)(q21)]	2	no	EZH2, PTPN11, SETBP1, U2AF1	no		no	no	no	no	no	no	no	no	yes	no	no	no	36.5	25.3	29.5	27.2	67.655	99.8588	0.550448
49	Diagnosis	2		5-AZA/VEN	CR/MLFS			360	1	yes	47,XX,add(5)(q11),i(8)(q10)x2,+8,inc[15]	3	yes	IDH2, RUNX1, SRSF2, TET2, TP53	no	yes	no	yes	yes	no	no	no	yes	no	yes	yes	no	no	41.8	29.3	1.41	0.7	2.4	73.3966	0.798861
53	Diagnosis	2		5-AZA/VEN	CR/MLFS			184	0	yes	47,XX,+8,t(12;22)(p13;q12)[25]	2	no	ASXL1, BCORL, DNMT3A, SRSF2	no		no	no	no	no	yes	no	no	yes	yes	no	no	no	11.9	39.5	31.5	33.5	48.8	106.52	0.83845
66	Diagnosis	2		5-AZA/VEN	CR/MLFS			273	0	no	46,XY	0	no	ASXL1, ABCA1, IDH2, SRSF2	no		no	no	no	no	no	no	yes	yes	yes	no	no	no	33.6	41.6	4.68	0.1	14.1	112.763	0.978099
69	Diagnosis	2		5-AZA/VEN	CR/MLFS			638	1	yes	46,XX	0	no	FLT3-TKD, IDH2, NPM1	no		no	no	no	yes	no	no	yes	no	no	no	yes	no	4.44	91.7	0.76				1.1892
75	Diagnosis	3		5-AZA/VEN	CR/MLFS			196	0	yes	45,X,-Y	1	no	TET2, NPM1	no		no	no	no	no	no	no	no	no	no	yes	yes	no							0.5817
76	Diagnosis	3		5-AZA/VEN	CR/MLFS			81	0	yes	47,XY +13	1	no	ASXL1, RUNX1, SRSF2	no		no	no	yes	no	no	no	no	yes	yes	no	no	no							0.454908
77	Diagnosis	3		5-AZA/VEN	CR/MLFS			123	0	no	45, XX,-7[19]/46,XX[1]	2	no	NPM1, TET2	no	yes	no	no	no	no	no	no	no	no	no	yes	yes	no							0.283858
78	Diagnosis	3		5-AZA/VEN	CR/MLFS			115	0	no	47, XX + 13, Isochromosom 21q	2	no	ASXL1, RUNX1, SRSF2, PTPN11	no	yes	no	no	yes	no	no	no	no	yes	yes	no	no	no							0.329145
79	Diagnosis	3		5-AZA/VEN	CR/MLFS			108	0	no	46,XX,add(17)(p11.2	1	no	DNMT3A, IDH1, KRAS	no		no	no	no	no	yes	yes	yes	no	no	no	no	no							1.14652
80	Diagnosis	3		5-AZA/VEN	CR/MLFS			90	0	no	No Karyotyp	N/A	N/A	U2AF1,SETBP1,NF1	no	yes	no	no	no	no	no	no	no	no	yes	no	no	no							1.15516
81	Diagnosis	3		5-AZA/VEN	PD/SD			31	1	no	47,XX +8	1	no	RUNX1, SRSF2, TET2, KRAS, NRAS, ZRSR2	no	yes	yes	no	yes	no	no	yes	no	no	yes	yes	no	no							0.104363
82	Diagnosis	3		5-AZA/VEN	CR/MLFS			43	0	yes	46,XY,i(17)(q10),12dmin[1]/47,sl,+8,i(17)(q10),0~14dmin[19]	3	no	TET2, DNMT3A, U2AF1	no		no	no	no	no	yes	no	no	no	yes	yes	no	no							0.478774
83	Diagnosis	3		5-AZA/VEN	CR/MLFS			41	0	yes	-	0	no	U2AF1, IDH2, DNMT3A, RUNX1	no		no	no	yes	no	yes	no	yes	no	yes	no	no	no							1.41056
84	Diagnosis	3		5-AZA/VEN	CR/MLFS			41	0	no	47~50,XX,+1~4mar[18]+r[3][cp19]/46,XX[1]	3	no	NRAS, TET2, DNMT3A, cKIT	no		no	no	no	no	yes	yes	no	no	no	yes	no	no							0.849587
85	Diagnosis	3		5-AZA/VEN	CR/MLFS			93	0	yes	46, XY	0	no	NPM1, PTPN11	no		no	no	no	no	no	yes	no	no	no	no	yes	no							0.693673
86	Diagnosis	3		5-AZA/VEN	CR/MLFS			66	0	no	46,XX	0	no	SRSF2, NPM1, IDH1	no		no	no	no	no	no	no	yes	no	yes	no	yes	no							1.14633
87	Diagnosis	3		5-AZA/VEN	CR/MLFS			45	0	no	80~126<4n>,XXX,-X[7],-2[5],-3[6],+6[2],+8[7],-9[5],-10[5],-11[7],del(11)(q23)[7],-12[7],-16[6], add(17)(p11.2)x2[6],-18[7],+19[2],-20[7],-20[6],+1~3mar[3],7~38dm[6][cp7]	3	yes	TP53	no		no	yes	no	no	no	no	no	no	no	no	no	no							0.532635
88	Diagnosis	3		5-AZA/VEN	CR/MLFS			721	1	no	18, 46, XX	0	no	NPM1, FLT3-ITD (0,17), IDH2	no		no	no	no	yes	no	no	yes	no	no	no	yes	no							0.489585
90	Diagnosis	3		5-AZA/VEN	CR/MLFS			130	1	no	20, 46,XX,t(9;11)(p22;q23)[25]	1	no	ASXL1, KRAS	no		no	no	no	no	no	yes	no	yes	no	no	no	no							0.25014
91	Diagnosis	3		5-AZA/VEN	PD/SD			17	1	no	24, 46,XX,t(6,11)(q27;q23)/46,XX	1	no	-	no		yes	no	no	no	no	no	no	no	no	no	no	no							0.355289
92	Diagnosis	3		5-AZA/VEN	CR/MLFS			115	1	no	46, XX	0	no	-	yes		no	no	no	no	no	no	no	no	no	no	no	no							0.179818
93	Diagnosis	3		5-AZA/VEN	CR/MLFS			42	0	yes	45,X,-Y[20]	1	no	IDH1, TET2, DNMT3a, NMP1	no		no	no	no	no	yes	no	yes	no	no	yes	yes	no							0.949822
94	Diagnosis	3		5-AZA/VEN	CR/MLFS			274	0	yes	46,XY	0	no	IDH2,	no		no	no	no	no	no	no	yes	no	no	no	no	no							0.8326
95	Diagnosis	3		5-AZA/VEN	CR/MLFS			189	1	no	46,XX	0	no	IDH1, DNMT3A	yes		no	no	no	no	yes	no	yes	no	no	no	no	no							0.463536
96	Diagnosis	3		5-AZA/VEN	CR/MLFS			77	0	no	46XX	0	no	DNMT3A, IDH1	no		no	no	no	no	yes	no	yes	no	no	no	no	no							0.853544
97	Diagnosis	3		5-AZA/VEN	CR/MLFS			301	0	no	46,XX	0	no	IDH2, NPM1	no		no	no	no	no	no	no	yes	no	no	no	yes	no							0.56819
98	Diagnosis	3		5-AZA/VEN	CR/MLFS			224	0	yes	46, XY,del(3)(p25p21)[14]/46,XY[6]	2	no	EZH2, NRAS, JAK2	no		no	no	no	no	no	yes	no	no	no	no	no	yes							0.423771
99	Diagnosis	3		5-AZA/VEN	PD/SD			52	1	yes	46,X,-Y,t(9;11)(p21;q23)[1]/46,sl,+8[19]	3	no	-	no	yes	yes	no	no	no	no	no	no	no	no	no	no	no							0.243533
12	Diagnosis	4- RR		DA (BP)--> HAM --> (BP)		5-AZA/VEN	PD/SD	1	1	yes	45,XX,-7[15]/45,idem,t(2;4)(p23;q25)[2]/45,idem,del(4)(?q31),+?14,-21			-	no		yes	no	no	no	no	no	no	no	no	no	no	no							0.254564
26	Diagnosis	4- RR		DA+Midostaurin --> PD		5-AZA/VEN	CR/MLFS	90	1	yes	46, XX			NPM1, FLT3-ITD (Ratio 0,95), DMT3A	no		no	no	no	yes	yes	no	no	no	no	no	yes	no							0.39271
27	Diagnosis	4- RR		Vyxeos--> (BP)		5-AZA/VEN	CR/MLFS	539	0	yes	45,XX,-7[16]/ 47,XX,+8[2]			RUNX1, SRSF2, Tet2	yes		no	no	yes	no	no	no	no	no	yes	yes	no	no							0.392445
34	Diagnosis	4- RR		DA--> (BP)		5-AZA/VEN	CR/MLFS	519	0	yes	47,XX +13			ASXL1, RUNX1, SRSF2	yes		no	no	yes	no	no	no	no	yes	yes	no	no	no							0.469142
46	Diagnosis	4- RR		DA+GO --> (BP)		5-AZA/VEN	CR/MLFS	127	0	yes	46,XX			CEBPA (biallel), RUNX1, DNMT3A, ASXL1,IDH1	no		no	no	yes	no	yes	no	yes	yes	no	no	no	no							0.605125
60	Diagnosis	4- RR		DA+GO --> (BP)		5-AZA/VEN	CR/MLFS	142	0	yes	47,XX+8			RUNX1,IDH2	yes		no	no	yes	no	no	no	no	no	no	no	no	no							0.885986
63	Diagnosis	4- RR		DA--> (BP)		5-AZA/VEN	CR/MLFS	150	1	no	46, XY			ASXL1, DNMT3a, IDH2, CBL, ZRSR2	yes		no	no	no	no	yes	no	yes	yes	yes	no	no	no							0.989589
71	Diagnosis	4- RR		DA(BP) --> HAM --> (BP)		5-AZA/VEN	CR/MLFS	250	0	no	47,XY,+13			DNMT3A, IDH1, RUNX1,SRSF2	yes		no	no	yes	no	yes	no	yes	no	yes	no	no	no							0.480945
72	Diagnosis	4- RR		Vyxeos (PR) --> Vyxeos --> (PD)		5-AZA/VEN	CR/MLFS	584	0	yes	46,XX			RUNX1,IDH1,DNMT3a	no		no	no	yes	no	yes	no	yes	no	no	no	no	no							0.758668
73	Diagnosis	4- RR		Vyxeos --> (CR,MRD+)		5-AZA/VEN	CR/MLFS	212	1	yes	46,XX,del(7)(q22)[5]/46,sl,del(20)(q11.2)			IDH2,DNMT3a	yes		no	no	no	no	yes	no	yes	no	no	no	no	no							0.54
100	Salvage	4- RR		DA --> (BP)		5-AZA/VEN	CR/MLFS	757	0	no	46,XY			IDH1, RUNX1, SRSF2, TET2	yes		no	no	yes	no	no	no	yes	no	yes	yes	no	no							0.71
101	Salvage	4- RR		DA(BP) --> HAM --> (BP)		5-AZA/VEN	CR/MLFS	99	0	yes	47,XX,+22[16]/48,XX,+22,+22[9]			DNMT3A	yes		no	no	no	no	yes	no	no	no	no	no	no	no							1.04828
102	Salvage	4- RR		LDAC+Glasdegib --> (PD)		5-AZA/VEN	CR/MLFS	534	1	no	46,XY,del(20)(q12q13)[8]/46,XY,der(13)t(1;13)(q11;p11)[5]/46,XY[7]			CBL, RAD21, SRSF2, TET2, ZRSR2	no		no	no	no	no	no	no	no	no	yes	yes	no	no							0.69
103	Salvage	4- RR		alloTX ->Relapse -->FLAG-IDA --> (PD)		5-AZA/VEN	CR/MLFS	210.99	1	no	47,XY,+21[3]/46,XY,t(5;13)(q23;q14)[3]/46,XY,del(6)(q16q26),t(6;13)(p24;q21)[2]/46,XY[12]			FLT3-ITD, SF3B1, BCOR, NF1, ASXL2, Calreticulin	yes		no	no	no	yes	no	no	no	no	yes	no	no	yes							0.21
104	Salvage	4- RR		CPX --> (BP)		5-AZA/VEN	CR/MLFS	408	0	no	46,XY,+1,der(1;7)(q10;p10)			IDH1, JAK2, STAG2	yes		no	no	no	no	no	no	yes	no	no	no	no	yes							0.26
105	Salvage	4- RR		alloTX (relapse) --> FLA-IDA +Radiatio --> (PD)		5-AZA/VEN	CR/MLFS	103	1	no	46, XY			FLT-ITD	no		no	no	no	yes	no	no	no	no	no	no	no	no							0.52
106	Salvage	4- RR		5-AZA --> (PD)		5-AZA/VEN	PD/SD	102	1	no	46, XY			CEBPA monoallelic, CSF3R, RUNX1, TET2, U2AF1, NRAS	no		yes	no	yes	no	no	yes	no	no	yes	yes	no	no							0.37
107	Salvage	4- RR		alloTX --> (relapse)		5-AZA/VEN	PD/SD	37.8	1		t(Y;1), +18p, +1			JAK2, SETBP1, SMC3, NF1	no		yes	no	no	no	no	yes	no	no	no	no	no	yes							0.25
108	Salvage	4- RR		5-Aza (PD) --> DA (PD) --> AXL-I -->(PD)		5-AZA/VEN	PD/SD	114	1	yes	46,XX[1].nuc. ish [100]			BCOR, BCORL, DNMT3A, GATA2, IDH1, NRAS, KRAS, STAG2	no		yes	no	no	no	yes	yes	yes	no	no	no	no	no							0.38
109	Salvage	4- RR		LDAC+Polo-I --> (PD)		5-AZA/VEN	N/A	288.9	1	no	46, XY 25.nuc ish cen8(CEP8x2) 100			IDH2, SRSF2, RUNX1	no		N/A	no	yes	no	no	no	yes	no	yes	no	no	no							0.67
110	Salvage	4- RR		DA --> (BP)		5-AZA/VEN	PD/SD	43	1		-			TET2 biallelic	no		yes	no	no	no	no	no	no	no	no	yes	no	no							0.53
111	Salvage	4- RR		5-AZA+Gilteritinib --> PD		5-AZA/VEN	PD/SD	22	1	no	46,XY[15].nuc ish 3q26(EVI1x2)[97/100], 11q23(MLLx2)[93/100]			FLT3-ITD, SRSF2	no		yes	no	no	yes	no	no	no	no	yes	no	no	no							0.39
112	Salvage	4- RR		alloTX --> (relapse)		5-AZA/VEN	PD/SD	18	1	no	47,XY,del(1)(p35),t(1;9;11)(p22;p21;q21),+8[15]			FLT3, CBL, GATA2	no		yes	no	no	yes	no	no	no	no	no	no	no	no							0.39
SVs: Structural Variant; EFS: Event-free Survival in Days; BP: blast persistence; HAM: high dose AraC+Mitoxantron; DA: Daunorubicin+AraC

## Sheet: Supplementary Table 5
Supplemental Table 5. Summary of patient data in Figure 5E
																			Ex vivo 5-AZA/VEN
AML Number	P-ID	Karyotype	Hotspot Mutations	SVs	Complex	Refractory	TP53	RUNX1	FLT3	DNMT3A	NRAS/KRAS	IDH1/2	ASXL1	Splicing	TET2	NPM1	JAK2/CALR	MAC-Score	Viability LSC %
1	Diagnosis	47,XX,+8,add(17)(q25)[6]	ASXL1, FLT3, NPM1, TET2	2	no	yes	no	no	yes	no	no	no	yes	no	yes	yes	no	0.103726	36.0291
2	Diagnosis	43~44,XY,add(1)(p34)[15],add(3)(q29)(20),-5[20],add(9)(q34)[20],-11[20],-16[9],-17[20],add(19)(q13.4)[13],add(21)(p13.3)[20],+mar[20][cp20]	DNMT3A, TET2, TP53	3	yes	yes	yes	no	no	yes	no	no	no	no	yes	no	no	0.107504	3.66864
3	Diagnosis	46, XY, del(5)(q31q33), del(13)(q12q14), del(21)(q22)	JAK2, TP53, TET2	3	yes	yes	yes	no	no	no	no	no	no	no	yes	no	yes	0.100274
4	Diagnosis	45,X,-X,t(8;21)(q21;q22)	-	1	no	n/a	no	no	no	no	no	no	no	no	no	no	no	0.136404	20.1
5	Diagnosis	46,XY,der(X)t(X;3)(q27;q21)(3)/46,XY[22]	ASXL1, EZH2, FLT3, NPM1, TET2	1	no	yes	no	no	yes	no	no	no	yes	no	yes	yes	no	0.147958	71.8
6	Diagnosis	46,XY,der(4)t(4;15)(p16;q22),t(6;11)(p23;q25),del(11)(q13),der(15)t(11;15)(q13;q24),t(18;19)(q21;q13.1), AML aus PMF, Z.n. 2xallo, PMF	ASXL1	3	yes	yes	no	no	no	no	no	no	yes	no	no	no	no	0.105869	12.8
7	Diagnosis	47,XY,+13[5]/46,sl,-Y[6]/46,XY[9]	-	2	no	n/a	no	no	no	no	no	no	no	no	no	no	no	0.16451	29.8
8	Diagnosis	45,XX,add(4)(p15),del(5)(q22q35),add(7)(q21),+8,dic(9;12)(p13;p13),-11,-15,add(19)(q13.4), +r(?11)[15]/45,XX,sl,-dic(9;12)(p13;p13),add(9)(p13),-12[5]	DNMT3A R729; TP53; RUNX1	3	yes	yes	yes	yes	no	yes	no	no	no	no	no	no	no	0.128394	6
9	Diagnosis	46, XY[25].nuc ish 3q26(EVI1x2)[98/100], 11q23(MLLx2)[98/100]	NPM1, TET2	2	no	yes	no	no	no	no	no	no	no	no	yes	yes	no	0.212078
10	Diagnosis	46,XY,dup(1)(p13p36),del(3)(q23),del(5)(q13q33)[9]/45,sl,-17[11]	NF1	3	yes	yes	no	no	no	no	no	no	no	no	no	no	no	0.077325	31.9
11	Diagnosis	46, XY	NPM1, IDH2, SRSF2, NRAS, braf	0	no	n/a	no	no	no	no	yes	yes	no	yes	no	yes	no	0.255286	12
12	Diagnosis	45,XX,-7[15]/45,idem,t(2;4)(p23;q25)[2]/45,idem,del(4)(?q31),+?14,-21	-	3	yes	n/a	no	no	no	no	no	no	no	no	no	no	no	0.254564	2.4
13	Diagnosis	46,XY	Tet2, DNMT3A, NPM1	0	no	n/a	no	no	no	yes	no	no	no	no	yes	yes	no	0.280295	36.1
14	Diagnosis	46, XY	ASXL1, EZH2	0	no	n/a	no	no	no	no	no	no	yes	no	no	no	no	0.283101	56
15	Diagnosis	Normal, Runxt1l-Runx1, 8;21	-	1	no	n/a	no	no	no	no	no	no	no	no	no	no	no	0.260514	28.9
16	Diagnosis	46,XY	FLT3-ITD, EZH2, ASXL1, RUNX1	0	no	yes	no	yes	yes	no	no	no	yes	no	no	no	no	0.27968	28
17	Diagnosis	46,XY, t(6;11)(q27;q23)	ASXL	1	no	no	no	no	no	no	no	no	yes	no	no	no	no	0.282752
18	Diagnosis	46,XX	ASXL1, CALR, ETV6, EZH2, NRAS, STAG2	0	no	no	no	no	no	no	yes	no	yes	no	no	no	yes	0.283923	29.6
19	Diagnosis	46,XX	DDX41, FLT3-ITD, DNMT3A, IDH1	0	no	no	no	no	yes	yes	no	yes	no	no	no	no	no	0.287128
20	Diagnosis	43,XY,der(1),t(1;5)(p31;q23),der(3)t(1;3)(p31;p14),-5,-7,-16,-,17,+mar[15]/42,idem,der(3)t(9;7)(q22;q21),del(8)(p12),del(10)(p12),-17,-17,-18,+3mar[11]	TP53, NF1	3	yes	no	yes	no	no	no	no	no	no	no	no	no	no	0.303751
21	Diagnosis	46, XY;	NRAS, CEBPA (biallelic), FLT3-ITD (0.1 ratio)	0	no	n/a	no	no	no	yes	yes	no	no	no	no	no	no	0.327177
22	Diagnosis	43~46,XX, del(5)(q21q34),add(6)(p22),-7,add(7)(q21),add(9)(q34),-10,add(10)(q24),add(11)(p15),add(11)(q24),add(13)(p13)(p13),-17,-18,add(19)(q13),+2mar[cp15].nuc ish 3q26(EVI1x2)[99/100],11q23(MLLx3~100)[26/100]	TP53	3	yes	yes	yes	no	no	no	no	no	no	no	no	no	no	0.205657	20.9
23	Diagnosis	46,XX(15)	NPM1, TET2	0	no	yes	no	no	no	no	no	no	no	no	yes	yes	no	0.301876	51.6
24	Diagnosis	46,XX	IDH2,DNMT3A	0	no	no	no	no	no	yes	no	yes	no	no	no	no	no	0.359564	5.6
25	Diagnosis	46, XY	Runx1, FLT3-ITD, ASXL1	0	no	n/a	no	yes	yes	no	no	no	yes	no	no	no	no	0.38677	23
26	Diagnosis	46, XX	NPM1, FLT3-ITD (Ratio 0,95), DMT3A	0	no	n/a	no	no	yes	yes	no	no	no	no	no	yes	no	0.39271	3.2
27	Diagnosis	45,XX,-7[16]/47,XX,+8[2]	RUNX1, Srsf2, Tet2	2	no	n/a	no	yes	no	no	no	no	no	yes	yes	no	no	0.392445	12
28	Diagnosis	46, XY	CEBPA biallelisch	0	no	n/a	no	no	no	no	no	no	no	no	no	no	no	0.366709	12.2
29	Diagnosis	47,XY,+8,add(12)(p13),-15,add(17)(p12),+21[7]/46,XY[13]	JAK2(V617F), IDH2, SRSF2, RUNX1	3	yes	yes	no	yes	no	no	no	yes	no	yes	no	no	yes	0.263845	8
30	Diagnosis	46, XY	NPM1, DNMT3A, FLT3-ITD (Ratio 9,82)	0	no	n/a	no	no	yes	yes	no	no	no	no	no	yes	no	0.407882	11
31	Diagnosis	45,X,-X[5]/46,XX[20].nuc isj 3q26(EVI1x2)[100/100], 11q23(MLLx2)[100/100)	BCORL1, DNMT3A, FLT3, NPM1, TET2	2	no	no	no	no	yes	yes	no	no	no	no	yes	yes	no	0.417594
32	Diagnosis	46,XY	ASXL1, EZH2, RUNX1, ZRSR2	0	no	no	no	yes	no	no	no	no	yes	yes	no	no	no	0.441065
33	Diagnosis	46,XX	FLT3, NPM1, DNMT3a	0	no	n/a	no	no	yes	yes	no	no	no	no	no	yes	no	0.458935	5
34	Diagnosis	47,XX +13	ASXL1, RUNX1, SRSF2	1	no	n/a	no	yes	no	no	no	no	yes	yes	no	no	no	0.469142	4
35	Diagnosis	Trisomie 8q21	RUNX1 , DNMT3A, IDH1	1	no	n/a	no	yes	no	yes	no	yes	no	no	no	no	no	0.478477	0.1
36	Diagnosis	Normal	ASXL1, TET2, MPL, STAG2	0	no	n/a	no	no	no	no	no	no	yes	no	yes	no	no	0.492804	2
37	Diagnosis	46,XY	NPM1, FLT1 (0.15), IDH2	0	no	no	no	no	yes	no	no	yes	no	no	no	yes	no	0.524405	25.8
38	Diagnosis	46, XY	NPM1, FLT3 ITD (7.9)	0	no	n/a	no	no	yes	no	no	no	no	no	no	yes	no	0.563692	4
39	Diagnosis	46,XY,del(16)(p13.1),1~19dmin[13]/46,XY,del(16)(p13.1)[3]/46,XY,2~15dmin[3]/46,XY[, Tet2]	TET2	1	no	n/a	no	no	no	no	no	no	no	no	yes	no	no	0.563218	1
40	Diagnosis	47,XY, +14 [9/46,XY, del (7)(q21)]	EZH2, PTPN11, SETBP1, U2AF1	2	no	no	no	no	no	no	no	no	no	yes	no	no	no	0.550448	27.2
41	Diagnosis	46,XX	TET2, DNMT3A, KRAS, WT1	0	no	no	no	no	no	yes	yes	no	no	no	yes	no	no	0.361912	13.9
42	Diagnosis	46,XY	IDH2, ASXL1, DNMT3A	0	no	yes	no	no	no	yes	no	yes	yes	no	no	no	no	0.414235
43	Diagnosis	Runxt1l-Runx1, 8;21, 45, -X	-	1	no	n/a	no	no	no	no	no	no	no	no	no	no	no	0.556705	7.8
44	Diagnosis	Normal	ASXL1, NRAS, TET2, ZRSR2, CBL	0	no	n/a	no	no	no	no	yes	no	yes	yes	yes	no	no	0.621837	8.7
45	Diagnosis	47,XY,+13[5]/48,sl,+8[15]	RUNX1, SRSF1, IDH1, TET2	2	no	no	no	yes	no	no	no	yes	no	yes	yes	no	no	0.400876	10
46	Diagnosis	46,XX	CEBPA (biallel), RUNX1, DNMT3A, ASXL1, IDH1	0	no	n/a	no	yes	no	yes	no	yes	yes	no	no	no	no	0.605125
47	Diagnosis	46, XY	TET2, DNMT3A, NPM1, FLT3	0	no	n/a	no	no	yes	yes	no	no	no	no	yes	yes	no	0.615338	5
48	Diagnosis	: 46, XY	NPM1, TET2, DNMT3a	0	no	n/a	no	no	no	yes	no	no	no	no	yes	yes	no	0.761539	28.7
49	Diagnosis	47,XX,add(5)(q11),i(8)(q10)x2,+8,inc[15]	IDH2, RUNX1, SRSF2, TET2, TP53	3	yes	no	yes	yes	no	no	no	yes	no	yes	yes	no	no	0.621942	6.1
50	Diagnosis	48XY, +13,+14	NRAS, RUNX1	2	no	n/a	no	yes	no	no	yes	no	no	no	no	no	no	0.828036	1
51	Diagnosis	46,XX	NPM1	0	no	no	no	no	no	no	no	no	no	no	no	yes	no	0.59608
53	Diagnosis	47,XX,+8,t(12;22)(p13;q12)[25]	ASXL1, BCORL, DNMT3A, SRSF2	2	no	no	no	no	no	yes	no	no	yes	yes	no	no	no	0.83845	33.5
54	Diagnosis	46,XY,del5q(q31q35)	-	1	no	no	no	no	no	no	yes	no	no	no	no	no	no	0.56263	2.3
55	Diagnosis	46,XY,t(8;21)	-	1	no	n/a	no	no	no	no	no	no	no	no	no	no	no	0.814596	9
56	Diagnosis	Del-7, t(3;3) (EVI-rearrangement)	NRAS, KRAS	2	no	n/a	no	no	no	no	yes	no	no	no	no	no	no	0.888719
57	Diagnosis	46,XX	DNMT3A, NPM1	0	no	no	no	no	no	yes	no	no	no	no	no	yes	no	0.615851	12
58	Diagnosis	46, XY	NRAS, DNMT3A, NPM1, FLT3(low)	0	no	n/a	no	no	yes	yes	yes	no	no	no	no	yes	no	0.86612	2.9
59	Diagnosis	46,XY	DNMT3A, NPM1, KRAS	0	no	no	no	no	no	yes	yes	no	no	no	no	yes	no	0.604408	4.1
60	Diagnosis	47,XX+8	RUNX1, IDH2	1	no	n/a	no	yes	no	no	no	yes	no	no	no	no	no	0.885986
61	Diagnosis	46,XY	RUNX1, SRSF1, IDH2	0	no	no	no	yes	no	no	no	yes	no	yes	no	no	no	0.597957	9.4
63	Diagnosis	46, XY	ASXL1, DNMT3a, IDH2, CBL, ZRSR2	0	no	n/a	no	no	no	yes	no	yes	yes	yes	no	no	no	0.989589	14
64	Diagnosis	46,XX,t(12;22)(p13;q12); FusionMN1-TEL(ETV6)	BCOR,KDM6	2	no	n/a	no	no	no	no	no	no	no	no	no	no	no	0.903279	62.2775
65	Diagnosis	47,XX,+8[20]	NRAS, RUNX1	1	no	no	no	yes	no	no	yes	no	no	no	no	no	no	0.632827	1
66	Diagnosis	46,XY	ASXL1, ABCA1, IDH2, SRSF2	0	no	no	no	no	no	no	no	yes	yes	yes	no	no	no	0.978099	0.1
67	Diagnosis	46,XY	U2AF1, ASXL1, CEBPA	0	no	no	no	no	no	no	no	no	yes	yes	no	no	no	0.76576	11.3
68	Diagnosis	46, XY	DNMT3A, FLT3, NPM1	0	no	n/a	no	no	yes	yes	no	no	no	no	no	yes	no	1.1771	1.9
69	Diagnosis	46,XX	FLT3-TKD, IDH2, NPM1	0	no	no	no	no	yes	no	no	yes	no	no	no	yes	no	1.1892
70	Diagnosis	46, XX,(ad9)(p13)	IDH2, DNMT3A	1	no	n/a	no	no	no	yes	no	yes	no	no	no	no	no	1.49649	16.3
71	Diagnosis	47,XY,+13	DNMT3A, IDH1, RUNX1,SRSF2	1	no	n/a	no	yes	no	yes	no	yes	no	yes	no	no	no	1.04828
72	Diagnosis	46,XX	RUNX1,IDH1,DNMT3a	0	no	n/a	yes	no	yes	no	yes	no	no	no	no	no	no	0.480945
73	Diagnosis	46,XX,del(7)(q22)[5]/46,sl,del(20)(q11.2)	IDH2, DNMT3A	2	no	n/a	no	no	yes	no	yes	no	no	no	no	no	no	0.758668
74	Diagnosis	N/A	N/A	N/A	N/A	N/A	N/A	N/A	N/A	N/A	N/A	N/A	N/A	N/A	N/A	N/A	N/A	N/A	30.4
75	Diagnosis	45,X,-Y	TET2, NPM1	1	no	no	no	no	no	no	no	no	no	no	yes	yes	no	0.5817
76	Diagnosis	47,XY +13	ASXL1, RUNX1, SRSF2	1	no	no	no	yes	no	no	no	no	yes	yes	no	no	no	0.454908
77	Diagnosis	45, XX,-7[19]/46,XX[1]	NPM1, TET2	2	no	no	no	no	no	no	no	no	no	no	yes	yes	no	0.283858
78	Diagnosis	47, XX + 13, Isochromosom 21q	ASXL1, RUNX1, SRSF2, PTPN11	2	no	no	no	yes	no	no	no	no	yes	yes	no	no	no	0.329145
79	Diagnosis	46,XX,add(17)(p11.2	DNMT3A-, IDH1, KRAS	1	no	no	no	no	no	yes	yes	yes	no	no	no	no	no	1.14652
80	Diagnosis	No Karyotyp	U2AF1,SETBP1,NF1	N/A	N/A	no	no	no	no	no	no	no	no	yes	no	no	no	1.15516
81	Diagnosis	47,XX +8	RUNX1, SRSF2, TET2, KRAS, NRAS, ZRSR2	1	no	yes	no	yes	no	no	yes	no	no	yes	yes	no	no	0.104363
82	Diagnosis	46,XY,i(17)(q10),12dmin[1]/47,sl,+8,i(17)(q10),0~14dmin[19]	TET2, DNMT3A, U2AF1	3	no	no	no	no	no	yes	no	no	no	yes	yes	no	no	0.478774
83	Diagnosis	-	U2AF1, IDH2, DNMT3A, RUNX1	0	no	no	no	yes	no	yes	no	yes	no	yes	no	no	no	1.41056
84	Diagnosis	47~50,XX,+1~4mar[18]+r[3][cp19]/46,XX[1]	NRAS, TET2, DNMT3a,cKIT	3	no	no	no	no	no	yes	yes	no	no	no	yes	no	no	0.849587
85	Diagnosis	46, XY	NPM1, PTPN11	0	no	no	no	no	no	no	yes	no	no	no	no	yes	no	0.693673
86	Diagnosis	46,XX	SRSF2, NPM1, IDH1	0	no	no	no	no	no	no	no	yes	no	yes	no	yes	no	1.14633
87	Diagnosis	80~126<4n>,XXX,-X[7],-2[5],-3[6],+6[2],+8[7],-9[5],-10[5],-11[7],del(11)(q23)[7],-12[7],-16[6], add(17)(p11.2)x2[6],-18[7],+19[2],-20[7],-20[6],+1~3mar[3],7~38dm[6][cp7]	TP53	3	yes	no	yes	no	no	no	no	no	no	no	no	no	no	0.532635
88	Diagnosis	18, 46, XX	NPM1, FLT3-ITD (0,17), IDH2	0	no	no	no	no	yes	no	no	yes	no	no	no	yes	no	0.489585
90	Diagnosis	20, 46,XX,t(9;11)(p22;q23)[25]	ASXL1, KRAS	1	no	no	no	no	no	no	yes	no	yes	no	no	no	no	0.25014
91	Diagnosis	24, 46,XX,t(6,11)(q27;q23)/46,XX	-	1	no	yes	no	no	no	no	no	no	no	no	no	no	no	0.355289
92	Diagnosis	46, XX	-	0	no	no	no	no	no	no	no	no	no	no	no	no	no	0.179818
93	Diagnosis	45,X,-Y[20]	IDH1, TET2, DNMT3A, NMP1	1	no	no	no	no	no	yes	no	yes	no	no	yes	yes	no	0.949822
94	Diagnosis	46,XY	IDH2,	0	no	no	no	no	no	no	no	yes	no	no	no	no	no	0.8326
95	Diagnosis	46,XX	IDH1, DNMT3A	0	no	no	no	no	no	yes	no	yes	no	no	no	no	no	0.463536
96	Diagnosis	46XX	DNMT3A, IDH1	0	no	no	no	no	no	yes	no	yes	no	no	no	no	no	0.853544
97	Diagnosis	46,XX	IDH2, NPM1	0	no	no	no	no	no	no	no	yes	no	no	no	yes	no	0.56819
98	Diagnosis	46, XY,del(3)(p25p21)[14]/46,XY[6]	EZH2, NRAS, JAK2	2	no	no	no	no	no	no	yes	no	no	no	no	no	yes	0.423771
99	Diagnosis	46,X,-Y,t(9;11)(p21;q23)[1]/46,sl,+8[19]	-	3	no	yes	no	no	no	no	no	no	no	no	no	no	no	0.243533
SVs: Structural Variant

## Sheet: Supplementary Table 6
Supplemental Table 6. Antibody panel
Target	Manufacturer	Clone Identifier	Dilution
CD64	BioLegend	10.1	100
CD34	BD Horizon	581	100
CD33	BioLegend	WH53	100
CD11b	BioLegend	ICRF44	100
GPR56	BioLegend	CG4	100
BCL-2	Cell Signaling Technology	124	50
MCL1	Cell Signaling Technology	D2W9E	50
BCL-xL	Cell Signaling Technology	54H6	50
Mouse IgG1	Cell Signaling Technology	MOPC-21	100
Rabbit IgG1	Cell Signaling Technology	DA1E	200
CD56	BioLegend	5.1H11	100
CD45	BioLegend	HI30	100
CD3	Biolegend	OKT3	300
CD19	BioLegend	HIB19	100
CD20	Biolegend	2H7	300
CD235a	BD Horizon	GA-R2	300

## Sheet: Supplementary Table 7
Supplemental Table 7. Overview of all assays
		RNA-seq
AML Number	Intracellular staining	LSC-like	Non-LSC	Mature	BH3-profiling (Supplementary Figure 6)	Prim-AML/Mono-AML Comparison
1	yes
2	yes
3	yes				yes
4	yes
5	yes				yes
6	yes
7	yes
8	yes	yes	yes
9	yes
10	yes				yes
11	yes					yes
12	yes
13	yes	yes		yes		yes
14	yes	yes		yes		yes
15	yes
16	yes				yes
17	yes
18	yes
19	yes
20	yes
21	yes
22	yes	yes	yes	yes
23	yes
24	yes
25	yes	yes		yes		yes
26	yes	yes		yes		yes
27	yes	yes		yes		yes
28	yes
29	yes				yes
30	yes	yes		yes		yes
31	yes
32	yes
33	yes	yes		yes		yes
34	yes	yes		yes		yes
35	yes	yes		yes
36	yes
37	yes
38	yes	yes		yes		yes
39	yes	yes		yes		yes
40	yes
41	yes	yes	yes	yes
42	yes	yes	yes
43	yes
44	yes
45	yes	yes	yes	yes
46	yes
47	yes
48	yes	yes		yes		yes
50	yes	yes		yes
51	yes				yes	yes
52	yes	yes		yes
53	yes
54	yes				yes
55	yes
56	yes
57	yes	yes		yes	yes
58	yes					yes
59	yes
60	yes
61	yes
49	yes	yes	yes	yes	yes
63	yes	yes		yes		yes
64	yes	yes		yes
65	yes
66	yes
67	yes				yes	yes
68	yes	yes		yes		yes
69	yes
70	yes
71	yes
72	yes
73	yes
74	yes					yes
75	yes
76	yes
77	yes				yes
78	yes
79	yes
80	yes				yes
81	yes				yes
82	yes
83	yes
84	yes
85	yes
86	yes
87	yes
88	yes
90	yes
91	yes
92	yes
93	yes
94	yes
95	yes
96	yes
97	yes
98	yes
99	yes				yes
100	yes
101	yes
102	yes
103	yes
104	yes
105	yes
106	yes
107	yes
108	yes
109	yes
110	yes
111	yes
112	yes
